# Supplementary material for: Capacity for heat absorption by the wings of the butterfly Tirumala limniace (Cramer)
Source: PeerJ. 2019 Mar 25;7:e6648. doi: 10.7717/peerj.6648 (PMC6438159; doi:10.7717/peerj.6648)
Supplement: Supplemental Information 1 — Table s1 in File S1 showed the results of one-way ANOVA analysis of differences in heat absorption ability under different light intensities at the same wing opening angle in butterflies Tirumala limniace; And Table S2 in File S1 showed the results of one-way ANOVA analysis of differences in heat absorption ability under different wing opening angle at the same light intensity in butterflies Tirumala limniace. [file peerj-07-6648-s001.xls]

## Sheet: Sheet1
Heat absorption at different light intensities and wing opening angles
Male butterfly							Female butterfly
Light intensity (lx)	Wing opening angle (°)	Equilibrium thoracic temperature(℃)	Time (min) required to reach equilibrium temperature	Thoracic temperature excess (DT)(℃）	Rate (℃/min) of thoracic temperature increase		Light intensity (lx)	Wing opening angle (°)	Equilibrium thoracic temperature(℃)	Time (min) required to reach equilibrium temperature	Thoracic temperature excess (DT)(℃）	Rate (℃/min) of thoracic temperature increase
600	15	27.4	13.8667	5.64	0.406731		600	15	28.08	11.8	6.15	0.521186		Table s1 The results of one-way ANOVA analysis of differences in heat absorption ability under different light intensities at the same wing opening angle in butterflies Tirumala limniace.
600	15	28.94	9.33333	8.82	0.945		600	15	28.71	16.3833	8.2	0.500509		Sex	Source		15°	30°	45°	60°	75°	80°	90°	120°	150°	180°
600	15	35.47	12.7167	12.58	0.989253		600	15	43.76	12.7333	16.37	1.2856		Male	Equilibrium thoracic temperature	DF Model	5	5	5	5	5	5	5	5	5	5
5000	15	38.03	10.85	13.43	1.23779		5000	15	39.11	9.85	16.26	1.65076				DF Error	12	12	12	12	12	12	12	12	12	12
5000	15	50.86	10.85	24.69	2.27558		5000	15	40.26	12.0333	18.41	1.52992				F	14.89	24.04	13.3	15.41	28.51	20.66	31.82	107.86	52.08	28.42
5000	15	53.53	7.33333	26.11	3.56045		5000	15	55.92	8.86667	28.6	3.22556				P	<0.0001	<0.0001	0.0002	<0.0001	<0.0001	<0.0001	<0.0001	<0.0001	<0.0001	<0.0001
15000	15	58.43	6.51667	37.51	5.75601		15000	15	51.1	8.85	27.69	3.12881			Time required to reach equilibrium temperature	DF Model	5	5	5	5	5	5	5	5	5	5
15000	15	60.08	9.33333	35.1	3.76071		15000	15	49.27	7.73333	26.55	3.43319				DF Error	12	12	12	12	12	12	12	12	12	12
15000	15	67.04	7.98333	40.52	5.07557		15000	15	72.53	11.9333	44.94	3.76592				F	15.72	5.7	6.31	10.28	7.14	10.25	48.43	9.27	13.48	8.17
25000	15	59.41	4.23333	36.51	8.62441		25000	15	64.18	5.7	43.88	7.69825				P	<0.0001	0.0064	0.0043	0.0005	0.0026	0.0005	<0.0001	0.0008	<0.0001	0.0015
25000	15	66.26	4.98333	44.88	9.00602		25000	15	62.71	4.51667	41.94	9.28561			ΔT	DF Model	5	5	5	5	5	5	5	5	5	5
25000	15	66.51	4.11667	41.83	10.1611		25000	15	67.77	3.95	44.29	11.2127				DF Error	12	12	12	12	12	12	12	12	12	12
40000	15	64.59	3.6	42.49	11.8028		40000	15	83.09	7.81667	61.02	7.8064				F	13.85	21.5	13.22	15.89	27.82	19.18	36.38	98.02	59.15	27.65
40000	15	76.95	5.16667	54.66	10.5794		40000	15	74.27	5.63333	52.15	9.2574				P	<0.0001	<0.0001	0.0002	<0.0001	<0.0001	<0.0001	<0.0001	<0.0001	<0.0001	<0.0001
40000	15	75.23	4.18333	49.72	11.8853		40000	15	92.53	5.2	67.3	12.9423			Rate of thoracic temperature increase	DF Model	5	5	5	5	5	5	5	5	5	5
60000	15	65.99	3.35	36.65	10.9403		60000	15	78.94	5.7	57.65	10.114				DF Error	12	12	12	12	12	12	12	12	12	12
60000	15	75.01	3.78333	49.09	12.9753		60000	15	89.81	4.96667	68.04	13.6993				F	61.86	72.09	42.27	12.62	15.78	15.63	70.94	5.63	13.16	15.8
60000	15	93.58	4.53333	66.66	14.7044		60000	15	90.07	4.43333	62.04	13.994				P	<0.0001	<0.0001	<0.0001	0.0002	<0.0001	<0.0001	<0.0001	0.0067	0.0002	<0.0001
600	30	33.36	14.0333	11.66	0.830879		600	30	28.42	8.45	6.22	0.736095		Female	Equilibrium thoracic temperature	DF Model	5	5	5	5	5	5	5	5	5	5
600	30	28.82	9.03333	9	0.99631		600	30	26.89	15.1333	6.6	0.436123				DF Error	12	12	12	12	12	12	12	12	12	12
600	30	35.68	8.73333	12.01	1.37519		600	30	40.9	14.65	14.28	0.974744				F	16.78	11.42	11.35	8.05	13.15	11.17	9.03	15.66	10.47	12.65
5000	30	42.23	9.85	17.96	1.82335		5000	30	45.11	9.38333	22.95	2.44583				P	<0.0001	0.0003	0.0003	0.0015	0.0002	0.0004	0.0008	<0.0001	0.0005	0.0002
5000	30	52.22	11.05	27.8	2.51584		5000	30	39.25	13.75	17	1.23636			Time required to reach equilibrium temperature	DF Model	5	5	5	5	5	5	5	5	5	5
5000	30	49.7	5.03333	22.57	4.48411		5000	30	56.3	9	29.87	3.31889				DF Error	12	12	12	12	12	12	12	12	12	12
15000	30	58.28	5.4	37.68	6.97778		15000	30	55.97	8.06667	32.54	4.03388				F	13.51	8.12	13.07	5.93	38.35	10.2	15.79	36.69	64.95	8.77
15000	30	60.52	6.8	35.45	5.21324		15000	30	50.9	6.83333	28.3	4.14146				P	<0.0001	0.0015	0.0002	0.0055	<0.0001	0.0005	<0.0001	<0.0001	<0.0001	0.0011
15000	30	66.46	6.56667	38.39	5.84619		15000	30	71.23	11.1667	43.89	3.93045			ΔT	DF Model	5	5	5	5	5	5	5	5	5	5
25000	30	65.75	4.38333	44.55	10.1635		25000	30	59.09	4.73333	38.11	8.05141				DF Error	12	12	12	12	12	12	12	12	12	12
25000	30	64.68	4.66667	42.35	9.075		25000	30	57.93	4.26667	37.24	8.72813				F	29.87	19.72	20.47	14.77	28.1	24.07	15.11	36.26	20.61	31.04
25000	30	59.85	3.3	35.52	10.7636		25000	30	59.69	3.36667	33.71	10.0129				P	<0.0001	<0.0001	<0.0001	<0.0001	<0.0001	<0.0001	<0.0001	<0.0001	<0.0001	<0.0001
40000	30	64.99	3.88333	42.7	10.9957		40000	30	72.43	4.78333	50.13	10.4801			Rate of thoracic temperature increase	DF Model	5	5	5	5	5	5	5	5	5	5
40000	30	70.62	4.93333	48.17	9.76419		40000	30	70.27	5.78333	48.18	8.33084				DF Error	12	12	12	12	12	12	12	12	12	12
40000	30	72.4	4.26667	46.49	10.8961		40000	30	71.21	3.5	45.82	13.0914				F	26.84	39.33	9.43	8.46	31.23	8.66	12.71	10.24	49.27	13.87
60000	30	67.7	3.16667	40.22	12.7011		60000	30	64.04	3.18333	42.47	13.3414				P	<0.0001	<0.0001	0.0008	0.0012	<0.0001	0.0011	0.0002	0.0005	<0.0001	<0.0001
60000	30	87.12	5.68333	61.55	10.8299		60000	30	76.95	4.93333	55.45	11.2399
60000	30	88.13	5.16667	61.65	11.9323		60000	30	90.27	5.86667	62.61	10.6722
600	45	30.51	7.45	9.16	1.22953		600	45	30.6	7.4	8.62	1.16486
600	45	32.64	5.93333	12.17	2.05112		600	45	31.2	7.85	10.92	1.39108
600	45	39.51	10.3833	16.83	1.62087		600	45	45.98	8.78333	18.85	2.14611
5000	45	44.59	6.88333	19.78	2.87361		5000	45	46.41	6.53	23.78	3.64165		Table s2 The results of one-way ANOVA analysis of differences in heat absorption ability under different wing opening angle at the same light intensity in butterflies Tirumala limniace.
5000	45	54.75	6.81667	30.43	4.46406		5000	45	43.14	7.35	19.87	2.7034		Sex	Source		600lx	5000lx	15000lx	25000lx	40000lx	60000lx
5000	45	59.07	5.35	32.35	6.04673		5000	45	60.71	4.93333	31.88	6.46216		Male	Equilibrium thoracic temperature	DF Model	9	9	9	9	9	9
15000	45	58.65	4.43333	37.64	8.49023		15000	45	56.79	5.25	33.61	6.4019				DF Error	20	20	20	20	20	20
15000	45	62.76	5.1	37.66	7.38431		15000	45	55.74	4.53333	32.85	7.24632				F	1.4	1.29	0.97	3.92	1.78	0.65
15000	45	68.94	4.66667	42.44	9.09429		15000	45	73.78	4.73333	46.14	9.74789				P	0.2538	0.3035	0.4916	0.0053	0.1345	0.7384
25000	45	62.97	3.7	41.73	11.2784		25000	45	64.62	3.08333	43.47	14.0984			Time required to reach equilibrium temperature	DF Model	9	9	9	9	9	9
25000	45	69.51	4.03333	48.2	11.9504		25000	45	63.69	2.86667	43.54	15.1884				DF Error	20	20	20	20	20	20
25000	45	71.4	3.8	47.11	12.3974		25000	45	65.38	3.68333	40.71	11.0525				F	1.52	0.84	3.97	7.28	3.83	2.57
40000	45	68.25	2.78333	46.25	16.6168		40000	45	76.53	4.43333	54.19	12.2233				P	0.2063	0.5918	0.0049	0.0001	0.0059	0.0379
40000	45	78.86	5.01667	56.66	11.2944		40000	45	74.48	3.2	52.81	16.5031			ΔT	DF Model	9	9	9	9	9	9
40000	45	84.67	3.73333	59.13	15.8384		40000	45	78.96	2.75	54.44	19.7964				DF Error	20	20	20	20	20	20
60000	45	68.12	2.1	40.62	19.3429		60000	45	68.41	1.61667	47.14	29.1588				F	2.03	1.56	3.03	3.26	2.33	0.56
60000	45	95.63	4.45	69.02	15.5101		60000	45	86.83	4.65	60.5	13.0108				P	0.0848	0.1946	0.0186	0.0133	0.05	0.8161
60000	45	98.47	3.9	71.39	18.3051		60000	45	97.46	2.1	71.13	33.8714			Rate of thoracic temperature increase	DF Model	9	9	9	9	9	9
600	60	33.75	11.9	12.65	1.06303		600	60	32.15	7.01667	10.6	1.51069				DF Error	20	20	20	20	20	20
600	60	35.41	7.56667	14.74	1.94802		600	60	29.43	10.45	9.15	0.875598				F	5.53	0.6	3.31	6.62	7.44	7.76
600	60	39.58	9.95	16.3	1.63819		600	60	42.42	7.06667	15.35	2.17217				P	0.0007	0.7784	0.0123	0.0002	<0.0001	<0.0001
5000	60	43.6	5.98333	18.93	3.16379		5000	60	46.47	4.46667	23.95	5.36194		Female	Equilibrium thoracic temperature	DF Model	9	9	9	9	9	9
5000	60	58.15	8.25	34.9	4.2303		5000	60	39.57	4.33333	17.82	4.11231				DF Error	20	20	20	20	20	20
5000	60	61.42	4.41667	33.07	7.48755		5000	60	60.93	5.5	33.32	6.05818				F	0.24	0.22	0.3	2.55	3.36	0.65
15000	60	59.71	2.93333	38.51	13.1284		15000	60	54.47	4.13333	31.37	7.58952				P	0.9843	0.9888	0.9647	0.0389	0.0116	0.7437
15000	60	63.96	4.58333	38.94	8.496		15000	60	53.23	2.66667	29.77	11.1637			Time required to reach equilibrium temperature	DF Model	9	9	9	9	9	9
15000	60	67.04	3.05	40.66	13.3311		15000	60	73.33	5.9	45.4	7.69492				DF Error	20	20	20	20	20	20
25000	60	66.94	3.11667	44.19	14.1786		25000	60	66.46	3.66667	45.65	12.45				F	4.18	6.9	5.83	3.06	6.43	3.59
25000	60	71.02	3.33333	49.56	14.868		25000	60	65.22	3.6	44.92	12.4778				P	0.0037	0.0002	0.0005	0.018	0.0003	0.0083
25000	60	74.1	3.08333	48.99	15.8886		25000	60	67.61	1.8	42.91	23.8389			ΔT	DF Model	9	9	9	9	9	9
40000	60	69.33	1.93333	47.23	24.4293		40000	60	70.97	2.6	48.9	18.8077				DF Error	20	20	20	20	20	20
40000	60	81.06	3.26667	58.9	18.0306		40000	60	72.58	3.48333	50.99	14.6383				F	0.73	0.39	0.53	2.12	5.08	1.19
40000	60	92.04	4.33333	67.02	15.4662		40000	60	78.64	1.86667	54	28.9286				P	0.6766	0.9259	0.8355	0.077	0.0012	0.352
60000	60	72.35	1.61667	44.45	27.4948		60000	60	68.83	1.76667	47.59	26.9377			Rate of thoracic temperature increase	DF Model	9	9	9	9	9	9
60000	60	81.06	1.83333	54.62	29.7927		60000	60	74.72	2.31667	53.69	23.1755				DF Error	20	20	20	20	20	20
60000	60	92.03	4.58333	66.47	14.5025		60000	60	104.39	5.46667	75.64	13.8366				F	2.32	1.85	5.23	2.66	2.68	4.45
600	75	33.32	7.15	12.43	1.73846		600	75	33	6.68667	10.78	1.61216				P	0.05	0.1207	0.001	0.0329	0.0319	0.0026
600	75	37.06	13.05	17.06	1.30728		600	75	30.96	6.30333	10.73	1.70227
600	75	38.46	6.73333	15.95	2.36881		600	75	42.78	6.45333	16.74	2.59401
5000	75	45.79	6.88333	21.03	3.05521		5000	75	45.17	5.27	22.22	4.21632
5000	75	55.79	8.15	30.68	3.76442		5000	75	41.88	4.70333	20.28	4.31184
5000	75	58.43	3.3	31.82	9.64242		5000	75	60.72	4.22	33.64	7.97156
15000	75	64.22	2.83333	42.4	14.9647		15000	75	54.66	2.85333	31.55	11.0572
15000	75	65.92	4.26667	40.85	9.57422		15000	75	53.87	2.33667	30.97	13.2539
15000	75	71.03	2.65	43.93	16.5774		15000	75	72.51	4.22	44.81	10.6185
25000	75	69.1	2.43333	47.4	19.4795		25000	75	64	2.37	42.97	18.1308
25000	75	72.24	2.55	49.14	19.2706		25000	75	64.28	2.37	45.43	19.1688
25000	75	74.04	2.41667	51.2	21.1862		25000	75	68.64	1.75	42.95	24.5429
40000	75	68.71	1.21667	47.14	38.7452		40000	75	71.16	2.43667	49.59	20.3516
40000	75	81.82	3.08333	59.62	19.3362		40000	75	73.63	2.17	51.68	23.8157
40000	75	82.04	1.93333	57.54	29.7621		40000	75	76.61	2.42	52.27	21.5992
60000	75	76.58	1.06667	49.58	46.4812		60000	75	69	1.03667	48.08	46.3794
60000	75	92.12	2.38333	67.46	28.3049		60000	75	79.2	1.98667	57.84	29.1141
60000	75	91.82	1.35	67	49.6296		60000	75	87	1.35	59.19	43.8444
600	80	36.62	13.7667	15.34	1.11429		600	80	31.15	8.88333	9.25	1.04128
600	80	32.11	10.1167	12.15	1.20099		600	80	30.66	9.91667	10.5	1.05882
600	80	37.8	8.78333	15.49	1.76357		600	80	42.07	8.58333	13.74	1.60078
5000	80	42.45	5.81667	16.1	2.76791		5000	80	44.12	7.78333	21.65	2.78158
5000	80	49.21	9.61667	25.67	2.66932		5000	80	43.43	7.08333	22.07	3.11576
5000	80	54.81	3.55	28.63	8.06479		5000	80	54.17	5.85	26.4	4.51282
15000	80	60.23	3.11667	40.1	12.8663		15000	80	47.98	3.36667	24.77	7.35743
15000	80	63.15	4.03333	38.38	9.5157		15000	80	54.88	3.13333	32.22	10.283
15000	80	68.57	3.95	41.88	10.6025		15000	80	74.89	8.28333	47	5.67404
25000	80	64.84	3.15	42.81	13.5905		25000	80	63.93	3.55	43.47	12.2451
25000	80	68.01	2.56667	47.41	18.4714		25000	80	61.54	2.56667	41.05	15.9935
25000	80	70.05	2.7	45.99	17.0333		25000	80	69.83	2.63333	46.99	17.8443
40000	80	67.65	2.03333	45.65	22.4508		40000	80	70.89	3.63333	49.81	13.7092
40000	80	80.33	2.93333	58.34	19.8886		40000	80	69.24	2.8	47.09	16.8179
40000	80	81.27	3.83333	57.63	15.0339		40000	80	76.62	1.83333	52.23	28.4891
60000	80	68.96	1.28333	42.35	33		60000	80	70.51	1.38333	49.41	35.7181
60000	80	91.31	3.66667	66.35	18.0955		60000	80	75.21	2.68333	54.4	20.2733
60000	80	85.06	2.71667	61.9	22.7853		60000	80	92.25	3.85	64.34	16.7117
600	90	34.99	6.53333	13.79	2.11071		600	90	36.84	6.11667	14.99	2.45068
600	90	33.91	6.4	14.26	2.22812		600	90	29.18	9.61667	8.54	0.888042
600	90	37	6.58333	14.16	2.15089		600	90	41.18	9.18333	14.44	1.57241
5000	90	44.55	6.78333	19.88	2.93071		5000	90	43.92	5.56667	21.68	3.89461
5000	90	45.82	5.96667	23.19	3.88659		5000	90	35.67	3.53333	15.3	4.33019
5000	90	57.45	4.8	31.96	6.65833		5000	90	58.85	5.45	31.91	5.85505
15000	90	58.97	3.31667	37.46	11.2945		15000	90	50.17	3.91667	27.29	6.96766
15000	90	61.12	4.73333	36.87	7.78944		15000	90	48.08	2.16667	25.52	11.7785
15000	90	69.25	4.08333	42.33	10.3665		15000	90	68.43	4.33333	40.68	9.38769
25000	90	61.08	2.75	38.87	14.1345		25000	90	59.55	3	29.48	9.82667
25000	90	69.04	3.35	48.36	14.4358		25000	90	62.63	3.05	43.26	14.1836
25000	90	71.68	2.41667	48.13	19.9159		25000	90	67.45	2.43333	43.76	17.9836
40000	90	69.46	1.31667	47.57	36.1291		40000	90	66.37	2.91667	45.29	15.528
40000	90	77.5	1.58333	55.59	35.1095		40000	90	66.27	1.78333	45.12	25.3009
40000	90	78.88	1.25	54.79	43.832		40000	90	76.94	1.23333	52.98	42.9568
60000	90	78.48	1.01667	52.96	52.0918		60000	90	69.21	1.65	46.91	28.4303
60000	90	81.92	1.48333	57.58	38.818		60000	90	70.51	1.28333	49.19	38.3299
60000	90	90.12	1.38333	66.24	47.8843		60000	90	83.44	1.35	54.61	40.4519
600	120	29.34	9.06667	8.36	0.922059		600	120	30.52	9.4	8.28	0.880851
600	120	33.6	14.3833	14.03	0.975435		600	120	25.68	9.9	6.21	0.627273
600	120	35.68	11.4	12.56	1.10175		600	120	39.65	8.46667	11.99	1.41614
5000	120	40.38	7.95	14.31	1.8		5000	120	42.8	4.75	20.35	4.28421
5000	120	45.98	8.31667	22.86	2.7487		5000	120	34.14	5.05	12.78	2.53069
5000	120	44.99	2.46667	18.87	7.65		5000	120	54.74	6.31667	26.69	4.22533
15000	120	59.05	2.91667	37.99	13.0251		15000	120	54.66	3.56667	31.18	8.74206
15000	120	59.24	6.36667	34.82	5.46911		15000	120	46.74	3.13333	21.26	6.78511
15000	120	65.39	4.71667	38.99	8.26643		15000	120	62.53	4.83333	33.7	6.97241
25000	120	60.13	2.9	38.61	13.3138		25000	120	61.08	3.35	40.56	12.1075
25000	120	64.77	3.31667	42.75	12.8894		25000	120	59.83	3.46667	40.42	11.6596
25000	120	62.17	1.7	36.46	21.4471		25000	120	66.22	2.8	44.47	15.8821
40000	120	70.88	1.75	49.21	28.12		40000	120	68.31	3.61667	46.71	12.9152
40000	120	72.97	3.63333	50.64	13.9376		40000	120	64.12	3.8	42.65	11.2237
40000	120	74.94	2.7	49.98	18.5111		40000	120	76.54	3.23333	51.96	16.0701
60000	120	74.24	1.28333	49.27	38.3922		60000	120	75.99	1.63333	54.88	33.6
60000	120	78.43	3.78333	53.24	14.0722		60000	120	69.652	2.75	48.052	17.4735
60000	120	78.9	2.86667	54.51	19.0151		60000	120	82.22	3.31667	54.12	16.3176
600	150	28.32	8.13333	7.33	0.90123		600	150	28.74	10.05	8.25	0.820896
600	150	27.13	9.56667	7.55	0.789199		600	150	26.18	8.48333	6.51	0.767387
600	150	35.47	10	11.99	1.199		600	150	38.1	9.43333	12.87	1.36431
5000	150	39.74	8.28333	15.28	1.84467		5000	150	40.11	7.1	18.79	2.64648
5000	150	42.31	8.9	20.19	2.26854		5000	150	34.73	6.01667	14.03	2.33186
5000	150	46.95	4.33333	20.1	4.63846		5000	150	55.76	6.3	27.8	4.4127
15000	150	57.55	2.95	36.5	12.3729		15000	150	45.4	3.81667	21.69	5.68297
15000	150	58.57	5.18333	34.78	6.70997		15000	150	44.97	2.76667	22.68	8.19759
15000	150	61.38	3.18333	34.51	10.8408		15000	150	66.62	3.83333	37.84	9.8713
25000	150	56.33	2.53333	34.48	13.6105		25000	150	54.86	3.8	34.54	9.08947
25000	150	60.12	2.28333	40	17.5182		25000	150	56.89	2.63333	37.9	14.3924
25000	150	65.57	2.66667	42.46	15.9225		25000	150	64.96	3.01667	41.89	13.8862
40000	150	67.03	2.08333	43.73	20.9904		40000	150	57.94	2.5	36.52	14.608
40000	150	70.38	2.95	47.62	16.1424		40000	150	63.31	2.76667	41.49	14.9964
40000	150	69.14	3.45	44.26	12.829		40000	150	67.1	3.6	43.44	12.0667
60000	150	67.63	1.68333	42.25	25.099		60000	150	72.22	2.56667	51.67	20.1312
60000	150	78.48	3.3	54.29	16.4515		60000	150	70.53	2.08333	46.76	22.4448
60000	150	74.33	3.86667	47.95	12.4009		60000	150	72.52	2.33333	45.13	19.3414
600	180	27.46	9.13333	6.44	0.705109		600	180	27.6	7.85	5.29	0.673885
600	180	29.27	14.0667	12.06	0.857346		600	180	27.34	11.55	7.38	0.638961
600	180	34.55	9.93333	12.51	1.2594		600	180	37.47	7.95	10.19	1.28176
5000	180	33.13	4.31667	7.53	1.7444		5000	180	35.63	7.31667	13.78	1.88337
5000	180	40.64	9.13333	16.48	1.80438		5000	180	38.56	8.53333	17.69	2.07305
5000	180	50.27	4.05	22.07	5.44938		5000	180	52.97	4.15	24.68	5.94699
15000	180	56.71	3.8	36.9	9.71053		15000	180	49.82	5.2	27.69	5.325
15000	180	59.47	8.28333	36.07	4.35453		15000	180	42.71	2.68333	21.44	7.99006
15000	180	62.46	3.91667	37.77	9.6434		15000	180	62.85	3.38333	35.35	10.4483
25000	180	58.51	2.63333	36.87	14.0013		25000	180	55.52	4.61667	35.65	7.72202
25000	180	61.67	3.5	42.67	12.1914		25000	180	58.47	3.71667	40.74	10.9614
25000	180	58.24	3.01667	35.13	11.6453		25000	180	62.8	2.31667	41.12	17.7496
40000	180	61.22	1.33333	38.7	29.025		40000	180	63.27	3.88333	43.06	11.0884
40000	180	67.06	3.13333	46.51	14.8436		40000	180	63.04	2.48333	42.36	17.0577
40000	180	64.36	1.93333	39.74	20.5552		40000	180	75.05	3.61667	51.72	14.3005
60000	180	66.5	2.36667	40.48	17.1042		60000	180	67.41	2.95	45.57	15.4475
60000	180	74.8	3.66667	50.23	13.6991		60000	180	67.69	1.75	43.49	24.8514
60000	180	81.27	3.43333	54.77	15.9524		60000	180	80.33	2.36667	52.79	22.3056

## Sheet: Sheet2
							Table 8 The results of one-way ANOVA analysis of differences in heat absorption ability under different wing opening angle at the same light intensity in butterflies Tirumala limniace.
							Sex	Source		600lx	5000lx	15000lx	25000lx	40000lx	60000lx
							Male	Equilibrium thoracic temperature	DF Model	9	9	9	9	9	9
									DF Error	20	20	20	20	20	20
									F	1.4	1.29	0.97	3.92	1.78	0.65
									P	0.2538	0.3035	0.4916	0.0053	0.1345	0.7384
								Time required to reach equilibrium temperature	DF Model	9	9	9	9	9	9
									DF Error	20	20	20	20	20	20
									F	1.52	0.84	3.97	7.28	3.83	2.57
									P	0.2063	0.5918	0.0049	0.0001	0.0059	0.0379
								ΔT	DF Model	9	9	9	9	9	9
									DF Error	20	20	20	20	20	20
									F	2.03	1.56	3.03	3.26	2.33	0.56
									P	0.0848	0.1946	0.0186	0.0133	0.05	0.8161
								Rate of thoracic temperature increase	DF Model	9	9	9	9	9	9
									DF Error	20	20	20	20	20	20
									F	5.53	0.6	3.31	6.62	7.44	7.76
									P	0.0007	0.7784	0.0123	0.0002	<0.0001	<0.0001
							Female	Equilibrium thoracic temperature	DF Model	9	9	9	9	9	9
									DF Error	20	20	20	20	20	20
									F	0.24	0.22	0.3	2.55	3.36	0.65
									P	0.9843	0.9888	0.9647	0.0389	0.0116	0.7437
								Time required to reach equilibrium temperature	DF Model	9	9	9	9	9	9
									DF Error	20	20	20	20	20	20
									F	4.18	6.9	5.83	3.06	6.43	3.59
									P	0.0037	0.0002	0.0005	0.018	0.0003	0.0083
								ΔT	DF Model	9	9	9	9	9	9
									DF Error	20	20	20	20	20	20
									F	0.73	0.39	0.53	2.12	5.08	1.19
									P	0.6766	0.9259	0.8355	0.077	0.0012	0.352
								Rate of thoracic temperature increase	DF Model	9	9	9	9	9	9
									DF Error	20	20	20	20	20	20
									F	2.32	1.85	5.23	2.66	2.68	4.45
									P	0.05	0.1207	0.001	0.0329	0.0319	0.0026
