# Supplementary material for: Capacity for heat absorption by the wings of the butterfly Tirumala limniace (Cramer)
Source: PeerJ. 2019 Mar 25;7:e6648. doi: 10.7717/peerj.6648 (PMC6438159; doi:10.7717/peerj.6648)
Supplement: Supplemental Information 6 [file peerj-07-6648-s006.xls]

## Sheet: Sheet1
Data of heat absorption in four different scale removal treatments
SDR treatment: The removal of scales from dark areas
SLR treatment: The removal of scales from light areas
ASR treatment: The removal of all scales from the wings
IN treatment: Leaving the scales intact on the wings
Treatment	Equilibrium thoracic temperature(℃)	Time (min) required to reach equilibrium temperature	Thoracic temperature excess (DT)(℃）	Rate (℃/min) of thoracic temperature increase
SDR	46.361	9.70533	21.561	2.22157
	45.0301	12.116	22.5301	1.85953
	44.0182	9.004	21.3182	2.36764
SLR	53.1205	7.90067	30.5205	3.86303
	52.4119	7.454	27.2047	3.64968
	52.4504	7.316	26.1927	3.58019
ASR	45.5925	8.80707	20.1765	2.29094
	41.8795	8.57133	17.4399	2.03467
	45.7398	12.6273	20.7494	1.64321
IN	51.4308	6.35667	26.1356	4.11153
	53.2114	6.13067	28.915	4.71645
	54.992	5.90467	31.6943	5.36767
