# Supplementary material for: Capacity for heat absorption by the wings of the butterfly Tirumala limniace (Cramer)
Source: PeerJ. 2019 Mar 25;7:e6648. doi: 10.7717/peerj.6648 (PMC6438159; doi:10.7717/peerj.6648)
Supplement: Supplemental Information 8 [file peerj-07-6648-s008.xls]

## Sheet: Sheet1
Data of real-time temperature of wing vein heat transfer channel
Real-time Temperature (℃) of Fore wing																					Real-time Temperature (℃) of Hind wing
Time	Vein A channel					Time	Vein Cu-Cu3 channel						Time	Vein Cu-Cu2 channel							Time	Vein 1A channel					Time	Vein Cu-Cu2 channel					Time	Vein Cu-Cu1 channel						Time	Vein Cu-M-M3 channel							Time	Vein Cu-M-M1 channel
	A-1	A-2	A-3	A-4	A-5		Cu-1	Cu-2	Cu-3	Cu3-4	Cu3-5	Cu3-6		Cu-1	Cu-2	Cu-3	Cu3-4	Cu2-5	Cu2-6			1A-1	1A-2	1A-3	1A-4	1A-5		Cu-1	Cu-2	Cu-3	Cu2-4	Cu2-5		Cu-1	Cu-2	Cu-3	Cu-4	Cu1-5	Cu1-6		Cu-1	Cu-2	Cu-3	Cu-4	M-5	M3-6	M3-7		R-1
0	25.6167	25.99	26.0916	26.3688	26.5576	0	25.5078	25.7594	25.9765	26.2337	26.4093	26.4902	0	25.5078	25.7594	25.9765	26.1254	26.6318	26.6048		0	25.242	25.8883	25.8544	26.0171	26.4363	0	25.4057	25.8883	25.9765	26.0984	26.362	0	25.4057	25.8883	25.8951	25.9222	26.2539	26.5509	0	25.4057	25.8883	25.8951	25.9222	26.0645	26.1863	26.5105	0	25.3648
0.04	25.5895	25.9832	26.1051	26.3755	26.5239	0.04	25.5146	25.7798	25.9493	26.2472	26.416	26.5846	0.04	25.5146	25.7798	25.9493	26.1457	26.5711	26.5779		0.04	25.2216	25.9087	25.8883	25.9426	26.4025	0.04	25.3716	25.8205	25.9629	26.051	26.3283	0.04	25.3716	25.8205	25.9154	25.868	26.2337	26.5711	0.04	25.3716	25.8205	25.9154	25.9832	26.0645	26.2201	26.47	0.04	25.3443
0.08	25.5827	25.99	26.1187	26.3418	26.5239	0.08	25.5827	25.7933	25.9561	26.1322	26.47	26.6318	0.08	25.5827	25.7933	25.9561	26.1051	26.5509	26.5576		0.08	25.2079	25.9629	25.868	25.9493	26.497	0.08	25.4057	25.8408	25.9426	26.0916	26.335	0.08	25.4057	25.8408	25.9493	25.8544	26.2134	26.5981	0.08	25.4057	25.8408	25.9493	26.0239	26.0916	26.1863	26.4632	0.08	25.3648
0.12	25.6847	26.2337	26.1931	26.5172	26.5981	0.12	25.6643	25.9087	26.051	26.2877	26.6048	26.7327	0.12	25.6643	25.9087	26.051	26.2066	26.7058	26.7395		0.12	25.3375	25.9765	25.9426	26.1119	26.4295	0.12	25.3921	25.9629	26.0374	26.1931	26.4835	0.12	25.3921	25.9629	26.0307	26.0374	26.335	26.7193	0.12	25.3921	25.9629	26.0307	26.1119	26.1863	26.281	26.6654	0.12	25.3784
0.16	25.739	26.2201	26.2539	26.6183	26.7462	0.16	25.7118	25.9697	26.1931	26.4632	26.6318	26.8471	0.16	25.7118	25.9697	26.1931	26.5442	26.7596	26.8538		0.16	25.283	25.99	26.0307	26.2269	26.5374	0.16	25.4806	26.1187	26.1457	26.335	26.5779	0.16	25.4806	26.1187	26.1525	26.0781	26.4565	26.8269	0.16	25.4806	26.1187	26.1525	26.1796	26.1998	26.2945	26.7327	0.16	25.4329
0.2	25.8205	26.335	26.3688	26.6991	26.9075	0.2	25.7186	26.166	26.2337	26.5037	26.6318	26.8605	0.2	25.7186	26.166	26.2337	26.497	26.8538	26.8739		0.2	25.3239	26.0781	26.0645	26.3688	26.6048	0.2	25.5555	26.1254	26.1254	26.5442	26.6183	0.2	25.5555	26.1254	26.1322	26.1525	26.5442	26.8739	0.2	25.5555	26.1254	26.1322	26.3283	26.1931	26.4767	26.7327	0.2	25.4534
0.24	25.7798	26.4228	26.4902	26.7395	27.0015	0.24	25.7458	26.1931	26.335	26.5442	26.6318	26.8538	0.24	25.7458	26.1931	26.335	26.6452	27.0217	27.0015		0.24	25.3512	26.1457	26.0984	26.3958	26.7529	0.24	25.5827	26.1863	26.1457	26.5105	26.6789	0.24	25.5827	26.1863	26.1998	26.281	26.5779	26.9613	0.24	25.5827	26.1863	26.1998	26.362	26.2674	26.6318	26.8202	0.24	25.4738
0.28	25.868	26.5307	26.5172	26.8134	27.1357	0.28	25.9426	26.3283	26.3755	26.6318	26.8403	26.9814	0.28	25.9426	26.3283	26.3755	26.6452	27.0418	27.0753		0.28	25.3784	26.1931	26.1187	26.4228	26.8672	0.28	25.5623	26.2404	26.1728	26.6183	26.7798	0.28	25.5623	26.2404	26.2066	26.4295	26.6183	26.9747	0.28	25.5623	26.2404	26.2066	26.4295	26.4228	26.6722	26.968	0.28	25.501
0.32	25.8815	26.5981	26.5307	26.8739	27.1625	0.32	25.8273	26.416	26.4228	26.6991	26.8471	27.0619	0.32	25.8273	26.416	26.4228	26.7462	27.1491	27.1156		0.32	25.3784	26.2674	26.1457	26.5037	26.8672	0.32	25.5623	26.3823	26.2472	26.6722	26.8067	0.32	25.5623	26.3823	26.2337	26.4902	26.6654	27.0284	0.32	25.5623	26.3823	26.2337	26.6048	26.4363	26.7664	27.0217	0.32	25.5827
0.36	25.9629	26.6115	26.5509	26.9747	27.1692	0.36	25.9154	26.4632	26.4498	26.7798	26.9948	27.0552	0.36	25.9154	26.4632	26.4498	26.8067	27.1692	27.129		0.36	25.4874	26.4498	26.281	26.4767	26.968	0.36	25.5691	26.5374	26.3215	26.7058	26.8672	0.36	25.5691	26.5374	26.2539	26.5374	26.7664	27.0955	0.36	25.5691	26.5374	26.2539	26.7193	26.497	26.8874	27.196	0.36	25.6779
0.4	26.0577	26.6048	26.5846	26.9814	27.2429	0.4	25.9358	26.4632	26.5239	26.8739	26.9881	27.0753	0.4	25.9358	26.4632	26.5239	26.8403	27.1625	27.2295		0.4	25.4874	26.5239	26.2877	26.4902	26.9948	0.4	25.5895	26.6048	26.2945	26.8134	26.8874	0.4	25.5895	26.6048	26.2742	26.5981	26.8134	27.1156	0.4	25.5895	26.6048	26.2742	26.726	26.5913	26.8672	27.2897	0.4	25.6711
0.44	26.0645	26.7529	26.6048	27.0418	27.0887	0.44	25.9968	26.6115	26.6587	26.8538	27.0686	27.129	0.44	25.9968	26.6115	26.6587	26.9344	27.196	27.2362		0.44	25.4534	26.4632	26.281	26.4498	27.1223	0.44	25.6167	26.6587	26.5307	26.8403	26.9075	0.44	25.6167	26.6587	26.2134	26.6722	26.8739	27.2295	0.44	25.6167	26.6587	26.2134	26.7865	26.6183	26.8807	27.3366	0.44	25.6235
0.48	26.1525	26.7596	26.6991	27.1089	27.2362	0.48	26.0577	26.652	26.7865	26.9142	27.0955	27.3098	0.48	26.0577	26.652	26.7865	26.9881	27.196	27.2295		0.48	25.4874	26.4902	26.2472	26.5576	27.0284	0.48	25.6982	26.8336	26.4632	26.9948	27.0082	0.48	25.6982	26.8336	26.2472	26.726	26.9344	27.2496	0.48	25.6982	26.8336	26.2472	26.8807	26.6789	26.9008	27.2897	0.48	25.739
0.52	26.1796	26.7933	26.7664	27.1558	27.263	0.52	26.1051	26.6991	26.8874	26.9075	27.2027	27.3232	0.52	26.1051	26.6991	26.8874	27.0552	27.263	27.2362		0.52	25.4534	26.5644	26.2742	26.5442	27.0351	0.52	25.6847	26.8134	26.4498	26.9344	26.9478	0.52	25.6847	26.8134	26.3823	26.726	27.0015	27.2027	0.52	25.6847	26.8134	26.3823	26.8807	26.7193	26.9814	27.3098	0.52	25.8748
0.56	26.2201	26.8739	26.8	27.1424	27.37	0.56	26.0984	26.8471	26.9478	26.9948	27.2429	27.3567	0.56	26.0984	26.8471	26.9478	27.2094	27.3031	27.3232		0.56	25.4602	26.5846	26.2945	26.5846	27.1558	0.56	25.7594	26.8336	26.5105	26.9948	27.0015	0.56	25.7594	26.8336	26.4835	26.8605	27.0284	27.2764	0.56	25.7594	26.8336	26.4835	26.9747	26.7395	27.015	27.2964	0.56	25.8883
0.6	26.2607	26.8941	26.8471	27.1491	27.3767	0.6	26.0984	26.9881	27.0753	27.015	27.263	27.3968	0.6	26.0984	26.9881	27.0753	27.2094	27.4503	27.4168		0.6	25.4261	26.6722	26.3012	26.6115	27.1357	0.6	25.773	26.8807	26.5711	27.0686	27.2429	0.6	25.773	26.8807	26.5509	26.8807	27.1156	27.3901	0.6	25.773	26.8807	26.5509	27.0217	26.7395	27.0955	27.3433	0.6	25.9019
0.64	26.3215	26.8874	26.8605	27.1558	27.35	0.64	26.2201	27.1491	27.1089	27.0887	27.2295	27.4235	0.64	26.2201	27.1491	27.1089	27.283	27.5371	27.3834		0.64	25.5214	26.7731	26.5037	26.6924	27.2094	0.64	25.8408	26.9075	26.5779	27.1089	27.196	0.64	25.8408	26.9075	26.5442	26.9277	27.1022	27.3433	0.64	25.8408	26.9075	26.5442	27.0619	26.7462	27.1089	27.4703	0.64	25.929
0.72	26.3688	26.9277	26.8605	27.2295	27.4837	0.72	26.2472	27.0887	27.1558	27.1491	27.3633	27.4904	0.72	26.2472	27.0887	27.1558	27.3968	27.5304	27.35		0.72	25.5351	26.8403	26.4498	26.7193	27.2027	0.72	25.8951	26.9747	26.6183	27.2897	27.1826	0.72	25.8951	26.9747	26.6452	26.9545	27.2094	27.5104	0.72	25.8951	26.9747	26.6452	27.1491	26.7865	27.0887	27.3767	0.72	25.9426
0.76	26.389	26.9814	26.9344	27.3232	27.5571	0.76	26.3215	27.0887	27.1893	27.2362	27.3633	27.4102	0.76	26.3215	27.0887	27.1893	27.497	27.497	27.3834		0.76	25.5691	26.8672	26.497	26.6722	27.3098	0.76	25.8951	27.015	26.5981	27.2228	27.1759	0.76	25.8951	27.015	26.6789	27.0418	27.2362	27.5972	0.76	25.8951	27.015	26.6789	27.2094	26.8672	27.1424	27.4503	0.76	25.9697
0.8	26.4093	27.2362	26.9478	27.3232	27.497	0.8	26.3553	27.1424	27.3232	27.4168	27.3031	27.4035	0.8	26.3553	27.1424	27.3232	27.5505	27.5505	27.4035		0.8	25.6099	27.0015	26.5442	26.6789	27.3299	0.8	25.8815	27.1491	26.625	27.2496	27.2295	0.8	25.8815	27.1491	26.6654	27.0485	27.2764	27.5571	0.8	25.8815	27.1491	26.6654	27.2295	26.8	27.1156	27.497	0.8	26.0713
0.84	26.5172	27.2362	26.9545	27.3366	27.5505	0.84	26.3147	27.263	27.4035	27.4636	27.3767	27.4102	0.84	26.3147	27.263	27.4035	27.5705	27.5104	27.5171		0.84	25.5963	27.0619	26.6587	26.6991	27.2362	0.84	25.8341	27.1491	26.6789	27.3433	27.2094	0.84	25.8341	27.1491	26.6856	27.0552	27.2161	27.5772	0.84	25.8341	27.1491	26.6856	27.3299	26.8605	27.1558	27.5505	0.84	26.0645
0.88	26.5779	27.196	27.0351	27.3567	27.6039	0.88	26.3485	27.283	27.4703	27.4904	27.4235	27.4235	0.88	26.3485	27.283	27.4703	27.5772	27.5505	27.5772		0.88	25.6235	27.1491	26.652	26.6789	27.2295	0.88	25.8612	27.2027	26.7731	27.35	27.1826	0.88	25.8612	27.2027	26.7193	27.0955	27.2697	27.5972	0.88	25.8612	27.2027	26.7193	27.3834	26.8538	27.2295	27.5238	0.88	26.0645
0.92	26.5846	27.1692	27.0485	27.3567	27.5638	0.92	26.389	27.3299	27.5839	27.5839	27.4369	27.5238	0.92	26.389	27.3299	27.5839	27.7573	27.5705	27.5438		0.92	25.6711	27.1893	26.652	26.8067	27.2563	0.92	25.9154	27.1893	26.8672	27.35	27.1558	0.92	25.9154	27.1893	26.8739	27.1826	27.3299	27.5972	0.92	25.9154	27.1893	26.8739	27.4235	26.9142	27.2161	27.5371	0.92	26.0848
0.96	26.6856	27.263	27.082	27.3968	27.5705	0.96	26.5913	27.3767	27.7106	27.5905	27.6039	27.5238	0.96	26.5913	27.3767	27.7106	27.6973	27.6105	27.6506		0.96	25.6915	27.263	26.8	26.8403	27.2697	0.96	26.0036	27.4369	26.921	27.4436	27.2697	0.96	26.0036	27.4369	26.9613	27.3165	27.3567	27.5571	0.96	26.0036	27.4369	26.9613	27.5972	26.9948	27.3098	27.6105	0.96	26.1931
1	26.7125	27.2964	27.3299	27.4035	27.6105	1	26.6385	27.3968	27.7439	27.7906	27.5638	27.5705	1	26.6385	27.3968	27.7439	27.7573	27.5304	27.5772		1	25.7118	27.4369	26.7933	26.8807	27.4369	1	25.929	27.4035	26.9948	27.4035	27.2496	1	25.929	27.4035	26.8941	27.3767	27.4168	27.5839	1	25.929	27.4035	26.8941	27.4837	26.968	27.3567	27.6639	1	26.1187
1.04	26.7462	27.263	27.2563	27.4569	27.6906	1.04	26.6318	27.4904	27.7773	27.7439	27.5972	27.5505	1.04	26.6318	27.4904	27.7773	27.8638	27.5705	27.5905		1.04	25.6167	27.3968	26.8067	26.8941	27.4102	1.04	25.9629	27.4436	27.0351	27.3633	27.3165	1.04	25.9629	27.4436	26.9142	27.5238	27.3232	27.5839	1.04	25.9629	27.4436	26.9142	27.5171	26.921	27.4569	27.6239	1.04	26.139
1.08	26.7664	27.3165	27.2563	27.4503	27.7972	1.08	26.6318	27.5972	27.9237	27.7439	27.7106	27.5505	1.08	26.6318	27.5972	27.9237	27.8905	27.6306	27.6172		1.08	25.6235	27.497	26.8269	26.8941	27.4904	1.08	26.0307	27.4904	27.015	27.4503	27.2964	1.08	26.0307	27.4904	27.0418	27.5037	27.2897	27.6973	1.08	26.0307	27.4904	27.0418	27.6105	26.9277	27.4703	27.7039	1.08	26.2201
1.12	26.8202	27.3834	27.3031	27.4569	27.7906	1.12	26.6924	27.6973	27.9703	27.7173	27.6639	27.6172	1.12	26.6924	27.6973	27.9703	27.9703	27.6306	27.6306		1.12	25.6371	27.5839	26.8739	27.0082	27.477	1.12	26.1051	27.497	27.0485	27.4436	27.3433	1.12	26.1051	27.497	27.0753	27.5438	27.4168	27.7039	1.12	26.1051	27.497	27.0753	27.5905	26.9545	27.4569	27.7706	1.12	26.4363
1.16	26.8269	27.4703	27.3232	27.4569	27.8039	1.16	26.7125	27.7373	27.9969	27.7306	27.7373	27.7239	1.16	26.7125	27.7373	27.9969	27.977	27.8305	27.7373		1.16	25.6439	27.6372	27.082	27.0015	27.5371	1.16	26.0916	27.6439	27.1759	27.4904	27.4102	1.16	26.0916	27.6439	27.0686	27.6706	27.4636	27.7639	1.16	26.0916	27.6439	27.0686	27.5905	27.0015	27.5571	27.7839	1.16	26.4632
1.2	26.8739	27.477	27.3433	27.5505	27.8239	1.2	26.8336	27.7839	28.1033	27.7706	27.7506	27.8239	1.2	26.8336	27.7839	28.1033	27.9969	27.7839	27.7173		1.2	25.6575	27.6372	27.0418	27.0753	27.5705	1.2	26.1254	27.6906	27.1893	27.5571	27.4102	1.2	26.1254	27.6906	27.1759	27.6105	27.5638	27.7906	1.2	26.1254	27.6906	27.1759	27.6039	27.0485	27.5037	27.8239	1.2	26.3958
1.24	26.8471	27.497	27.37	27.5705	27.8505	1.24	26.8202	27.8505	28.1232	27.8172	27.7906	27.8838	1.24	26.8202	27.8505	28.1232	28.09	27.7906	27.7773		1.24	25.7662	27.6706	27.0351	27.129	27.5571	1.24	26.1457	27.7039	27.2697	27.6239	27.5104	1.24	26.1457	27.7039	27.2094	27.6239	27.5505	27.8572	1.24	26.1457	27.7039	27.2094	27.7706	27.1156	27.6506	27.8106	1.24	26.47
1.28	26.8605	27.5037	27.3633	27.5772	27.8638	1.28	26.8471	27.9504	28.2626	27.9038	27.7906	27.8705	1.28	26.8471	27.9504	28.2626	28.1099	27.7573	27.8372		1.28	25.7186	27.7573	27.082	27.1022	27.5772	1.28	26.1593	27.7306	27.3165	27.6839	27.4503	1.28	26.1593	27.7306	27.2362	27.6105	27.6239	27.8305	1.28	26.1593	27.7306	27.2362	27.7239	27.1491	27.6506	27.8106	1.28	26.416
1.32	26.9814	27.5238	27.3901	27.6506	27.8372	1.32	26.9478	27.9969	28.3355	28.0634	27.8305	27.8305	1.32	26.9478	27.9969	28.3355	28.2427	27.8905	27.8239		1.32	25.7526	27.7439	27.0686	27.1022	27.6039	1.32	26.1796	27.8705	27.3031	27.7039	27.4503	1.32	26.1796	27.8705	27.2563	27.6773	27.6306	27.8638	1.32	26.1796	27.8705	27.2563	27.7173	27.1625	27.6573	27.8106	1.32	26.4632
1.36	27.0082	27.5438	27.477	27.6439	27.9437	1.36	26.8672	28.1431	28.3687	28.1497	27.8039	27.9637	1.36	26.8672	28.1431	28.3687	28.3024	27.8905	27.8838		1.36	25.6711	27.8172	27.1022	27.0955	27.6372	1.36	26.389	27.8372	27.3968	27.7106	27.6039	1.36	26.389	27.8372	27.2964	27.7106	27.6573	27.8039	1.36	26.389	27.8372	27.2964	27.7439	27.1893	27.6506	27.9038	1.36	26.497
1.4	27.0351	27.5772	27.4436	27.5905	27.9504	1.4	26.9075	28.1232	28.4084	28.1232	27.9237	27.9504	1.4	26.9075	28.1232	28.4084	28.309	27.8838	27.9437		1.4	25.6779	27.8705	27.1558	27.0955	27.6973	1.4	26.3553	27.9371	27.4035	27.6973	27.6172	1.4	26.3553	27.9371	27.2964	27.8106	27.7506	27.8638	1.4	26.3553	27.9371	27.2964	27.7506	27.2027	27.6039	27.9504	1.4	26.5105
1.44	27.1491	27.6306	27.477	27.7173	27.9504	1.44	26.8672	28.1697	28.4812	28.1365	27.9437	28.0368	1.44	26.8672	28.1697	28.4812	28.3819	27.9237	27.9504		1.44	25.8001	27.9038	27.1826	27.0619	27.6973	1.44	26.3485	27.977	27.4503	27.7906	27.6506	1.44	26.3485	27.977	27.35	27.8772	27.8039	27.7972	1.44	26.3485	27.977	27.35	27.8372	27.2362	27.8572	27.8439	1.44	26.5509
1.52	27.1156	27.6306	27.5104	27.7706	27.9371	1.52	26.9277	28.2095	28.5143	28.0833	27.9504	28.0235	1.52	26.9277	28.2095	28.5143	28.3687	27.9504	27.957		1.52	25.8069	27.8905	27.2094	27.0887	27.7173	1.52	26.3418	28.0235	27.4035	27.7573	27.5905	1.52	26.3418	28.0235	27.4168	27.8838	27.7573	27.8572	1.52	26.3418	28.0235	27.4168	27.8638	27.2897	27.8505	27.9703	1.52	26.652
1.56	27.082	27.6573	27.5037	27.6839	27.9504	1.56	26.9948	28.1896	28.5805	28.163	28.0235	27.9903	1.56	26.9948	28.1896	28.5805	28.4349	27.9836	27.9171		1.56	25.7458	27.9237	27.2429	27.2228	27.6973	1.56	26.389	28.0368	27.5171	27.7972	27.6105	1.56	26.389	28.0368	27.4302	27.9038	27.8039	27.8505	1.56	26.389	28.0368	27.4302	27.9104	27.2964	27.9237	27.957	1.56	26.6654
1.6	27.129	27.7306	27.5705	27.8572	27.9903	1.6	26.9948	28.309	28.6532	28.2891	28.0833	28.0102	1.6	26.9948	28.309	28.6532	28.4349	27.9903	27.9969		1.6	25.7594	28.0634	27.2697	27.35	27.7173	1.6	26.4498	28.0634	27.5371	27.8239	27.6639	1.6	26.4498	28.0634	27.4636	27.9304	27.7906	27.8172	1.6	26.4498	28.0634	27.4636	27.9171	27.2897	27.9038	27.957	1.6	26.7731
1.64	27.129	27.7639	27.6306	27.8505	27.9969	1.64	27.0351	28.4548	28.6929	28.2758	28.1099	28.0102	1.64	27.0351	28.4548	28.6929	28.4349	28.0169	27.977		1.64	25.8137	28.236	27.3031	27.2697	27.7039	1.64	26.4025	28.0767	27.5972	27.8705	27.7972	1.64	26.4025	28.0767	27.4636	28.0169	27.7839	27.977	1.64	26.4025	28.0767	27.4636	28.0235	27.3098	27.8772	27.8971	1.64	26.7933
1.68	27.2897	27.7906	27.6506	27.8638	28.0169	1.68	27.1424	28.4415	28.7721	28.2493	28.2294	27.9969	1.68	27.1424	28.4415	28.7721	28.4283	28.0634	28.1232		1.68	25.8612	28.2559	27.3031	27.3299	27.7573	1.68	26.4632	28.0567	27.5972	27.8971	27.7706	1.68	26.4632	28.0567	27.477	27.9903	27.7972	27.9237	1.68	26.4632	28.0567	27.477	28.0235	27.3165	27.8572	28.0634	1.68	26.6991
1.72	27.3901	27.7639	27.6239	27.9237	28.0435	1.72	27.1491	28.4879	28.7985	28.468	28.0767	27.9836	1.72	27.1491	28.4879	28.7985	28.5871	28.1431	28.0767		1.72	25.8544	28.2559	27.35	27.2362	27.7573	1.72	26.5105	28.1033	27.6506	27.9504	27.7706	1.72	26.5105	28.1033	27.5571	28.0302	27.8505	28.07	1.72	26.5105	28.1033	27.5571	28.0235	27.35	27.8372	28.0567	1.72	26.8134
1.76	27.4369	27.7039	27.6773	27.8838	27.9836	1.76	27.2362	28.4945	28.8975	28.4614	28.1099	28.0435	1.76	27.2362	28.4945	28.8975	28.5871	28.1564	28.0235		1.76	25.8205	28.3355	27.3901	27.2295	27.7573	1.76	26.5913	28.1962	27.6306	27.9304	27.7573	1.76	26.5913	28.1962	27.6039	28.0634	27.8372	28.0368	1.76	26.5913	28.1962	27.6039	28.0235	27.3433	27.8439	27.9637	1.76	26.8134
1.8	27.5571	27.7506	27.7239	27.9237	28.0634	1.8	27.2563	28.5408	29.0095	28.4217	28.0966	28.1896	1.8	27.2563	28.5408	29.0095	28.64	28.2161	28.0102		1.8	25.868	28.3952	27.4168	27.3834	27.7639	1.8	26.6115	28.2427	27.7573	27.9969	27.7906	1.8	26.6115	28.2427	27.6706	28.0567	27.8372	28.0435	1.8	26.6115	28.2427	27.6706	28.0966	27.4168	27.9504	28.09	1.8	26.8941
1.84	27.5171	27.8505	27.8106	27.9304	28.09	1.84	27.3901	28.6003	29.0293	28.4217	28.1365	28.2891	1.84	27.3901	28.6003	29.0293	28.6664	28.2692	27.9969		1.84	25.868	28.4481	27.5104	27.3901	27.8239	1.84	26.6115	28.2559	27.8239	28.0235	27.8106	1.84	26.6115	28.2559	27.6839	28.07	27.8572	28.0634	1.84	26.6115	28.2559	27.6839	28.0833	27.4503	27.8705	28.1099	1.84	26.8739
1.88	27.5638	27.9703	27.8239	28.0036	28.0833	1.88	27.3968	28.6598	28.9832	28.4018	28.1763	28.2493	1.88	27.3968	28.6598	28.9832	28.7127	28.4481	28.0169		1.88	25.8476	28.3952	27.5171	27.3567	27.9038	1.88	26.6183	28.309	27.8905	28.1033	27.7639	1.88	26.6183	28.309	27.7306	28.1365	27.8705	28.0833	1.88	26.6183	28.309	27.7306	28.1564	27.5104	28.0102	28.0567	1.88	26.8874
1.92	27.6239	27.9304	27.8372	28.0767	28.1165	1.92	27.3834	28.6863	29.1017	28.6334	28.2161	28.2692	1.92	27.3834	28.6863	29.1017	28.6995	28.4614	28.1962		1.92	25.8951	28.521	27.6105	27.3834	27.8439	1.92	26.6318	28.3024	27.8705	28.1099	27.7972	1.92	26.6318	28.3024	27.6839	28.2228	27.9437	28.1298	1.92	26.6318	28.3024	27.6839	28.1697	27.5505	28.0036	28.0767	1.92	26.8807
1.96	27.6439	27.9969	27.8838	28.1033	28.2029	1.96	27.477	28.8975	29.1807	28.521	28.2626	28.2161	1.96	27.477	28.8975	29.1807	28.7193	28.3024	28.1497		1.96	25.8951	28.5474	27.5638	27.4168	27.9437	1.96	26.6115	28.3819	27.9437	28.07	27.8372	1.96	26.6115	28.3819	27.8305	28.2161	27.957	28.1896	1.96	26.6115	28.3819	27.8305	28.163	27.5171	28.0102	28.1232	1.96	26.9478
2	27.6372	28.0235	27.8905	28.0767	28.2294	2	27.497	28.8513	29.207	28.5607	28.2427	28.3223	2	27.497	28.8513	29.207	28.8249	28.362	28.3024		2	25.8815	28.5607	27.5905	27.4636	27.9903	2	26.6654	28.3819	27.9637	28.1165	27.8638	2	26.6654	28.3819	27.8572	28.2758	28.09	28.163	2	26.6654	28.3819	27.8572	28.2029	27.5705	28.0767	28.1896	2	26.968
2.04	27.6573	28.0368	27.977	28.1365	28.2957	2.04	27.5037	28.8711	29.2793	28.5937	28.3421	28.362	2.04	27.5037	28.8711	29.2793	28.8579	28.3753	28.236		2.04	25.9087	28.5871	27.6639	27.4168	28.0501	2.04	26.8134	28.4349	28.0102	28.09	27.8971	2.04	26.8134	28.4349	27.9437	28.2758	28.1298	28.09	2.04	26.8134	28.4349	27.9437	28.2228	27.5972	28.1033	28.2692	2.04	27.0217
2.08	27.7039	28.0634	27.9371	28.1033	28.2692	2.08	27.5705	28.9766	29.3121	28.6003	28.362	28.3885	2.08	27.5705	28.9766	29.3121	29.0425	28.362	28.236		2.08	25.9426	28.6069	27.6773	27.5171	28.0634	2.08	26.7865	28.4879	28.0102	28.1298	27.8838	2.08	26.7865	28.4879	27.977	28.2957	28.0567	28.236	2.08	26.7865	28.4879	27.977	28.2891	27.6573	28.09	28.3156	2.08	27.0418
2.12	27.7039	28.0833	27.9504	28.0966	28.3024	2.12	27.6039	28.9766	29.3778	28.7193	28.415	28.4217	2.12	27.6039	28.9766	29.3778	29.0491	28.3488	28.2228		2.12	25.9697	28.8447	27.6706	27.5371	28.0368	2.12	26.8	28.5607	28.0966	28.1431	27.957	2.12	26.8	28.5607	27.9969	28.3421	28.1298	28.2228	2.12	26.8	28.5607	27.9969	28.2825	27.6773	28.1697	28.362	2.12	27.0284
2.16	27.8106	28.07	28.0435	28.1165	28.3024	2.16	27.5571	28.9766	29.5287	28.8051	28.4812	28.4018	2.16	27.5571	28.9766	29.5287	29.0754	28.3885	28.2095		2.16	25.9493	28.8249	27.6506	27.5304	28.0235	2.16	26.8134	28.5474	28.1497	28.1697	27.9903	2.16	26.8134	28.5474	28.0169	28.3421	28.1033	28.1763	2.16	26.8134	28.5474	28.0169	28.3156	27.6172	28.2029	28.4614	2.16	27.0686
2.2	27.7906	28.0501	28.0435	28.1165	28.3753	2.2	27.5104	28.9832	29.5484	28.7985	28.673	28.4018	2.2	27.5104	28.9832	29.5484	29.0359	28.5408	28.2758		2.2	26.0103	28.8183	27.8106	27.6306	27.9969	2.2	26.9142	28.5342	28.1298	28.1962	28.0169	2.2	26.9142	28.5342	28.0102	28.415	28.2493	28.2294	2.2	26.9142	28.5342	28.0102	28.4283	27.7039	28.2029	28.4481	2.2	27.1223
2.24	27.7839	28.1829	28.0169	28.1431	28.309	2.24	27.6105	29.0293	29.5681	28.8051	28.6466	28.4415	2.24	27.6105	29.0293	29.5681	29.1544	28.6136	28.3355		2.24	26.0374	28.8381	27.7439	27.6306	27.9969	2.24	26.8538	28.5871	28.1431	28.3223	28.0235	2.24	26.8538	28.5871	28.0169	28.5011	28.1962	28.2626	2.24	26.8538	28.5871	28.0169	28.362	27.6906	28.2692	28.4018	2.24	27.1156
2.28	27.8905	28.2493	28.0767	28.163	28.309	2.28	27.6973	29.1544	29.6074	28.8579	28.6466	28.4349	2.28	27.6973	29.1544	29.6074	29.2136	28.6069	28.309		2.28	26.051	28.97	27.7506	27.6105	27.9969	2.28	27.0082	28.6202	28.2228	28.2957	28.0235	2.28	27.0082	28.6202	28.0501	28.4945	28.1829	28.2626	2.28	27.0082	28.6202	28.0501	28.4084	27.7439	28.3952	28.4084	2.28	27.1156
2.32	27.9237	28.2626	28.0501	28.236	28.3223	2.32	27.8439	29.2859	29.6401	28.8777	28.64	28.4283	2.32	27.8439	29.2859	29.6401	29.2136	28.6003	28.415		2.32	26.0239	29.0886	27.8172	27.6639	28.0368	2.32	26.8471	28.6598	28.2427	28.2891	28.0169	2.32	26.8471	28.6598	28.0966	28.5011	28.2161	28.415	2.32	26.8471	28.6598	28.0966	28.3952	27.7439	28.3223	28.4812	2.32	27.2027
2.4	28.0235	28.2758	28.1298	28.2294	28.3156	2.4	27.9038	29.253	29.6663	28.9041	28.6003	28.4084	2.4	27.9038	29.253	29.6663	29.0886	28.5739	28.5143		2.4	26.2201	28.9502	27.7306	27.7306	28.07	2.4	26.9478	28.6598	28.2294	28.3355	28.0302	2.4	26.9478	28.6598	28.0833	28.554	28.2228	28.4746	2.4	26.9478	28.6598	28.0833	28.4746	27.7706	28.2825	28.4879	2.4	27.2161
2.44	27.9836	28.2825	28.1497	28.2891	28.3488	2.44	27.8971	29.2727	29.6532	28.9173	28.6995	28.4217	2.44	27.8971	29.2727	29.6532	29.1083	28.6003	28.4746		2.44	26.1796	28.9305	27.7839	27.7039	28.1829	2.44	26.9881	28.6929	28.2692	28.3421	28.1232	2.44	26.9881	28.6929	28.1099	28.5408	28.2228	28.4084	2.44	26.9881	28.6929	28.1099	28.4614	27.7173	28.2957	28.5143	2.44	27.2496
2.48	27.9969	28.3488	28.1298	28.2692	28.3952	2.48	27.8705	29.3187	29.7449	28.8843	28.7853	28.4879	2.48	27.8705	29.3187	29.7449	29.2727	28.5937	28.4879		2.48	26.1525	28.9634	27.7972	27.7373	28.163	2.48	26.9411	28.6334	28.2427	28.3554	28.1033	2.48	26.9411	28.6334	28.163	28.5474	28.2758	28.3753	2.48	26.9411	28.6334	28.163	28.4945	27.7039	28.3223	28.521	2.48	27.3165
2.52	28.0368	28.415	28.1365	28.3289	28.4481	2.52	27.8971	29.3647	29.7972	28.8909	28.7853	28.5011	2.52	27.8971	29.3647	29.7972	29.3975	28.6136	28.5011		2.52	26.0713	29.0556	27.8305	27.7306	28.1829	2.52	26.9613	28.7721	28.3024	28.4217	28.1165	2.52	26.9613	28.7721	28.2029	28.5607	28.2825	28.3885	2.52	26.9613	28.7721	28.2029	28.4945	27.7639	28.4084	28.5474	2.52	27.3767
2.56	28.0567	28.415	28.2626	28.362	28.4945	2.56	27.9171	29.5025	29.8234	29.0227	28.7457	28.5474	2.56	27.9171	29.5025	29.8234	29.3844	28.6202	28.6003		2.56	26.139	29.0688	27.9371	27.7706	28.2294	2.56	27.0284	28.7589	28.3488	28.4548	28.1165	2.56	27.0284	28.7589	28.2095	28.6069	28.2957	28.4084	2.56	27.0284	28.7589	28.2095	28.521	27.8039	28.3952	28.521	2.56	27.4168
2.6	28.1497	28.4614	28.2758	28.3819	28.4945	2.6	27.9038	29.5025	29.856	28.9964	28.8051	28.5673	2.6	27.9038	29.5025	29.856	29.3778	28.7061	28.554		2.6	26.1187	29.1149	27.9903	27.7972	28.2758	2.6	26.9142	28.7523	28.4614	28.4812	28.0966	2.6	26.9142	28.7523	28.3421	28.6069	28.3355	28.4879	2.6	26.9142	28.7523	28.3421	28.5474	27.7839	28.4614	28.5408	2.6	27.4436
2.64	28.1763	28.5342	28.2957	28.4018	28.468	2.64	27.8638	29.5287	29.8626	28.9898	28.7787	28.673	2.64	27.8638	29.5287	29.8626	29.3713	28.673	28.5077		2.64	26.2539	29.1675	27.9504	27.8638	28.2825	2.64	27.0015	28.8579	28.521	28.4879	28.1697	2.64	27.0015	28.8579	28.3687	28.7523	28.3355	28.4415	2.64	27.0015	28.8579	28.3687	28.5607	27.7906	28.4349	28.5805	2.64	27.5438
2.68	28.2228	28.5011	28.2758	28.468	28.5871	2.68	27.9371	29.5746	29.9083	29.0491	28.8645	28.7391	2.68	27.9371	29.5746	29.9083	29.4369	28.7919	28.6334		2.68	26.1796	29.1412	27.9836	27.8638	28.2427	2.68	27.0955	28.8777	28.5739	28.5143	28.1697	2.68	27.0955	28.8777	28.5342	28.7787	28.3885	28.4548	2.68	27.0955	28.8777	28.5342	28.5474	27.9504	28.554	28.6797	2.68	27.6039
2.72	28.2493	28.5011	28.3024	28.4548	28.5673	2.72	28.0368	29.6467	30.0911	28.9964	28.9964	28.7655	2.72	28.0368	29.6467	30.0911	29.4303	28.8117	28.5937		2.72	26.1187	29.1938	28.1896	27.8505	28.3488	2.72	27.0485	28.9371	28.6532	28.4812	28.2029	2.72	27.0485	28.9371	28.5143	28.6598	28.4548	28.6334	2.72	27.0485	28.9371	28.5143	28.5739	27.9903	28.6003	28.6664	2.72	27.5638
2.76	28.2692	28.5607	28.5077	28.4945	28.6466	2.76	28.0833	29.7318	30.1889	29.0425	28.9832	28.7127	2.76	28.0833	29.7318	30.1889	29.4369	28.8447	28.5871		2.76	26.166	29.2793	28.1099	27.8772	28.3421	2.76	27.0619	28.97	28.6598	28.4945	28.2559	2.76	27.0619	28.97	28.5011	28.6929	28.4879	28.6598	2.76	27.0619	28.97	28.5011	28.6136	28.0767	28.6532	28.7193	2.76	27.6105
2.8	28.2891	28.5871	28.5077	28.5077	28.6466	2.8	28.1829	29.6729	30.215	29.082	28.9107	28.8051	2.8	28.1829	29.6729	30.215	29.4631	28.9173	28.5607		2.8	26.2607	29.253	28.1431	27.8572	28.3885	2.8	27.1558	28.9239	28.7127	28.6069	28.309	2.8	27.1558	28.9239	28.6598	28.7721	28.4481	28.6664	2.8	27.1558	28.9239	28.6598	28.7061	28.0302	28.6334	28.7193	2.8	27.5905
2.84	28.362	28.6268	28.4945	28.5011	28.6664	2.84	28.163	29.7449	30.241	29.1938	28.9041	28.7787	2.84	28.163	29.7449	30.241	29.5287	28.9832	28.6202		2.84	26.1998	29.3581	28.2095	27.8439	28.3952	2.84	27.1625	28.97	28.6863	28.5871	28.2825	2.84	27.1625	28.97	28.6664	28.7919	28.4812	28.6664	2.84	27.1625	28.97	28.6664	28.7391	28.09	28.7391	28.7325	2.84	27.6239
2.88	28.362	28.6268	28.4879	28.4945	28.7061	2.88	28.1962	29.6991	30.3387	29.1609	28.9305	28.8117	2.88	28.1962	29.6991	30.3387	29.5877	29.0161	28.6929		2.88	26.1593	29.3647	28.1829	27.8505	28.415	2.88	27.1424	29.0622	28.7061	28.6069	28.3488	2.88	27.1424	29.0622	28.6995	28.8711	28.554	28.64	2.88	27.1424	29.0622	28.6995	28.7457	28.0966	28.7985	28.7061	2.88	27.6105
2.92	28.3687	28.6466	28.5871	28.5673	28.7127	2.92	28.2228	29.8626	30.2931	29.1873	28.9568	28.8381	2.92	28.2228	29.8626	30.2931	29.5615	28.8777	28.6466		2.92	26.1525	29.3713	28.1697	27.8305	28.4349	2.92	27.1759	29.2201	28.7061	28.64	28.362	2.92	27.1759	29.2201	28.7061	28.9436	28.554	28.6268	2.92	27.1759	29.2201	28.7061	28.8777	28.0833	28.7853	28.673	2.92	27.6706
2.96	28.2427	28.6664	28.5805	28.554	28.8117	2.96	28.236	29.8495	30.2996	29.1873	28.9173	28.8315	2.96	28.236	29.8495	30.2996	29.5812	28.9634	28.6929		2.96	26.1457	29.345	28.1896	27.9104	28.4548	2.96	27.1089	29.2464	28.7589	28.6268	28.4548	2.96	27.1089	29.2464	28.7391	28.9634	28.5937	28.6334	2.96	27.1089	29.2464	28.7391	28.8579	28.0634	28.7523	28.7457	2.96	27.7106
3	28.4084	28.6863	28.5871	28.5937	28.8051	3	28.2692	29.8364	30.3452	29.2136	29.0688	28.8843	3	28.2692	29.8364	30.3452	29.6532	28.9832	28.673		3	26.1931	29.3713	28.2161	27.8971	28.4217	3	27.1089	29.2464	28.8051	28.6664	28.4812	3	27.1089	29.2464	28.7193	28.9568	28.6069	28.6136	3	27.1089	29.2464	28.7193	28.8381	28.1298	28.7127	28.8117	3	27.7373
3.04	28.5276	28.6598	28.5871	28.6268	28.8183	3.04	28.2825	30.065	30.3192	29.2464	29.0425	28.8909	3.04	28.2825	30.065	30.3192	29.6663	29.0622	28.7457		3.04	26.1931	29.4238	28.2891	28.0036	28.4879	3.04	27.129	29.3121	28.7721	28.673	28.468	3.04	27.129	29.3121	28.7325	28.9436	28.673	28.7457	3.04	27.129	29.3121	28.7325	28.8579	28.1564	28.64	28.7919	3.04	27.7839
3.08	28.5276	28.7985	28.5673	28.6598	28.8843	3.08	28.2228	30.0128	30.3777	29.1675	29.0491	28.9371	3.08	28.2228	30.0128	30.3777	29.6729	29.0951	28.7655		3.08	26.2134	29.3844	28.3421	27.9237	28.4614	3.08	27.1625	29.2727	28.8777	28.7259	28.5739	3.08	27.1625	29.2727	28.6532	28.9502	28.6863	28.8711	3.08	27.1625	29.2727	28.6532	28.9964	28.2029	28.8381	28.7721	3.08	27.7573
3.12	28.5871	28.7391	28.6268	28.6598	28.8909	3.12	28.309	29.9998	30.4038	29.2596	29.1149	28.9502	3.12	28.309	29.9998	30.4038	29.686	29.0754	28.8843		3.12	26.1254	29.4894	28.309	28.0169	28.5077	3.12	27.196	29.1412	28.8645	28.6995	28.5342	3.12	27.196	29.1412	28.7589	28.9568	28.7127	28.8777	3.12	27.196	29.1412	28.7589	28.9766	28.2029	28.8117	28.8447	3.12	27.8172
3.16	28.5673	28.7523	28.7985	28.6929	28.8513	3.16	28.3554	30.0259	30.4493	29.4041	29.1346	28.9832	3.16	28.3554	30.0259	30.4493	29.7121	29.0886	28.8249		3.16	26.1593	29.5091	28.309	28.0567	28.5408	3.16	27.3031	29.1807	28.8579	28.7127	28.5673	3.16	27.3031	29.1807	28.7787	28.9766	28.673	28.9107	3.16	27.3031	29.1807	28.7787	28.9964	28.1896	28.8513	28.8711	3.16	27.9304
3.2	28.5871	28.7985	28.6664	28.7853	28.9832	3.2	28.415	30.065	30.5078	29.4369	29.1741	28.9766	3.2	28.415	30.065	30.5078	29.7318	29.0556	28.8249		3.2	26.2066	29.5353	28.3952	28.0767	28.5276	3.2	27.2897	29.2399	28.8447	28.7259	28.5871	3.2	27.2897	29.2399	28.8051	29.0688	28.8183	28.9107	3.2	27.2897	29.2399	28.8051	29.1017	28.3355	28.8645	28.9239	3.2	27.7906
3.28	28.7787	28.7919	28.7325	28.7721	28.9832	3.28	28.3819	30.0454	30.5273	29.4631	29.1478	29.0425	3.28	28.3819	30.0454	30.5273	29.7449	29.1149	28.8711		3.28	26.2337	29.6139	28.4548	27.9836	28.5077	3.28	27.2897	29.3778	28.8777	28.7391	28.6268	3.28	27.2897	29.3778	28.8645	29.0688	28.7985	29.0227	3.28	27.2897	29.3778	28.8645	28.9173	28.3289	28.9041	28.9239	3.28	27.8505
3.32	28.6995	28.7919	28.6929	28.7721	28.9832	3.32	28.4018	30.0911	30.5208	29.4303	29.1478	29.0293	3.32	28.4018	30.0911	30.5208	29.856	29.1149	28.8579		3.32	26.281	29.627	28.4415	28.1763	28.521	3.32	27.2094	29.4763	29.0227	28.8579	28.5871	3.32	27.2094	29.4763	28.9041	29.0951	28.7589	28.9436	3.32	27.2094	29.4763	28.9041	28.9305	28.2493	28.8777	28.9305	3.32	27.8372
3.36	28.673	28.8975	28.7391	28.7523	28.97	3.36	28.4481	30.1042	30.5468	29.4631	29.1675	29.1281	3.36	28.4481	30.1042	30.5468	29.8299	29.1017	28.9173		3.36	26.2472	29.686	28.4614	28.1829	28.6334	3.36	27.2563	29.4435	29.003	28.8447	28.6995	3.36	27.2563	29.4435	28.9436	29.1083	28.7985	28.9436	3.36	27.2563	29.4435	28.9436	29.0359	28.2626	28.9305	28.9964	3.36	27.9038
3.4	28.7589	28.9634	28.8579	28.8711	28.9832	3.4	28.4415	30.3192	30.6441	29.45	29.2399	29.0754	3.4	28.4415	30.3192	30.6441	29.8234	29.1281	28.8909		3.4	26.2269	29.686	28.5011	28.2029	28.6466	3.4	27.4035	29.3581	29.1215	28.8447	28.6995	3.4	27.4035	29.3581	29.0161	29.2136	28.7721	28.9371	3.4	27.4035	29.3581	29.0161	29.0754	28.3223	28.9239	29.0293	3.4	27.8705
3.44	28.7193	29.003	28.8513	28.8711	28.97	3.44	28.4349	30.3322	30.6441	29.4894	29.3384	29.1675	3.44	28.4349	30.3322	30.6441	29.8953	29.2201	28.9305		3.44	26.362	29.7776	28.4614	28.2427	28.673	3.44	27.3901	29.345	29.1412	28.8777	28.7259	3.44	27.3901	29.345	29.003	29.0754	28.7919	28.9832	3.44	27.3901	29.345	29.003	29.0227	28.4018	28.9766	28.9502	3.44	27.9437
3.48	28.8315	28.9766	28.8645	28.8777	29.0425	3.48	28.4415	30.2345	30.6571	29.5484	29.3121	29.1412	3.48	28.4415	30.2345	30.6571	29.8495	29.2136	28.9766		3.48	26.3553	29.7449	28.4548	28.236	28.7061	3.48	27.5505	29.4041	29.0886	28.8975	28.7127	3.48	27.5505	29.4041	29.003	29.0951	28.8381	29.0293	3.48	27.5505	29.4041	29.003	28.9634	28.4349	28.9436	28.97	3.48	27.9237
3.52	28.7919	29.0095	28.8843	28.8975	29.0951	3.52	28.4879	30.3062	30.8451	29.6401	29.2924	29.1675	3.52	28.4879	30.3062	30.8451	29.9932	29.1938	29.1675		3.52	26.3012	29.8168	28.6003	28.2626	28.7457	3.52	27.4102	29.4631	29.2136	28.9634	28.6069	3.52	27.4102	29.4631	29.0754	29.1544	28.8777	28.9766	3.52	27.4102	29.4631	29.0754	29.1215	28.3885	29.0161	29.1017	3.52	27.9038
3.56	28.7721	29.0293	28.9041	28.9371	29.082	3.56	28.5342	30.3387	30.8322	29.6663	29.2924	29.1807	3.56	28.5342	30.3387	30.8322	30.0128	29.1938	29.082		3.56	26.2742	29.8822	28.6202	28.2957	28.6929	3.56	27.4569	29.5353	29.1675	28.9107	28.6268	3.56	27.4569	29.5353	29.2201	29.2464	28.8513	28.9634	3.56	27.4569	29.5353	29.2201	29.0886	28.4415	29.0622	29.1544	3.56	27.8638
3.6	28.8513	29.0491	28.9305	28.9766	29.1149	3.6	28.5805	30.3517	30.7674	29.5943	29.3121	29.2859	3.6	28.5805	30.3517	30.7674	30.065	29.3253	29.0754		3.6	26.3553	29.9149	28.6268	28.3024	28.7193	3.6	27.5772	29.6532	29.2924	28.8909	28.6268	3.6	27.5772	29.6532	29.1017	29.2201	28.8645	28.9832	3.6	27.5772	29.6532	29.1017	29.1938	28.3819	29.1215	29.1675	3.6	27.9703
3.64	28.9371	29.082	28.9634	29.0359	29.0754	3.64	28.5673	30.3777	30.8905	29.6401	29.345	29.2464	3.64	28.5673	30.3777	30.8905	30.0389	29.3253	28.9832		3.64	26.3418	29.9541	28.6532	28.2626	28.6995	3.64	27.6839	29.6794	29.2201	28.9239	28.7919	3.64	27.6839	29.6794	29.1609	29.2464	28.9173	28.9964	3.64	27.6839	29.6794	29.1609	29.2136	28.4349	29.1478	29.1412	3.64	28.0102
3.68	28.9568	29.1741	28.9634	29.0227	29.1281	3.68	28.6797	30.3712	30.7933	29.8103	29.3319	29.2596	3.68	28.6797	30.3712	30.7933	30.0585	29.4435	29.0491		3.68	26.2742	29.941	28.6598	28.2692	28.8513	3.68	27.4302	29.7383	29.2464	28.9568	28.8117	3.68	27.4302	29.7383	29.2333	29.3384	28.9766	29.0227	3.68	27.4302	29.7383	29.2333	29.2267	28.4415	29.2464	29.1215	3.68	28.0634
3.72	28.9371	29.1609	28.9173	29.0293	29.0951	3.72	28.6929	30.3907	30.8063	29.8168	29.3384	29.2399	3.72	28.6929	30.3907	30.8063	30.0128	29.4106	29.0556		3.72	26.3418	30.0193	28.6929	28.3223	28.8183	3.72	27.4837	29.7449	29.2267	28.9964	28.7589	3.72	27.4837	29.7449	29.1873	29.3319	28.9964	29.003	3.72	27.4837	29.7449	29.1873	29.1938	28.4349	29.1807	29.1149	3.72	28.0634
3.76	29.003	29.1215	29.003	29.1017	29.207	3.76	28.6466	30.4103	30.8711	29.7449	29.4566	29.299	3.76	28.6466	30.4103	30.8711	30.0585	29.4172	29.0359		3.76	26.3012	30.0128	28.6929	28.3819	28.7853	3.76	27.497	29.7187	29.2399	29.0622	28.7985	3.76	27.497	29.7187	29.2464	29.4041	29.0754	29.082	3.76	27.497	29.7187	29.2464	29.1741	28.4283	29.1938	29.1346	3.76	28.0435
3.8	28.9568	29.2267	29.1412	29.1412	29.1807	3.8	28.64	30.4233	30.8775	29.686	29.4894	29.2859	3.8	28.64	30.4233	30.8775	30.0846	29.4435	28.9371		3.8	26.3553	30.0454	28.673	28.415	28.7985	3.8	27.6773	29.7187	29.3187	29.0688	28.8711	3.8	27.6773	29.7187	29.2793	29.3581	29.0161	29.1215	3.8	27.6773	29.7187	29.2793	29.3121	28.468	29.1807	29.1281	3.8	28.1165
3.84	29.1149	29.1938	29.1346	29.1938	29.2201	3.84	28.6003	30.4623	30.9746	29.6729	29.5353	29.3187	3.84	28.6003	30.4623	30.9746	30.052	29.4894	29.0886		3.84	26.3688	30.0585	28.6995	28.415	28.7787	3.84	27.6506	29.7187	29.3647	29.0886	28.9305	3.84	27.6506	29.7187	29.3253	29.4369	29.1807	29.1083	3.84	27.6506	29.7187	29.3253	29.2924	28.6136	29.2136	29.2004	3.84	28.0833
3.88	29.1281	29.2004	29.0951	29.1873	29.2399	3.88	28.6598	30.4948	31.1104	29.7514	29.686	29.3778	3.88	28.6598	30.4948	31.1104	30.1954	29.4697	29.1544		3.88	26.389	30.0454	28.673	28.3952	28.7985	3.88	27.6906	29.7383	29.3319	29.1346	28.9568	3.88	27.6906	29.7383	29.3319	29.4631	29.1873	29.1281	3.88	27.6906	29.7383	29.3319	29.3975	28.64	29.2727	29.2333	3.88	28.0966
3.92	29.1807	29.2136	29.0951	29.2464	29.2399	3.92	28.7127	30.6766	31.1169	29.8168	29.6794	29.3581	3.92	28.7127	30.6766	31.1169	30.0911	29.4763	29.2267		3.92	26.3418	30.0585	28.8513	28.5474	28.8381	3.92	27.6506	29.7907	29.4106	29.2136	29.003	3.92	27.6506	29.7907	29.4041	29.5877	29.1609	29.1938	3.92	27.6506	29.7907	29.4041	29.3778	28.6863	29.207	29.253	3.92	28.2493
3.96	29.1478	29.3056	29.1281	29.2859	29.3187	3.96	28.8447	30.7803	31.1234	29.8691	29.6401	29.3253	3.96	28.8447	30.7803	31.1234	30.0911	29.5353	29.2793		3.96	26.4093	30.0976	28.7919	28.5474	28.9436	3.96	27.8172	29.8822	29.4106	29.2267	28.9305	3.96	27.8172	29.8822	29.5091	29.5025	29.1741	29.2464	3.96	27.8172	29.8822	29.5091	29.3253	28.7061	29.299	29.2596	3.96	28.2161
4	29.2333	29.3056	29.1017	29.1873	29.3647	4	28.8447	30.8063	31.1234	29.9214	29.686	29.345	4	28.8447	30.8063	31.1234	30.2541	29.5812	29.2924		4	26.416	30.1042	28.7985	28.5143	28.9436	4	27.7972	29.9083	29.5287	29.1873	28.9239	4	27.7972	29.9083	29.5353	29.4894	29.1741	29.2399	4	27.7972	29.9083	29.5353	29.3647	28.7523	29.2859	29.253	4	28.236
4.08	29.2399	29.2464	29.1938	29.253	29.3384	4.08	28.8711	30.8581	31.1104	29.941	29.7187	29.4697	4.08	28.8711	30.8581	31.1104	30.3127	29.5877	29.1807		4.08	26.4902	30.1563	28.8249	28.4614	28.9766	4.08	27.7706	29.9606	29.4828	29.1741	29.0227	4.08	27.7706	29.9606	29.5549	29.6008	29.207	29.3319	4.08	27.7706	29.9606	29.5549	29.4238	28.7985	29.3647	29.299	4.08	28.2095
4.12	29.2267	29.345	29.2596	29.2136	29.3056	4.12	28.8909	30.884	31.1686	29.9736	29.7187	29.5549	4.12	28.8909	30.884	31.1686	30.2671	29.5353	29.2201		4.12	26.47	30.1694	28.9898	28.6136	29.003	4.12	27.8505	29.9475	29.5287	29.2201	29.0425	4.12	27.8505	29.9475	29.5746	29.5681	29.0622	29.3384	4.12	27.8505	29.9475	29.5746	29.45	28.7985	29.3975	29.2924	4.12	28.4084
4.16	29.2267	29.345	29.2662	29.299	29.3056	4.16	28.9964	30.8905	31.1815	29.9867	29.7972	29.4894	4.16	28.9964	30.8905	31.1815	30.3257	29.5287	29.253		4.16	26.497	30.1759	28.9436	28.5871	28.9766	4.16	27.9171	29.9802	29.6008	29.3187	29.1281	4.16	27.9171	29.9802	29.6074	29.5681	29.1873	29.2727	4.16	27.9171	29.9802	29.6074	29.4763	28.8315	29.45	29.3384	4.16	28.3753
4.2	29.3647	29.3384	29.2333	29.3713	29.3647	4.2	28.9832	30.9099	31.175	30.0193	29.7776	29.4828	4.2	28.9832	30.9099	31.175	30.2866	29.6205	29.2201		4.2	26.4565	30.2215	28.9436	28.6202	29.0161	4.2	27.957	29.8887	29.5681	29.2793	29.1807	4.2	27.957	29.8887	29.5287	29.6074	29.2399	29.345	4.2	27.957	29.8887	29.5287	29.4763	28.8447	29.4566	29.2924	4.2	28.3687
4.24	29.2924	29.3778	29.299	29.3778	29.3253	4.24	28.9239	30.7933	31.2396	29.9998	29.8037	29.5746	4.24	28.9239	30.7933	31.2396	30.3582	29.5353	29.3056		4.24	26.4835	30.215	28.9766	28.6069	28.9964	4.24	27.8572	29.8168	29.6205	29.3581	29.0951	4.24	27.8572	29.8168	29.5418	29.5943	29.2662	29.2924	4.24	27.8572	29.8168	29.5418	29.6205	28.7589	29.45	29.391	4.24	28.2294
4.28	29.3581	29.4631	29.3253	29.4172	29.3975	4.28	28.9371	30.9488	31.3815	30.1433	29.7841	29.6074	4.28	28.9371	30.9488	31.3815	30.3907	29.5877	29.391		4.28	26.4498	30.2606	29.0359	28.6136	29.0095	4.28	27.8838	29.9149	29.686	29.3778	29.1478	4.28	27.8838	29.9149	29.6663	29.6336	29.3319	29.299	4.28	27.8838	29.9149	29.6663	29.4894	28.8183	29.5615	29.4172	4.28	28.3952
4.32	29.4106	29.4763	29.5222	29.45	29.4369	4.32	28.9239	30.9552	31.3944	30.1172	29.7972	29.6532	4.32	28.9239	30.9552	31.3944	30.4038	29.7187	29.4106		4.32	26.5307	30.3127	29.0754	28.5739	29.0688	4.32	27.8838	30.0911	29.7056	29.3844	29.2136	4.32	27.8838	30.0911	29.6467	29.6663	29.299	29.2924	4.32	27.8838	30.0911	29.6467	29.5353	28.8447	29.6139	29.4566	4.32	28.2559
4.36	29.4697	29.5681	29.5091	29.4631	29.4238	4.36	29.0688	30.9164	31.5168	30.2215	29.856	29.6598	4.36	29.0688	30.9164	31.5168	30.4818	29.758	29.4369		4.36	26.6318	30.4948	29.0293	28.6268	29.0688	4.36	27.8838	30.1563	29.758	29.45	29.2464	4.36	27.8838	30.1563	29.8037	29.7187	29.4828	29.4238	4.36	27.8838	30.1563	29.8037	29.5615	28.7919	29.5877	29.5222	4.36	28.3687
4.4	29.5287	29.6205	29.5418	29.4041	29.5484	4.4	29.0886	30.9682	31.5233	30.1628	29.856	29.6663	4.4	29.0886	30.9682	31.5233	30.4688	29.7449	29.4828		4.4	26.6115	30.5013	29.0227	28.64	29.1412	4.4	27.8838	30.1368	29.8234	29.4894	29.2662	4.4	27.8838	30.1368	29.8234	29.7776	29.45	29.391	4.4	27.8838	30.1368	29.8234	29.5615	28.8183	29.6008	29.5222	4.4	28.4018
4.44	29.4303	29.6598	29.5681	29.5222	29.5353	4.44	29.1346	31.0717	31.5297	30.2019	29.9475	29.6532	4.44	29.1346	31.0717	31.5297	30.4753	29.771	29.5418		4.44	26.5576	30.4298	29.0622	28.8381	29.2399	4.44	27.9104	30.1302	29.8168	29.5091	29.253	4.44	27.9104	30.1302	29.8364	29.7776	29.4631	29.4631	4.44	27.9104	30.1302	29.8364	29.6401	28.8711	29.6074	29.5222	4.44	28.5673
4.48	29.5091	29.6467	29.6532	29.5615	29.5222	4.48	29.1544	31.1104	31.5168	30.1759	29.9214	29.6598	4.48	29.1544	31.1104	31.5168	30.4688	29.7907	29.5091		4.48	26.7462	30.4948	29.1544	28.8249	29.1938	4.48	27.9437	30.1107	29.8887	29.4828	29.2859	4.48	27.9437	30.1107	29.843	29.7449	29.4041	29.4763	4.48	27.9437	30.1107	29.843	29.6401	28.8909	29.6205	29.5418	4.48	28.521
4.52	29.5353	29.627	29.6139	29.6205	29.5615	4.52	29.1609	31.175	31.4911	30.2019	29.9018	29.7318	4.52	29.1609	31.175	31.4911	30.5143	29.8168	29.4631		4.52	26.625	30.5403	29.1346	28.7919	29.1938	4.52	28.07	30.1368	29.9214	29.4763	29.2596	4.52	28.07	30.1368	29.8887	29.8037	29.5287	29.5156	4.52	28.07	30.1368	29.8887	29.7187	28.9568	29.6663	29.6467	4.52	28.6003
4.56	29.6401	29.6991	29.6401	29.6467	29.5287	4.56	29.1675	31.1298	31.5168	30.2996	29.9541	29.7841	4.56	29.1675	31.1298	31.5168	30.5987	29.8887	29.4631		4.56	26.6385	30.6182	29.1346	28.8447	29.1807	4.56	28.0966	30.2215	29.9279	29.5549	29.2662	4.56	28.0966	30.2215	29.9083	29.8364	29.4959	29.5681	4.56	28.0966	30.2215	29.9083	29.6729	28.9568	29.6467	29.6401	4.56	28.5673
4.6	29.7252	29.6991	29.6205	29.6401	29.5943	4.6	29.1873	31.1363	31.5168	30.3192	30.0389	29.7907	4.6	29.1873	31.1363	31.5168	30.6506	29.7514	29.4959		4.6	26.6452	30.5727	29.1215	28.8513	29.2267	4.6	28.0235	30.241	29.9345	29.5877	29.299	4.6	28.0235	30.241	29.8953	29.8364	29.4959	29.6074	4.6	28.0235	30.241	29.8953	29.7318	29.0227	29.7383	29.6139	4.6	28.5408
4.64	29.7383	29.6991	29.6794	29.7514	29.5812	4.64	29.2859	31.1815	31.5104	30.2931	30.0128	29.7841	4.64	29.2859	31.1815	31.5104	30.6247	29.771	29.627		4.64	26.6115	30.5987	29.1412	28.8381	29.2464	4.64	28.0235	30.3127	29.9279	29.6401	29.299	4.64	28.0235	30.3127	29.941	29.8037	29.5746	29.686	4.64	28.0235	30.3127	29.941	29.7645	29.0425	29.7252	29.6401	4.64	28.6069
4.68	29.7056	29.7514	29.6991	29.6991	29.5943	4.68	29.2924	31.2009	31.6198	30.2866	30.1237	29.8168	4.68	29.2924	31.2009	31.6198	30.5792	29.8691	29.5943		4.68	26.5509	30.6636	29.207	28.8711	29.253	4.68	28.0102	30.2996	30.0193	29.6794	29.4369	4.68	28.0102	30.2996	29.9736	29.8953	29.5549	29.6663	4.68	28.0102	30.2996	29.9736	29.8495	29.0491	29.7907	29.6467	4.68	28.5607
4.72	29.6991	29.771	29.7056	29.8037	29.6794	4.72	29.299	31.2202	31.6262	30.3973	30.0715	29.8364	4.72	29.299	31.2202	31.6262	30.6377	29.8691	29.6794		4.72	26.5509	30.6636	29.3187	28.8381	29.2662	4.72	28.0235	30.2866	30.0389	29.5418	29.5025	4.72	28.0235	30.2866	30.0324	29.941	29.5222	29.5877	4.72	28.0235	30.2866	30.0324	29.8691	29.0622	29.7841	29.771	4.72	28.554
4.76	29.7972	29.7645	29.6729	29.7907	29.6794	4.76	29.2924	31.3106	31.6198	30.3127	30.1759	29.8626	4.76	29.2924	31.3106	31.6198	30.6571	29.9214	29.7056		4.76	26.6789	30.6701	29.3121	28.8711	29.2859	4.76	28.0435	30.4363	30.0259	29.6139	29.4697	4.76	28.0435	30.4363	30.0781	29.8953	29.5615	29.6205	4.76	28.0435	30.4363	30.0781	29.8757	29.1083	29.7776	29.758	4.76	28.6532
4.8	29.771	29.771	29.7383	29.7907	29.6663	4.8	29.2793	31.317	31.6584	30.2996	30.1628	29.9018	4.8	29.2793	31.317	31.6584	30.6831	29.9541	29.771		4.8	26.7125	30.6636	29.3253	28.8711	29.2662	4.8	28.0634	30.4558	30.0715	29.6139	29.5877	4.8	28.0634	30.4558	30.0781	29.9345	29.6663	29.6532	4.8	28.0634	30.4558	30.0781	29.8953	29.1215	29.8364	29.771	4.8	28.7325
4.84	29.7972	29.7776	29.7776	29.7449	29.7187	4.84	29.3975	31.3557	31.7034	30.3387	30.1368	29.941	4.84	29.3975	31.3557	31.7034	30.7025	29.9541	29.7252		4.84	26.7865	30.6571	29.3713	28.8711	29.2267	4.84	28.0634	30.3257	30.1107	29.7056	29.4959	4.84	28.0634	30.3257	30.0846	29.9998	29.7056	29.6598	4.84	28.0634	30.3257	30.0846	29.9214	29.1412	29.7514	29.6925	4.84	28.8249
4.92	29.8168	29.9018	29.6925	29.7383	29.7514	4.92	29.4238	31.3364	31.7291	30.6182	30.0911	29.9345	4.92	29.4238	31.3364	31.7291	30.6896	30.0193	29.7841		4.92	26.7865	30.6961	29.3319	28.8843	29.2596	4.92	28.1564	30.3777	30.0454	29.7187	29.5615	4.92	28.1564	30.3777	30.0454	30.0715	29.6925	29.6991	4.92	28.1564	30.3777	30.0454	29.9279	29.207	29.771	29.7383	4.92	28.7787
4.96	29.8495	29.9606	29.7187	29.8757	29.8037	4.96	29.45	31.3944	31.7098	30.5078	30.1498	30.0193	4.96	29.45	31.3944	31.7098	30.7609	29.9802	29.8037		4.96	26.7664	30.6636	29.3384	28.8975	29.3319	4.96	28.2161	30.5208	30.228	29.7449	29.5353	4.96	28.2161	30.5208	30.1694	30.1433	29.7121	29.7383	4.96	28.2161	30.5208	30.1694	29.9475	29.3844	29.7645	29.7907	4.96	28.8051
5	29.8234	29.9083	29.7645	29.9475	29.8299	5	29.3581	31.3815	31.7934	30.4103	30.1954	30.0324	5	29.3581	31.3815	31.7934	30.7803	29.9671	29.7645		5	26.7731	30.7025	29.3844	29.0491	29.4041	5	28.2957	30.4363	30.241	29.7776	29.5287	5	28.2957	30.4363	30.2085	30.1433	29.7645	29.6925	5	28.2957	30.4363	30.2085	29.9475	29.2201	29.7907	29.7776	5	28.7259
5.04	29.7972	29.9149	29.8037	29.8822	29.7907	5.04	29.4106	31.5619	31.8319	30.5338	30.2215	29.9345	5.04	29.4106	31.5619	31.8319	30.8128	30.0715	29.7841		5.04	26.8202	30.8192	29.4238	29.082	29.4106	5.04	28.3024	30.4948	30.3127	29.8037	29.5549	5.04	28.3024	30.4948	30.228	30.1237	29.7056	29.6598	5.04	28.3024	30.4948	30.228	29.9541	29.2399	29.9736	29.7907	5.04	28.8051
5.08	29.9083	29.9475	29.8626	29.7907	29.7841	5.08	29.391	31.5876	31.8961	30.5987	30.2475	29.9671	5.08	29.391	31.5876	31.8961	30.8711	30.0846	29.8168		5.08	26.8471	30.9423	29.4631	29.0425	29.4303	5.08	28.236	30.5143	30.2996	29.856	29.5943	5.08	28.236	30.5143	30.2736	30.1628	29.7645	29.6336	5.08	28.236	30.5143	30.2736	29.9541	29.253	29.9867	29.8299	5.08	28.8381
5.12	29.9018	29.9606	29.9867	29.758	29.8168	5.12	29.4435	31.5812	31.8897	30.5792	30.2736	29.9998	5.12	29.4435	31.5812	31.8897	30.897	30.1172	29.7776		5.12	26.8336	30.9164	29.4631	29.0425	29.45	5.12	28.2559	30.4948	30.4233	29.8691	29.5812	5.12	28.2559	30.4948	30.228	30.1759	29.8299	29.627	5.12	28.2559	30.4948	30.228	30.0259	29.2727	29.9214	29.8495	5.12	28.7523
5.16	29.941	29.9541	29.8037	29.8103	29.8037	5.16	29.3647	31.5812	31.9731	30.5987	30.3192	29.9998	5.16	29.3647	31.5812	31.9731	30.9034	30.0976	29.7776		5.16	26.8269	30.884	29.4631	29.1017	29.5025	5.16	28.2692	30.4948	30.3192	29.8299	29.5025	5.16	28.2692	30.4948	30.2085	30.1433	29.7972	29.6467	5.16	28.2692	30.4948	30.2085	30.1498	29.2136	30.0585	29.8626	5.16	28.8249
5.2	29.9867	30.0259	29.8822	29.8364	29.8953	5.2	29.5484	31.6198	31.9859	30.6052	30.3387	30.1302	5.2	29.5484	31.6198	31.9859	30.9746	30.0585	29.843		5.2	26.8269	30.8451	29.5943	29.0886	29.5353	5.2	28.4018	30.4428	30.4558	29.8887	29.5353	5.2	28.4018	30.4428	30.215	30.1889	29.7645	29.771	5.2	28.4018	30.4428	30.215	30.1042	29.2201	29.9541	29.8495	5.2	28.8117
5.24	30.0454	30.0259	29.9083	29.8168	29.8953	5.24	29.5222	31.6455	31.9666	30.722	30.3322	30.0585	5.24	29.5222	31.6455	31.9666	30.9746	30.1042	29.9214		5.24	26.8605	30.9034	29.6401	29.1412	29.5549	5.24	28.3952	30.5468	30.5143	29.9475	29.5877	5.24	28.3952	30.5468	30.2671	30.2345	29.7645	29.7907	5.24	28.3952	30.5468	30.2671	30.0454	29.2727	30.0128	29.843	5.24	28.7721
5.28	30.0324	30.0454	29.9214	29.8168	29.9671	5.28	29.5943	31.7869	32.0115	30.7998	30.2996	30.0715	5.28	29.5943	31.7869	32.0115	30.994	30.1172	29.9736		5.28	26.8336	30.9811	29.6401	29.1346	29.5943	5.28	28.3488	30.4948	30.5338	29.9279	29.6074	5.28	28.3488	30.4948	30.4038	30.241	29.8364	29.8234	5.28	28.3488	30.4948	30.4038	30.1042	29.299	30.052	29.856	5.28	28.9173
5.32	30.0454	30.052	29.9736	29.8691	29.9736	5.32	29.5812	31.7612	32.0308	30.7868	30.3712	30.1107	5.32	29.5812	31.7612	32.0308	31.0135	30.1042	29.9083		5.32	26.8941	31.0135	29.5549	29.1675	29.5484	5.32	28.4084	30.5532	30.5597	29.9736	29.5877	5.32	28.4084	30.5532	30.3647	30.2801	29.8822	29.8103	5.32	28.4084	30.5532	30.3647	30.1368	29.3121	30.0911	29.8626	5.32	28.8909
5.36	30.1172	30.1172	29.9671	29.9018	29.9475	5.36	29.5549	31.7355	32.0051	30.7674	30.3127	30.1628	5.36	29.5549	31.7355	32.0051	31.0135	30.1889	29.8757		5.36	26.9613	30.9552	29.6598	29.2201	29.5484	5.36	28.3885	30.5857	30.5662	29.9606	29.6336	5.36	28.3885	30.5857	30.3842	30.3127	29.9345	29.771	5.36	28.3885	30.5857	30.3842	30.1302	29.345	30.0846	29.9083	5.36	28.8909
5.4	30.1107	30.1563	29.9802	29.9802	30.0715	5.4	29.7252	31.7869	32.0308	30.8451	30.3582	30.1759	5.4	29.7252	31.7869	32.0308	31.0005	30.2215	30.0585		5.4	26.8874	30.9746	29.6663	29.1938	29.5615	5.4	28.3819	30.5662	30.5403	29.941	29.6336	5.4	28.3819	30.5662	30.3842	30.2345	29.9149	29.7776	5.4	28.3819	30.5662	30.3842	30.1694	29.3975	30.1628	29.9606	5.4	28.9239
5.44	30.1498	30.1368	29.9802	29.9867	29.9932	5.44	29.7121	31.7677	32.1333	30.8063	30.4363	30.1302	5.44	29.7121	31.7677	32.1333	31.0523	30.2475	30.052		5.44	26.9478	31.0458	29.6401	29.1938	29.5943	5.44	28.3952	30.6701	30.4883	30.0193	29.6729	5.44	28.3952	30.6701	30.3842	30.4428	29.9475	29.8037	5.44	28.3952	30.6701	30.3842	30.2475	29.4894	30.0911	29.9998	5.44	29.0359
5.48	30.1628	30.1172	30.0128	30.0259	29.9802	5.48	29.6663	31.7741	32.1204	30.7739	30.5273	30.2085	5.48	29.6663	31.7741	32.1204	31.0975	30.2541	30.0454		5.48	26.9545	31.0587	29.7318	29.082	29.5681	5.48	28.3687	30.735	30.4948	30.0324	29.7252	5.48	28.3687	30.735	30.4623	30.4558	29.9736	29.8822	5.48	28.3687	30.735	30.4623	30.228	29.4172	30.1563	30.0389	5.48	29.0754
5.52	30.215	30.1368	30.0781	30.0389	30.0193	5.52	29.6663	31.819	32.1076	30.7285	30.5597	30.1824	5.52	29.6663	31.819	32.1076	31.175	30.2996	29.9802		5.52	26.9478	31.091	29.6925	29.207	29.5681	5.52	28.3687	30.7868	30.5662	30.1107	29.771	5.52	28.3687	30.7868	30.4753	30.5338	29.9802	29.8822	5.52	28.3687	30.7868	30.4753	30.2475	29.4303	30.215	30.0389	5.52	29.1544
5.56	30.2541	30.3062	30.0911	30.0324	30.0324	5.56	29.7121	31.7998	32.1012	30.7674	30.5727	30.2606	5.56	29.7121	31.7998	32.1012	31.175	30.3907	30.0259		5.56	26.9142	31.0717	29.7383	29.1609	29.6139	5.56	28.3687	30.7998	30.5273	30.1433	29.8364	5.56	28.3687	30.7998	30.5532	30.5208	29.9606	29.9345	5.56	28.3687	30.7998	30.5532	30.2996	29.4435	30.2215	30.0259	5.56	29.1412
5.6	30.2671	30.3322	30.1498	30.0128	30.0781	5.6	29.758	31.7805	32.1333	30.7868	30.5987	30.2866	5.6	29.758	31.7805	32.1333	31.1621	30.2606	30.0259		5.6	26.8067	31.0975	29.7514	29.1873	29.6467	5.6	28.3289	30.8775	30.5403	30.0128	29.7645	5.6	28.3289	30.8775	30.5727	30.4623	30.0128	29.9736	5.6	28.3289	30.8775	30.5727	30.3322	29.4566	30.2606	30.0715	5.6	29.1083
5.64	30.2475	30.3192	30.1563	29.9932	30.0781	5.64	29.7907	31.8447	32.1653	30.8192	30.5792	30.3647	5.64	29.7907	31.8447	32.1653	31.188	30.3452	30.0976		5.64	26.9008	31.1427	29.7907	29.2662	29.6205	5.64	28.4217	30.8257	30.5532	30.0454	29.758	5.64	28.4217	30.8257	30.5662	30.4168	30.0063	29.9932	5.64	28.4217	30.8257	30.5662	30.2996	29.5287	30.1433	30.0389	5.64	29.0622
5.68	30.2215	30.3387	30.1889	30.065	30.1694	5.68	29.7318	31.8897	32.1653	30.7479	30.5792	30.3517	5.68	29.7318	31.8897	32.1653	31.2332	30.3387	30.0324		5.68	26.9545	31.188	29.7841	29.253	29.7121	5.68	28.4283	30.8128	30.6636	30.1628	29.9149	5.68	28.4283	30.8128	30.6247	30.5078	30.0324	30.0193	5.68	28.4283	30.8128	30.6247	30.2801	29.5484	30.2019	30.052	5.68	29.1412
5.76	30.3062	30.3257	30.1759	30.241	30.1302	5.76	29.8234	31.9282	32.2229	30.7739	30.5987	30.2606	5.76	29.8234	31.9282	32.2229	31.2525	30.3582	30.1172		5.76	27.0217	31.1686	29.8234	29.2662	29.6991	5.76	28.4812	30.7285	30.6571	30.2085	29.8691	5.76	28.4812	30.7285	30.6117	30.5273	29.9606	29.9932	5.76	28.4812	30.7285	30.6117	30.2606	29.5615	30.2996	30.1237	5.76	29.1807
5.8	30.3257	30.2996	30.2475	30.3062	30.0454	5.8	29.6794	32.0051	32.3444	30.8322	30.6247	30.241	5.8	29.6794	32.0051	32.3444	31.3622	30.3582	30.1042		5.8	27.0418	31.1944	29.8691	29.2662	29.758	5.8	28.521	30.735	30.6961	30.1433	29.9083	5.8	28.521	30.735	30.6117	30.5468	29.9475	30.0846	5.8	28.521	30.735	30.6117	30.2866	29.5746	30.2801	30.0976	5.8	29.1807
5.84	30.3973	30.2866	30.3387	30.1628	30.0128	5.84	29.7318	32.0051	32.3763	30.9811	30.6571	30.2345	5.84	29.7318	32.0051	32.3763	31.3428	30.4038	30.1172		5.84	26.9881	31.1815	29.8495	29.253	29.8168	5.84	28.4879	30.8128	30.8387	30.1433	29.8626	5.84	28.4879	30.8128	30.6377	30.5273	29.9606	29.9736	5.84	28.4879	30.8128	30.6377	30.2475	29.5877	30.2866	30.1694	5.84	29.1807
5.88	30.4493	30.3842	30.3452	30.1824	30.0389	5.88	29.8495	32.0308	32.3763	31.0458	30.6441	30.3387	5.88	29.8495	32.0308	32.3763	31.2912	30.4038	30.1563		5.88	26.9277	31.2461	29.8168	29.3384	29.8168	5.88	28.5607	30.9099	30.7933	30.2019	29.9932	5.88	28.5607	30.9099	30.6571	30.4948	30.1172	29.9541	5.88	28.5607	30.9099	30.6571	30.3647	29.5943	30.3387	30.2019	5.88	29.1609
5.92	30.4428	30.3973	30.3777	30.1563	30.0781	5.92	29.9149	31.9666	32.3571	31.0458	30.6506	30.3647	5.92	29.9149	31.9666	32.3571	31.3622	30.4038	30.1694		5.92	26.921	31.2654	29.8299	29.3516	29.7645	5.92	28.5143	30.8646	30.7933	30.1954	29.9867	5.92	28.5143	30.8646	30.709	30.4948	30.1628	29.9671	5.92	28.5143	30.8646	30.709	30.3712	29.5746	30.3387	30.2215	5.92	29.1281
5.96	30.2996	30.3973	30.4038	30.2541	30.0846	5.96	29.8887	31.9025	32.3571	31.0846	30.6961	30.2866	5.96	29.8887	31.9025	32.3571	31.3299	30.5013	30.1694		5.96	26.9948	31.2719	29.9736	29.3319	29.8299	5.96	28.5871	30.8387	30.7933	30.1824	29.941	5.96	28.5871	30.8387	30.6766	30.5143	30.1498	29.9736	5.96	28.5871	30.8387	30.6766	30.3517	29.5746	30.3712	30.2541	5.96	29.1609
6	30.3062	30.3973	30.4298	30.2541	30.1824	6	29.9541	31.9153	32.3635	31.0587	30.7479	30.3322	6	29.9541	31.9153	32.3635	31.3235	30.5468	30.1433		6	26.8941	31.3235	29.9541	29.4172	29.8037	6	28.5474	30.7868	30.8387	30.2085	29.9541	6	28.5474	30.7868	30.6896	30.5208	30.1824	30.0128	6	28.5474	30.7868	30.6896	30.3842	29.6401	30.3647	30.2475	6	29.207
6.04	30.3257	30.5338	30.4038	30.2736	30.1433	6.04	29.9671	32.0179	32.4721	31.0135	30.7803	30.4038	6.04	29.9671	32.0179	32.4721	31.3106	30.5468	30.1889		6.04	27.0082	31.2848	30.0324	29.45	29.8364	6.04	28.5805	30.9552	30.9034	30.3062	29.8822	6.04	28.5805	30.9552	30.722	30.7025	30.1302	30.1628	6.04	28.5805	30.9552	30.722	30.4363	29.7645	30.4038	30.2215	6.04	29.2399
6.08	30.3582	30.4363	30.4298	30.228	30.2215	6.08	30.0324	32.0436	32.4274	31.0264	30.8192	30.4493	6.08	30.0324	32.0436	32.4274	31.3299	30.5727	30.1759		6.08	26.9814	31.3364	29.941	29.5025	29.8495	6.08	28.6003	30.897	30.9682	30.2931	29.9541	6.08	28.6003	30.897	30.7868	30.6701	30.1889	30.1107	6.08	28.6003	30.897	30.7868	30.4623	29.8037	30.4103	30.1889	6.08	29.2793
6.12	30.3777	30.4688	30.4168	30.2931	30.2475	6.12	29.9998	32.0628	32.4466	31.091	30.8128	30.5468	6.12	29.9998	32.0628	32.4466	31.3364	30.5532	30.1302		6.12	27.0485	31.3686	29.9541	29.5418	29.8691	6.12	28.5342	30.9358	30.9164	30.2736	30.0585	6.12	28.5342	30.9358	30.8257	30.6506	30.228	30.1628	6.12	28.5342	30.9358	30.8257	30.5078	29.7972	30.4103	30.1889	6.12	29.1938
6.16	30.4233	30.4753	30.3777	30.2866	30.2019	6.16	29.9867	32.0628	32.3699	31.1492	31.0393	30.5143	6.16	29.9867	32.0628	32.3699	31.4653	30.5597	30.1824		6.16	27.1223	31.3428	29.9736	29.5025	29.8626	6.16	28.5805	31.0587	30.9682	30.3387	30.0193	6.16	28.5805	31.0587	30.8387	30.6766	30.2606	30.1954	6.16	28.5805	31.0587	30.8387	30.5857	29.7841	30.3257	30.215	6.16	29.2924
6.2	30.3322	30.4883	30.3907	30.3127	30.215	6.2	30.0193	32.0948	32.4019	31.0393	31.0264	30.5662	6.2	30.0193	32.0948	32.4019	31.4395	30.5792	30.2475		6.2	26.9948	31.4009	29.9214	29.5222	29.9279	6.2	28.8777	31.0264	30.9617	30.3712	30.0389	6.2	28.8777	31.0264	30.8711	30.722	30.3192	30.2215	6.2	28.8777	31.0264	30.8711	30.6117	29.758	30.4298	30.2801	6.2	29.299
6.24	30.5013	30.4883	30.3907	30.4233	30.2671	6.24	30.052	32.082	32.4721	31.0587	30.9617	30.5143	6.24	30.052	32.082	32.4721	31.5555	30.5857	30.2541		6.24	27.0217	31.4395	30.0324	29.5877	29.9345	6.24	28.8513	31.0199	30.9746	30.3647	30.0911	6.24	28.8513	31.0199	30.9293	30.7479	30.3842	30.2801	6.24	28.8513	31.0199	30.9293	30.5922	29.7907	30.4753	30.2736	6.24	29.3056
6.28	30.5208	30.4818	30.3777	30.4038	30.1954	6.28	30.0454	32.082	32.5168	31.0393	30.9811	30.5922	6.28	30.0454	32.082	32.5168	31.5168	30.5922	30.3127		6.28	26.9814	31.4524	30.1628	29.5812	29.941	6.28	28.7853	31.0329	30.9552	30.4233	30.0846	6.28	28.7853	31.0329	30.8905	30.7025	30.3842	30.3062	6.28	28.7853	31.0329	30.8905	30.6377	29.8168	30.5013	30.3452	6.28	29.3056
6.32	30.4688	30.5403	30.4818	30.4493	30.2475	6.32	30.0063	32.0436	32.5104	31.0652	31.007	30.5922	6.32	30.0063	32.0436	32.5104	31.4524	30.6052	30.3322		6.32	26.9948	31.4395	30.1237	29.5746	29.9279	6.32	28.8051	30.9746	30.9552	30.3842	30.1237	6.32	28.8051	30.9746	31.0135	30.7933	30.3647	30.2801	6.32	28.8051	30.9746	31.0135	30.5597	29.843	30.5662	30.3517	6.32	29.1873
6.36	30.5013	30.5857	30.4753	30.3973	30.4038	6.36	30.0063	32.0756	32.5806	31.1492	30.9682	30.6182	6.36	30.0063	32.0756	32.5806	31.4395	30.7415	30.3973		6.36	26.9613	31.4073	30.1172	29.686	29.9149	6.36	28.7655	31.0264	31.0005	30.4753	30.0976	6.36	28.7655	31.0264	30.994	30.884	30.3322	30.3777	6.36	28.7655	31.0264	30.994	30.6506	29.9083	30.5922	30.3647	6.36	29.2464
6.4	30.4818	30.5987	30.6312	30.5143	30.3973	6.4	30.065	32.1012	32.587	31.2461	31.007	30.5662	6.4	30.065	32.1012	32.587	31.3815	30.8128	30.3907		6.4	27.0686	31.4202	30.1237	29.6991	29.941	6.4	28.7325	30.9552	31.0587	30.4753	30.0389	6.4	28.7325	30.9552	31.0005	30.8646	30.3192	30.2996	6.4	28.7325	30.9552	31.0005	30.6377	29.9149	30.5727	30.4038	6.4	29.3516
6.44	30.5208	30.6831	30.5857	30.4363	30.4363	6.44	30.0781	32.0628	32.5742	31.2267	31.0135	30.5792	6.44	30.0781	32.0628	32.5742	31.504	30.8451	30.3842		6.44	27.1022	31.4395	30.1107	29.6008	29.9867	6.44	28.7391	30.994	31.0846	30.4363	30.0324	6.44	28.7391	30.994	31.0652	30.7933	30.3647	30.3192	6.44	28.7391	30.994	31.0652	30.6701	29.9149	30.5013	30.3257	6.44	29.4041
6.48	30.6312	30.5597	30.6247	30.4428	30.4233	6.48	30.0454	32.082	32.5487	31.2912	31.007	30.722	6.48	30.0454	32.082	32.5487	31.5555	30.8646	30.3647		6.48	27.1022	31.4911	30.0976	29.6467	30.0128	6.48	28.7193	30.9811	31.091	30.5143	30.052	6.48	28.7193	30.9811	31.0458	30.8322	30.3907	30.3452	6.48	28.7193	30.9811	31.0458	30.6701	29.9018	30.5532	30.3517	6.48	29.345
6.52	30.6117	30.6117	30.6052	30.4688	30.4038	6.52	30.1107	32.2293	32.5806	31.3686	31.0717	30.7544	6.52	30.1107	32.2293	32.5806	31.6198	30.7544	30.4038		6.52	27.1022	31.5426	30.1563	29.6467	30.0389	6.52	28.6532	30.9423	31.0781	30.5143	30.0846	6.52	28.6532	30.9423	31.0717	30.8516	30.4103	30.3062	6.52	28.6532	30.9423	31.0717	30.7155	29.8168	30.5532	30.3712	6.52	29.3516
6.6	30.5208	30.6571	30.6247	30.5143	30.4428	6.6	30.1302	32.2357	32.5487	31.317	31.0652	30.6961	6.6	30.1302	32.2357	32.5487	31.6262	30.8257	30.4753		6.6	27.0351	31.4975	30.1889	29.6532	30.0193	6.6	28.7523	31.0199	31.0846	30.4883	30.1694	6.6	28.7523	31.0199	31.1104	30.8387	30.4233	30.3322	6.6	28.7523	31.0199	31.1104	30.7544	29.9279	30.7155	30.4493	6.6	29.3516
6.64	30.6441	30.735	30.7285	30.5403	30.5532	6.64	30.1694	32.2293	32.6826	31.259	31.0975	30.7025	6.64	30.1694	32.2293	32.6826	31.6391	30.8192	30.5403		6.64	27.0552	31.5361	30.2215	29.7645	30.0389	6.64	28.7523	31.0135	31.175	30.5078	30.1498	6.64	28.7523	31.0135	31.1944	30.8257	30.4883	30.3452	6.64	28.7523	31.0135	31.1944	30.7544	29.9606	30.7609	30.4363	6.64	29.3253
6.68	30.6831	30.6701	30.7544	30.5468	30.5013	6.68	30.1954	32.2229	32.638	31.2783	31.1234	30.7803	6.68	30.1954	32.2229	32.638	31.6713	30.8257	30.4753		6.68	27.1625	31.6005	30.2019	29.7121	30.052	6.68	28.7853	31.0781	31.1492	30.5338	30.1889	6.68	28.7853	31.0781	31.1169	30.8775	30.5662	30.3907	6.68	28.7853	31.0781	31.1169	30.6636	29.9083	30.6831	30.4298	6.68	29.3253
6.72	30.7155	30.7415	30.7415	30.5922	30.4948	6.72	30.241	32.2037	32.6252	31.2783	31.1104	30.7479	6.72	30.241	32.2037	32.6252	31.7034	30.8128	30.5403		6.72	27.1826	31.5941	30.241	29.7318	30.1172	6.72	28.8381	31.0781	31.2073	30.5273	30.2019	6.72	28.8381	31.0781	31.1557	30.9358	30.5338	30.3842	6.72	28.8381	31.0781	31.1557	30.709	29.9149	30.6961	30.4493	6.72	29.3844
6.76	30.7025	30.7415	30.7803	30.5857	30.4883	6.76	30.2801	32.1973	32.6125	31.3235	31.1104	30.7609	6.76	30.2801	32.1973	32.6125	31.6584	30.8192	30.5143		6.76	27.2295	31.6134	30.2736	29.7056	30.1172	6.76	28.8447	31.1427	31.2396	30.6052	30.2085	6.76	28.8447	31.1427	31.2009	30.9034	30.5662	30.4298	6.76	28.8447	31.1427	31.2009	30.722	29.9018	30.735	30.4948	6.76	29.4106
6.8	30.6247	30.7544	30.7803	30.5792	30.4558	6.8	30.2085	32.1973	32.6698	31.3041	31.1621	30.735	6.8	30.2085	32.1973	32.6698	31.6905	30.8257	30.5532		6.8	27.1826	31.5748	30.2996	29.6925	30.1368	6.8	28.8183	31.2396	31.2138	30.5792	30.241	6.8	28.8183	31.2396	31.1686	30.897	30.5532	30.3777	6.8	28.8183	31.2396	31.1686	30.7285	29.9214	30.722	30.5468	6.8	29.3975
6.84	30.6182	30.7544	30.8257	30.5468	30.4363	6.84	30.1628	32.3124	32.6571	31.3686	31.175	30.7544	6.84	30.1628	32.3124	32.6571	31.7098	30.884	30.4948		6.84	27.0686	31.5941	30.2866	29.7187	30.1302	6.84	28.8117	31.2396	31.2073	30.5468	30.2866	6.84	28.8117	31.2396	31.188	30.8905	30.5922	30.5338	6.84	28.8117	31.2396	31.188	30.6701	29.9345	30.7025	30.6117	6.84	29.4959
6.88	30.735	30.7544	30.6636	30.5727	30.5078	6.88	30.241	32.2421	32.6125	31.3944	31.1427	30.8128	6.88	30.241	32.2421	32.6125	31.6198	30.8516	30.6247		6.88	27.0485	31.6134	30.3517	29.7776	30.1237	6.88	28.7721	31.2073	31.2977	30.5338	30.3322	6.88	28.7721	31.2073	31.2267	30.9552	30.5403	30.4493	6.88	28.7721	31.2073	31.2267	30.7739	30.0781	30.7415	30.6052	6.88	29.5222
6.92	30.7868	30.7415	30.7609	30.5727	30.5792	6.92	30.2736	32.3252	32.5933	31.3364	31.2267	30.8516	6.92	30.2736	32.3252	32.5933	31.6262	30.9164	30.6117		6.92	27.0619	31.6584	30.2541	29.8037	30.2475	6.92	28.8447	31.2267	31.3751	30.5792	30.3257	6.92	28.8447	31.2267	31.2654	30.9552	30.6052	30.4623	6.92	28.8447	31.2267	31.2654	30.7868	30.1498	30.709	30.5857	6.92	29.5287
6.96	30.8646	30.8128	30.7739	30.6247	30.6766	6.96	30.3257	32.2932	32.5806	31.3557	31.2396	30.9423	6.96	30.3257	32.2932	32.5806	31.6777	30.8775	30.735		6.96	27.1625	31.6455	30.3062	29.7972	30.2671	6.96	28.8513	31.2848	31.3686	30.5922	30.3842	6.96	28.8513	31.2848	31.2525	30.9617	30.5987	30.4558	6.96	28.8513	31.2848	31.2525	30.709	30.228	30.7544	30.5468	6.96	29.5484
7	30.9034	30.8257	30.8128	30.6182	30.6701	7	30.3127	32.3891	32.6953	31.3944	31.2461	30.9099	7	30.3127	32.3891	32.6953	31.7484	30.9811	30.6571		7	27.1893	31.6777	30.2931	29.8234	30.215	7	28.8183	31.388	31.4009	30.6377	30.3973	7	28.8183	31.388	31.2848	31.0199	30.6506	30.4818	7	28.8183	31.388	31.2848	30.6896	30.1172	30.8646	30.5727	7	29.5681
7.04	30.9423	30.8322	30.7415	30.7998	30.6701	7.04	30.3647	32.2485	32.6698	31.446	31.2719	30.897	7.04	30.3647	32.2485	32.6698	31.7484	30.994	30.6182		7.04	27.1424	31.697	30.2996	29.9541	30.2671	7.04	28.8381	31.3815	31.3493	30.6636	30.4493	7.04	28.8381	31.3815	31.2848	31.1234	30.6766	30.5078	7.04	28.8381	31.3815	31.2848	30.7609	30.1237	30.7155	30.6441	7.04	29.5877
7.08	30.9552	30.8516	30.7609	30.7025	30.6247	7.08	30.3712	32.2932	32.6826	31.6648	31.2396	30.9617	7.08	30.3712	32.2932	32.6826	31.6905	30.9811	30.6441		7.08	27.1223	31.7098	30.4038	29.9736	30.241	7.08	28.9371	31.3944	31.3751	30.6377	30.5403	7.08	28.9371	31.3944	31.3235	31.1234	30.6182	30.4688	7.08	28.9371	31.3944	31.3235	30.7674	30.1628	30.8063	30.6377	7.08	29.6794
7.12	30.9552	30.8646	30.7998	30.6766	30.6182	7.12	30.4428	32.2868	32.7654	31.5297	31.3686	30.9488	7.12	30.4428	32.2868	32.7654	31.7098	31.0329	30.6377		7.12	27.1692	31.7484	30.4298	29.9736	30.2606	7.12	28.9568	31.3106	31.3751	30.6052	30.4883	7.12	28.9568	31.3106	31.3041	31.0329	30.5987	30.5597	7.12	28.9568	31.3106	31.3041	30.9034	30.1498	30.7739	30.6636	7.12	29.6991
7.16	30.9099	30.9423	30.8451	30.735	30.6312	7.16	30.4493	32.3955	32.7654	31.4782	31.3815	30.9358	7.16	30.4493	32.3955	32.7654	31.7741	31.091	30.6701		7.16	27.1759	31.7355	30.4428	29.9475	30.215	7.16	28.9502	31.3235	31.3557	30.7479	30.4428	7.16	28.9502	31.3235	31.2654	31.0329	30.6052	30.7415	7.16	28.9502	31.3235	31.2654	30.8646	30.1954	30.7544	30.6247	7.16	29.686
7.2	30.8711	30.9552	30.9164	30.6896	30.6571	7.2	30.4103	32.453	32.7144	31.5233	31.3235	31.0005	7.2	30.4103	32.453	32.7144	31.7484	31.091	30.6636		7.2	27.1357	31.7612	30.4558	29.9736	30.228	7.2	28.9964	31.3493	31.4073	30.7868	30.4688	7.2	28.9964	31.3493	31.2848	31.0587	30.722	30.7025	7.2	28.9964	31.3493	31.2848	30.9034	30.2019	30.7933	30.6701	7.2	29.6401
7.24	30.884	30.9293	30.884	30.7803	30.7155	7.24	30.4233	32.3699	32.8799	31.5297	31.2912	30.994	7.24	30.4233	32.3699	32.8799	31.7291	31.0717	30.7025		7.24	27.129	31.7934	30.4623	29.9671	30.2541	7.24	28.9107	31.2912	31.4138	30.7739	30.4818	7.24	28.9107	31.2912	31.3493	31.0652	30.7739	30.7544	7.24	28.9107	31.2912	31.3493	30.9746	30.1889	30.9293	30.6961	7.24	29.627
7.28	30.9293	31.007	30.9034	30.7998	30.6896	7.28	30.4753	32.4338	32.8799	31.5426	31.2912	31.0587	7.28	30.4753	32.4338	32.8799	31.7998	31.0329	30.7933		7.28	27.1558	31.7677	30.5078	29.9475	30.2606	7.28	28.9305	31.3686	31.3944	30.7674	30.5403	7.28	28.9305	31.3686	31.3622	31.0781	30.7739	30.7415	7.28	28.9305	31.3686	31.3622	30.9229	30.1368	30.9358	30.7025	7.28	29.6205
7.32	30.9423	31.0005	31.0199	30.8646	30.7415	7.32	30.5468	32.3763	32.8481	31.5748	31.3944	31.0975	7.32	30.5468	32.3763	32.8481	31.7869	31.0846	30.8192		7.32	27.1759	31.7548	30.5078	29.9867	30.2475	7.32	28.97	31.4266	31.504	30.8063	30.5662	7.32	28.97	31.4266	31.3364	31.1621	30.7868	30.8063	7.32	28.97	31.4266	31.3364	30.9358	30.1889	30.9423	30.6961	7.32	29.6729
7.36	31.0005	31.0587	31.0264	30.8711	30.7415	7.36	30.3842	32.3699	32.8609	31.5876	31.4073	31.0846	7.36	30.3842	32.3699	32.8609	31.8062	31.0717	30.7415		7.36	27.2027	31.7998	30.5403	30.0324	30.2606	7.36	28.9832	31.4202	31.5555	30.8516	30.4948	7.36	28.9832	31.4202	31.446	31.1686	30.8063	30.7609	7.36	28.9832	31.4202	31.446	30.9811	30.1237	30.9358	30.722	7.36	29.6729
7.44	31.0393	31.0587	31.0652	30.8322	30.7803	7.44	30.4688	32.4594	32.8163	31.5619	31.3944	31.091	7.44	30.4688	32.4594	32.8163	31.8062	31.0781	30.7998		7.44	27.2027	31.7998	30.5273	30.052	30.3192	7.44	28.9634	31.4266	31.5361	30.8128	30.4428	7.44	28.9634	31.4266	31.4009	31.2073	30.7933	30.6312	7.44	28.9634	31.4266	31.4009	30.9876	30.2085	30.9811	30.7609	7.44	29.6925
7.48	31.0135	31.0005	31.0652	30.8711	30.8451	7.48	30.4948	32.5104	32.8481	31.5812	31.4138	31.1686	7.48	30.4948	32.5104	32.8481	31.819	31.0781	30.9488		7.48	27.2697	31.8062	30.4948	30.0781	30.3127	7.48	29.0227	31.5104	31.5555	30.897	30.5597	7.48	29.0227	31.5104	31.4009	31.2073	30.8581	30.6896	7.48	29.0227	31.5104	31.4009	30.9746	30.241	31.007	30.7544	7.48	29.6794
7.52	31.0393	31.0329	31.0717	30.8516	30.9229	7.52	30.4623	32.5359	32.8863	31.652	31.4911	31.1427	7.52	30.4623	32.5359	32.8863	31.8062	31.317	30.9164		7.52	27.2027	31.7484	30.5987	30.0976	30.4233	7.52	29.0556	31.5233	31.652	30.8063	30.5727	7.52	29.0556	31.5233	31.4589	31.2267	30.8192	30.735	7.52	29.0556	31.5233	31.4589	31.0264	30.2606	30.9746	30.7544	7.52	29.627
7.56	31.0652	31.0458	31.0975	30.9811	30.9358	7.56	30.5987	32.5615	32.9245	31.6777	31.3944	31.1621	7.56	30.5987	32.5615	32.9245	31.8126	31.2783	30.9358		7.56	27.283	32.0051	30.5727	30.0846	30.3973	7.56	29.0688	31.4653	31.7098	30.7544	30.6701	7.56	29.0688	31.4653	31.4524	31.2202	30.8775	30.8063	7.56	29.0688	31.4653	31.4524	31.0587	30.241	30.9811	30.7415	7.56	29.6336
7.6	31.1104	31.0846	31.1944	30.8646	30.9746	7.6	30.6117	32.5423	32.9499	31.6777	31.3815	31.175	7.6	30.6117	32.5423	32.9499	31.8255	31.2009	30.884		7.6	27.2228	31.8832	30.5792	30.1302	30.4363	7.6	29.0227	31.4589	31.7034	30.7803	30.7415	7.6	29.0227	31.4589	31.4846	31.1686	30.884	30.7285	7.6	29.0227	31.4589	31.4846	31.0199	30.2345	31.0393	30.7415	7.6	29.6401
7.64	31.1234	31.1557	31.2138	30.8711	30.9617	7.64	30.5792	32.5742	32.9054	31.8832	31.4073	31.188	7.64	30.5792	32.5742	32.9054	31.9346	31.175	30.9552		7.64	27.2362	31.8447	30.5597	30.1042	30.4753	7.64	29.0359	31.3493	31.7034	30.7739	30.6831	7.64	29.0359	31.3493	31.4717	31.1686	30.9164	30.7285	7.64	29.0359	31.3493	31.4717	31.0264	30.3192	30.9617	30.7479	7.64	29.6925
7.68	31.2396	31.1427	31.1944	30.9164	30.9423	7.68	30.5662	32.5487	32.9117	31.8512	31.4717	31.175	7.68	30.5662	32.5487	32.9117	31.9474	31.188	30.9552		7.68	27.3165	31.9602	30.6052	30.1237	30.5403	7.68	29.0556	31.3686	31.6777	30.7868	30.6766	7.68	29.0556	31.3686	31.4911	31.1944	30.9293	30.8128	7.68	29.0556	31.3686	31.4911	31.0975	30.2931	31.1427	30.7803	7.68	29.7383
7.72	31.2073	31.2009	31.1557	30.9682	30.9746	7.72	30.6636	32.7463	32.9563	31.864	31.5104	31.1686	7.72	30.6636	32.7463	32.9563	31.9025	31.188	30.9617		7.72	27.35	31.9089	30.6636	30.2475	30.4428	7.72	29.1149	31.5233	31.6391	30.8516	30.6961	7.72	29.1149	31.5233	31.5876	31.2719	30.9552	30.8387	7.72	29.1149	31.5233	31.5876	31.104	30.3712	31.3106	30.7479	7.72	29.8364
7.76	31.1427	31.1944	31.0846	30.9876	30.9358	7.76	30.6831	32.7399	32.9181	31.7548	31.5748	31.175	7.76	30.6831	32.7399	32.9181	31.9089	31.259	30.9617		7.76	27.3567	31.9282	30.722	30.1889	30.4298	7.76	29.1807	31.5426	31.6905	30.9034	30.709	7.76	29.1807	31.5426	31.6005	31.2396	30.994	30.8128	7.76	29.1807	31.5426	31.6005	31.1621	30.4038	31.2654	30.7868	7.76	29.843
7.8	31.2009	31.1492	31.1557	30.9229	31.0199	7.8	30.6377	32.7208	32.9499	31.7677	31.5812	31.2138	7.8	30.6377	32.7208	32.9499	32.0243	31.2461	31.0135		7.8	27.35	31.9025	30.7025	30.1694	30.3777	7.8	29.2201	31.5555	31.7227	30.9682	30.6117	7.8	29.2201	31.5555	31.5748	31.2525	31.0264	30.7933	7.8	29.2201	31.5555	31.5748	31.1492	30.4168	31.175	30.8646	7.8	29.771
7.84	31.2719	31.1815	31.1557	30.9552	30.9552	7.84	30.6312	32.5742	32.9372	31.9025	31.6391	31.2332	7.84	30.6312	32.5742	32.9372	32.0372	31.2783	30.9876		7.84	27.2429	31.8897	30.7674	30.2019	30.4233	7.84	29.1807	31.5748	31.742	31.0199	30.6636	7.84	29.1807	31.5748	31.6005	31.2202	31.0393	30.7933	7.84	29.1807	31.5748	31.6005	31.188	30.3842	31.2461	30.8257	7.84	29.8037
7.88	31.2912	31.1557	31.1815	31.0587	30.9682	7.88	30.6182	32.5742	32.9563	31.7291	31.6262	31.2332	7.88	30.6182	32.5742	32.9563	32.0692	31.2654	30.9746		7.88	27.2764	31.9089	30.7868	30.1954	30.4818	7.88	29.1938	31.5426	31.7163	31.0458	30.6441	7.88	29.1938	31.5426	31.5748	31.259	30.9876	30.8128	7.88	29.1938	31.5426	31.5748	31.2138	30.4298	31.188	30.8775	7.88	29.7776
7.92	31.3041	31.2525	31.1492	31.0199	30.994	7.92	30.6961	32.5806	32.9308	31.7034	31.6391	31.2009	7.92	30.6961	32.5806	32.9308	32.0243	31.2977	30.9746		7.92	27.3031	31.9089	30.7998	30.1954	30.4688	7.92	29.1544	31.5233	31.7034	31.0846	30.722	7.92	29.1544	31.5233	31.6198	31.2912	31.0458	30.8775	7.92	29.1544	31.5233	31.6198	31.2332	30.4428	31.2848	30.9811	7.92	29.8299
7.96	31.3041	31.2654	31.175	31.0264	30.9811	7.96	30.6636	32.6252	32.9245	31.7355	31.6262	31.2719	7.96	30.6636	32.6252	32.9245	31.9731	31.259	30.9876		7.96	27.2964	31.9025	30.735	30.2801	30.4818	7.96	29.1346	31.6005	31.6198	31.091	30.8128	7.96	29.1346	31.6005	31.6648	31.2461	30.994	30.884	7.96	29.1346	31.6005	31.6648	31.1686	30.4233	31.2525	31.0005	7.96	29.8757
8	31.2977	31.2719	31.2073	31.0523	30.9488	8	30.6766	32.6762	33.0007	31.7548	31.652	31.2654	8	30.6766	32.6762	33.0007	31.9602	31.2654	30.9746		8	27.3299	31.9538	30.7479	30.2606	30.4818	8	29.1938	31.6584	31.6262	31.0458	30.7933	8	29.1938	31.6584	31.6713	31.2654	31.0135	31.0846	8	29.1938	31.6584	31.6713	31.1557	30.4233	31.1815	30.994	8	29.8953
8.04	31.2977	31.2138	31.2073	31.0458	30.994	8.04	30.6701	32.7336	33.0198	31.8383	31.6455	31.3235	8.04	30.6701	32.7336	33.0198	31.9795	31.2912	31.0264		8.04	27.3232	31.9089	30.7609	30.2606	30.4233	8.04	29.1938	31.652	31.6713	31.0523	30.8516	8.04	29.1938	31.652	31.697	31.2848	31.1104	30.994	8.04	29.1938	31.652	31.697	31.1815	30.4623	31.2073	30.9164	8.04	29.8822
8.08	31.3041	31.2719	31.2525	31.091	31.0135	8.08	30.722	32.7017	32.969	31.8704	31.6648	31.3041	8.08	30.722	32.7017	32.969	31.8897	31.3106	30.8905		8.08	27.3299	31.8704	30.7868	30.215	30.4818	8.08	29.2333	31.5876	31.7291	31.0717	30.9164	8.08	29.2333	31.5876	31.6327	31.3235	31.104	31.0393	8.08	29.2333	31.5876	31.6327	31.2073	30.5727	31.175	30.9293	8.08	29.8626
8.12	31.3493	31.2783	31.2525	31.2073	31.0264	8.12	30.7479	32.6571	33.0579	31.8897	31.7163	31.3364	8.12	30.7479	32.6571	33.0579	31.9025	31.4009	30.9164		8.12	27.3366	31.8832	30.7933	30.2475	30.4818	8.12	29.253	31.5812	31.7998	31.0458	30.8905	8.12	29.253	31.5812	31.6455	31.3041	31.1686	31.0846	8.12	29.253	31.5812	31.6455	31.2267	30.5273	31.1621	30.994	8.12	29.9018
8.16	31.3428	31.3106	31.3428	31.1621	31.0393	8.16	30.709	32.638	33.0325	31.8961	31.742	31.3235	8.16	30.709	32.638	33.0325	31.9923	31.4073	31.1492		8.16	27.3232	31.9474	30.8516	30.2606	30.4948	8.16	29.2333	31.652	31.7934	31.0652	30.7933	8.16	29.2333	31.652	31.7227	31.2783	31.1557	31.0975	8.16	29.2333	31.652	31.7227	31.0587	30.5727	31.2009	31.0005	8.16	29.8887
8.2	31.2977	31.317	31.2912	31.1815	31.0523	8.2	30.7415	32.6125	33.0325	31.9025	31.7291	31.3493	8.2	30.7415	32.6125	33.0325	32.0756	31.3944	31.175		8.2	27.3031	31.9859	30.8516	30.2736	30.5078	8.2	29.2333	31.6391	31.7677	31.091	30.8063	8.2	29.2333	31.6391	31.7034	31.388	31.1298	31.1169	8.2	29.2333	31.6391	31.7034	31.0781	30.5013	31.1815	31.0458	8.2	29.8953
8.28	31.3686	31.3428	31.3557	31.2009	31.1104	8.28	30.7285	32.6571	33.0389	31.9089	31.7741	31.3815	8.28	30.7285	32.6571	33.0389	32.0692	31.2332	31.0329		8.28	27.2362	31.9923	30.8711	30.3192	30.5143	8.28	29.2793	31.5812	31.8447	31.0717	30.8128	8.28	29.2793	31.5812	31.5941	31.3815	31.175	31.0975	8.28	29.2793	31.5812	31.5941	31.2267	30.5403	31.2202	31.091	8.28	29.9867
8.32	31.3557	31.3235	31.388	31.2267	31.0781	8.32	30.7544	32.6507	33.0579	32.0436	31.7677	31.4073	8.32	30.7544	32.6507	33.0579	32.0436	31.2719	31.1104		8.32	27.3567	31.9987	30.8451	30.3192	30.4883	8.32	29.2662	31.6198	31.7612	31.0329	30.8192	8.32	29.2662	31.6198	31.6841	31.3815	31.1104	31.0846	8.32	29.2662	31.6198	31.6841	31.2719	30.5597	31.2525	31.007	8.32	29.9541
8.36	31.4073	31.4009	31.4073	31.2461	31.0846	8.36	30.8516	32.6953	33.0897	32.1076	31.7548	31.4073	8.36	30.8516	32.6953	33.0897	32.0564	31.3235	31.091		8.36	27.3633	32.0308	30.9164	30.3387	30.5987	8.36	29.2464	31.6841	31.7291	31.1686	30.9552	8.36	29.2464	31.6841	31.7163	31.4266	31.1686	31.0975	8.36	29.2464	31.6841	31.7163	31.2202	30.5727	31.2848	31.0458	8.36	29.9083
8.4	31.4009	31.3815	31.446	31.2654	31.0523	8.4	30.8128	32.6953	33.096	32.0051	31.7869	31.4138	8.4	30.8128	32.6953	33.096	32.0628	31.2783	31.0393		8.4	27.4035	32.0179	30.8775	30.3322	30.5987	8.4	29.2201	31.5876	31.8897	31.1298	30.7868	8.4	29.2201	31.5876	31.7612	31.4395	31.1815	31.1104	8.4	29.2201	31.5876	31.7612	31.259	30.5597	31.3041	31.0523	8.4	29.8887
8.44	31.3622	31.3428	31.4911	31.2719	31.091	8.44	30.8192	32.7654	33.096	31.9602	31.7998	31.4717	8.44	30.8192	32.7654	33.096	32.0948	31.4202	31.1298		8.44	27.3165	32.0628	30.8905	30.3777	30.6506	8.44	29.2136	31.5941	31.9731	31.104	30.8192	8.44	29.2136	31.5941	31.7484	31.446	31.2073	31.0781	8.44	29.2136	31.5941	31.7484	31.3428	30.5987	31.3428	31.1169	8.44	29.8822
8.48	31.3944	31.388	31.5104	31.2073	31.1427	8.48	30.7415	32.7972	33.0452	32.0308	31.7998	31.4717	8.48	30.7415	32.7972	33.0452	32.1333	31.4589	31.1169		8.48	27.3299	32.0243	30.8775	30.3973	30.6766	8.48	29.2136	31.6455	31.9025	31.1298	30.8192	8.48	29.2136	31.6455	31.7934	31.4717	31.2138	31.104	8.48	29.2136	31.6455	31.7934	31.3751	30.6377	31.3493	31.0975	8.48	29.8168
8.52	31.3428	31.4138	31.5104	31.2202	31.091	8.52	30.7609	32.81	33.077	31.941	31.8062	31.4846	8.52	30.7609	32.81	33.077	32.1781	31.4138	31.1298		8.52	27.3098	32.0436	30.8646	30.3712	30.6766	8.52	29.2924	31.652	31.9025	31.1492	30.8387	8.52	29.2924	31.652	31.7934	31.504	31.2202	31.1104	8.52	29.2924	31.652	31.7934	31.3686	30.6182	31.2912	31.1298	8.52	29.8691
8.56	31.4653	31.388	31.4009	31.3364	31.1815	8.56	30.7803	32.9117	33.1087	32.1653	31.864	31.4524	8.56	30.7803	32.9117	33.1087	32.2485	31.4653	31.1234		8.56	27.3901	32.0564	30.884	30.3842	30.6831	8.56	29.299	31.7677	31.8897	31.1686	30.8775	8.56	29.299	31.7677	31.8768	31.6005	31.1815	31.0975	8.56	29.299	31.7677	31.8768	31.3944	30.6701	31.2912	31.1944	8.56	29.8757
8.6	31.4589	31.504	31.4395	31.2783	31.317	8.6	30.7739	32.8927	33.1087	32.1269	31.8576	31.4911	8.6	30.7739	32.8927	33.1087	32.2932	31.4589	31.1104		8.6	27.4035	32.0884	30.9876	30.3452	30.735	8.6	29.2859	31.7484	31.9089	31.1686	30.897	8.6	29.2859	31.7484	31.9025	31.446	31.2461	31.0523	8.6	29.2859	31.7484	31.9025	31.3751	30.7155	31.3944	31.1686	8.6	30.0324
8.64	31.4717	31.4975	31.4331	31.2719	31.188	8.64	30.8063	32.8609	33.2229	32.2293	31.8961	31.5233	8.64	30.8063	32.8609	33.2229	32.274	31.504	31.1169		8.64	27.3633	32.1076	30.9876	30.4038	30.7479	8.64	29.3056	31.7934	31.9602	31.2654	30.9229	8.64	29.3056	31.7934	31.9538	31.504	31.2783	30.9746	8.64	29.3056	31.7934	31.9538	31.3944	30.7025	31.388	31.2073	8.64	30.0128
8.68	31.4266	31.5361	31.4911	31.3686	31.1944	8.68	30.8581	32.9308	33.2483	32.114	31.9282	31.5555	8.68	30.8581	32.9308	33.2483	32.1909	31.549	31.2073		8.68	27.3901	32.1269	31.0264	30.4428	30.6961	8.68	29.2793	31.7548	31.9731	31.3106	30.9746	8.68	29.2793	31.7548	31.9731	31.4911	31.3299	31.175	8.68	29.2793	31.7548	31.9731	31.5297	30.6961	31.446	31.2073	8.68	29.9932
8.72	31.4138	31.5297	31.4524	31.3622	31.0587	8.72	30.8711	32.9054	33.2483	32.2101	31.9089	31.5426	8.72	30.8711	32.9054	33.2483	32.274	31.5941	31.2267		8.72	27.4636	32.05	31.0199	30.4103	30.7155	8.72	29.299	31.7484	31.9795	31.3493	30.9811	8.72	29.299	31.7484	31.9153	31.4975	31.2848	31.091	8.72	29.299	31.7484	31.9153	31.4524	30.7155	31.388	31.2138	8.72	30.0128
8.76	31.4331	31.5941	31.5104	31.4331	31.0975	8.76	30.9488	32.9499	33.2483	32.2549	31.9282	31.549	8.76	30.9488	32.9499	33.2483	32.3252	31.5876	31.3622		8.76	27.4569	32.0692	31.0329	30.6506	30.6961	8.76	29.2727	31.7291	32.0115	31.317	30.994	8.76	29.2727	31.7291	31.9217	31.5555	31.2654	31.1298	8.76	29.2727	31.7291	31.9217	31.4524	30.7544	31.4589	31.2202	8.76	29.9541
8.8	31.504	31.5941	31.4975	31.4395	31.1686	8.8	31.0781	32.9626	33.2292	32.2549	31.8704	31.6648	8.8	31.0781	32.9626	33.2292	32.3252	31.5619	31.2783		8.8	27.3834	32.0884	31.0781	30.5532	30.6701	8.8	29.2727	31.7291	32.0051	31.3299	30.9682	8.8	29.2727	31.7291	31.9538	31.5619	31.2073	31.2009	8.8	29.2727	31.7291	31.9538	31.446	30.709	31.5683	31.1815	8.8	30.0128
8.84	31.5941	31.5619	31.5297	31.4266	31.1492	8.84	31.0975	32.9308	33.2419	32.1781	31.9025	31.6648	8.84	31.0975	32.9308	33.2419	32.3316	31.5104	31.2912		8.84	27.4102	32.1269	31.0587	30.5597	30.7739	8.84	29.345	31.6777	32.0243	31.3751	30.9876	8.84	29.345	31.6777	32.0308	31.5619	31.2783	31.1815	8.84	29.345	31.6777	32.0308	31.4589	30.7544	31.5361	31.1815	8.84	29.9671
8.88	31.6069	31.6005	31.6391	31.4009	31.2848	8.88	31.0781	33.0452	33.2673	32.1909	31.9153	31.6262	8.88	31.0781	33.0452	33.2673	32.2932	31.5426	31.3428		8.88	27.5705	32.1333	31.0458	30.5403	30.7868	8.88	29.3253	31.7034	31.9923	31.2848	31.0587	8.88	29.3253	31.7034	31.9987	31.6262	31.259	31.1104	8.88	29.3253	31.7034	31.9987	31.4846	30.7479	31.5555	31.1815	8.88	29.8887
8.92	31.5876	31.6134	31.6005	31.4009	31.3106	8.92	31.0523	33.0134	33.2609	32.2037	31.9089	31.6327	8.92	31.0523	33.0134	33.2609	32.2612	31.5941	31.259		8.92	27.5238	32.114	31.1234	30.5597	30.6701	8.92	29.3516	31.819	32.1076	31.3686	31.0846	8.92	29.3516	31.819	31.9923	31.5876	31.2719	31.1944	8.92	29.3516	31.819	31.9923	31.504	30.7479	31.549	31.2073	8.92	29.8953
8.96	31.5748	31.6069	31.5748	31.388	31.2654	8.96	31.0975	32.988	33.318	32.2676	31.9795	31.5812	8.96	31.0975	32.988	33.318	32.2101	31.7163	31.2332		8.96	27.4703	32.1269	31.1169	30.5727	30.7025	8.96	29.3713	31.819	32.0884	31.4073	31.0975	8.96	29.3713	31.819	31.9987	31.6262	31.3557	31.175	8.96	29.3713	31.819	31.9987	31.5233	30.7739	31.5876	31.2525	8.96	29.9606
9	31.5941	31.6713	31.5876	31.3428	31.2009	9	31.104	32.988	33.3116	32.3635	31.9859	31.6327	9	31.104	32.988	33.3116	32.2101	31.5876	31.3106		9	27.4503	32.2165	31.1427	30.5857	30.7803	9	29.391	31.819	32.1653	31.4073	31.1104	9	29.391	31.819	32.0308	31.6841	31.3364	31.1944	9	29.391	31.819	32.0308	31.5361	30.7998	31.6005	31.2783	9	29.9802
9.04	31.6198	31.6777	31.6327	31.317	31.2202	9.04	31.0975	32.8927	33.356	32.3635	31.9923	31.6262	9.04	31.0975	32.8927	33.356	32.3699	31.6584	31.4009		9.04	27.4168	32.2165	31.1169	30.5792	30.7544	9.04	29.45	31.8126	32.1076	31.4009	31.1169	9.04	29.45	31.8126	32.0372	31.6841	31.3493	31.1944	9.04	29.45	31.8126	32.0372	31.5555	30.7803	31.7291	31.317	9.04	29.9345
9.12	31.6069	31.6455	31.6262	31.4202	31.2525	9.12	31.0393	32.9944	33.356	32.4146	32.05	31.6134	9.12	31.0393	32.9944	33.356	32.453	31.6584	31.4073		9.12	27.4168	32.2357	31.175	30.5922	30.7933	9.12	29.4435	31.8704	32.0308	31.4202	31.1363	9.12	29.4435	31.8704	32.0372	31.7163	31.3106	31.259	9.12	29.4435	31.8704	32.0372	31.5426	30.7933	31.6584	31.3041	9.12	30.0781
9.16	31.652	31.7291	31.6777	31.3815	31.2073	9.16	31.0523	32.9054	33.3813	32.3316	32.0628	31.6584	9.16	31.0523	32.9054	33.3813	32.5104	31.6455	31.3235		9.16	27.4703	32.2229	31.1234	30.5922	30.8063	9.16	29.4435	31.9025	32.1269	31.4202	31.1686	9.16	29.4435	31.9025	32.1012	31.7034	31.4009	31.2977	9.16	29.4435	31.9025	32.1012	31.5748	30.7933	31.652	31.3751	9.16	30.0063
9.2	31.7034	31.7805	31.7612	31.4202	31.2977	9.2	31.0523	32.9181	33.3877	32.4721	32.0372	31.7034	9.2	31.0523	32.9181	33.3877	32.5487	31.6905	31.4331		9.2	27.4837	32.2612	31.0781	30.5792	30.8128	9.2	29.4566	31.9217	32.1525	31.5812	31.188	9.2	29.4566	31.9217	32.1269	31.742	31.4717	31.3106	9.2	29.4566	31.9217	32.1269	31.5555	30.8063	31.6327	31.317	9.2	30.0063
9.24	31.6648	31.7677	31.819	31.4589	31.3493	9.24	31.0846	33.0643	33.432	32.4338	32.0564	31.742	9.24	31.0846	33.0643	33.432	32.421	31.7548	31.4653		9.24	27.6372	32.2868	31.1363	30.6247	30.8387	9.24	29.4172	32.0179	32.1461	31.4202	31.2654	9.24	29.4172	32.0179	32.3444	31.7163	31.5361	31.2977	9.24	29.4172	32.0179	32.3444	31.6198	30.8905	31.6905	31.3364	9.24	30.0259
9.28	31.7869	31.7677	31.7934	31.4846	31.4395	9.28	31.1427	33.1087	33.451	32.421	32.0115	31.7484	9.28	31.1427	33.1087	33.451	32.504	31.742	31.4073		9.28	27.5905	32.2421	31.1686	30.6766	30.9034	9.28	29.3713	31.9987	32.1973	31.4524	31.2977	9.28	29.3713	31.9987	32.1525	31.7612	31.504	31.3299	9.28	29.3713	31.9987	32.1525	31.6262	30.8581	31.6069	31.4266	9.28	30.0389
9.32	31.7741	31.7934	31.7869	31.549	31.446	9.32	31.1298	33.1404	33.432	32.3955	32.0948	31.7869	9.32	31.1298	33.1404	33.432	32.4594	31.7548	31.4717		9.32	27.5371	32.2485	31.2525	30.735	30.884	9.32	29.4238	32.0051	32.3188	31.4717	31.2267	9.32	29.4238	32.0051	32.1333	31.7612	31.4717	31.2267	9.32	29.4238	32.0051	32.1333	31.6905	30.8646	31.7227	31.4009	9.32	30.0781
9.36	31.7612	31.8255	31.8062	31.5297	31.446	9.36	31.2783	33.1341	33.5079	32.3891	32.2165	31.9025	9.36	31.2783	33.1341	33.5079	32.4977	31.7612	31.5104		9.36	27.5371	32.2804	31.1815	30.722	30.884	9.36	29.5418	31.9987	32.3316	31.5233	31.2912	9.36	29.5418	31.9987	32.2229	31.8512	31.6134	31.3944	9.36	29.5418	31.9987	32.2229	31.742	31.0135	31.7355	31.4395	9.36	30.2606
9.4	31.7805	31.8319	31.864	31.5748	31.5104	9.4	31.175	33.1277	33.5142	32.5487	32.2101	31.8961	9.4	31.175	33.1277	33.5142	32.4594	31.8062	31.504		9.4	27.5705	32.2357	31.1944	30.6896	30.8646	9.4	29.4894	31.9987	32.2868	31.4202	31.2654	9.4	29.4894	31.9987	32.2357	31.8897	31.6134	31.4073	9.4	29.4894	31.9987	32.2357	31.6327	31.0264	31.864	31.4975	9.4	30.241
9.44	31.8062	31.9474	31.9025	31.6069	31.4975	9.44	31.2525	33.1785	33.5079	32.4594	32.2101	31.7998	9.44	31.2525	33.1785	33.5079	32.4849	31.7934	31.5297		9.44	27.5238	32.2868	31.1621	30.7155	30.9034	9.44	29.4959	32.0692	32.3508	31.5233	31.2719	9.44	29.4959	32.0692	32.2357	31.9731	31.652	31.3944	9.44	29.4959	32.0692	32.2357	31.6713	31.0652	31.8447	31.504	9.44	30.3127
9.48	31.8062	31.9089	31.9731	31.6648	31.4782	9.48	31.259	33.2039	33.4193	32.4657	32.2101	31.9346	9.48	31.259	33.2039	33.4193	32.4913	31.8704	31.5683		9.48	27.497	32.2932	31.1621	30.7025	30.9682	9.48	29.4631	32.0372	32.306	31.5361	31.3235	9.48	29.4631	32.0372	32.2229	31.8768	31.6327	31.3944	9.48	29.4631	32.0372	32.2229	31.7677	31.0329	31.8512	31.4009	9.48	30.2931
9.52	31.7677	31.9153	31.9153	31.7098	31.5168	9.52	31.2525	33.2102	33.5711	32.6444	32.3188	31.8512	9.52	31.2525	33.2102	33.5711	32.5551	31.7484	31.5426		9.52	27.4369	32.338	31.2009	30.7609	30.9746	9.52	29.5353	32.1397	32.2804	31.5683	31.3751	9.52	29.5353	32.1397	32.2421	31.8768	31.5683	31.4138	9.52	29.5353	32.1397	32.2421	31.7355	31.0523	31.8704	31.3944	9.52	30.2931
9.56	31.7869	31.9282	31.9025	31.6841	31.5555	9.56	31.1944	33.2229	33.5459	32.7654	32.3188	31.8704	9.56	31.1944	33.2229	33.5459	32.5806	31.8576	31.5619		9.56	27.3968	32.3571	31.1944	30.709	31.0393	9.56	29.5353	32.1204	32.2165	31.5748	31.2073	9.56	29.5353	32.1204	32.2932	31.864	31.5683	31.4975	9.56	29.5353	32.1204	32.2932	31.6391	31.0523	31.8319	31.4331	9.56	30.3192
9.6	31.7484	31.8768	31.9217	31.7741	31.5168	9.6	31.2073	33.1975	33.5395	32.7527	32.3188	31.8062	9.6	31.2073	33.1975	33.5395	32.5296	31.8319	31.5748		9.6	27.5104	32.2676	31.2912	30.735	31.0135	9.6	29.5877	32.1397	32.2485	31.6455	31.2138	9.6	29.5877	32.1397	32.306	31.941	31.6648	31.6005	9.6	29.5877	32.1397	32.306	31.7548	31.1621	31.8062	31.4266	9.6	30.3127
9.64	31.7227	31.9025	31.9025	31.7805	31.5426	9.64	31.2073	33.2419	33.6027	32.6953	32.4019	31.8383	9.64	31.2073	33.2419	33.6027	32.5678	31.7869	31.6198		9.64	27.5171	32.2868	31.2461	30.7025	31.0135	9.64	29.5025	32.1012	32.3891	31.6905	31.2332	9.64	29.5025	32.1012	32.3444	31.9025	31.6777	31.5812	9.64	29.5025	32.1012	32.3444	31.7163	31.0393	31.8961	31.4073	9.64	30.2866
9.68	31.7612	31.9538	31.9153	31.8126	31.6455	9.68	31.2654	33.28	33.647	32.7081	32.3699	31.8832	9.68	31.2654	33.28	33.647	32.6061	31.8576	31.6327		9.68	27.5037	32.3635	31.2912	30.6766	31.0199	9.68	29.5222	32.0884	32.3508	31.6584	31.2719	9.68	29.5222	32.0884	32.3316	31.8897	31.6262	31.5619	9.68	29.5222	32.0884	32.3316	31.742	31.1492	31.8961	31.4138	9.68	30.2801
9.72	31.742	31.9474	31.8832	31.9153	31.6777	9.72	31.1686	33.3433	33.6091	32.5423	32.3252	31.8897	9.72	31.1686	33.3433	33.6091	32.6507	31.8319	31.5812		9.72	27.5104	32.3316	31.3815	30.6636	30.9811	9.72	29.5222	32.1333	32.3444	31.6584	31.3235	9.72	29.5222	32.1333	32.306	31.8768	31.6005	31.6134	9.72	29.5222	32.1333	32.306	31.8126	31.1169	31.8897	31.504	9.72	30.2866
9.76	31.742	31.9602	31.8576	31.9025	31.6455	9.76	31.2525	33.2609	33.6217	32.5296	32.3635	31.9282	9.76	31.2525	33.2609	33.6217	32.6189	31.9474	31.5426		9.76	27.477	32.421	31.3557	30.7155	30.9811	9.76	29.6336	32.05	32.3635	31.6455	31.4202	9.76	29.6336	32.05	32.3508	31.8832	31.697	31.549	9.76	29.6336	32.05	32.3508	31.8383	31.2009	31.9282	31.5683	9.76	30.3452
9.8	31.7805	31.9666	31.941	31.8832	31.6455	9.8	31.2654	33.3243	33.7165	32.5806	32.3316	32.0051	9.8	31.2654	33.3243	33.7165	32.6316	31.941	31.5555		9.8	27.6239	32.421	31.504	30.7285	31.007	9.8	29.627	32.1012	32.3955	31.6262	31.4202	9.8	29.627	32.1012	32.3955	31.9474	31.7163	31.5941	9.8	29.627	32.1012	32.3955	31.8897	31.175	31.9538	31.5941	9.8	30.3452
9.84	31.8062	31.9666	31.9923	31.8383	31.549	9.84	31.1621	33.2609	33.7291	32.6125	32.3252	31.9795	9.84	31.1621	33.2609	33.7291	32.6571	31.9731	31.4911		9.84	27.6372	32.421	31.5426	30.7674	31.0005	9.84	29.6663	32.0884	32.3827	31.6777	31.4395	9.84	29.6663	32.0884	32.3635	31.9538	31.7484	31.5426	9.84	29.6663	32.0884	32.3635	31.8126	31.1815	31.9731	31.6905	9.84	30.3647
9.92	31.8383	31.9666	32.0628	31.8062	31.6005	9.92	31.2461	33.1404	33.6722	32.6189	32.2037	32.0115	9.92	31.2461	33.1404	33.6722	32.689	31.9474	31.5812		9.92	27.6372	32.4338	31.5683	30.9358	31.007	9.92	29.5418	32.114	32.4146	31.6841	31.3944	9.92	29.5418	32.114	32.4466	31.9474	31.7548	31.5297	9.92	29.5418	32.114	32.4466	31.8512	31.175	31.9987	31.7355	9.92	30.3517
9.96	31.8383	31.9859	32.0564	31.7869	31.4975	9.96	31.2267	33.2039	33.6912	32.6826	32.2804	32.0308	9.96	31.2267	33.2039	33.6912	32.689	31.9346	31.6584		9.96	27.6172	32.4657	31.6134	30.9617	31.0587	9.96	29.6336	32.1269	32.4083	31.742	31.4266	9.96	29.6336	32.1269	32.421	32.1076	31.7291	31.5104	9.96	29.6336	32.1269	32.421	31.8255	31.1557	31.9987	31.6198	9.96	30.4168
10	31.8062	32.0308	32.082	31.8447	31.5555	10	31.3299	33.2166	33.6659	32.6762	32.3444	32.0436	10	31.3299	33.2166	33.6659	32.7017	31.9346	31.6584		10	27.6372	32.4657	31.5361	30.9876	31.104	10	29.7645	32.1204	32.3763	31.742	31.4138	10	29.7645	32.1204	32.421	32.1781	31.7227	31.6005	10	29.7645	32.1204	32.421	31.9474	31.188	31.9346	31.6713	10	30.3777
10.04	31.8319	32.0948	32.0179	31.8897	31.6005	10.04	31.2848	33.3813	33.6849	32.6762	32.4019	32.0308	10.04	31.2848	33.3813	33.6849	32.8545	31.9474	31.7163		10.04	27.6639	32.3955	31.4266	30.9423	31.0975	10.04	29.7187	32.1269	32.5296	31.7355	31.4009	10.04	29.7187	32.1269	32.3508	32.1717	31.7741	31.6327	10.04	29.7187	32.1269	32.3508	31.9282	31.1557	31.9474	31.7484	10.04	30.4103
10.08	31.8704	32.1333	31.9923	31.8961	31.742	10.08	31.2202	33.3813	33.6722	32.6826	32.4402	32.1269	10.08	31.2202	33.3813	33.6722	32.9054	31.9731	31.7034		10.08	27.6906	32.4274	31.504	30.9876	31.1557	10.08	29.6598	32.1845	32.453	31.8447	31.5233	10.08	29.6598	32.1845	32.4083	32.1333	31.8062	31.6134	10.08	29.6598	32.1845	32.4083	31.9346	31.2783	31.9923	31.6777	10.08	30.3777
10.12	31.9474	32.1333	32.0436	31.8961	31.7998	10.12	31.4331	33.3116	33.6849	32.7399	32.4466	32.114	10.12	31.4331	33.3116	33.6849	32.9117	31.9474	31.7355		10.12	27.6172	32.4721	31.5683	30.9488	31.1944	10.12	29.7187	32.1781	32.4338	31.8704	31.5361	10.12	29.7187	32.1781	32.3508	32.1525	31.8319	31.5297	10.12	29.7187	32.1781	32.3508	31.8897	31.317	32.0243	31.6841	10.12	30.4103
10.16	31.8897	32.1845	32.0692	31.8383	31.7548	10.16	31.3815	33.3433	33.7922	32.7781	32.4466	32.1781	10.16	31.3815	33.3433	33.7922	32.899	32.0243	31.7869		10.16	27.6639	32.5168	31.5941	31.0587	31.1944	10.16	29.7383	32.2676	32.4977	31.8576	31.5104	10.16	29.7383	32.2676	32.3763	32.1717	31.8319	31.5555	10.16	29.7383	32.2676	32.3763	31.9987	31.2912	32.0372	31.7484	10.16	30.4298
10.2	31.9346	32.1461	32.0884	31.8576	31.7869	10.2	31.4266	33.3877	33.9372	32.7718	32.5232	32.0756	10.2	31.4266	33.3877	33.9372	32.8927	32.0436	31.7741		10.2	27.6506	32.5232	31.5812	30.9682	31.1557	10.2	29.771	32.2101	32.5168	31.8832	31.5168	10.2	29.771	32.2101	32.504	32.114	31.9025	31.6777	10.2	29.771	32.2101	32.504	31.819	31.188	32.0179	31.7355	10.2	30.3712
10.24	31.8576	32.1717	32.0948	32.0308	31.7805	10.24	31.3493	33.4193	33.912	32.8291	32.5806	32.082	10.24	31.3493	33.4193	33.912	32.8799	32.1717	31.7355		10.24	27.7306	32.5423	31.5426	31.0135	31.2396	10.24	29.7318	32.2101	32.5678	31.8512	31.446	10.24	29.7318	32.2101	32.5615	32.1397	31.941	31.6905	10.24	29.7318	32.2101	32.5615	31.8961	31.2396	32.0884	31.7741	10.24	30.3322
10.28	32.0115	32.1012	32.1397	32.0115	31.7098	10.28	31.4138	33.4763	33.9624	32.8354	32.587	32.114	10.28	31.4138	33.4763	33.9624	32.8799	32.1653	31.7869		10.28	27.7439	32.5359	31.5555	31.0523	31.259	10.28	29.7056	32.2421	32.587	31.9025	31.4975	10.28	29.7056	32.2421	32.5742	32.2101	31.9666	31.652	10.28	29.7056	32.2421	32.5742	31.9731	31.2525	32.0628	31.7934	10.28	30.3777
10.32	31.9987	32.1204	32.2101	31.9666	31.7227	10.32	31.4782	33.5016	33.9498	32.8163	32.5551	32.1012	10.32	31.4782	33.5016	33.9498	33.0071	32.1333	31.7869		10.32	27.7639	32.5232	31.6841	31.0717	31.2654	10.32	29.7318	32.3955	32.6252	31.8897	31.504	10.32	29.7318	32.3955	32.5933	32.2037	32.0115	31.6584	10.32	29.7318	32.3955	32.5933	31.9987	31.3428	32.1012	31.7869	10.32	30.4168
10.36	32.0372	32.1461	32.2421	31.9538	31.7291	10.36	31.388	33.5711	33.9372	32.8418	32.5487	32.1717	10.36	31.388	33.5711	33.9372	32.9372	32.1461	31.7677		10.36	27.7506	32.5487	31.7227	31.0652	31.2461	10.36	29.7383	32.4146	32.6189	31.9217	31.5168	10.36	29.7383	32.4146	32.5487	32.2421	32.0564	31.697	10.36	29.7383	32.4146	32.5487	32.05	31.317	32.1012	31.7677	10.36	30.4753
10.4	32.0756	32.2421	32.2612	31.9602	31.7355	10.4	31.3686	33.5459	33.9435	32.8227	32.5742	32.1909	10.4	31.3686	33.5459	33.9435	32.9245	32.1589	31.7741		10.4	27.8505	32.6698	31.7098	31.0781	31.259	10.4	29.7449	32.4019	32.5933	31.9089	31.5168	10.4	29.7449	32.4019	32.5933	32.2868	32.0179	31.742	10.4	29.7449	32.4019	32.5933	31.941	31.317	32.2037	31.8255	10.4	30.4818
10.44	32.05	32.2676	32.2421	32.0436	31.7548	10.44	31.504	33.5079	33.9687	32.969	32.5997	32.1909	10.44	31.504	33.5079	33.9687	32.8736	32.1717	31.8832		10.44	27.8705	32.6061	31.6841	31.0523	31.2719	10.44	29.7645	32.3699	32.6125	31.8897	31.5876	10.44	29.7645	32.3699	32.6125	32.3124	32.0051	31.7612	10.44	29.7645	32.3699	32.6125	32.1525	31.3235	32.1204	31.8319	10.44	30.4428
10.48	32.05	32.2293	32.1781	32.05	31.7869	10.48	31.5297	33.4826	33.9687	32.9181	32.5933	32.1781	10.48	31.5297	33.4826	33.9687	32.899	32.2868	31.9153		10.48	27.8439	32.6189	31.6262	31.0264	31.259	10.48	29.758	32.3571	32.6826	31.9859	31.5619	10.48	29.758	32.3571	32.689	32.2932	31.9923	31.8319	10.48	29.758	32.3571	32.689	32.1269	31.3299	32.1717	31.8255	10.48	30.4753
10.52	32.1076	32.2804	32.2549	32.05	31.8961	10.52	31.4653	33.4763	33.975	32.9626	32.5615	32.3252	10.52	31.4653	33.4763	33.975	33.0007	32.2485	31.9025		10.52	27.8106	32.6125	31.6005	31.0781	31.259	10.52	29.7972	32.3635	32.7208	31.9795	31.549	10.52	29.7972	32.3635	32.7208	32.3699	32.05	31.8447	10.52	29.7972	32.3635	32.7208	32.1397	31.3557	32.1973	31.7098	10.52	30.4818
10.56	32.1076	32.2676	32.2549	32.0628	31.9089	10.56	31.4717	33.7165	33.9561	33.0071	32.5933	32.274	10.56	31.4717	33.7165	33.9561	32.9435	32.2868	31.8576		10.56	27.7773	32.6061	31.6905	31.1298	31.2396	10.56	29.8299	32.2996	32.7272	31.9346	31.5683	10.56	29.8299	32.2996	32.7017	32.3316	31.9731	31.8512	10.56	29.8299	32.2996	32.7017	32.0884	31.3686	32.0884	31.7805	10.56	30.4818
10.6	32.1269	32.2996	32.2293	32.1525	31.9987	10.6	31.4782	33.6975	33.9624	33.0007	32.7272	32.2932	10.6	31.4782	33.6975	33.9624	32.969	32.2612	31.8255		10.6	27.7639	32.6252	31.7484	31.1234	31.2461	10.6	29.8234	32.274	32.7654	31.9666	31.6777	10.6	29.8234	32.274	32.7144	32.338	31.9346	31.9217	10.6	29.8234	32.274	32.7144	32.1397	31.3815	32.2676	31.8062	10.6	30.4688
10.64	32.114	32.3124	32.2293	32.1269	31.9731	10.64	31.504	33.7543	33.9372	33.0325	32.7399	32.2101	10.64	31.504	33.7543	33.9372	33.0007	32.274	31.8126		10.64	27.7706	32.6571	31.8062	31.1621	31.2332	10.64	29.8168	32.3508	32.7845	32.0051	31.7355	10.64	29.8168	32.3508	32.7399	32.3635	32.0051	31.8383	10.64	29.8168	32.3508	32.7399	32.1333	31.3815	32.1653	31.8512	10.64	30.4883
10.68	32.1076	32.3188	32.2549	32.114	31.9859	10.68	31.446	33.83	33.9246	32.9499	32.7144	32.2549	10.68	31.446	33.83	33.9246	33.0325	32.2612	31.8768		10.68	27.9104	32.6507	31.8126	31.0846	31.259	10.68	29.8168	32.3891	32.7208	31.9859	31.742	10.68	29.8168	32.3891	32.7399	32.4338	32.0308	31.8768	10.68	29.8168	32.3891	32.7399	32.1589	31.4138	32.3124	31.9282	10.68	30.4623
10.76	32.1397	32.4019	32.2996	32.1333	31.9282	10.76	31.5233	33.767	33.9813	32.9817	32.7272	32.3571	10.76	31.5233	33.767	33.9813	33.0516	32.2421	31.8897		10.76	27.7773	32.6762	31.8704	31.188	31.3299	10.76	29.8234	32.4019	32.7272	32.0436	31.6777	10.76	29.8234	32.4019	32.7272	32.421	32.0756	31.8832	10.76	29.8234	32.4019	32.7272	32.2229	31.4073	32.3316	31.9282	10.76	30.4363
10.8	32.1717	32.759	32.306	32.1589	31.8832	10.8	31.5748	33.7101	33.9813	32.969	32.7272	32.4146	10.8	31.5748	33.7101	33.9813	33.1404	32.2612	31.9795		10.8	27.7506	32.6507	31.9282	31.1944	31.3557	10.8	29.856	32.4913	32.7399	32.0628	31.6134	10.8	29.856	32.4913	32.759	32.4402	32.0884	31.9089	10.8	29.856	32.4913	32.759	32.2229	31.4782	32.3571	31.9538	10.8	30.5143
10.84	32.1461	32.5168	32.2996	32.1589	31.9089	10.84	31.6005	33.6849	34.0506	32.9308	32.7208	32.4274	10.84	31.6005	33.6849	34.0506	33.1341	32.1973	31.9346		10.84	27.8572	32.6953	31.9089	31.2912	31.4073	10.84	29.7776	32.4657	32.7972	32.1269	31.6327	10.84	29.7776	32.4657	32.8418	32.453	32.1076	31.9346	10.84	29.7776	32.4657	32.8418	32.2357	31.4911	32.2612	31.9089	10.84	30.5273
10.88	32.0692	32.453	32.3827	32.1589	31.9025	10.88	31.5941	33.6849	34.1009	33.096	32.7208	32.421	10.88	31.5941	33.6849	34.1009	33.0897	32.1717	31.9538		10.88	27.8572	32.7208	31.9089	31.2848	31.4202	10.88	29.8103	32.421	32.7845	32.0948	31.6777	10.88	29.8103	32.421	32.81	32.421	32.2037	31.9666	10.88	29.8103	32.421	32.81	32.2932	31.5104	32.2293	32.0243	10.88	30.5338
10.92	32.114	32.4721	32.4721	32.1012	31.8897	10.92	31.5426	33.6596	33.9876	33.0007	32.7208	32.4083	10.92	31.5426	33.6596	33.9876	33.1277	32.2037	31.9602		10.92	27.8305	32.7208	31.864	31.2783	31.4138	10.92	29.8168	32.3827	32.8291	32.0564	31.7355	10.92	29.8168	32.3827	32.7654	32.4657	32.1589	32.0051	10.92	29.8168	32.3827	32.7654	32.2868	31.4782	32.306	32.0436	10.92	30.5143
10.96	32.1397	32.453	32.4785	32.1781	31.9731	10.96	31.6069	33.6849	34.0191	33.1024	32.7399	32.4146	10.96	31.6069	33.6849	34.0191	33.1785	32.2229	31.9795		10.96	27.8039	32.7336	31.7998	31.2461	31.4266	10.96	29.8691	32.4594	32.7654	32.0308	31.819	10.96	29.8691	32.4594	32.7654	32.504	32.2037	31.9859	10.96	29.8691	32.4594	32.7654	32.3571	31.4975	32.2996	31.9859	10.96	30.5468
11	32.1845	32.4657	32.5487	32.1973	31.9666	11	31.6327	33.7354	34.1072	33.2166	32.7909	32.4402	11	31.6327	33.7354	34.1072	33.299	32.3508	32.0243		11	28.0102	32.7654	31.8704	31.2654	31.5683	11	29.9083	32.5806	32.8418	32.0372	31.8319	11	29.9083	32.5806	32.9181	32.5232	32.2549	32.0628	11	29.9083	32.5806	32.9181	32.3635	31.5812	32.4083	32.0692	11	30.6377
11.04	32.2357	32.5168	32.6189	32.1653	32.0948	11.04	31.6327	33.7859	34.1261	33.0833	32.8736	32.4402	11.04	31.6327	33.7859	34.1261	33.2229	32.4146	32.0115		11.04	27.957	32.7718	31.9666	31.3751	31.5941	11.04	29.9214	32.4913	32.9245	32.1909	31.864	11.04	29.9214	32.4913	32.9054	32.5933	32.2676	32.0692	11.04	29.9214	32.4913	32.9054	32.3635	31.6777	32.4657	32.0756	11.04	30.6571
11.08	32.2485	32.4721	32.6061	32.2996	32.1076	11.08	31.6841	33.8553	34.1261	33.1087	32.8609	32.4785	11.08	31.6841	33.8553	34.1261	33.2609	32.4019	32.1012		11.08	27.8705	32.8863	32.1397	31.3751	31.5941	11.08	29.8757	32.5615	32.9499	32.2037	31.8961	11.08	29.8757	32.5615	33.0007	32.5742	32.2804	32.1525	11.08	29.8757	32.5615	33.0007	32.4274	31.7034	32.5232	32.05	11.08	30.6701
11.12	32.2676	32.5104	32.587	32.2932	32.1269	11.12	31.7034	33.8616	34.1701	33.1341	32.8672	32.504	11.12	31.7034	33.8616	34.1701	33.1975	32.504	32.1397		11.12	27.8439	32.8736	32.1269	31.4073	31.5941	11.12	29.9083	32.5487	32.9817	32.1333	32.0051	11.12	29.9083	32.5487	32.9563	32.5551	32.338	32.114	11.12	29.9083	32.5487	32.9563	32.4657	31.6841	32.5296	32.0948	11.12	30.6896
11.16	32.306	32.5615	32.6507	32.3955	32.1525	11.16	31.6905	33.8616	34.2079	33.2292	32.9054	32.5678	11.16	31.6905	33.8616	34.2079	33.3053	32.4977	32.1845		11.16	27.7373	32.8672	32.114	31.4138	31.5748	11.16	29.9018	32.5423	32.969	32.1909	32.0051	11.16	29.9018	32.5423	32.9435	32.5232	32.2868	32.0564	11.16	29.9018	32.5423	32.9435	32.5104	31.7098	32.5232	32.114	11.16	30.7674
11.2	32.2996	32.5296	32.6571	32.4146	32.1973	11.2	31.6713	33.8174	34.1953	33.2039	32.8354	32.5678	11.2	31.6713	33.8174	34.1953	33.3497	32.504	32.1461		11.2	27.7639	32.8736	32.0884	31.3686	31.5619	11.2	29.9083	32.5359	32.9372	32.2485	31.9987	11.2	29.9083	32.5359	32.969	32.5296	32.3444	32.0756	11.2	29.9083	32.5359	32.969	32.504	31.6455	32.4977	32.114	11.2	30.722
11.24	32.306	32.5487	32.6953	32.3763	32.1589	11.24	31.6905	33.8174	34.2079	33.1912	32.988	32.5806	11.24	31.6905	33.8174	34.2079	33.2673	32.4913	32.0372		11.24	27.8172	32.8291	32.0884	31.4331	31.5683	11.24	29.9149	32.5423	32.9245	32.338	31.941	11.24	29.9149	32.5423	32.9245	32.6571	32.3635	32.0179	11.24	29.9149	32.5423	32.9245	32.504	31.6455	32.5168	32.1204	11.24	30.7479
11.28	32.3635	32.587	32.7208	32.4338	32.1909	11.28	31.6905	33.9246	34.2204	33.318	32.9626	32.5997	11.28	31.6905	33.9246	34.2204	33.2926	32.4785	32.0372		11.28	27.8039	32.8418	32.082	31.4653	31.5683	11.28	29.9606	32.5615	32.9817	32.2485	31.9666	11.28	29.9606	32.5615	33.0389	32.7272	32.4019	31.9859	11.28	29.9606	32.5615	33.0389	32.587	31.6455	32.5487	32.1973	11.28	30.7544
11.32	32.3571	32.5742	32.6953	32.4402	32.1333	11.32	31.7098	33.9561	34.2581	33.299	33.0389	32.6507	11.32	31.7098	33.9561	34.2581	33.3053	32.504	32.05		11.32	27.8172	32.8481	32.0884	31.4846	31.6391	11.32	29.9867	32.7081	33.0198	32.2293	32.0179	11.32	29.9867	32.7081	33.0007	32.6635	32.4146	32.0115	11.32	29.9867	32.7081	33.0007	32.5997	31.7163	32.5104	32.1909	11.32	30.722
11.36	32.3508	32.587	32.7336	32.4146	32.1012	11.36	31.6905	33.8805	34.3775	33.2483	33.0325	32.6635	11.36	31.6905	33.8805	34.3775	33.337	32.5232	32.114		11.36	27.8239	32.8545	32.05	31.4846	31.5168	11.36	29.9541	32.7208	33.0261	32.2485	31.9923	11.36	29.9541	32.7208	33.0261	32.6698	32.3699	32.0308	11.36	29.9541	32.7208	33.0261	32.6189	31.6777	32.5232	32.1845	11.36	30.7285
11.4	32.3635	32.6061	32.6316	32.4402	32.0884	11.4	31.7484	33.9687	34.4026	33.413	33.0261	32.7081	11.4	31.7484	33.9687	34.4026	33.4003	32.5615	32.1525		11.4	27.8638	32.8672	32.0692	31.4589	31.5683	11.4	29.9736	32.6826	33.0452	32.2357	31.9923	11.4	29.9736	32.6826	33.0198	32.6826	32.4083	32.114	11.4	29.9736	32.6826	33.0198	32.5806	31.7227	32.6125	32.1909	11.4	30.6831
11.44	32.3955	32.6189	32.6444	32.4657	32.2101	11.44	31.864	33.9876	34.3712	33.2673	33.0516	32.6698	11.44	31.864	33.9876	34.3712	33.375	32.587	32.1845		11.44	27.9437	32.8799	32.0948	31.504	31.5941	11.44	29.9606	32.6571	33.1214	32.2421	31.9538	11.44	29.9606	32.6571	33.0516	32.6635	32.4083	32.1012	11.44	29.9606	32.6571	33.0516	32.638	31.7291	32.5615	32.1973	11.44	30.7025
11.48	32.3252	32.5742	32.7017	32.4657	32.1269	11.48	31.8961	33.9561	34.3524	33.2673	33.0833	32.7336	11.48	31.8961	33.9561	34.3524	33.2229	32.6444	32.2101		11.48	27.9371	32.8609	32.0948	31.4717	31.6069	11.48	29.9802	32.6507	33.1087	32.2932	31.9795	11.48	29.9802	32.6507	33.0643	32.6444	32.453	32.1076	11.48	29.9802	32.6507	33.0643	32.6571	31.7869	32.6252	32.1781	11.48	30.6896
11.52	32.3508	32.6189	32.7272	32.4594	32.2612	11.52	31.8383	33.9183	34.4465	33.3497	33.0833	32.7272	11.52	31.8383	33.9183	34.4465	33.2673	32.6762	32.2293		11.52	27.8305	32.8672	32.114	31.4911	31.697	11.52	29.9671	32.7527	33.0643	32.3891	32.0884	11.52	29.9671	32.7527	33.096	32.689	32.4466	32.1653	11.52	29.9671	32.7527	33.096	32.6444	31.7869	32.6061	32.1845	11.52	30.709
11.6	32.3699	32.6571	32.7909	32.453	32.2293	11.6	31.8383	33.9687	34.4402	33.4067	33.0706	32.7972	11.6	31.8383	33.9687	34.4402	33.2863	32.689	32.2485		11.6	27.9504	32.8418	32.1589	31.5426	31.6713	11.6	29.9475	32.8036	33.096	32.4274	32.0884	11.6	29.9475	32.8036	33.096	32.7081	32.4849	32.1781	11.6	29.9475	32.8036	33.096	32.7845	31.8383	32.6571	32.1909	11.6	30.8387
11.64	32.4338	32.6444	32.7654	32.4785	32.2676	11.64	31.8768	34.0128	34.4339	33.3116	33.1024	32.7654	11.64	31.8768	34.0128	34.4339	33.318	32.6125	32.3508		11.64	27.9237	32.8863	32.1909	31.6134	31.6713	11.64	29.9214	32.8799	33.0897	32.4466	32.082	11.64	29.9214	32.8799	33.096	32.8291	32.5232	32.1973	11.64	29.9214	32.8799	33.096	32.6698	31.8255	32.689	32.2165	11.64	30.8451
11.68	32.4146	32.7081	32.8545	32.5997	32.2868	11.68	31.9217	34.0191	34.4967	33.3497	33.1214	32.81	11.68	31.9217	34.0191	34.4967	33.3497	32.5933	32.3316		11.68	27.9836	32.9499	32.1781	31.549	31.6455	11.68	30.0259	32.8036	33.1404	32.3955	32.0884	11.68	30.0259	32.8036	33.1468	32.8291	32.5232	32.338	11.68	30.0259	32.8036	33.1468	32.6444	31.8319	32.689	32.2612	11.68	30.8128
11.72	32.4657	32.6953	32.8481	32.6444	32.3508	11.72	31.9282	33.9687	34.4151	33.432	33.1468	32.8291	11.72	31.9282	33.9687	34.4151	33.4193	32.5997	32.3252		11.72	27.9903	32.9563	32.2037	31.5941	31.7291	11.72	30.052	32.7781	33.1531	32.4338	32.1076	11.72	30.052	32.7781	33.1341	32.8481	32.5551	32.2549	11.72	30.052	32.7781	33.1341	32.6762	31.8062	32.7144	32.2421	11.72	30.8322
11.76	32.4913	32.7081	32.8163	32.6061	32.274	11.76	31.9025	34.1009	34.4277	33.451	33.1468	32.81	11.76	31.9025	34.1009	34.4277	33.432	32.6252	32.3124		11.76	27.9437	32.9626	32.1397	31.5876	31.742	11.76	30.065	32.8227	33.1214	32.421	32.2229	11.76	30.065	32.8227	33.1214	32.8418	32.5742	32.2293	11.76	30.065	32.8227	33.1214	32.7081	31.8126	32.7208	32.2293	11.76	30.8451
11.8	32.587	32.7527	32.81	32.5997	32.338	11.8	31.8447	34.0506	34.4214	33.5395	33.1531	32.8736	11.8	31.8447	34.0506	34.4214	33.4383	32.638	32.3508		11.8	27.9969	32.9626	32.1717	31.6584	31.6713	11.8	30.1107	32.8418	33.077	32.4146	32.1973	11.8	30.1107	32.8418	33.1214	32.8545	32.5615	32.2421	11.8	30.1107	32.8418	33.1214	32.7017	31.8319	32.7336	32.2485	11.8	30.8516
11.84	32.5423	32.6953	32.7972	32.638	32.3827	11.84	31.9731	34.038	34.4151	33.5079	33.1468	32.8736	11.84	31.9731	34.038	34.4151	33.4953	32.7081	32.3252		11.84	27.9903	32.9817	32.1909	31.5426	31.697	11.84	29.9736	32.8545	33.1214	32.3955	32.1973	11.84	29.9736	32.8545	33.1277	32.8481	32.5551	32.2549	11.84	29.9736	32.8545	33.1277	32.7017	31.819	32.8418	32.2549	11.84	30.9746
11.88	32.6444	32.8927	32.8609	32.6061	32.421	11.88	31.9731	33.9183	34.4402	33.3813	33.2102	32.8799	11.88	31.9731	33.9183	34.4402	33.5079	32.6762	32.3124		11.88	28.0102	33.0261	32.1653	31.5748	31.7291	11.88	30.0454	32.8545	33.2166	32.3955	32.1204	11.88	30.0454	32.8545	33.1849	32.8291	32.6571	32.3316	11.88	30.0454	32.8545	33.1849	32.7336	31.9153	32.8227	32.2549	11.88	30.897
11.92	32.5742	32.8736	32.8799	32.5742	32.453	11.92	31.9602	34.038	34.5092	33.3813	33.1658	32.8736	11.92	31.9602	34.038	34.5092	33.4953	32.6953	32.2676		11.92	28.0235	33.0706	32.2293	31.6069	31.6905	11.92	30.0128	32.8736	33.2926	32.4402	32.1269	11.92	30.0128	32.8736	33.2356	32.8354	32.6762	32.274	11.92	30.0128	32.8736	33.2356	32.7718	31.9474	32.8227	32.2868	11.92	30.9293
11.96	32.5742	32.8545	32.8736	32.587	32.4019	11.96	31.941	34.038	34.5029	33.3497	33.1531	32.9054	11.96	31.941	34.038	34.5029	33.5585	32.5997	32.2996		11.96	28.0036	32.988	32.3188	31.6327	31.7612	11.96	30.1172	32.8418	33.1277	32.5104	32.1333	11.96	30.1172	32.8418	33.2546	32.8545	32.6571	32.2804	11.96	30.1172	32.8418	33.2546	32.7845	31.9538	32.7463	32.3124	11.96	30.9358
12	32.5806	32.8736	32.8291	32.6444	32.4274	12	31.8768	34.0884	34.459	33.4003	33.1912	32.9054	12	31.8768	34.0884	34.459	33.5332	32.6635	32.3508		12	27.9836	33.0579	32.274	31.6777	31.7805	12	30.065	32.8163	33.1595	32.504	32.1333	12	30.065	32.8163	33.1595	32.8481	32.6444	32.306	12	30.065	32.8163	33.1595	32.7336	32.0308	32.7909	32.4849	12	30.897
12.04	32.5551	32.8736	32.8227	32.7144	32.4338	12.04	31.8832	34.0695	34.4528	33.4256	33.2229	32.9054	12.04	31.8832	34.0695	34.4528	33.6091	32.7081	32.3316		12.04	27.957	33.0134	32.2868	31.6841	31.8512	12.04	30.0781	32.899	33.3116	32.4913	32.0948	12.04	30.0781	32.899	33.2483	32.9563	32.5678	32.2868	12.04	30.0781	32.899	33.2483	32.759	31.9731	32.8736	32.504	12.04	30.8387
12.08	32.5997	32.9181	32.9117	32.689	32.3891	12.08	31.9217	34.1009	34.4528	33.4636	33.2166	32.988	12.08	31.9217	34.1009	34.4528	33.5901	32.7272	32.4019		12.08	27.9836	33.0706	32.306	31.652	31.8383	12.08	30.1042	32.8036	33.3116	32.5104	32.1845	12.08	30.1042	32.8036	33.2356	32.8672	32.587	32.3124	12.08	30.1042	32.8036	33.2356	32.8418	31.9795	32.8291	32.4977	12.08	30.8128
12.12	32.6252	32.9181	32.8799	32.6762	32.4913	12.12	31.9346	34.1638	34.6095	33.5775	33.1658	32.988	12.12	31.9346	34.1638	34.6095	33.628	32.7208	32.453		12.12	28.0036	33.0516	32.2804	31.7098	31.7677	12.12	30.1302	32.8799	33.3687	32.5678	32.1781	12.12	30.1302	32.8799	33.28	32.9753	32.5997	32.3188	12.12	30.1302	32.8799	33.28	32.9626	31.9602	32.8545	32.4402	12.12	31.0393
12.16	32.5104	32.8927	32.899	32.6826	32.4402	12.16	32.0051	34.1576	34.6157	33.6343	33.1849	33.0134	12.16	32.0051	34.1576	34.6157	33.5775	32.7845	32.4083		12.16	28.0169	33.0897	32.3124	31.7034	31.7805	12.16	30.1498	32.8163	33.3433	32.5806	32.2101	12.16	30.1498	32.8163	33.3243	32.9753	32.6125	32.4019	12.16	30.1498	32.8163	33.3243	32.9245	31.9282	32.988	32.4913	12.16	30.994
12.2	32.6635	32.9054	32.9245	32.7718	32.4849	12.2	32.0564	34.1764	34.6846	33.628	33.337	32.988	12.2	32.0564	34.1764	34.6846	33.5522	32.7463	32.6189		12.2	28.0435	33.1468	32.3444	31.7741	31.819	12.2	30.1628	32.9117	33.356	32.5296	32.2165	12.2	30.1628	32.9117	33.3687	32.9753	32.5997	32.3635	12.2	30.1628	32.9117	33.3687	32.81	31.9089	32.9435	32.421	12.2	30.9876
12.24	32.7017	32.9308	32.9054	32.81	32.4849	12.24	32.0564	34.1576	34.6471	33.5079	33.375	32.988	12.24	32.0564	34.1576	34.6471	33.6027	32.7654	32.6252		12.24	28.0634	33.1785	32.3508	31.7098	31.8062	12.24	30.2085	32.9245	33.394	32.4913	32.338	12.24	30.2085	32.9245	33.3813	32.969	32.5806	32.3763	12.24	30.2085	32.9245	33.3813	32.7845	31.9346	32.9054	32.4274	12.24	30.9617
12.28	32.5997	32.9308	32.9245	32.8227	32.4721	12.28	32.0628	34.145	34.6533	33.6343	33.3116	32.9753	12.28	32.0628	34.145	34.6533	33.5838	32.7972	32.6125		12.28	28.0634	33.2039	32.4338	31.6841	31.8319	12.28	30.1889	32.9817	33.4446	32.638	32.3827	12.28	30.1889	32.9817	33.4193	32.9817	32.5806	32.3188	12.28	30.1889	32.9817	33.4193	32.8291	31.9089	32.9245	32.4466	12.28	30.9488
12.32	32.587	32.988	32.9435	32.7845	32.4594	12.32	32.0564	34.189	34.6283	33.5079	33.3053	32.9181	12.32	32.0564	34.189	34.6283	33.6154	32.8036	32.5806		12.32	28.0501	33.2039	32.4594	31.8383	31.8319	12.32	30.1889	32.9308	33.4573	32.6507	32.3763	12.32	30.1889	32.9308	33.413	32.9499	32.6444	32.4977	12.32	30.1889	32.9308	33.413	32.7909	31.9474	32.9626	32.4977	12.32	30.9034
12.36	32.5997	32.9499	32.9308	32.7654	32.504	12.36	31.9859	34.1701	34.6157	33.5206	33.3307	33.0007	12.36	31.9859	34.1701	34.6157	33.6217	32.8799	32.5933		12.36	28.07	33.1975	32.5104	31.8062	31.8126	12.36	30.2019	32.9054	33.5395	32.689	32.3188	12.36	30.2019	32.9054	33.3813	33.0198	32.6698	32.3316	12.36	30.2019	32.9054	33.3813	32.8291	32.0308	32.9435	32.5359	12.36	30.8451
12.44	32.6826	32.9181	32.8927	32.7463	32.5296	12.44	32.0564	34.145	34.6032	33.5648	33.337	32.9626	12.44	32.0564	34.145	34.6032	33.6533	32.8736	32.6571		12.44	28.0634	33.096	32.4849	31.8126	31.8383	12.44	30.2019	33.0706	33.4953	32.7654	32.3124	12.44	30.2019	33.0706	33.4003	33.0071	32.759	32.3571	12.44	30.2019	33.0706	33.4003	32.9372	32.0628	32.9563	32.5678	12.44	30.9293
12.48	32.7208	32.9626	32.9245	32.7654	32.5359	12.48	31.9923	34.233	34.622	33.5775	33.3116	32.9817	12.48	31.9923	34.233	34.622	33.6786	32.9372	32.5806		12.48	28.0567	33.1722	32.4721	31.7998	31.9474	12.48	30.215	33.0325	33.4573	32.7336	32.3124	12.48	30.215	33.0325	33.4256	33.0389	32.7399	32.3635	12.48	30.215	33.0325	33.4256	33.0198	32.0564	32.9117	32.5806	12.48	30.897
12.52	32.7144	32.9308	33.0198	32.81	32.504	12.52	32.0948	34.2393	34.6032	33.6027	33.299	33.0007	12.52	32.0948	34.2393	34.6032	33.7165	32.9245	32.5423		12.52	28.0102	33.1912	32.4657	31.7805	31.8897	12.52	30.2801	33.0007	33.4383	32.689	32.4083	12.52	30.2801	33.0007	33.451	33.0389	32.7718	32.3699	12.52	30.2801	33.0007	33.451	33.0007	32.082	32.9117	32.638	12.52	30.8581
12.56	32.7144	32.9563	32.9817	32.7909	32.5232	12.56	32.0436	34.2267	34.6157	33.6533	33.2609	33.0516	12.56	32.0436	34.2267	34.6157	33.7038	32.8927	32.5678		12.56	28.0235	33.2166	32.4146	31.8576	31.8897	12.56	30.2671	33.0007	33.4953	32.7144	32.3827	12.56	30.2671	33.0007	33.451	33.0007	32.81	32.4083	12.56	30.2671	33.0007	33.451	32.9817	32.1845	32.9308	32.5742	12.56	30.9617
12.6	32.7272	33.0007	33.0007	32.7909	32.6635	12.6	32.0628	34.2958	34.6533	33.647	33.3243	33.0897	12.6	32.0628	34.2958	34.6533	33.7038	32.8863	32.5933		12.6	28.0169	33.2419	32.4019	31.8576	31.8961	12.6	30.241	32.9308	33.4889	32.689	32.3827	12.6	30.241	32.9308	33.4763	33.0452	32.759	32.3635	12.6	30.241	32.9308	33.4763	32.8672	32.1269	32.9626	32.5168	12.6	30.8905
12.64	32.7654	33.0325	33.0198	32.81	32.6635	12.64	32.0179	34.3272	34.7222	33.748	33.3497	33.0643	12.64	32.0179	34.3272	34.7222	33.7165	32.8863	32.6125		12.64	28.0368	33.299	32.4785	31.9474	32.0051	12.64	30.228	32.988	33.5269	32.7208	32.3508	12.64	30.228	32.988	33.4953	33.1024	32.7845	32.3571	12.64	30.228	32.988	33.4953	32.9563	32.1333	32.9944	32.5487	12.64	30.9034
12.68	32.7208	33.0261	33.077	32.8163	32.6571	12.68	31.9923	34.4088	34.7222	33.7291	33.3687	33.077	12.68	31.9923	34.4088	34.7222	33.6912	32.8736	32.5806		12.68	27.9637	33.2292	32.4977	31.9538	31.9987	12.68	30.1954	32.9944	33.5395	32.7654	32.3508	12.68	30.1954	32.9944	33.4953	33.1151	32.7654	32.3699	12.68	30.1954	32.9944	33.4953	32.9563	32.1333	32.9817	32.5615	12.68	30.9229
12.72	32.7017	33.0516	33.1595	33.0071	32.638	12.72	32.1204	34.3461	34.766	33.9057	33.432	33.1468	12.72	32.1204	34.3461	34.766	33.8553	32.899	32.6252		12.72	28.0368	33.1975	32.4721	31.9731	31.9795	12.72	30.2215	32.9435	33.4446	32.7081	32.3763	12.72	30.2215	32.9435	33.5901	33.1151	32.8354	32.4019	12.72	30.2215	32.9435	33.5901	33.0325	32.1461	32.9753	32.6061	12.72	30.8711
12.76	32.7527	33.0706	33.1912	32.9817	32.6762	12.76	32.1076	34.3712	34.7097	33.8237	33.3877	33.1214	12.76	32.1076	34.3712	34.7097	33.8237	32.8418	32.6125		12.76	28.0567	33.2039	32.5487	32.0372	32.0692	12.76	30.2801	33.0325	33.4953	32.7336	32.4083	12.76	30.2801	33.0325	33.6786	33.1468	32.8863	32.4594	12.76	30.2801	33.0325	33.6786	33.0706	32.1589	33.0261	32.587	12.76	30.9034
12.8	32.7081	33.077	33.2419	33.0198	32.6507	12.8	32.1525	34.39	34.7409	33.7922	33.4953	33.1214	12.8	32.1525	34.39	34.7409	33.7606	32.9245	32.7718		12.8	28.0435	33.299	32.5551	31.9666	32.0756	12.8	30.2475	33.1975	33.5775	32.8036	32.4019	12.8	30.2475	33.1975	33.6975	33.1341	32.8672	32.5104	12.8	30.2475	33.1975	33.6975	33.1468	32.1525	33.0579	32.5487	12.8	30.9034
12.84	32.9117	33.1087	33.2229	32.9817	32.6507	12.84	32.1461	34.3775	34.7347	33.7985	33.4953	33.2102	12.84	32.1461	34.3775	34.7347	33.7796	32.9117	32.7781		12.84	28.163	33.3053	32.5551	31.9538	32.0564	12.84	30.2475	33.096	33.5079	32.8163	32.3955	12.84	30.2475	33.096	33.6849	33.1785	32.8863	32.4977	12.84	30.2475	33.096	33.6849	33.1468	32.1845	32.988	32.6061	12.84	30.9164
12.88	32.8609	33.0897	33.1975	33.0706	32.6316	12.88	32.1525	34.3837	34.7597	33.8364	33.4446	33.2229	12.88	32.1525	34.3837	34.7597	33.767	32.9817	32.689		12.88	28.1298	33.3307	32.6125	31.9731	31.9987	12.88	30.2475	33.1087	33.5459	32.8163	32.4146	12.88	30.2475	33.1087	33.5838	33.2863	32.9372	32.5359	12.88	30.2475	33.1087	33.5838	33.096	32.2229	33.1024	32.5933	12.88	30.9876
12.92	32.8036	33.1151	33.1722	33.0325	32.7272	12.92	32.114	34.4026	34.7597	33.9246	33.4383	33.2546	12.92	32.114	34.4026	34.7597	33.767	33.0706	32.6507		12.92	28.1829	33.318	32.6125	31.941	32.0115	12.92	30.2475	33.0452	33.5901	32.8291	32.3955	12.92	30.2475	33.0452	33.5901	33.2546	32.9435	32.5551	12.92	30.2475	33.0452	33.5901	33.077	32.2485	33.1214	32.6061	12.92	31.0005
12.96	32.8354	33.1468	33.1531	33.0579	32.6507	12.96	32.114	34.4151	34.7597	33.8994	33.4953	33.2926	12.96	32.114	34.4151	34.7597	33.8616	32.9817	32.6507		12.96	28.1497	33.337	32.5997	31.9795	32.0948	12.96	30.2606	33.0007	33.6154	32.81	32.3955	12.96	30.2606	33.0007	33.6027	33.2039	32.9499	32.5296	12.96	30.2606	33.0007	33.6027	33.1912	32.2612	33.1468	32.7463	12.96	31.0393
13	32.8481	33.1849	33.2039	33.077	32.7654	13	32.1589	34.3586	34.7597	33.8931	33.432	33.28	13	32.1589	34.3586	34.7597	33.8742	32.9817	32.5933		13	28.1497	33.1785	32.6061	32.0756	32.0243	13	30.3517	33.0198	33.6217	32.9435	32.504	13	30.3517	33.0198	33.5775	33.1785	32.9372	32.5678	13	30.3517	33.0198	33.5775	33.1531	32.2101	33.0261	32.6953	13	31.0717
13.04	32.8354	33.2292	33.299	33.0706	32.7272	13.04	32.2101	34.3775	34.7284	33.8048	33.6407	33.299	13.04	32.2101	34.3775	34.7284	33.8427	33.0325	32.7144		13.04	28.07	33.2039	32.6571	32.0436	32.0564	13.04	30.2996	33.0198	33.6343	32.988	32.5742	13.04	30.2996	33.0198	33.5648	33.1785	32.9817	32.6507	13.04	30.2996	33.0198	33.5648	33.077	32.2676	33.077	32.7399	13.04	31.0846
13.08	32.8609	33.2673	33.2736	33.0134	32.7909	13.08	32.2229	34.459	34.7785	33.8616	33.5648	33.337	13.08	32.2229	34.459	34.7785	33.8931	33.077	32.6125		13.08	28.0966	33.4193	32.7144	32.1397	32.0948	13.08	30.3452	33.0325	33.7291	33.0389	32.5742	13.08	30.3452	33.0325	33.7038	33.2356	33.0007	32.6507	13.08	30.3452	33.0325	33.7038	33.1531	32.3508	33.2229	32.7845	13.08	31.104
13.12	32.7909	33.3053	33.3687	33.1214	32.8545	13.12	32.2101	34.4339	34.841	33.8742	33.6343	33.3497	13.12	32.2101	34.4339	34.841	33.8427	33.1151	32.6635		13.12	28.0966	33.4067	32.6635	32.1525	32.1012	13.12	30.3062	33.1341	33.7543	33.0134	32.5997	13.12	30.3062	33.1341	33.7543	33.375	33.0643	32.7081	13.12	30.3062	33.1341	33.7543	33.077	32.3252	33.1722	32.7654	13.12	31.1169
13.16	32.8163	33.3116	33.3813	33.096	32.8354	13.16	32.1973	34.5907	34.9785	33.9246	33.6786	33.318	13.16	32.1973	34.5907	34.9785	33.8679	33.1658	32.7144		13.16	28.2029	33.432	32.7081	32.1653	32.1204	13.16	30.3387	33.1341	33.7733	32.9944	32.6571	13.16	30.3387	33.1341	33.767	33.4067	33.1024	32.7272	13.16	30.3387	33.1341	33.767	33.0833	32.3508	33.2166	32.7017	13.16	31.1363
13.2	32.8609	33.2229	33.375	33.1531	32.8545	13.2	32.114	34.5217	34.9722	33.9561	33.7291	33.3623	13.2	32.114	34.5217	34.9722	33.912	33.1658	32.7845		13.2	28.1962	33.413	32.7272	32.2421	32.2037	13.2	30.4623	33.28	33.7796	32.9944	32.6316	13.2	30.4623	33.28	33.767	33.3687	33.1151	32.7399	13.2	30.4623	33.28	33.767	33.1912	32.4146	33.1975	32.7654	13.2	31.1363
13.28	32.9435	33.3243	33.394	33.1595	32.7972	13.28	32.1781	34.5844	34.966	33.9498	33.7543	33.4573	13.28	32.1781	34.5844	34.966	33.9183	33.1785	32.81		13.28	28.2161	33.4573	32.7399	32.2229	32.1717	13.28	30.4623	33.28	33.767	33.0389	32.6061	13.28	30.4623	33.28	33.748	33.2926	33.1151	32.7654	13.28	30.4623	33.28	33.748	33.2609	32.3955	33.1595	32.8227	13.28	31.1104
13.32	32.9054	33.299	33.3116	33.1595	32.81	13.32	32.2229	34.4904	34.9535	33.8931	33.6912	33.47	13.32	32.2229	34.4904	34.9535	33.9624	33.1658	32.8036		13.32	28.2294	33.451	32.7336	32.1653	32.1717	13.32	30.5013	33.299	33.767	33.0071	32.6762	13.32	30.5013	33.299	33.7985	33.3116	33.1024	32.7718	13.32	30.5013	33.299	33.7985	33.1214	32.4594	33.2926	32.8227	13.32	31.1363
13.36	32.9054	33.3053	33.3497	33.1277	32.8163	13.36	32.1909	34.4779	34.9472	33.8994	33.7101	33.4826	13.36	32.1909	34.4779	34.9472	33.9624	33.1975	32.8227		13.36	28.163	33.432	32.7336	32.2676	32.1717	13.36	30.5532	33.2546	33.767	32.988	32.7017	13.36	30.5532	33.2546	33.7543	33.28	33.1087	32.8036	13.36	30.5532	33.2546	33.7543	33.2229	32.4721	33.2863	32.759	13.36	31.1234
13.4	32.9626	33.3433	33.4003	33.1468	32.8545	13.4	32.1589	34.4465	34.9472	33.849	33.7228	33.451	13.4	32.1589	34.4465	34.9472	33.9939	33.2039	32.9372		13.4	28.1232	33.4889	32.7144	32.1973	32.2421	13.4	30.4493	33.1785	33.8111	33.0134	32.6953	13.4	30.4493	33.1785	33.7417	33.3497	33.1341	32.8545	13.4	30.4493	33.1785	33.7417	33.1531	32.4721	33.3116	32.8227	13.4	31.1815
13.44	33.0452	33.3307	33.3877	33.1277	32.8545	13.44	32.3188	34.3649	34.9472	33.8931	33.7606	33.4193	13.44	32.3188	34.3649	34.9472	33.9561	33.2419	33.0134		13.44	28.1033	33.4383	32.8927	32.2293	32.2229	13.44	30.4103	33.1595	33.7796	33.096	32.7272	13.44	30.4103	33.1595	33.7165	33.3623	33.1468	32.8291	13.44	30.4103	33.1595	33.7165	33.1595	32.4594	33.3307	32.8163	13.44	31.1169
13.48	33.0643	33.4383	33.3433	33.0833	32.8799	13.48	32.2932	34.4967	35.0659	33.912	33.7733	33.4383	13.48	32.2932	34.4967	35.0659	33.9876	33.2863	32.9944		13.48	28.2029	33.4763	32.81	32.2421	32.1269	13.48	30.4298	33.1975	33.7291	33.1024	32.6635	13.48	30.4298	33.1975	33.8111	33.394	33.1595	32.8036	13.48	30.4298	33.1975	33.8111	33.2863	32.4657	33.3687	32.899	13.48	31.1427
13.52	33.0579	33.432	33.3813	33.1975	32.9054	13.52	32.2932	34.4967	34.9847	33.9309	33.7606	33.4636	13.52	32.2932	34.4967	34.9847	34.0254	33.2673	32.9499		13.52	28.2029	33.4446	32.7654	32.1909	32.2485	13.52	30.4753	33.2039	33.7228	33.1087	32.7017	13.52	30.4753	33.2039	33.9183	33.337	33.1658	32.8863	13.52	30.4753	33.2039	33.9183	33.3243	32.4657	33.3687	32.9435	13.52	31.1815
13.56	33.0134	33.4193	33.4256	33.1595	32.988	13.56	32.274	34.5719	34.991	34.0065	33.7859	33.4636	13.56	32.274	34.5719	34.991	34.0821	33.1595	32.9626		13.56	28.2493	33.47	32.7208	32.2804	32.2421	13.56	30.4558	33.2736	33.767	33.1595	32.7463	13.56	30.4558	33.2736	33.9057	33.3623	33.1785	32.9245	13.56	30.4558	33.2736	33.9057	33.299	32.4721	33.413	32.8481	13.56	31.1686
13.6	33.0643	33.451	33.5459	33.2609	33.0071	13.6	32.3635	34.622	35.0284	34.0821	33.7606	33.451	13.6	32.3635	34.622	35.0284	34.0695	33.2166	33.0643		13.6	28.2294	33.4573	32.8418	32.2037	32.2357	13.6	30.4753	33.2483	33.8427	33.1658	32.81	13.6	30.4753	33.2483	33.8931	33.3687	33.1912	32.9181	13.6	30.4753	33.2483	33.8931	33.3307	32.4594	33.413	32.9117	13.6	31.1686
13.64	33.0071	33.4636	33.5142	33.28	32.9626	13.64	32.3508	34.6095	35.0159	34.0821	33.7796	33.4953	13.64	32.3508	34.6095	35.0159	34.0884	33.3116	33.0706		13.64	28.2029	33.47	32.8354	32.2485	32.2165	13.64	30.5013	33.1912	33.8805	33.1087	32.7272	13.64	30.5013	33.1912	33.912	33.4256	33.2356	32.9626	13.64	30.5013	33.1912	33.912	33.318	32.5742	33.3116	32.988	13.64	31.2461
13.68	33.1214	33.4636	33.5269	33.3243	33.0261	13.68	32.2996	34.6846	34.9972	34.0695	33.8111	33.47	13.68	32.2996	34.6846	34.9972	34.1701	33.2863	33.0579		13.68	28.236	33.5142	32.81	32.2932	32.2357	13.68	30.5273	33.2039	33.8805	33.1341	32.7718	13.68	30.5273	33.2039	33.8931	33.3813	33.2292	32.9499	13.68	30.5273	33.2039	33.8931	33.2926	32.5742	33.337	32.9753	13.68	31.2461
13.72	33.0833	33.4889	33.4826	33.2483	33.0389	13.72	32.2549	34.6032	34.9847	34.0443	33.83	33.5395	13.72	32.2549	34.6032	34.9847	34.1701	33.4067	33.1341		13.72	28.2493	33.4636	32.8481	32.3827	32.2868	13.72	30.4818	33.2292	33.8805	33.1722	32.8227	13.72	30.4818	33.2292	33.9309	33.356	33.2546	32.9054	13.72	30.4818	33.2292	33.9309	33.2546	32.5678	33.4003	33.0071	13.72	31.2009
13.76	33.077	33.47	33.4889	33.2419	33.0643	13.76	32.4083	34.5782	34.9972	34.0443	33.767	33.4953	13.76	32.4083	34.5782	34.9972	34.1513	33.4383	33.1722		13.76	28.2692	33.5142	32.8354	32.3763	32.306	13.76	30.5273	33.2483	33.8742	33.1785	32.7781	13.76	30.5273	33.2483	33.9246	33.394	33.3053	32.9435	13.76	30.5273	33.2483	33.9246	33.2483	32.6252	33.4636	32.9817	13.76	31.2202
13.8	33.077	33.47	33.4573	33.2483	33.0261	13.8	32.3891	34.5907	34.9972	34.0443	33.7417	33.5016	13.8	32.3891	34.5907	34.9972	34.1953	33.4826	33.1277		13.8	28.2891	33.5585	32.8863	32.3891	32.3124	13.8	30.3192	33.3813	33.9435	33.2039	32.8291	13.8	30.3192	33.3813	33.9183	33.4256	33.3116	33.077	13.8	30.3192	33.3813	33.9183	33.2546	32.6316	33.4383	33.0198	13.8	31.2009
13.84	33.0643	33.5142	33.5711	33.318	32.9563	13.84	32.3635	34.5029	35.0471	34.1198	33.83	33.5395	13.84	32.3635	34.5029	35.0471	34.1701	33.4889	33.1024		13.84	28.2891	33.5964	32.8927	32.3763	32.3316	13.84	30.3582	33.3497	33.9246	33.1658	32.8036	13.84	30.3582	33.3497	33.8994	33.5269	33.2483	33.0452	13.84	30.3582	33.3497	33.8994	33.3243	32.6189	33.451	33.077	13.84	31.2719
13.88	33.1214	33.47	33.5585	33.3243	32.9817	13.88	32.3188	34.5656	35.0659	34.189	33.8994	33.5585	13.88	32.3188	34.5656	35.0659	34.1513	33.5079	33.1087		13.88	28.2891	33.5459	32.8927	32.3955	32.2868	13.88	30.3842	33.337	33.9435	33.1658	32.7781	13.88	30.3842	33.337	33.8868	33.5206	33.2546	33.0198	13.88	30.3842	33.337	33.8868	33.3433	32.6762	33.4573	33.1087	13.88	31.2267
13.92	33.1151	33.5142	33.6027	33.318	33.0579	13.92	32.3444	34.6658	35.1033	34.2456	33.7985	33.5775	13.92	32.3444	34.6658	35.1033	34.2016	33.5648	33.0897		13.92	28.3819	33.5585	32.9054	32.4019	32.2996	13.92	30.4948	33.3813	33.9624	33.2926	32.8354	13.92	30.4948	33.3813	33.9561	33.5016	33.2419	33.0706	13.92	30.4948	33.3813	33.9561	33.3116	32.689	33.4193	33.1151	13.92	31.2138
13.96	32.988	33.6091	33.647	33.356	33.077	13.96	32.3508	34.6784	35.1158	34.1953	33.8868	33.6027	13.96	32.3508	34.6784	35.1158	34.233	33.5269	33.1404		13.96	28.4217	33.5522	33.0007	32.3955	32.306	13.96	30.4623	33.4003	33.9372	33.2609	32.7845	13.96	30.4623	33.4003	33.9372	33.5711	33.3116	33.1468	13.96	30.4623	33.4003	33.9372	33.3116	32.7017	33.5459	33.0706	13.96	31.2267
14	32.9499	33.6596	33.6343	33.3877	33.1024	14	32.4083	34.6471	35.1532	34.2456	33.9057	33.6217	14	32.4083	34.6471	35.1532	34.2204	33.4446	33.1277		14	28.4084	33.5585	33.0007	32.4338	32.338	14	30.4493	33.3813	33.9939	33.2483	32.7654	14	30.4493	33.3813	33.9372	33.5775	33.2926	33.1087	14	30.4493	33.3813	33.9372	33.2673	32.7208	33.5522	33.1404	14	31.2783
14.04	33.0007	33.6533	33.5964	33.3497	33.0897	14.04	32.4466	34.6095	35.1719	34.39	33.9561	33.5459	14.04	32.4466	34.6095	35.1719	34.2267	33.4446	33.1404		14.04	28.3819	33.6343	32.988	32.421	32.3188	14.04	30.4753	33.3687	34.0254	33.2292	32.759	14.04	30.4753	33.3687	33.9246	33.6091	33.28	33.0325	14.04	30.4753	33.3687	33.9246	33.2863	32.6953	33.4953	33.1849	14.04	31.2267
14.12	33.0071	33.6217	33.628	33.4003	33.0389	14.12	32.4913	34.6157	35.1158	34.3837	33.9561	33.6027	14.12	32.4913	34.6157	35.1158	34.2644	33.4193	33.1151		14.12	28.4018	33.6217	33.0516	32.3955	32.3508	14.12	30.4298	33.337	34.0317	33.1975	32.7144	14.12	30.4298	33.337	33.9561	33.5459	33.2419	33.0452	14.12	30.4298	33.337	33.9561	33.3687	32.6826	33.5269	33.1658	14.12	31.2396
14.16	33.0452	33.6343	33.6596	33.3813	33.0261	14.16	32.4849	34.6345	35.0783	34.3147	33.9687	33.6849	14.16	32.4849	34.6345	35.0783	34.2707	33.47	33.1531		14.16	28.3819	33.6217	33.0452	32.4657	32.3763	14.16	30.5403	33.375	34.0632	33.2673	32.7527	14.16	30.5403	33.375	33.9498	33.5079	33.2609	33.0706	14.16	30.5403	33.375	33.9498	33.3497	32.6698	33.5079	33.1531	14.16	31.2202
14.2	33.0261	33.5901	33.6722	33.3813	33.1531	14.2	32.421	34.6784	35.1594	34.3335	33.9813	33.6912	14.2	32.421	34.6784	35.1594	34.2896	33.5079	33.2229		14.2	28.3024	33.6154	33.077	32.4083	32.3444	14.2	30.5727	33.4067	34.0569	33.2166	32.7208	14.2	30.5727	33.4067	33.9876	33.5332	33.2609	33.1214	14.2	30.5727	33.4067	33.9876	33.28	32.6762	33.5142	33.077	14.2	31.3235
14.24	33.0261	33.628	33.6659	33.4573	33.1722	14.24	32.4466	34.7097	35.2529	34.3712	34.038	33.7165	14.24	32.4466	34.7097	35.2529	34.3084	33.5395	33.2166		14.24	28.2891	33.6027	32.969	32.3699	32.3508	14.24	30.5792	33.4193	34.0569	33.2609	32.7463	14.24	30.5792	33.4193	33.8868	33.5079	33.2609	33.0452	14.24	30.5792	33.4193	33.8868	33.4573	32.6635	33.5016	33.0897	14.24	31.317
14.28	32.9944	33.6154	33.6596	33.4953	33.0198	14.28	32.4402	34.7034	35.2342	34.3335	34.1198	33.7733	14.28	32.4402	34.7034	35.2342	34.3649	33.4763	33.1785		14.28	28.2891	33.6786	32.9817	32.3699	32.3188	14.28	30.5922	33.413	34.0191	33.337	32.759	14.28	30.5922	33.413	33.9624	33.5522	33.28	33.0325	14.28	30.5922	33.413	33.9624	33.4256	32.6189	33.5395	33.1912	14.28	31.317
14.32	33.0897	33.6027	33.6975	33.4826	33.0833	14.32	32.5104	34.7034	35.203	34.3335	33.9813	33.7228	14.32	32.5104	34.7034	35.203	34.3524	33.5079	33.1912		14.32	28.2758	33.6091	33.0897	32.4146	32.4849	14.32	30.6247	33.4003	34.0569	33.318	32.8036	14.32	30.6247	33.4003	34.0632	33.5711	33.2926	33.0325	14.32	30.6247	33.4003	34.0632	33.4636	32.6444	33.4953	33.1849	14.32	31.3041
14.36	33.1531	33.6596	33.7417	33.4573	33.1468	14.36	32.4657	34.7097	35.2466	34.3398	34.0506	33.7543	14.36	32.4657	34.7097	35.2466	34.39	33.5206	33.1912		14.36	28.2161	33.628	33.1277	32.4146	32.3955	14.36	30.5987	33.47	34.0443	33.3116	32.8163	14.36	30.5987	33.47	34.0254	33.5711	33.3243	33.0516	14.36	30.5987	33.47	34.0254	33.4573	32.6444	33.5206	33.1595	14.36	31.2977
14.4	33.2483	33.6786	33.748	33.4573	33.1214	14.4	32.5104	34.6721	35.228	34.2958	34.0317	33.7291	14.4	32.5104	34.6721	35.228	34.3649	33.5206	33.1341		14.4	28.3554	33.6722	33.0198	32.5296	32.4913	14.4	30.5922	33.5459	33.9876	33.299	32.8927	14.4	30.5922	33.5459	34.0191	33.6027	33.432	33.0643	14.4	30.5922	33.5459	34.0191	33.4763	32.7272	33.5711	33.096	14.4	31.3364
14.44	33.1912	33.7796	33.7606	33.451	33.1912	14.44	32.6826	34.7597	35.2529	34.3272	34.0884	33.7606	14.44	32.6826	34.7597	35.2529	34.39	33.6217	33.1912		14.44	28.4217	33.6659	33.0897	32.4977	32.4083	14.44	30.6377	33.4383	34.0254	33.2926	32.9817	14.44	30.6377	33.4383	34.0506	33.628	33.4067	33.1277	14.44	30.6377	33.4383	34.0506	33.5332	32.7399	33.6343	33.1595	14.44	31.3686
14.48	33.2102	33.7922	33.7733	33.5332	33.1912	14.48	32.6635	34.916	35.3276	34.3963	34.0506	33.7796	14.48	32.6635	34.916	35.3276	34.4339	33.6091	33.2483		14.48	28.3819	33.7101	33.1087	32.5423	32.4594	14.48	30.6571	33.5585	34.145	33.375	32.9753	14.48	30.6571	33.5585	34.1324	33.6407	33.4953	33.1214	14.48	30.6571	33.5585	34.1324	33.5016	32.8163	33.7291	33.2419	14.48	31.4395
14.52	33.1912	33.767	33.83	33.6343	33.299	14.52	32.689	34.9348	35.3338	34.3649	34.0758	33.8048	14.52	32.689	34.9348	35.3338	34.3837	33.6786	33.299		14.52	28.4084	33.7101	33.1595	32.5104	32.4402	14.52	30.6052	33.5332	34.1261	33.4003	32.9817	14.52	30.6052	33.5332	34.1701	33.6596	33.4636	33.1024	14.52	30.6052	33.5332	34.1701	33.5079	32.8227	33.6975	33.1849	14.52	31.4524
14.56	33.1404	33.7228	33.8427	33.6217	33.299	14.56	32.5551	34.8598	35.3836	34.5907	34.1009	33.8805	14.56	32.5551	34.8598	35.3836	34.4339	33.6407	33.318		14.56	28.4614	33.7101	33.1722	32.504	32.5742	14.56	30.6377	33.6659	34.2141	33.432	32.9817	14.56	30.6377	33.6659	34.3147	33.6217	33.5395	33.1468	14.56	30.6377	33.6659	34.3147	33.5459	32.8163	33.6849	33.2229	14.56	31.5683
14.6	33.1595	33.8111	33.8111	33.6027	33.3877	14.6	32.638	34.8723	35.508	34.6032	34.1324	33.8931	14.6	32.638	34.8723	35.508	34.5719	33.6533	33.2609		14.6	28.3753	33.6849	33.2166	32.5806	32.6125	14.6	30.6896	33.5964	34.145	33.413	32.988	14.6	30.6896	33.5964	34.3775	33.7417	33.5269	33.1912	14.6	30.6896	33.5964	34.3775	33.5332	32.8863	33.8111	33.2609	14.6	31.5619
14.64	33.1849	33.8679	33.8048	33.6154	33.3813	14.64	32.6125	34.891	35.452	34.5029	34.1387	33.8868	14.64	32.6125	34.891	35.452	34.4967	33.6912	33.3307		14.64	28.3687	33.7354	33.2356	32.5742	32.6444	14.64	30.7285	33.6975	34.1953	33.413	33.0071	14.64	30.7285	33.6975	34.277	33.767	33.5079	33.1785	14.64	30.7285	33.6975	34.277	33.5522	32.8799	33.7228	33.3243	14.64	31.5233
14.68	33.3687	33.849	33.849	33.6343	33.3307	14.68	32.6316	34.9285	35.3898	34.5844	34.1513	33.9246	14.68	32.6316	34.9285	35.3898	34.4653	33.6027	33.394		14.68	28.4018	33.748	33.2736	32.5551	32.587	14.68	30.6961	33.8048	34.189	33.413	33.0071	14.68	30.6961	33.8048	34.2581	33.7733	33.4953	33.2483	14.68	30.6961	33.8048	34.2581	33.647	32.8863	33.8427	33.4003	14.68	31.4975
14.72	33.4067	33.849	33.8364	33.647	33.356	14.72	32.6698	34.941	35.3836	34.5782	34.1701	33.9309	14.72	32.6698	34.941	35.3836	34.4841	33.6407	33.318		14.72	28.415	33.8174	33.2863	32.5806	32.587	14.72	30.7155	33.748	34.1764	33.4446	33.0452	14.72	30.7155	33.748	34.1827	33.9246	33.5901	33.1912	14.72	30.7155	33.748	34.1827	33.647	32.9308	33.8364	33.318	14.72	31.5104
14.76	33.3243	33.8679	33.8868	33.6849	33.3623	14.76	32.7017	34.9348	35.452	34.5782	34.1953	33.9372	14.76	32.7017	34.9348	35.452	34.4904	33.6975	33.3243		14.76	28.4084	33.7985	33.318	32.6316	32.6125	14.76	30.6896	33.767	34.1764	33.4067	33.0516	14.76	30.6896	33.767	34.1764	33.8994	33.5206	33.2863	14.76	30.6896	33.767	34.1764	33.6722	32.9499	33.7922	33.3307	14.76	31.504
14.8	33.2673	33.8868	33.9498	33.7165	33.2736	14.8	32.6571	34.9285	35.4458	34.5092	34.1576	33.9057	14.8	32.6571	34.9285	35.4458	34.528	33.7417	33.4446		14.8	28.4018	33.7291	33.2926	32.6316	32.5933	14.8	30.6571	33.8048	34.1953	33.413	33.0706	14.8	30.6571	33.8048	34.2644	33.8742	33.5838	33.3307	14.8	30.6571	33.8048	34.2644	33.6659	32.9372	33.8364	33.356	14.8	31.5812
14.84	33.3053	33.8616	33.8994	33.6407	33.2673	14.84	32.6571	34.9972	35.452	34.5406	34.2016	33.9372	14.84	32.6571	34.9972	35.452	34.4779	33.748	33.394		14.84	28.3488	33.7038	33.3307	32.689	32.587	14.84	30.7285	33.83	34.3021	33.5016	33.0325	14.84	30.7285	33.83	34.2141	33.8174	33.647	33.2356	14.84	30.7285	33.83	34.2141	33.6596	32.9181	33.7038	33.413	14.84	31.5748
14.88	33.337	33.849	33.8931	33.6217	33.2863	14.88	32.6316	35.0159	35.4147	34.4779	34.2079	33.9435	14.88	32.6316	35.0159	35.4147	34.5155	33.6912	33.4953		14.88	28.4746	33.7796	33.3623	32.7463	32.5678	14.88	30.7544	33.7354	34.2896	33.5269	33.1214	14.88	30.7544	33.7354	34.2644	33.8679	33.6722	33.1975	14.88	30.7544	33.7354	34.2644	33.6659	32.9117	33.7038	33.4193	14.88	31.4524
14.96	33.356	33.8553	33.9939	33.7228	33.356	14.96	32.7909	35.0097	35.4831	34.5092	34.2141	33.9246	14.96	32.7909	35.0097	35.4831	34.5719	33.7354	33.4826		14.96	28.5342	33.7796	33.375	32.6953	32.587	14.96	30.7479	33.7354	34.3335	33.5522	33.1785	14.96	30.7479	33.7354	34.2519	33.9624	33.6659	33.2546	14.96	30.7479	33.7354	34.2519	33.6849	32.9626	33.8174	33.3813	14.96	31.5683
15	33.4193	33.912	33.9876	33.6659	33.4446	15	32.81	35.0097	35.4831	34.5217	34.2581	33.9561	15	32.81	35.0097	35.4831	34.4465	33.7733	33.4953		15	28.5011	33.8237	33.3497	32.7208	32.5806	15	30.7739	33.7922	34.3461	33.5332	33.1214	15	30.7739	33.7922	34.2896	33.9498	33.6659	33.28	15	30.7739	33.7922	34.2896	33.647	32.9563	33.7543	33.3307	15	31.5941
15.04	33.3877	33.9624	34.0191	33.7165	33.4256	15.04	32.7654	35.0222	35.5018	34.5092	34.2393	33.9876	15.04	32.7654	35.0222	35.5018	34.5155	33.8048	33.432		15.04	28.4283	33.7606	33.318	32.7463	32.6061	15.04	30.735	33.7543	34.3021	33.5142	33.1468	15.04	30.735	33.7543	34.2958	33.9939	33.6407	33.2356	15.04	30.735	33.7543	34.2958	33.628	32.8799	33.7922	33.3433	15.04	31.5683
15.08	33.432	33.9246	34.0254	33.748	33.3877	15.08	32.7718	35.0534	35.5515	34.5406	34.2581	34.0002	15.08	32.7718	35.0534	35.5515	34.528	33.7985	33.3877		15.08	28.4945	33.7228	33.3433	32.7781	32.6316	15.08	30.7609	33.748	34.277	33.5838	33.1277	15.08	30.7609	33.748	34.3084	33.975	33.6596	33.2546	15.08	30.7609	33.748	34.3084	33.7606	32.899	33.7859	33.356	15.08	31.549
15.12	33.394	33.975	33.9876	33.7417	33.4067	15.12	32.7654	35.0846	35.5639	34.6095	34.3335	34.1009	15.12	32.7654	35.0846	35.5639	34.4967	33.8048	33.4067		15.12	28.4548	33.7543	33.3307	32.8163	32.6189	15.12	30.7415	33.7165	34.3335	33.5775	33.1341	15.12	30.7415	33.7165	34.3461	33.9435	33.6975	33.2356	15.12	30.7415	33.7165	34.3461	33.7038	32.9054	33.8174	33.375	15.12	31.5426
15.16	33.413	33.9813	34.0695	33.7796	33.3687	15.16	32.7781	35.0471	35.6074	34.4716	34.321	34.1261	15.16	32.7781	35.0471	35.6074	34.5594	33.8111	33.4193		15.16	28.3554	33.7922	33.3623	32.81	32.6762	15.16	30.7155	33.7228	34.2896	33.6154	33.1531	15.16	30.7155	33.7228	34.2644	33.9183	33.7417	33.2419	15.16	30.7155	33.7228	34.2644	33.7606	33.0007	33.8553	33.4446	15.16	31.549
15.2	33.3307	33.9624	33.9939	33.767	33.432	15.2	32.7845	35.0534	35.6012	34.4528	34.2958	34.1135	15.2	32.7845	35.0534	35.6012	34.5594	33.8111	33.4256		15.2	28.5011	33.8679	33.3307	32.7336	32.6953	15.2	30.735	33.7733	34.3837	33.6596	33.0897	15.2	30.735	33.7733	34.3147	33.9183	33.7291	33.2292	15.2	30.735	33.7733	34.3147	33.7985	32.9435	33.8553	33.4067	15.2	31.5555
15.24	33.4003	33.9813	34.0443	33.6912	33.4446	15.24	32.7718	35.0846	35.6571	34.6408	34.3837	34.1009	15.24	32.7718	35.0846	35.6571	34.5719	33.8111	33.47		15.24	28.468	33.8805	33.3813	32.7463	32.5997	15.24	30.8257	33.7038	34.4779	33.6533	33.1531	15.24	30.8257	33.7038	34.4528	33.9624	33.7733	33.3623	15.24	30.8257	33.7038	34.4528	33.748	32.8927	33.8931	33.4193	15.24	31.6069
15.28	33.47	33.975	34.0569	33.7038	33.4383	15.28	32.7909	35.0846	35.5888	34.6345	34.3586	34.0821	15.28	32.7909	35.0846	35.5888	34.6032	33.8616	33.5711		15.28	28.4614	33.8679	33.4003	32.7718	32.6507	15.28	30.7609	33.7038	34.4528	33.628	33.2039	15.28	30.7609	33.7038	34.39	33.9309	33.7606	33.318	15.28	30.7609	33.7038	34.39	33.8111	33.0134	33.8994	33.4003	15.28	31.6391
15.32	33.4573	33.9939	34.1576	33.7796	33.4003	15.32	32.9054	35.1345	35.6322	34.6157	34.3775	34.0884	15.32	32.9054	35.1345	35.6322	34.5029	33.8553	33.6091		15.32	28.5607	33.9057	33.413	32.8036	32.6762	15.32	30.7609	33.6786	34.5029	33.6154	33.2292	15.32	30.7609	33.6786	34.4967	33.9435	33.7922	33.3053	15.32	30.7609	33.6786	34.4967	33.849	32.9817	34.0317	33.4383	15.32	31.6327
15.36	33.413	34.0946	34.145	33.8237	33.47	15.36	32.8354	35.1469	35.626	34.6971	34.4214	34.0884	15.36	32.8354	35.1469	35.626	34.5719	33.8553	33.5648		15.36	28.554	33.8994	33.451	32.8418	32.7527	15.36	30.7933	33.6912	34.4967	33.6849	33.2546	15.36	30.7933	33.6912	34.4779	33.9435	33.7733	33.3877	15.36	30.7933	33.6912	34.4779	33.7859	33.0134	34.0254	33.4446	15.36	31.6069
15.4	33.47	34.189	34.1638	33.8364	33.5395	15.4	32.8418	35.0596	35.626	34.6596	34.4528	34.1387	15.4	32.8418	35.0596	35.626	34.5782	33.849	33.5964		15.4	28.6069	33.9183	33.451	32.9435	32.7144	15.4	30.8257	33.7101	34.5531	33.6975	33.3687	15.4	30.8257	33.7101	34.5406	34.0191	33.83	33.3877	15.4	30.8257	33.7101	34.5406	33.7985	33.0516	34.0317	33.451	15.4	31.5683
15.44	33.5142	34.0569	34.1953	33.7543	33.4889	15.44	32.8545	35.0846	35.6198	34.6971	34.4528	34.1764	15.44	32.8545	35.0846	35.6198	34.5719	33.8742	33.6343		15.44	28.5739	33.9561	33.451	32.9372	32.7208	15.44	30.8257	33.7291	34.459	33.6849	33.3243	15.44	30.8257	33.7291	34.5217	33.9813	33.849	33.3877	15.44	30.8257	33.7291	34.5217	33.8174	33.0706	34.0002	33.5459	15.44	31.6005
15.48	33.5964	34.1135	34.1638	33.9309	33.4763	15.48	32.8609	35.0534	35.6446	34.7222	34.4653	34.1387	15.48	32.8609	35.0534	35.6446	34.6596	33.8679	33.6217		15.48	28.5011	33.849	33.4953	32.9944	32.7144	15.48	30.8322	33.8616	34.4653	33.6849	33.2609	15.48	30.8322	33.8616	34.5029	34.0191	33.8553	33.3116	15.48	30.8322	33.8616	34.5029	33.8994	33.0643	33.9435	33.5332	15.48	31.6262
15.52	33.6722	34.0758	34.1513	33.9435	33.5016	15.52	32.7845	35.1158	35.6508	34.6658	34.4716	34.1638	15.52	32.7845	35.1158	35.6508	34.7034	33.8364	33.628		15.52	28.4217	33.849	33.451	32.9563	32.7144	15.52	30.8581	33.9498	34.5343	33.6786	33.28	15.52	30.8581	33.9498	34.5217	34.038	33.8427	33.3813	15.52	30.8581	33.9498	34.5217	33.83	33.096	34.0821	33.5395	15.52	31.652
15.56	33.5459	34.0821	34.1576	33.9309	33.5079	15.56	32.7527	35.0846	35.626	34.7347	34.4779	34.1513	15.56	32.7527	35.0846	35.626	34.6658	33.912	33.647		15.56	28.5474	33.9498	33.4383	32.8863	32.7781	15.56	30.897	33.9057	34.5719	33.6849	33.3116	15.56	30.897	33.9057	34.4779	34.0506	33.8616	33.3877	15.56	30.897	33.9057	34.4779	33.8931	33.1531	34.0191	33.5269	15.56	31.6584
15.6	33.5964	34.145	34.1387	33.8742	33.4889	15.6	32.7845	35.1843	35.6384	34.766	34.459	34.2204	15.6	32.7845	35.1843	35.6384	34.6846	33.9309	33.6154		15.6	28.5276	33.9309	33.432	32.9181	32.7527	15.6	30.8775	33.9372	34.5029	33.6975	33.3243	15.6	30.8775	33.9372	34.4716	34.0821	33.849	33.432	15.6	30.8775	33.9372	34.4716	33.975	33.1468	34.038	33.5459	15.6	31.7291
15.64	33.6407	34.1701	34.1953	33.8427	33.5775	15.64	32.9626	35.2404	35.6695	34.7785	34.5406	34.2393	15.64	32.9626	35.2404	35.6695	34.7535	33.9498	33.6027		15.64	28.5805	33.9813	33.47	32.9117	32.7399	15.64	30.8516	33.8994	34.5531	33.748	33.28	15.64	30.8516	33.8994	34.4528	34.0695	33.9246	33.5332	15.64	30.8516	33.8994	34.4528	33.9561	33.1975	34.1072	33.5206	15.64	31.6841
15.68	33.7038	34.1576	34.1827	33.8868	33.628	15.68	32.9563	35.3338	35.6508	34.7972	34.5594	34.2958	15.68	32.9563	35.3338	35.6508	34.766	33.9372	33.6596		15.68	28.5805	34.0758	33.5522	32.9753	32.7399	15.68	30.8128	33.8994	34.6095	33.767	33.299	15.68	30.8128	33.8994	34.4716	34.1198	33.9309	33.5269	15.68	30.8128	33.8994	34.4716	34.0002	33.1785	34.1198	33.5522	15.68	31.6905
15.72	33.7796	34.1009	34.145	33.9246	33.5775	15.72	32.8927	35.2902	35.6757	34.8598	34.6095	34.2519	15.72	32.8927	35.2902	35.6757	34.6721	33.9246	33.7038		15.72	28.64	34.0191	33.5395	33.0071	32.7463	15.72	30.8387	33.9183	34.622	33.767	33.337	15.72	30.8387	33.9183	34.4967	34.1261	33.8994	33.4953	15.72	30.8387	33.9183	34.4967	34.0506	33.1722	34.1135	33.5711	15.72	31.7355
15.8	33.7543	34.145	34.1953	33.9057	33.5711	15.8	32.899	35.2716	35.6012	34.7722	34.6345	34.2141	15.8	32.899	35.2716	35.6012	34.6909	34.0254	33.6786		15.8	28.6136	34.0254	33.5964	33.0071	32.7654	15.8	30.8711	33.8931	34.5969	33.7985	33.3813	15.8	30.8711	33.8931	34.6658	34.189	33.9246	33.4763	15.8	30.8711	33.8931	34.6658	34.0506	33.1468	34.0884	33.5459	15.8	31.7355
15.84	33.7165	34.145	34.1827	33.8868	33.5711	15.84	32.7972	35.2965	35.6012	34.8035	34.6345	34.189	15.84	32.7972	35.2965	35.6012	34.7159	34.0065	33.6849		15.84	28.5937	34.0254	33.6154	33.0134	32.8036	15.84	30.884	33.8805	34.5844	33.7859	33.356	15.84	30.884	33.8805	34.6471	34.1764	33.849	33.4383	15.84	30.884	33.8805	34.6471	34.0758	33.1404	34.0569	33.6407	15.84	31.7484
15.88	33.7543	34.145	34.2519	33.912	33.5838	15.88	32.7972	35.3649	35.7315	34.8973	34.5468	34.2833	15.88	32.7972	35.3649	35.7315	34.7722	33.9624	33.6343		15.88	28.6003	34.1261	33.6533	32.9626	32.8036	15.88	30.9034	33.9183	34.5844	33.8237	33.432	15.88	30.9034	33.9183	34.6345	34.1701	33.8553	33.4446	15.88	30.9034	33.9183	34.6345	34.0758	33.2419	34.0946	33.5142	15.88	31.6713
15.92	33.7543	34.1638	34.3524	34.0065	33.5016	15.92	32.8227	35.3961	35.7005	34.9847	34.5594	34.2644	15.92	32.8227	35.3961	35.7005	34.7785	33.9876	33.7354		15.92	28.5673	34.1198	33.6407	32.9753	32.8609	15.92	30.9358	33.9687	34.6345	33.8553	33.3877	15.92	30.9358	33.9687	34.6471	34.1953	33.8805	33.451	15.92	30.9358	33.9687	34.6471	34.0884	33.2419	34.1135	33.4826	15.92	31.652
15.96	33.7165	34.2393	34.2456	34.0065	33.5142	15.96	32.9117	35.2902	35.7315	34.9285	34.5782	34.3272	15.96	32.9117	35.2902	35.7315	34.8223	33.9876	33.7922		15.96	28.6532	34.0758	33.6596	32.9817	32.9563	15.96	30.9423	33.9813	34.6971	33.8427	33.4256	15.96	30.9423	33.9813	34.6596	34.189	33.9057	33.4763	15.96	30.9423	33.9813	34.6596	34.0695	33.2546	34.1324	33.628	15.96	31.6905
16	33.7291	34.2707	34.2958	33.9939	33.5964	16	32.9372	35.3276	35.6571	34.9722	34.5719	34.3586	16	32.9372	35.3276	35.6571	34.8285	34.0632	33.7101		16	28.6003	34.1198	33.6722	32.9626	32.9563	16	30.9876	34.0128	34.6846	33.9057	33.432	16	30.9876	34.0128	34.6658	34.1198	33.9435	33.5522	16	30.9876	34.0128	34.6658	34.0758	33.318	34.1387	33.6533	16	31.6777
16.04	33.767	34.2707	34.3084	34.0758	33.6533	16.04	33.0452	35.3214	35.7129	34.8473	34.5719	34.39	16.04	33.0452	35.3214	35.7129	34.8973	34.0632	33.7038		16.04	28.6003	34.0884	33.7228	32.9817	32.8927	16.04	30.9682	34.0065	34.7097	33.8427	33.47	16.04	30.9682	34.0065	34.7034	34.1387	34.0317	33.5522	16.04	30.9682	34.0065	34.7034	34.1261	33.2863	34.2204	33.6407	16.04	31.6584
16.08	33.6975	34.2456	34.2456	34.1009	33.6407	16.08	32.9563	35.3089	35.7563	34.8473	34.6283	34.2958	16.08	32.9563	35.3089	35.7563	34.866	34.1135	33.8616		16.08	28.6003	34.1072	33.6975	33.0261	32.9817	16.08	31.091	34.0946	34.6846	33.8994	33.4383	16.08	31.091	34.0946	34.6784	34.2267	34.1198	33.6217	16.08	31.091	34.0946	34.6784	34.2016	33.394	34.189	33.6659	16.08	31.7034
16.12	33.6912	34.277	34.2456	34.0443	33.6533	16.12	32.9817	35.452	35.7749	34.8348	34.6471	34.2581	16.12	32.9817	35.452	35.7749	34.916	34.0443	33.8048		16.12	28.6532	34.1324	33.6912	33.0325	32.9435	16.12	31.0329	34.0695	34.6909	33.8427	33.47	16.12	31.0329	34.0695	34.6971	34.2079	34.1009	33.5079	16.12	31.0329	34.0695	34.6971	34.189	33.3497	34.2581	33.6912	16.12	31.7098
16.16	33.7733	34.2707	34.2456	34.0506	33.647	16.16	32.969	35.4396	35.7625	34.9348	34.6345	34.3461	16.16	32.969	35.4396	35.7625	34.916	34.0317	33.7922		16.16	28.64	34.1387	33.7165	33.096	32.9626	16.16	30.9811	34.0758	34.6784	33.8994	33.5964	16.16	30.9811	34.0758	34.7034	34.2519	34.1198	33.5838	16.16	30.9811	34.0758	34.7034	34.0946	33.3687	34.2958	33.7354	16.16	31.6648
16.2	33.7859	34.3084	34.3524	34.0821	33.6786	16.2	33.0007	35.4147	35.8245	34.8598	34.6157	34.39	16.2	33.0007	35.4147	35.8245	34.9098	34.0128	33.8111		16.2	28.6532	34.2141	33.748	33.096	32.988	16.2	31.0458	34.0632	34.7472	33.9435	33.5711	16.2	31.0458	34.0632	34.7472	34.2519	34.1072	33.5332	16.2	31.0458	34.0632	34.7472	34.1764	33.3877	34.2958	33.748	16.2	31.6905
16.24	33.849	34.3147	34.3272	34.0569	33.6217	16.24	32.9117	35.3961	35.7439	34.8723	34.7222	34.3524	16.24	32.9117	35.3961	35.7439	34.9035	34.1135	33.7038		16.24	28.7127	34.2079	33.7291	33.1341	32.9753	16.24	31.0523	34.0946	34.7785	33.9435	33.5648	16.24	31.0523	34.0946	34.816	34.3272	34.0884	33.5332	16.24	31.0523	34.0946	34.816	34.1387	33.4003	34.2958	33.7606	16.24	31.742
16.28	33.7922	34.2958	34.3649	34.0821	33.6407	16.28	33.0579	35.3587	35.7873	34.9472	34.6533	34.3398	16.28	33.0579	35.3587	35.7873	34.916	34.1198	33.7101		16.28	28.7259	34.1701	33.7101	33.1151	32.969	16.28	31.091	34.1576	34.766	33.9687	33.5901	16.28	31.091	34.1576	34.8035	34.3272	34.1198	33.5395	16.28	31.091	34.1576	34.8035	34.0946	33.4256	34.3021	33.7354	16.28	31.7291
16.32	33.7796	34.3272	34.3712	34.1072	33.6786	16.32	32.9817	35.4769	35.8741	34.8785	34.7034	34.321	16.32	32.9817	35.4769	35.8741	34.991	34.1072	33.7291		16.32	28.7457	34.1576	33.7228	33.2039	32.8927	16.32	31.091	34.145	34.6846	33.9624	33.5142	16.32	31.091	34.145	34.841	34.3398	34.0946	33.5522	16.32	31.091	34.145	34.841	34.1324	33.4256	34.3398	33.7985	16.32	31.7034
16.36	33.7543	34.3524	34.4088	34.1135	33.7417	16.36	33.0007	35.4645	35.8803	34.991	34.7409	34.2833	16.36	33.0007	35.4645	35.8803	34.9285	34.0946	33.7796		16.36	28.6863	34.1827	33.7606	33.2736	32.8291	16.36	30.9811	34.0821	34.7034	33.9813	33.5522	16.36	30.9811	34.0821	34.866	34.3147	34.1009	33.5648	16.36	30.9811	34.0821	34.866	34.1638	33.4573	34.3712	33.6975	16.36	31.6134
16.4	33.7038	34.39	34.4841	34.0632	33.6912	16.4	32.9753	35.4831	35.8927	34.9847	34.7472	34.4277	16.4	32.9753	35.4831	35.8927	34.941	34.0695	33.849		16.4	28.6995	34.2204	33.7796	33.2609	32.8927	16.4	31.007	34.1513	34.766	34.0128	33.6217	16.4	31.007	34.1513	34.7972	34.2896	34.0695	33.6027	16.4	31.007	34.1513	34.7972	34.2141	33.47	34.3712	33.7733	16.4	31.8576
16.44	33.748	34.3963	34.4904	34.1198	33.7354	16.44	32.9944	35.508	35.9422	34.9785	34.7722	34.4277	16.44	32.9944	35.508	35.9422	34.991	34.1387	33.8174		16.44	28.7061	34.2519	33.8174	33.2292	32.81	16.44	30.994	34.1324	34.791	34.0632	33.6659	16.44	30.994	34.1324	34.7597	34.2833	34.0443	33.5901	16.44	30.994	34.1324	34.7597	34.1953	33.4763	34.3712	33.7922	16.44	31.8576
16.48	33.8237	34.4528	34.4402	34.0946	33.748	16.48	32.9817	35.4396	35.9298	34.8848	34.7472	34.4339	16.48	32.9817	35.4396	35.9298	34.9348	34.1135	33.8111		16.48	28.7193	34.2581	33.8237	33.1658	32.9499	16.48	31.0458	34.1701	34.8035	34.0506	33.5522	16.48	31.0458	34.1701	34.7722	34.3524	34.1198	33.5775	16.48	31.0458	34.1701	34.7722	34.3021	33.4573	34.3586	33.7733	16.48	31.742
16.52	33.8616	34.4277	34.4339	34.1009	33.7165	16.52	33.0134	35.4458	35.936	34.8535	34.7347	34.4214	16.52	33.0134	35.4458	35.936	34.9348	34.1072	33.9057		16.52	28.7589	34.1827	33.8553	33.1849	32.9626	16.52	31.0781	34.2016	34.8098	34.0317	33.628	16.52	31.0781	34.2016	34.7847	34.4214	34.145	33.6027	16.52	31.0781	34.2016	34.7847	34.2644	33.4826	34.2707	33.8048	16.52	31.7227
16.56	33.8742	34.3963	34.5406	34.2204	33.7165	16.56	33.0579	35.5391	35.9484	35.0783	34.7409	34.3461	16.56	33.0579	35.5391	35.9484	34.9472	34.1135	33.8805		16.56	28.7391	34.2456	33.8553	33.1975	32.9245	16.56	31.0781	34.1827	34.9472	34.0569	33.5838	16.56	31.0781	34.1827	34.7597	34.39	34.0443	33.6154	16.56	31.0781	34.1827	34.7597	34.277	33.4003	34.2958	33.767	16.56	31.7291
16.64	33.7859	34.3963	34.4904	34.2707	33.748	16.64	33.1151	35.5639	35.9856	35.0721	34.7409	34.3524	16.64	33.1151	35.5639	35.9856	34.9535	34.145	33.8868		16.64	28.8249	34.2707	33.83	33.2292	32.8481	16.64	31.091	34.1324	34.8785	34.0632	33.6091	16.64	31.091	34.1324	34.816	34.4088	34.1701	33.6154	16.64	31.091	34.1324	34.816	34.2896	33.4573	34.2581	33.7796	16.64	31.8255
16.68	33.8174	34.4088	34.4904	34.233	33.767	16.68	33.1595	35.508	35.9732	34.9722	34.8098	34.4088	16.68	33.1595	35.508	35.9732	34.8848	34.1576	33.83		16.68	28.8315	34.2707	33.8364	33.2229	32.8799	16.68	31.1169	34.1513	34.8785	34.0632	33.6659	16.68	31.1169	34.1513	34.8285	34.39	34.2016	33.6154	16.68	31.1169	34.1513	34.8285	34.2644	33.432	34.3398	33.8427	16.68	31.8255
16.72	33.8931	34.3963	34.4779	34.2079	33.6722	16.72	33.0897	35.6198	36.0165	35.0596	34.8223	34.459	16.72	33.0897	35.6198	36.0165	34.9348	34.2267	33.7733		16.72	28.8513	34.3398	33.8427	33.28	32.9563	16.72	31.1169	34.1135	34.9285	34.1324	33.6027	16.72	31.1169	34.1135	34.841	34.4214	34.1198	33.6027	16.72	31.1169	34.1135	34.841	34.2456	33.4256	34.3335	33.849	16.72	31.8383
16.76	33.8994	34.3649	34.4904	34.277	33.7796	16.76	33.1785	35.6012	35.9732	35.1719	34.816	34.459	16.76	33.1785	35.6012	35.9732	34.9348	34.233	33.8111		16.76	28.8117	34.3084	33.8364	33.299	32.9563	16.76	31.0199	34.1827	34.8973	34.1387	33.628	16.76	31.0199	34.1827	34.841	34.4904	34.2016	33.6596	16.76	31.0199	34.1827	34.841	34.233	33.4256	34.3272	33.8364	16.76	31.7805
16.8	33.9435	34.4088	34.4904	34.1764	33.7985	16.8	33.2356	35.5453	36.0103	35.122	34.8035	34.4653	16.8	33.2356	35.5453	36.0103	34.941	34.2079	33.83		16.8	28.7721	34.3084	33.9183	33.2673	32.9753	16.8	31.0717	34.2519	34.9098	34.1261	33.628	16.8	31.0717	34.2519	34.816	34.4716	34.2079	33.6912	16.8	31.0717	34.2519	34.816	34.2267	33.4636	34.39	33.8805	16.8	31.819
16.84	33.9561	34.4904	34.4967	34.1827	33.8553	16.84	33.2483	35.5453	36.0413	35.2155	34.841	34.4716	16.84	33.2483	35.5453	36.0413	34.9785	34.2833	33.8616		16.84	28.8117	34.3335	33.9561	33.2292	33.0261	16.84	31.0717	34.2707	34.9098	34.1198	33.5964	16.84	31.0717	34.2707	34.816	34.4465	34.2581	33.6154	16.84	31.0717	34.2707	34.816	34.2581	33.47	34.4151	33.8868	16.84	31.9217
16.88	33.8679	34.4653	34.528	34.2267	33.8174	16.88	33.1849	35.5142	36.0722	35.1656	34.866	34.4841	16.88	33.1849	35.5142	36.0722	34.9535	34.2519	33.9498		16.88	28.8183	34.3147	33.9246	33.2863	33.0833	16.88	31.0846	34.2141	34.9098	34.1513	33.6407	16.88	31.0846	34.2141	34.8535	34.4653	34.3084	33.6343	16.88	31.0846	34.2141	34.8535	34.2896	33.5079	34.3963	33.8931	16.88	31.8897
16.92	33.8679	34.4779	34.5969	34.2896	33.7985	16.92	33.1975	35.4707	36.0536	35.122	34.8285	34.4841	16.92	33.1975	35.4707	36.0536	35.0222	34.2141	33.975		16.92	28.6929	34.3586	33.9435	33.28	33.077	16.92	31.0587	34.233	34.9722	34.1638	33.6154	16.92	31.0587	34.233	34.9348	34.4841	34.3398	33.8048	16.92	31.0587	34.233	34.9348	34.2896	33.5269	34.3712	33.9309	16.92	31.9538
16.96	33.9561	34.4465	34.6283	34.3524	33.8679	16.96	33.2419	35.5391	36.0474	35.1906	34.8598	34.5406	16.96	33.2419	35.5391	36.0474	35.0284	34.233	33.9435		16.96	28.8117	34.3398	33.975	33.3433	33.1468	16.96	31.0975	34.2581	34.966	34.1324	33.628	16.96	31.0975	34.2581	34.9722	34.5029	34.3335	33.8111	16.96	31.0975	34.2581	34.9722	34.3398	33.5711	34.4528	34.0317	16.96	31.8576
17	33.8868	34.5029	34.6283	34.3586	33.8931	17	33.2609	35.5018	36.0413	35.203	34.8723	34.4967	17	33.2609	35.5018	36.0413	34.991	34.2456	34.0128		17	28.8249	34.3461	34.0002	33.3687	33.1404	17	31.0329	34.2707	34.9847	34.1638	33.7606	17	31.0329	34.2707	34.916	34.6408	34.3147	33.9624	17	31.0329	34.2707	34.916	34.3775	33.6027	34.4465	33.9309	17	31.9282
17.04	33.9813	34.5217	34.5969	34.3461	33.8994	17.04	33.2863	35.5328	36.0598	35.0783	34.866	34.4967	17.04	33.2863	35.5328	36.0598	34.9722	34.2519	33.9876		17.04	28.8381	34.3586	34.0569	33.337	33.1722	17.04	31.0458	34.2644	34.966	34.2079	33.7543	17.04	31.0458	34.2644	34.941	34.622	34.3084	33.9183	17.04	31.0458	34.2644	34.941	34.3335	33.5838	34.4904	33.9372	17.04	31.9089
17.08	33.9372	34.5217	34.6032	34.3524	33.9057	17.08	33.2292	35.5577	36.0722	35.0908	34.866	34.5907	17.08	33.2292	35.5577	36.0722	34.991	34.3021	33.9687		17.08	28.8051	34.3775	34.038	33.3243	33.1722	17.08	31.1557	34.2896	35.0846	34.1827	33.7606	17.08	31.1557	34.2896	34.9348	34.5844	34.321	33.8553	17.08	31.1557	34.2896	34.9348	34.2644	33.5079	34.4716	33.9876	17.08	31.9282
17.12	33.975	34.5217	34.6658	34.3335	33.912	17.12	33.2546	35.7129	36.0845	35.1158	34.9035	34.6345	17.12	33.2546	35.7129	36.0845	35.0783	34.321	34.0254		17.12	28.7919	34.39	34.0695	33.3623	33.1468	17.12	31.1427	34.2958	35.1095	34.189	33.7859	17.12	31.1427	34.2958	34.966	34.622	34.2896	33.8868	17.12	31.1427	34.2958	34.966	34.39	33.5332	34.5468	33.9687	17.12	31.9025
17.16	33.9057	34.4967	34.7097	34.459	34.0002	17.16	33.2292	35.7315	36.0598	35.1345	34.9223	34.6032	17.16	33.2292	35.7315	36.0598	35.0721	34.2958	33.9876		17.16	28.8513	34.3963	34.0254	33.3053	33.1468	17.16	31.1104	34.2644	35.0159	34.2079	33.7228	17.16	31.1104	34.2644	35.0159	34.6032	34.3586	33.8805	17.16	31.1104	34.2644	35.0159	34.3147	33.5079	34.5217	33.9183	17.16	31.9666
17.2	33.9183	34.5155	34.7535	34.4026	34.0065	17.2	33.1912	35.6508	35.9917	35.1656	34.916	34.6157	17.2	33.1912	35.6508	35.9917	35.1095	34.2958	34.0317		17.2	28.8711	34.4716	33.9813	33.299	33.1087	17.2	31.1492	34.2581	35.0159	34.233	33.7165	17.2	31.1492	34.2581	35.0534	34.5969	34.3649	33.8553	17.2	31.1492	34.2581	35.0534	34.4026	33.5522	34.5092	33.9309	17.2	31.9025
17.24	33.9183	34.5406	34.7347	34.3837	34.0002	17.24	33.2166	35.5204	36.0474	35.1594	34.9785	34.6971	17.24	33.2166	35.5204	36.0474	35.0783	34.3837	34.1324		17.24	28.8381	34.4214	34.0317	33.3053	33.1404	17.24	31.2073	34.2393	35.0034	34.2141	33.7291	17.24	31.2073	34.2393	35.0534	34.5782	34.3775	33.8364	17.24	31.2073	34.2393	35.0534	34.3398	33.5964	34.4465	33.9435	17.24	31.9666
17.28	33.9057	34.5844	34.7722	34.3963	33.9687	17.28	33.3053	35.5825	36.0289	35.1282	34.9847	34.7472	17.28	33.3053	35.5825	36.0289	35.1719	34.3649	34.0128		17.28	28.7853	34.4339	34.0946	33.4446	33.2292	17.28	31.2332	34.2958	35.0284	34.1953	33.7733	17.28	31.2332	34.2958	34.9847	34.5844	34.3398	33.8679	17.28	31.2332	34.2958	34.9847	34.4151	33.6343	34.5343	34.0443	17.28	31.9217
17.32	33.9057	34.6283	34.7222	34.3963	33.9876	17.32	33.2609	35.6384	36.0536	35.1532	35.0721	34.7222	17.32	33.2609	35.6384	36.0536	35.0846	34.3272	34.1324		17.32	28.8381	34.4716	34.1072	33.4383	33.2166	17.32	31.2396	34.2833	35.0534	34.2393	33.7291	17.32	31.2396	34.2833	34.9972	34.5217	34.3775	33.9246	17.32	31.2396	34.2833	34.9972	34.4026	33.6154	34.5907	34.0569	17.32	31.9474
17.36	33.9813	34.6283	34.7597	34.5029	34.0191	17.36	33.2736	35.6446	36.0722	35.1345	35.0471	34.7409	17.36	33.2736	35.6446	36.0722	35.0908	34.3021	34.1072		17.36	28.7259	34.4716	34.1135	33.4763	33.3243	17.36	31.2332	34.2833	34.9785	34.2707	33.7417	17.36	31.2332	34.2833	35.0222	34.5594	34.3963	33.9057	17.36	31.2332	34.2833	35.0222	34.4277	33.6407	34.5594	34.1261	17.36	31.9666
17.4	34.0002	34.6032	34.7535	34.5092	34.0317	17.4	33.4003	35.6633	36.0784	35.1719	35.0908	34.6721	17.4	33.4003	35.6633	36.0784	35.1407	34.2958	34.2267		17.4	28.7589	34.4528	34.1198	33.5079	33.299	17.4	31.2073	34.277	34.9972	34.2833	33.7417	17.4	31.2073	34.277	35.0222	34.5782	34.3837	33.9183	17.4	31.2073	34.277	35.0222	34.4841	33.6343	34.5719	34.0946	17.4	31.9346
17.44	34.0254	34.5907	34.6721	34.5155	34.0002	17.44	33.3687	35.6198	36.1464	35.2217	35.0347	34.7034	17.44	33.3687	35.6198	36.1464	35.1968	34.3649	34.2016		17.44	28.8117	34.4904	34.0946	33.4889	33.2546	17.44	31.2202	34.3084	35.0908	34.2519	33.7228	17.44	31.2202	34.3084	35.0347	34.6157	34.4026	33.7796	17.44	31.2202	34.3084	35.0347	34.5594	33.6407	34.4967	34.0946	17.44	31.9217
17.52	34.038	34.5217	34.7535	34.5594	33.9498	17.52	33.3307	35.6012	36.1958	35.228	35.0783	34.7159	17.52	33.3307	35.6012	36.1958	35.2217	34.4026	34.145		17.52	28.8249	34.5092	34.1135	33.47	33.3243	17.52	31.2396	34.3398	35.1033	34.2644	33.7101	17.52	31.2396	34.3398	35.0097	34.6658	34.4402	33.8994	17.52	31.2396	34.3398	35.0097	34.4967	33.7038	34.5844	34.038	17.52	31.9923
17.56	34.0065	34.6095	34.7472	34.4904	34.0002	17.56	33.3243	35.6819	36.1958	35.203	35.0409	34.7472	17.56	33.3243	35.6819	36.1958	35.1968	34.4088	34.145		17.56	28.7985	34.5406	34.1135	33.4636	33.337	17.56	31.2654	34.3147	35.1158	34.3084	33.748	17.56	31.2654	34.3147	35.1594	34.6095	34.4716	33.9687	17.56	31.2654	34.3147	35.1594	34.5155	33.6533	34.5782	34.0821	17.56	31.9923
17.6	34.0506	34.6032	34.7472	34.5217	34.0002	17.6	33.3307	35.7253	36.2082	35.2093	35.1282	34.8348	17.6	33.3307	35.7253	36.2082	35.228	34.5155	34.1261		17.6	28.7985	34.528	34.1576	33.5585	33.3877	17.6	31.2202	34.321	35.1158	34.3147	33.7543	17.6	31.2202	34.321	35.097	34.6784	34.459	33.9561	17.6	31.2202	34.321	35.097	34.4841	33.7291	34.528	34.0946	17.6	31.9666
17.64	34.038	34.6471	34.9785	34.5029	34.038	17.64	33.3243	35.7253	36.2205	35.2342	35.0846	34.8348	17.64	33.3243	35.7253	36.2205	35.2529	34.528	34.189		17.64	28.7523	34.4653	34.1261	33.5838	33.3497	17.64	31.1944	34.2581	35.1282	34.3272	33.7922	17.64	31.1944	34.2581	35.097	34.7972	34.5217	33.9372	17.64	31.1944	34.2581	35.097	34.459	33.7291	34.5406	34.1324	17.64	32.0115
17.68	34.0506	34.6909	34.891	34.4967	34.0317	17.68	33.3623	35.8059	36.1958	35.2902	35.0721	34.7722	17.68	33.3623	35.8059	36.1958	35.228	34.528	34.1638		17.68	28.7457	34.5155	34.1827	33.5711	33.3307	17.68	31.2138	34.3272	35.0908	34.3398	33.8174	17.68	31.2138	34.3272	35.097	34.7847	34.5217	33.9183	17.68	31.2138	34.3272	35.097	34.5531	33.7101	34.5468	34.1638	17.68	31.9987
17.72	34.0884	34.6721	34.9035	34.5969	34.1387	17.72	33.3877	35.8307	36.2452	35.5328	35.1407	34.7097	17.72	33.3877	35.8307	36.2452	35.2217	34.5155	34.1324		17.72	28.7787	34.5092	34.2644	33.5522	33.4067	17.72	31.1557	34.3586	35.2716	34.2896	33.7985	17.72	31.1557	34.3586	35.2529	34.7284	34.4779	33.9498	17.72	31.1557	34.3586	35.2529	34.5343	33.7354	34.5343	34.145	17.72	31.9987
17.76	34.0506	34.6533	34.8848	34.5907	34.0569	17.76	33.413	35.8617	36.2514	35.4893	35.1282	34.816	17.76	33.413	35.8617	36.2514	35.1968	34.5343	34.1827		17.76	28.8381	34.528	34.1513	33.5648	33.451	17.76	31.1686	34.3649	35.284	34.321	33.8553	17.76	31.1686	34.3649	35.2342	34.7347	34.5155	33.9246	17.76	31.1686	34.3649	35.2342	34.528	33.7417	34.528	34.1701	17.76	32.0564
17.8	34.1009	34.7535	34.8535	34.5656	34.0569	17.8	33.3243	35.7377	36.2452	35.3338	35.1781	34.8035	17.8	33.3243	35.7377	36.2452	35.2965	34.528	34.2519		17.8	28.8183	34.5594	34.1576	33.5079	33.3433	17.8	31.188	34.3775	35.3276	34.3335	33.8237	17.8	31.188	34.3775	35.1594	34.7222	34.5656	33.9813	17.8	31.188	34.3775	35.1594	34.5406	33.767	34.6095	34.1387	17.8	31.9795
17.84	34.1072	34.7284	34.8348	34.5656	34.0695	17.84	33.3307	35.7501	36.2143	35.4893	35.1719	34.8223	17.84	33.3307	35.7501	36.2143	35.3338	34.6658	34.2079		17.84	28.9568	34.6095	34.2204	33.5206	33.3623	17.84	31.2719	34.3335	35.3774	34.3775	33.9309	17.84	31.2719	34.3335	35.1781	34.6471	34.622	33.9246	17.84	31.2719	34.3335	35.1781	34.5092	33.7733	34.6032	34.2141	17.84	32.1076
17.88	34.1764	34.7409	34.7472	34.6095	34.1764	17.88	33.432	35.7811	36.2329	35.5018	35.1532	34.841	17.88	33.432	35.7811	36.2329	35.2778	34.6533	34.2016		17.88	28.9371	34.622	34.233	33.5332	33.3623	17.88	31.3106	34.3712	35.2155	34.3649	33.9435	17.88	31.3106	34.3712	35.1719	34.6846	34.6846	34.1072	17.88	31.3106	34.3712	35.1719	34.4904	33.7796	34.6533	34.0946	17.88	32.0948
17.92	34.1576	34.7347	34.7972	34.5907	34.1387	17.92	33.3877	35.7501	36.2761	35.4707	35.228	34.8535	17.92	33.3877	35.7501	36.2761	35.284	34.7159	34.2896		17.92	28.9371	34.5969	34.2079	33.5332	33.318	17.92	31.2977	34.459	35.2716	34.3398	33.9183	17.92	31.2977	34.459	35.2342	34.7472	34.6971	34.0317	17.92	31.2977	34.459	35.2342	34.5907	33.6849	34.6721	34.0821	17.92	31.8961
17.96	34.1009	34.7722	34.7847	34.5969	34.1764	17.96	33.3433	35.7563	36.2823	35.4707	35.1594	34.8848	17.96	33.3433	35.7563	36.2823	35.2902	34.6157	34.2267		17.96	28.9107	34.5594	34.2016	33.5585	33.3116	17.96	31.3299	34.4528	35.2965	34.3021	33.8994	17.96	31.3299	34.4528	35.3027	34.7597	34.6658	33.9876	17.96	31.3299	34.4528	35.3027	34.7097	33.7291	34.6721	34.1764	17.96	31.9666
18	34.0884	34.8098	34.791	34.7159	34.2141	18	33.3687	35.7625	36.2514	35.4272	35.1968	34.891	18	33.3687	35.7625	36.2514	35.2965	34.6909	34.145		18	28.9436	34.5844	34.2519	33.5395	33.2926	18	31.2783	34.4716	35.284	34.3335	33.8868	18	31.2783	34.4716	35.3089	34.8348	34.6658	34.1387	18	31.2783	34.4716	35.3089	34.6533	33.7228	34.7409	34.2141	18	32.0756
18.04	34.1135	34.791	34.866	34.7159	34.145	18.04	33.3877	35.8245	36.3502	35.5825	35.203	34.916	18.04	33.3877	35.8245	36.3502	35.2653	34.6658	34.189		18.04	28.8909	34.622	34.3147	33.5269	33.2546	18.04	31.3041	34.4026	35.284	34.3775	33.8364	18.04	31.3041	34.4026	35.3089	34.7785	34.6471	34.1827	18.04	31.3041	34.4026	35.3089	34.6345	33.7354	34.8598	34.189	18.04	32.1012
18.08	34.1072	34.7847	34.9285	34.6846	34.2079	18.08	33.4383	35.8865	36.3255	35.6446	35.3089	34.7159	18.08	33.4383	35.8865	36.3255	35.3463	34.5844	34.2016		18.08	28.9173	34.5656	34.2896	33.5711	33.2863	18.08	31.3299	34.4088	35.3214	34.4339	33.8679	18.08	31.3299	34.4088	35.3774	34.841	34.6721	34.1072	18.08	31.3299	34.4088	35.3774	34.791	33.7543	34.7972	34.2079	18.08	32.0948
18.12	34.0317	34.8223	34.9223	34.7222	34.2204	18.12	33.451	35.8803	36.3131	35.6322	35.2591	34.7472	18.12	33.451	35.8803	36.3131	35.3525	34.5907	34.2393		18.12	28.9107	34.6846	34.2707	33.5901	33.299	18.12	31.3751	34.5907	35.3089	34.4528	33.9309	18.12	31.3751	34.5907	35.3774	34.9285	34.622	34.1072	18.12	31.3751	34.5907	35.3774	34.7034	33.7543	34.7472	34.2519	18.12	32.0436
18.16	34.1198	34.966	34.9285	34.7222	34.2016	18.16	33.4763	35.8927	36.344	35.595	35.228	34.8035	18.16	33.4763	35.8927	36.344	35.4209	34.5782	34.2519		18.16	28.9305	34.6471	34.2581	33.6217	33.2609	18.16	31.3557	34.5782	35.3898	34.5029	33.9687	18.16	31.3557	34.5782	35.4147	34.8535	34.6846	34.0695	18.16	31.3557	34.5782	35.4147	34.6596	33.7859	34.7222	34.1764	18.16	32.05
18.2	34.1072	34.9535	34.941	34.7159	34.1072	18.2	33.451	35.9236	36.3316	35.5825	35.284	34.8848	18.2	33.451	35.9236	36.3316	35.3961	34.5907	34.2644		18.2	28.9041	34.6345	34.2581	33.6407	33.3053	18.2	31.3751	34.6658	35.3649	34.5343	34.0065	18.2	31.3751	34.6658	35.3836	34.7785	34.6784	34.0191	18.2	31.3751	34.6658	35.3836	34.6533	33.8111	34.7597	34.2707	18.2	32.0948
18.24	34.1198	34.866	34.9472	34.7034	34.1576	18.24	33.4763	35.9484	36.3625	35.5453	35.3089	34.8785	18.24	33.4763	35.9484	36.3625	35.4147	34.5907	34.3398		18.24	28.9305	34.6283	34.2581	33.6912	33.3877	18.24	31.3815	34.6283	35.3525	34.5719	34.0002	18.24	31.3815	34.6283	35.3712	34.8285	34.6533	34.0569	18.24	31.3815	34.6283	35.3712	34.6721	33.8616	34.7785	34.2896	18.24	32.1012
18.28	34.0884	34.8535	34.9847	34.6032	34.189	18.28	33.451	35.8245	36.3316	35.5328	35.2716	34.9223	18.28	33.451	35.8245	36.3316	35.3836	34.6095	34.2896		18.28	28.9568	34.6408	34.2833	33.6722	33.3623	18.28	31.3944	34.5468	35.3525	34.5719	34.0506	18.28	31.3944	34.5468	35.4707	34.8223	34.6784	33.9939	18.28	31.3944	34.5468	35.4707	34.6533	33.8679	34.7785	34.233	18.28	32.1525
18.32	34.2016	34.891	34.9785	34.6658	34.2519	18.32	33.4763	35.8803	36.3995	35.5142	35.2902	34.8973	18.32	33.4763	35.8803	36.3995	35.3649	34.6408	34.2581		18.32	28.9634	34.6471	34.3147	33.7101	33.4067	18.32	31.3751	34.5343	35.4396	34.5656	34.0443	18.32	31.3751	34.5343	35.4707	34.891	34.6596	34.0002	18.32	31.3751	34.5343	35.4707	34.766	33.8616	34.8223	34.2958	18.32	32.2037
18.4	34.1764	34.8973	34.9722	34.6345	34.2519	18.4	33.432	35.9298	36.4365	35.4831	35.2591	34.9722	18.4	33.432	35.9298	36.4365	35.3774	34.6721	34.2267		18.4	29.0293	34.6345	34.2141	33.7101	33.4193	18.4	31.4717	34.6533	35.4147	34.5594	34.0317	18.4	31.4717	34.6533	35.3712	34.8598	34.6846	34.0884	18.4	31.4717	34.6533	35.3712	34.766	33.8364	34.8098	34.2079	18.4	32.1845
18.44	34.2079	34.8848	34.9597	34.6095	34.1953	18.44	33.3307	35.9051	36.4735	35.4893	35.3898	34.9722	18.44	33.3307	35.9051	36.4735	35.3338	34.6658	34.2519		18.44	28.9766	34.6784	34.2644	33.6659	33.4067	18.44	31.4266	34.6095	35.4272	34.5719	34.0443	18.44	31.4266	34.6095	35.3774	34.841	34.6846	34.0821	18.44	31.4266	34.6095	35.3774	34.8223	33.8553	34.8098	34.3461	18.44	32.2101
18.48	34.2141	34.8598	34.9972	34.5594	34.2456	18.48	33.299	35.8803	36.4488	35.5825	35.3463	34.9535	18.48	33.299	35.8803	36.4488	35.2902	34.6658	34.2896		18.48	29.0095	34.7222	34.3524	33.647	33.375	18.48	31.388	34.6658	35.4085	34.5907	34.0317	18.48	31.388	34.6658	35.3774	34.8348	34.6784	34.145	18.48	31.388	34.6658	35.3774	34.8535	33.8994	34.7785	34.3586	18.48	32.1973
18.52	34.2079	34.8723	34.9597	34.6721	34.3461	18.52	33.3813	35.8493	36.4118	35.5701	35.3525	34.966	18.52	33.3813	35.8493	36.4118	35.3649	34.6596	34.3649		18.52	29.0095	34.7159	34.4277	33.7101	33.4573	18.52	31.3944	34.7222	35.4085	34.6095	34.0632	18.52	31.3944	34.7222	35.3961	34.841	34.6971	34.189	18.52	31.3944	34.7222	35.3961	34.816	33.9435	34.8723	34.1953	18.52	32.2421
18.56	34.189	34.9098	34.8785	34.7097	34.3461	18.56	33.5016	35.9546	36.4303	35.5701	35.34	34.9597	18.56	33.5016	35.9546	36.4303	35.3338	34.6721	34.3335		18.56	29.0161	34.916	34.39	33.6343	33.5206	18.56	31.3944	34.7097	35.4334	34.6095	34.038	18.56	31.3944	34.7097	35.4023	34.9223	34.6971	34.1198	18.56	31.3944	34.7097	35.4023	34.7597	33.8805	34.916	34.2707	18.56	32.1845
18.6	34.1638	35.0908	34.9035	34.7409	34.3272	18.6	33.4826	35.8865	36.4427	35.5453	35.3649	34.9972	18.6	33.4826	35.8865	36.4427	35.3214	34.6784	34.3335		18.6	28.9964	34.8223	34.3335	33.7165	33.5206	18.6	31.4202	34.622	35.4147	34.6032	34.0946	18.6	31.4202	34.622	35.4147	34.891	34.7785	34.1638	18.6	31.4202	34.622	35.4147	34.7535	33.912	34.8785	34.233	18.6	32.114
18.64	34.1764	35.0222	34.9722	34.816	34.3524	18.64	33.4636	35.9856	36.5105	35.6074	35.3649	34.9972	18.64	33.4636	35.9856	36.5105	35.4147	34.7159	34.3775		18.64	28.9832	34.6721	34.3837	33.7165	33.5395	18.64	31.4202	34.6471	35.4272	34.6157	34.1135	18.64	31.4202	34.6471	35.4147	34.8785	34.7785	34.1261	18.64	31.4202	34.6471	35.4147	34.7222	33.9309	34.8785	34.2267	18.64	32.0372
18.68	34.1953	34.9785	34.9722	34.841	34.2896	18.68	33.451	36.1031	36.5043	35.6012	35.3836	34.941	18.68	33.451	36.1031	36.5043	35.5453	34.7222	34.3586		18.68	28.9898	34.7034	34.3775	33.7165	33.5585	18.68	31.3815	34.5907	35.4583	34.622	34.0443	18.68	31.3815	34.5907	35.4458	34.9223	34.8473	34.1198	18.68	31.3815	34.5907	35.4458	34.8035	33.9624	34.866	34.2204	18.68	32.114
18.72	34.2581	34.9972	35.0409	34.7722	34.2581	18.72	33.4636	36.0289	36.5474	35.6012	35.3774	34.9722	18.72	33.4636	36.0289	36.5474	35.508	34.7847	34.4779		18.72	29.0095	34.8348	34.3963	33.8048	33.5332	18.72	31.4073	34.6471	35.5825	34.6784	34.038	18.72	31.4073	34.6471	35.5453	34.8848	34.7284	34.1324	18.72	31.4073	34.6471	35.5453	34.7847	33.9939	34.9535	34.3837	18.72	32.1525
18.76	34.2833	34.941	35.0471	34.7847	34.2833	18.76	33.5016	36.0165	36.529	35.6074	35.3525	34.991	18.76	33.5016	36.0165	36.529	35.5204	34.7409	34.4653		18.76	29.0293	34.8473	34.4026	33.83	33.5206	18.76	31.4653	34.6283	35.5639	34.6408	34.1638	18.76	31.4653	34.6283	35.5328	34.841	34.7722	34.189	18.76	31.4653	34.6283	35.5328	34.766	34.0317	34.941	34.3837	18.76	32.1845
18.8	34.3649	35.0034	35.0347	34.8098	34.3084	18.8	33.5269	36.0289	36.4981	35.6136	35.3774	34.9847	18.8	33.5269	36.0289	36.4981	35.4893	34.7222	34.321		18.8	28.9568	34.8535	34.5092	33.7922	33.4889	18.8	31.4331	34.6909	35.5639	34.6345	34.1701	18.8	31.4331	34.6909	35.5453	34.916	34.816	34.189	18.8	31.4331	34.6909	35.5453	34.7972	34.0317	34.9348	34.4402	18.8	32.1973
18.84	34.277	34.9972	35.0097	34.8973	34.3649	18.84	33.5964	36.0289	36.4612	35.595	35.4272	35.0409	18.84	33.5964	36.0289	36.4612	35.452	34.766	34.39		18.84	29.0491	34.8348	34.5092	33.8364	33.4953	18.84	31.4395	34.6846	35.5142	34.6596	34.1513	18.84	31.4395	34.6846	35.6074	34.9348	34.816	34.2204	18.84	31.4395	34.6846	35.6074	34.8473	34.0128	34.9098	34.4277	18.84	32.1845
18.88	34.2519	34.9972	35.0347	34.8723	34.4088	18.88	33.5016	36.0413	36.4797	35.5888	35.4272	35.0471	18.88	33.5016	36.0413	36.4797	35.6136	34.7284	34.4402		18.88	29.082	34.8285	34.5092	33.8427	33.4763	18.88	31.4911	34.7034	35.4956	34.7785	34.1638	18.88	31.4911	34.7034	35.5763	35.0471	34.866	34.3335	18.88	31.4911	34.7034	35.5763	34.9535	34.0317	34.941	34.4465	18.88	32.1525
18.92	34.2644	34.966	35.1532	34.816	34.3712	18.92	33.5711	36.0227	36.4673	35.5763	35.452	35.0846	18.92	33.5711	36.0227	36.4673	35.6074	34.7159	34.4841		18.92	28.9964	34.766	34.4904	33.7985	33.4636	18.92	31.4911	34.7097	35.5142	34.816	34.2204	18.92	31.4911	34.7097	35.5577	35.0034	34.8473	34.321	18.92	31.4911	34.7097	35.5577	34.8598	34.0569	34.8535	34.4465	18.92	32.114
18.96	34.2958	35.0284	35.1719	34.8723	34.4151	18.96	33.5838	36.0722	36.4797	35.5328	35.4707	35.0721	18.96	33.5838	36.0722	36.4797	35.5888	34.7722	34.4528		18.96	28.9371	34.7472	34.4528	33.8742	33.5206	18.96	31.4911	34.6721	35.5142	34.7284	34.321	18.96	31.4911	34.6721	35.5142	35.0409	34.8473	34.3335	18.96	31.4911	34.6721	35.5142	34.8473	34.0191	34.841	34.4465	18.96	32.1461
19	34.2833	35.0284	35.0347	34.791	34.3837	19	33.5838	36.0227	36.5043	35.4769	35.452	35.0471	19	33.5838	36.0227	36.5043	35.5763	34.7722	34.4841		19	28.97	34.7222	34.4967	33.849	33.5459	19	31.4524	34.6909	35.5453	34.6784	34.2519	19	31.4524	34.6909	35.5763	35.0284	34.8473	34.3272	19	31.4524	34.6909	35.5763	34.916	34.0569	34.8785	34.459	19	32.1781
19.04	34.2707	35.0471	35.0721	34.8035	34.4904	19.04	33.5838	36.0598	36.5228	35.5142	35.4583	35.0097	19.04	33.5838	36.0598	36.5228	35.5577	34.8223	34.4904		19.04	28.97	34.7159	34.5217	33.8931	33.6343	19.04	31.4653	34.6909	35.5266	34.7097	34.2079	19.04	31.4653	34.6909	35.4769	35.0721	34.8473	34.2267	19.04	31.4653	34.6909	35.4769	34.891	34.0758	34.8848	34.459	19.04	32.1717
19.08	34.3649	35.0596	35.0534	34.8598	34.4967	19.08	33.5522	36.0598	36.5413	35.6384	35.4334	35.0846	19.08	33.5522	36.0598	36.5413	35.5639	34.841	34.4653		19.08	29.0359	34.8223	34.5155	33.8742	33.6217	19.08	31.4782	34.7222	35.4707	34.7097	34.1701	19.08	31.4782	34.7222	35.4645	35.0659	34.9035	34.2393	19.08	31.4782	34.7222	35.4645	34.9285	34.0758	34.916	34.4779	19.08	32.1525
19.12	34.3084	35.0347	35.1282	34.8848	34.3837	19.12	33.5585	35.9236	36.5659	35.6695	35.452	35.1656	19.12	33.5585	35.9236	36.5659	35.6012	34.816	34.459		19.12	29.0491	34.7785	34.5343	33.8742	33.6154	19.12	31.4589	34.7034	35.4956	34.6909	34.1764	19.12	31.4589	34.7034	35.508	35.0284	34.9722	34.2644	19.12	31.4589	34.7034	35.508	35.0097	34.1135	34.9223	34.4716	19.12	32.1717
19.16	34.3398	35.0409	35.1469	34.8973	34.3837	19.16	33.5395	35.9794	36.5597	35.6384	35.4396	35.0846	19.16	33.5395	35.9794	36.5597	35.5825	34.791	34.5155		19.16	29.0359	34.7847	34.4653	33.849	33.6091	19.16	31.4331	34.7034	35.6322	34.7284	34.1764	19.16	31.4331	34.7034	35.5453	35.0908	34.9035	34.3963	19.16	31.4331	34.7034	35.5453	34.966	34.0695	34.9597	34.4277	19.16	32.1333
19.2	34.3147	35.0347	35.1345	34.8723	34.4026	19.2	33.5079	35.9732	36.5474	35.7501	35.452	35.1158	19.2	33.5079	35.9732	36.5474	35.5888	34.7722	34.4779		19.2	29.0095	34.791	34.528	33.7985	33.5964	19.2	31.4138	34.7097	35.6508	34.6721	34.2204	19.2	31.4138	34.7097	35.5701	35.1656	34.9472	34.4277	19.2	31.4138	34.7097	35.5701	34.941	34.0758	34.9597	34.4151	19.2	32.2165
19.28	34.2267	35.0783	35.0846	34.8535	34.3775	19.28	33.5585	36.1093	36.5659	35.7315	35.452	35.1158	19.28	33.5585	36.1093	36.5659	35.6633	34.816	34.4779		19.28	29.003	34.7597	34.5406	33.7859	33.5142	19.28	31.446	34.6846	35.6322	34.7159	34.189	19.28	31.446	34.6846	35.5701	35.1906	34.941	34.4214	19.28	31.446	34.6846	35.5701	35.0409	34.0884	34.9285	34.4465	19.28	32.2101
19.32	34.2896	35.0783	35.097	34.766	34.3775	19.32	33.5775	36.0536	36.5721	35.6943	35.3774	35.1033	19.32	33.5775	36.0536	36.5721	35.6384	34.8535	34.459		19.32	28.9832	34.7972	34.5656	33.7165	33.5711	19.32	31.5555	34.6909	35.626	34.7347	34.1953	19.32	31.5555	34.6909	35.626	35.1781	34.9597	34.3524	19.32	31.5555	34.6909	35.626	34.9785	34.0884	34.991	34.5092	19.32	32.1781
19.36	34.2456	35.1033	35.0721	34.791	34.4402	19.36	33.5269	36.0907	36.5721	35.6819	35.4831	35.0846	19.36	33.5269	36.0907	36.5721	35.6757	34.8598	34.459		19.36	28.97	34.8535	34.5719	33.7228	33.5901	19.36	31.4911	34.7284	35.6633	34.7159	34.1827	19.36	31.4911	34.7284	35.6322	35.1095	34.8973	34.3586	19.36	31.4911	34.7284	35.6322	34.9223	34.0821	35.0783	34.5092	19.36	32.1653
19.4	34.277	35.1345	35.1719	34.8598	34.459	19.4	33.647	36.066	36.5351	35.6508	35.4645	35.1469	19.4	33.647	36.066	36.5351	35.5825	34.8848	34.4402		19.4	28.9502	34.8098	34.6157	33.8174	33.6596	19.4	31.549	34.7097	35.6757	34.6909	34.2141	19.4	31.549	34.7097	35.595	35.1282	34.941	34.3461	19.4	31.549	34.7097	35.595	34.9285	34.0632	35.0471	34.5029	19.4	32.1973
19.44	34.2016	35.1656	35.1594	34.8723	34.4528	19.44	33.628	36.0722	36.5105	35.6695	35.4956	35.1906	19.44	33.628	36.0722	36.5105	35.5577	34.8598	34.4716		19.44	28.8909	34.8035	34.6283	33.9246	33.6912	19.44	31.5361	34.6971	35.6446	34.7409	34.2267	19.44	31.5361	34.6971	35.6136	35.0471	34.9348	34.3524	19.44	31.5361	34.6971	35.6136	34.9285	34.0506	35.0409	34.5217	19.44	32.2165
19.48	34.189	35.1656	35.1282	34.9472	34.459	19.48	33.6217	36.0845	36.5782	35.6943	35.5018	35.1158	19.48	33.6217	36.0845	36.5782	35.5888	34.8785	34.4779		19.48	28.9832	34.8848	34.5406	33.9372	33.6786	19.48	31.5683	34.7472	35.626	34.841	34.2393	19.48	31.5683	34.7472	35.6943	35.0659	34.9285	34.3586	19.48	31.5683	34.7472	35.6943	34.9972	34.0569	34.991	34.4339	19.48	32.2037
19.52	34.3272	35.1158	35.097	34.9285	34.4277	19.52	33.6091	36.1031	36.5782	35.6508	35.5577	35.1345	19.52	33.6091	36.1031	36.5782	35.5825	34.8848	34.4465		19.52	28.9832	34.9098	34.5531	34.0002	33.7291	19.52	31.5233	34.7284	35.6633	34.791	34.2393	19.52	31.5233	34.7284	35.6633	35.097	34.9535	34.3649	19.52	31.5233	34.7284	35.6633	34.941	34.0569	35.0097	34.4339	19.52	32.2037
19.56	34.2896	35.1968	35.1532	34.941	34.4465	19.56	33.647	36.1773	36.5782	35.6943	35.5763	35.1532	19.56	33.647	36.1773	36.5782	35.5328	34.8598	34.5217		19.56	28.9436	34.8785	34.6157	33.9876	33.7101	19.56	31.5104	34.7535	35.6881	34.8285	34.2016	19.56	31.5104	34.7535	35.6819	34.9972	35.0034	34.4339	19.56	31.5104	34.7535	35.6819	34.966	34.0946	35.0222	34.4904	19.56	32.2101
19.6	34.3586	35.1158	35.1407	35.0284	34.5155	19.6	33.647	36.1402	36.5351	35.6446	35.5453	35.2155	19.6	33.647	36.1402	36.5351	35.626	34.8785	34.5907		19.6	29.0161	34.8973	34.6032	33.975	33.767	19.6	31.4846	34.766	35.6198	34.8473	34.2393	19.6	31.4846	34.766	35.6198	35.1158	34.991	34.5217	19.6	31.4846	34.766	35.6198	35.0596	34.1261	35.1033	34.5092	19.6	32.2037
19.64	34.3586	35.1033	35.1158	35.0471	34.4904	19.64	33.7606	36.1711	36.5043	35.6757	35.5825	35.3027	19.64	33.7606	36.1711	36.5043	35.6198	34.891	34.6658		19.64	29.0359	34.916	34.5969	33.9246	33.7291	19.64	31.4653	34.7472	35.6881	34.8723	34.2707	19.64	31.4653	34.7472	35.6881	35.3027	35.0284	34.528	19.64	31.4653	34.7472	35.6881	35.0596	34.1701	35.1594	34.459	19.64	32.2229
19.68	34.4339	35.122	35.1843	35.0222	34.5217	19.68	33.7733	36.1217	36.4981	35.7067	35.6074	35.3276	19.68	33.7733	36.1217	36.4981	35.626	34.9223	34.6846		19.68	29.0556	34.866	34.5844	33.9309	33.7796	19.68	31.4782	34.7785	35.7501	34.8848	34.2833	19.68	31.4782	34.7785	35.7439	35.203	35.0222	34.4339	19.68	31.4782	34.7785	35.7439	35.0659	34.189	35.1843	34.4967	19.68	32.2996
19.72	34.321	35.2155	35.2217	34.991	34.5343	19.72	33.6596	36.1402	36.4488	35.7191	35.6384	35.3027	19.72	33.6596	36.1402	36.4488	35.6943	34.9098	34.7159		19.72	29.0293	34.8348	34.5844	33.9498	33.7543	19.72	31.4975	34.7409	35.7129	34.8535	34.2833	19.72	31.4975	34.7409	35.7625	35.2716	35.1719	34.4465	19.72	31.4975	34.7409	35.7625	35.0409	34.1953	35.1656	34.5029	19.72	32.1973
19.76	34.3649	35.1843	35.1968	35.0908	34.5844	19.76	33.6849	36.2329	36.4735	35.6695	35.6322	35.2653	19.76	33.6849	36.2329	36.4735	35.6508	34.866	34.6095		19.76	29.0951	34.8473	34.622	34.038	33.748	19.76	31.4782	34.766	35.6881	34.8848	34.2833	19.76	31.4782	34.766	35.7315	35.2778	35.1719	34.4653	19.76	31.4782	34.766	35.7315	35.0659	34.1135	35.1407	34.5029	19.76	32.2676
19.8	34.3649	35.1656	35.1719	35.1345	34.5656	19.8	33.748	36.1278	36.5597	35.7935	35.6446	35.3276	19.8	33.748	36.1278	36.5597	35.6446	34.9285	34.6471		19.8	29.0622	34.8535	34.6909	34.0002	33.7165	19.8	31.4911	34.766	35.6757	34.9098	34.4026	19.8	31.4911	34.766	35.7625	35.3276	35.1158	34.5217	19.8	31.4911	34.766	35.7625	35.0783	34.2267	35.1407	34.6032	19.8	32.2868
19.84	34.3021	35.1843	35.228	35.1095	34.5719	19.84	33.7543	36.1402	36.5659	35.7935	35.6695	35.3649	19.84	33.7543	36.1402	36.5659	35.6943	34.9535	34.7222		19.84	29.003	34.866	34.6784	34.0128	33.8111	19.84	31.4975	34.7535	35.7563	34.8848	34.2958	19.84	31.4975	34.7535	35.7439	35.3525	35.097	34.459	19.84	31.4975	34.7535	35.7439	35.1407	34.2581	35.2591	34.5969	19.84	32.274
19.88	34.2896	35.1906	35.1407	35.0846	34.5719	19.88	33.7354	36.134	36.5351	35.7687	35.6943	35.3587	19.88	33.7354	36.134	36.5351	35.7067	34.9972	34.7472		19.88	29.0951	34.9098	34.6721	34.0128	33.83	19.88	31.4782	34.7284	35.7315	34.916	34.3272	19.88	31.4782	34.7284	35.7315	35.3276	35.0846	34.4716	19.88	31.4782	34.7284	35.7315	35.1719	34.277	35.2529	34.5782	19.88	32.2996
19.92	34.3272	35.1719	35.2778	35.0596	34.622	19.92	33.7291	36.0598	36.5721	35.8865	35.6819	35.3525	19.92	33.7291	36.0598	36.5721	35.6819	34.9472	34.791		19.92	29.1017	34.9785	34.6971	34.0443	33.767	19.92	31.5168	34.7409	35.7377	34.9597	34.4402	19.92	31.5168	34.7409	35.8121	35.284	35.1033	34.5531	19.92	31.5168	34.7409	35.8121	35.1407	34.2833	35.2653	34.5844	19.92	32.2996
19.96	34.3775	35.1906	35.3214	35.1345	34.7034	19.96	33.7228	36.1217	36.5351	35.8555	35.6881	35.3276	19.96	33.7228	36.1217	36.5351	35.6819	34.9223	34.8473		19.96	29.0556	34.9223	34.6846	34.0191	33.7733	19.96	31.5168	34.816	35.7563	34.9785	34.3586	19.96	31.5168	34.816	35.8121	35.4209	35.1033	34.5969	19.96	31.5168	34.816	35.8121	35.122	34.3021	35.2778	34.5969	19.96	32.2676
20	34.3335	35.3525	35.2466	35.1656	34.5907	20	33.748	36.1402	36.5536	35.8493	35.7315	35.3027	20	33.748	36.1402	36.5536	35.6819	34.9597	34.7722		20	29.0227	34.9597	34.7347	34.1261	33.7859	20	31.4782	34.7597	35.7439	34.9722	34.3649	20	31.4782	34.7597	35.7997	35.2902	35.122	34.5844	20	31.4782	34.7597	35.7997	35.1282	34.2833	35.2529	34.6032	20	32.2804
20.04	34.3398	35.2965	35.3089	35.1158	34.6032	20.04	33.7165	36.1587	36.5413	35.8183	35.7563	35.3027	20.04	33.7165	36.1587	36.5413	35.7005	34.9972	34.7972		20.04	29.0095	34.9722	34.7284	34.1513	33.7228	20.04	31.6134	34.766	35.7439	34.916	34.3712	20.04	31.6134	34.766	35.7811	35.3089	35.1282	34.5969	20.04	31.6134	34.766	35.7811	35.1469	34.2393	35.2404	34.6971	20.04	32.2293
20.12	34.3963	35.3214	35.2653	35.1282	34.6283	20.12	33.6533	36.1835	36.5597	35.8369	35.7005	35.3587	20.12	33.6533	36.1835	36.5597	35.7067	35.0659	34.7972		20.12	29.0227	34.891	34.7472	34.1261	33.6596	20.12	31.6134	34.8785	35.8307	34.9348	34.39	20.12	31.6134	34.8785	35.8245	35.2716	35.1095	34.5969	20.12	31.6134	34.8785	35.8245	35.097	34.2204	35.228	34.7409	20.12	32.2676
20.16	34.4277	35.3276	35.3525	35.2155	34.5782	20.16	33.7228	36.1464	36.6029	35.7873	35.7191	35.4769	20.16	33.7228	36.1464	36.6029	35.7253	35.0783	34.8473		20.16	29.0754	34.8348	34.7284	34.0946	33.7606	20.16	31.5748	34.8473	35.8493	34.9722	34.4151	20.16	31.5748	34.8473	35.8927	35.3089	35.1282	34.4967	20.16	31.5748	34.8473	35.8927	35.1719	34.2707	35.2591	34.7785	20.16	32.306
20.2	34.3147	35.3463	35.3712	35.122	34.622	20.2	33.7985	36.2082	36.6029	35.8245	35.7625	35.452	20.2	33.7985	36.2082	36.6029	35.7253	35.0284	34.7847		20.2	29.0951	34.8598	34.7347	34.1135	33.7354	20.2	31.5876	34.791	35.7563	34.9535	34.3649	20.2	31.5876	34.791	35.8493	35.3836	35.1345	34.4904	20.2	31.5876	34.791	35.8493	35.1407	34.3461	35.2342	34.7597	20.2	32.3316
20.24	34.3147	35.3214	35.3836	35.1158	34.6095	20.24	33.8427	36.1402	36.5844	35.8617	35.7191	35.4334	20.24	33.8427	36.1402	36.5844	35.7563	35.1095	34.816		20.24	28.9832	34.9035	34.7284	34.1198	33.7796	20.24	31.6005	34.8473	35.8183	34.9722	34.3712	20.24	31.6005	34.8473	35.8803	35.3961	35.228	34.5155	20.24	31.6005	34.8473	35.8803	35.1158	34.3398	35.2342	34.766	20.24	32.338
20.28	34.3586	35.3774	35.3649	35.1469	34.622	20.28	33.83	36.2082	36.6336	35.8865	35.7067	35.4209	20.28	33.83	36.2082	36.6336	35.7315	35.097	34.7972		20.28	29.0293	34.9223	34.7347	34.1072	33.767	20.28	31.6069	34.7785	35.8183	34.9722	34.4151	20.28	31.6069	34.7785	35.8431	35.3214	35.203	34.6408	20.28	31.6069	34.7785	35.8431	35.122	34.3461	35.2778	34.7097	20.28	32.3316
20.32	34.4026	35.3276	35.4645	35.1781	34.6345	20.32	33.8111	36.2082	36.6459	35.8989	35.6695	35.4209	20.32	33.8111	36.2082	36.6459	35.7563	35.1345	34.7597		20.32	29.0425	34.9285	34.7722	34.0946	33.7796	20.32	31.5619	34.7597	35.7501	34.9972	34.4277	20.32	31.5619	34.7597	35.7501	35.3089	35.2093	34.5782	20.32	31.5619	34.7597	35.7501	35.1656	34.3147	35.2778	34.7034	20.32	32.3891
20.36	34.4151	35.3338	35.3587	35.1656	34.6283	20.36	33.7417	36.1835	36.6767	35.8431	35.6695	35.452	20.36	33.7417	36.1835	36.6767	35.8679	35.203	34.7535		20.36	29.0622	34.9035	34.7722	34.0946	33.7733	20.36	31.5619	34.791	35.7811	35.0284	34.4088	20.36	31.5619	34.791	35.7687	35.2965	35.2778	34.5656	20.36	31.5619	34.791	35.7687	35.1719	34.3586	35.2342	34.6533	20.36	32.3252
20.4	34.3398	35.3587	35.3836	35.1656	34.6157	20.4	33.7165	36.2267	36.6459	36.0722	35.7377	35.4334	20.4	33.7165	36.2267	36.6459	35.8803	35.2155	34.7785		20.4	29.0095	34.9722	34.7972	34.0884	33.7796	20.4	31.5233	34.7472	35.8803	34.9847	34.4402	20.4	31.5233	34.7472	35.8555	35.3152	35.2404	34.5406	20.4	31.5233	34.7472	35.8555	35.1968	34.3398	35.228	34.7535	20.4	32.274
20.44	34.233	35.3089	35.3961	35.203	34.7097	20.44	33.6343	36.1773	36.8734	35.9794	35.8059	35.452	20.44	33.6343	36.1773	36.8734	35.9236	35.1532	34.7034		20.44	29.2136	34.9098	34.8285	34.1009	33.7417	20.44	31.4395	34.791	35.9236	35.0159	34.4528	20.44	31.4395	34.791	35.8679	35.4147	35.2217	34.5406	20.44	31.4395	34.791	35.8679	35.2529	34.3272	35.3774	34.7409	20.44	32.2549
20.48	34.321	35.3276	35.3898	35.2778	34.7222	20.48	33.7354	36.1526	36.7874	35.9546	35.8307	35.4831	20.48	33.7354	36.1526	36.7874	35.8989	35.1656	34.7284		20.48	29.2136	34.9785	34.7785	34.2204	33.7606	20.48	31.504	34.7972	35.9608	35.0721	34.459	20.48	31.504	34.7972	35.9113	35.4209	35.228	34.5594	20.48	31.504	34.7972	35.9113	35.2591	34.3586	35.3587	34.766	20.48	32.2612
20.52	34.4528	35.3898	35.3152	35.3587	34.5969	20.52	33.7165	36.1711	36.812	35.9484	35.7811	35.4707	20.52	33.7165	36.1711	36.812	35.9422	35.1719	34.7472		20.52	29.1609	34.916	34.791	34.2519	33.7985	20.52	31.5297	34.7972	35.936	35.0596	34.4528	20.52	31.5297	34.7972	35.9113	35.4645	35.2342	34.5907	20.52	31.5297	34.7972	35.9113	35.3214	34.3963	35.3587	34.7472	20.52	32.274
20.56	34.4967	35.4023	35.3587	35.3587	34.622	20.56	33.7101	36.202	36.8366	35.9856	35.7439	35.4645	20.56	33.7101	36.202	36.8366	35.9236	35.1906	34.7472		20.56	29.1478	34.941	34.8535	34.2204	33.8048	20.56	31.5233	34.816	35.9051	35.0347	34.4277	20.56	31.5233	34.816	35.8431	35.3276	35.2404	34.4904	20.56	31.5233	34.816	35.8431	35.2529	34.4402	35.3898	34.8035	20.56	32.3316
20.6	34.4904	35.3961	35.3898	35.3463	34.6157	20.6	33.7291	36.2638	36.8304	36.0289	35.9113	35.4893	20.6	33.7291	36.2638	36.8304	36.0103	35.1781	34.7409		20.6	29.1346	34.9722	34.8848	34.233	33.849	20.6	31.446	34.8598	35.9113	35.0659	34.4779	20.6	31.446	34.8598	35.8679	35.4147	35.2591	34.6095	20.6	31.446	34.8598	35.8679	35.3152	34.3712	35.4272	34.8723	20.6	32.3891
20.64	34.321	35.4645	35.3961	35.3463	34.6971	20.64	33.767	36.2576	36.8243	35.967	35.8741	35.5204	20.64	33.767	36.2576	36.8243	36.0103	35.203	34.7722		20.64	29.1149	34.9722	34.9348	34.1953	33.8111	20.64	31.446	34.866	35.8989	35.1033	34.5155	20.64	31.446	34.866	35.8555	35.4396	35.2653	34.4653	20.64	31.446	34.866	35.8555	35.3712	34.3963	35.3587	34.766	20.64	32.3316
20.68	34.3586	35.452	35.4334	35.3338	34.7097	20.68	33.7543	36.3255	36.855	35.9608	35.9236	35.5018	20.68	33.7543	36.3255	36.855	36.0041	35.2466	34.8535		20.68	29.082	35.0097	34.9035	34.1638	33.8237	20.68	31.4009	34.8535	35.967	35.0846	34.4402	20.68	31.4009	34.8535	35.8431	35.4893	35.2902	34.5656	20.68	31.4009	34.8535	35.8431	35.3712	34.4277	35.3649	34.8473	20.68	32.274
20.72	34.39	35.4707	35.4645	35.3338	34.8098	20.72	33.7417	36.3687	36.8673	36.0103	35.7501	35.5142	20.72	33.7417	36.3687	36.8673	35.9917	35.2466	34.891		20.72	29.0886	34.9785	34.866	34.2393	33.7985	20.72	31.4202	34.8535	35.9298	35.0783	34.4339	20.72	31.4202	34.8535	35.8927	35.5577	35.2778	34.7347	20.72	31.4202	34.8535	35.8927	35.3649	34.4402	35.3649	34.8098	20.72	32.2549
20.76	34.3963	35.4334	35.452	35.2217	34.7284	20.76	33.7859	36.3933	36.8734	36.0227	35.7005	35.5515	20.76	33.7859	36.3933	36.8734	36.0598	35.228	34.866		20.76	29.1741	34.941	34.9472	34.2267	33.83	20.76	31.5168	34.8973	36.0598	35.1158	34.4026	20.76	31.5168	34.8973	35.8865	35.5018	35.2716	34.7472	20.76	31.5168	34.8973	35.8865	35.3525	34.4528	35.3649	34.8348	20.76	32.3124
20.8	34.4088	35.4023	35.5825	35.284	34.7347	20.8	33.8048	36.381	36.9287	36.0474	35.7997	35.5204	20.8	33.8048	36.381	36.9287	35.9979	35.1843	34.8473		20.8	29.2004	34.9722	34.866	34.2644	33.8679	20.8	31.5104	34.9785	36.0165	35.0908	34.4528	20.8	31.5104	34.9785	35.9422	35.508	35.2902	34.6784	20.8	31.5104	34.9785	35.9422	35.4645	34.4026	35.3961	34.841	20.8	32.306
20.84	34.4339	35.4147	35.5328	35.3214	34.7034	20.84	33.7733	36.3316	36.941	36.0413	35.8183	35.5391	20.84	33.7733	36.3316	36.941	35.9917	35.1781	34.841		20.84	29.2267	35.0097	34.8785	34.2833	33.8364	20.84	31.5233	34.9597	36.0536	35.097	34.4339	20.84	31.5233	34.9597	35.967	35.5142	35.2965	34.6784	20.84	31.5233	34.9597	35.967	35.4334	34.459	35.3525	34.8723	20.84	32.338
20.88	34.4214	35.452	35.5266	35.452	34.7972	20.88	33.767	36.3687	36.9287	36.0907	35.7997	35.5142	20.88	33.767	36.3687	36.9287	36.0536	35.1719	34.8723		20.88	29.2267	34.9722	34.9035	34.277	33.8364	20.88	31.5683	34.9597	36.0969	35.0908	34.4214	20.88	31.5683	34.9597	35.9732	35.4893	35.3338	34.7034	20.88	31.5683	34.9597	35.9732	35.3712	34.4779	35.3961	34.8598	20.88	32.3571
20.92	34.5343	35.4831	35.5391	35.4583	34.7847	20.92	33.767	36.418	36.9778	36.1649	35.8865	35.5639	20.92	33.767	36.418	36.9778	36.1155	35.2155	34.8785		20.92	29.3647	34.9722	34.916	34.1953	33.8364	20.92	31.5941	34.9535	36.0474	35.1095	34.459	20.92	31.5941	34.9535	35.967	35.5266	35.3587	34.528	20.92	31.5941	34.9535	35.967	35.3214	34.528	35.3836	34.8348	20.92	32.3891
21	34.528	35.4769	35.5391	35.452	34.7347	21	33.8364	36.4303	36.9594	36.134	35.967	35.595	21	33.8364	36.4303	36.9594	36.0474	35.2342	34.866		21	29.3647	34.9847	34.916	34.1953	33.8111	21	31.4975	34.9223	35.9175	35.1469	34.4151	21	31.4975	34.9223	35.9113	35.5577	35.34	34.7409	21	31.4975	34.9223	35.9113	35.3836	34.5468	35.4707	34.8848	21	32.453
21.04	34.4904	35.4707	35.626	35.2902	34.7409	21.04	33.8427	36.4118	36.9226	36.1958	35.936	35.5515	21.04	33.8427	36.4118	36.9226	36.066	35.1906	34.9722		21.04	29.3384	34.9847	34.8973	34.2079	33.8174	21.04	31.5555	34.941	35.9236	35.1781	34.4151	21.04	31.5555	34.941	35.9422	35.6012	35.3027	34.6909	21.04	31.5555	34.941	35.9422	35.4147	34.5594	35.3961	34.916	21.04	32.4466
21.08	34.5155	35.4956	35.626	35.3214	34.7535	21.08	33.7859	36.5351	36.9103	36.1587	35.9113	35.4831	21.08	33.7859	36.5351	36.9103	36.0536	35.2093	34.891		21.08	29.2399	35.097	34.8723	34.2079	33.8174	21.08	31.5555	34.8848	35.9732	35.1719	34.4151	21.08	31.5555	34.8848	35.936	35.5763	35.3152	34.6533	21.08	31.5555	34.8848	35.936	35.4956	34.5656	35.4272	34.916	21.08	32.4338
21.12	34.5969	35.5453	35.5701	35.284	34.7347	21.12	33.7985	36.5474	36.9471	36.0722	35.8989	35.5577	21.12	33.7985	36.5474	36.9471	36.0413	35.228	34.9472		21.12	29.2662	35.0659	34.9348	34.2393	33.8364	21.12	31.652	34.9223	36.0413	35.1781	34.459	21.12	31.652	34.9223	35.9546	35.5577	35.4023	34.6533	21.12	31.652	34.9223	35.9546	35.4831	34.6784	35.4583	34.9972	21.12	32.3635
21.16	34.5468	35.6136	35.5453	35.3089	34.7785	21.16	33.8868	36.4365	36.9901	36.1093	35.8927	35.6074	21.16	33.8868	36.4365	36.9901	36.0413	35.2902	34.9847		21.16	29.299	35.0347	34.9098	34.1827	33.8679	21.16	31.6134	34.9847	36.0536	35.2155	34.459	21.16	31.6134	34.9847	35.9546	35.5577	35.4707	34.7472	21.16	31.6134	34.9847	35.9546	35.508	34.7347	35.4707	35.0347	21.16	32.4594
21.2	34.6283	35.5888	35.595	35.3214	34.7284	21.2	33.8994	36.4488	36.9287	36.134	35.8803	35.6136	21.2	33.8994	36.4488	36.9287	35.9856	35.2591	34.991		21.2	29.345	35.0159	34.891	34.2079	33.8237	21.2	31.6005	35.0159	36.0536	35.1968	34.5029	21.2	31.6005	35.0159	36.0103	35.5763	35.4334	34.7535	21.2	31.6005	35.0159	36.0103	35.4085	34.5719	35.5018	35.0347	21.2	32.4977
21.24	34.6784	35.6012	35.5391	35.3649	34.8098	21.24	33.8553	36.4673	36.9532	36.0722	35.8865	35.6322	21.24	33.8553	36.4673	36.9532	36.0907	35.2217	34.9785		21.24	29.299	35.0159	34.9223	34.2079	33.8616	21.24	31.5812	35.1656	36.0474	35.2529	34.5406	21.24	31.5812	35.1656	36.066	35.626	35.4147	34.7597	21.24	31.5812	35.1656	36.066	35.3649	34.5531	35.4707	34.9535	21.24	32.4849
21.28	34.5844	35.5453	35.5328	35.3649	34.866	21.28	33.8679	36.4612	36.9041	36.0784	35.9175	35.5391	21.28	33.8679	36.4612	36.9041	36.0784	35.2902	34.9035		21.28	29.3647	34.9847	34.9972	34.3021	33.8805	21.28	31.5683	35.1033	36.0351	35.284	34.5217	21.28	31.5683	35.1033	36.0103	35.5825	35.4272	34.8848	21.28	31.5683	35.1033	36.0103	35.4707	34.6157	35.5018	35.0097	21.28	32.4146
21.32	34.5907	35.5328	35.5515	35.3587	34.7847	21.32	33.9057	36.4488	36.9103	36.2452	35.9608	35.5888	21.32	33.9057	36.4488	36.9103	36.0351	35.2965	34.9223		21.32	29.3384	35.0284	34.9472	34.3272	33.83	21.32	31.5941	35.0721	36.0227	35.2529	34.5343	21.32	31.5941	35.0721	36.0969	35.5577	35.4893	34.8598	21.32	31.5941	35.0721	36.0969	35.4707	34.6095	35.5266	35.0783	21.32	32.4274
21.36	34.6095	35.5825	35.4893	35.3649	34.8598	21.36	33.9498	36.3255	36.9594	36.2391	35.9546	35.595	21.36	33.9498	36.3255	36.9594	36.0969	35.2778	34.9472		21.36	29.4106	35.0471	34.966	34.3335	33.9057	21.36	31.6327	35.0846	36.0103	35.2778	34.5343	21.36	31.6327	35.0846	36.1711	35.6012	35.4769	34.8348	21.36	31.6327	35.0846	36.1711	35.5328	34.6596	35.6074	35.0783	21.36	32.4849
21.4	34.5029	35.595	35.5515	35.3836	34.8348	21.4	33.9876	36.3687	36.9839	36.1649	35.9856	35.6384	21.4	33.9876	36.3687	36.9839	36.0722	35.3463	35.0347		21.4	29.391	35.0783	35.0097	34.3586	33.83	21.4	31.5748	35.0846	35.9794	35.3152	34.5782	21.4	31.5748	35.0846	36.1711	35.6881	35.5328	34.8348	21.4	31.5748	35.0846	36.1711	35.5639	34.7159	35.6571	34.966	21.4	32.4338
21.44	34.4967	35.6074	35.595	35.4272	34.8473	21.44	33.9813	36.4858	37.0146	36.1835	35.9422	35.626	21.44	33.9813	36.4858	37.0146	36.0784	35.3463	35.0284		21.44	29.3253	35.0596	35.0596	34.3586	33.8994	21.44	31.6713	35.0908	36.0413	35.2653	34.622	21.44	31.6713	35.0908	36.1896	35.626	35.5453	34.7847	21.44	31.6713	35.0908	36.1896	35.5266	34.6909	35.6571	35.0222	21.44	32.3444
21.48	34.5343	35.6633	35.5639	35.4023	34.8535	21.48	33.912	36.529	36.9041	36.2514	35.9546	35.6384	21.48	33.912	36.529	36.9041	36.1464	35.3152	35.0908		21.48	29.345	35.1469	35.1033	34.321	33.9183	21.48	31.6905	35.1282	36.0536	35.2965	34.5531	21.48	31.6905	35.1282	36.1649	35.6074	35.5018	34.8973	21.48	31.6905	35.1282	36.1649	35.5391	34.7472	35.6012	34.991	21.48	32.421
21.52	34.5217	35.626	35.595	35.4209	34.9285	21.52	33.912	36.529	36.9348	36.2884	35.9732	35.6446	21.52	33.912	36.529	36.9348	36.1402	35.3089	35.1033		21.52	29.3187	35.1532	35.1033	34.3586	33.9309	21.52	31.6455	35.1906	36.134	35.3587	34.6658	21.52	31.6455	35.1906	36.1896	35.6198	35.5888	34.9035	21.52	31.6455	35.1906	36.1896	35.5577	34.7159	35.5888	34.991	21.52	32.4594
21.56	34.6596	35.6384	35.7501	35.3898	34.9098	21.56	33.9624	36.5105	36.9655	36.1835	35.9051	35.626	21.56	33.9624	36.5105	36.9655	36.1587	35.3214	35.097		21.56	29.3056	35.1282	35.1033	34.3837	33.9435	21.56	31.6584	35.1594	36.2267	35.3774	34.6846	21.56	31.6584	35.1594	36.1835	35.6446	35.5639	34.8473	21.56	31.6584	35.1594	36.1835	35.5266	34.6909	35.5888	35.0534	21.56	32.4657
21.6	34.622	35.6198	35.7067	35.3712	34.9098	21.6	33.9939	36.4797	36.9839	36.1958	36.0289	35.6384	21.6	33.9939	36.4797	36.9839	36.134	35.3774	35.0409		21.6	29.3187	35.1158	35.0721	34.3524	33.9435	21.6	31.7484	35.0409	36.1649	35.3214	34.6909	21.6	31.7484	35.0409	36.1526	35.5888	35.5825	34.7972	21.6	31.7484	35.0409	36.1526	35.5453	34.7034	35.5888	35.0222	21.6	32.4402
21.64	34.5531	35.6136	35.7191	35.508	34.9035	21.64	33.912	36.5844	36.9778	36.2452	36.0413	35.6508	21.64	33.912	36.5844	36.9778	36.0536	35.3649	35.1158		21.64	29.2793	35.1407	35.0659	34.3649	33.9561	21.64	31.7291	35.0659	36.1526	35.2965	34.5844	21.64	31.7291	35.0659	36.1464	35.6695	35.5204	34.7847	21.64	31.7291	35.0659	36.1464	35.5328	34.6909	35.5888	34.9972	21.64	32.4402
21.68	34.5468	35.6198	35.8059	35.5018	34.916	21.68	34.0128	36.5967	36.9103	36.2143	36.0103	35.6757	21.68	34.0128	36.5967	36.9103	36.0722	35.3898	35.1282		21.68	29.2793	35.1532	35.1282	34.3712	34.0506	21.68	31.7163	35.097	36.1464	35.3027	34.6533	21.68	31.7163	35.097	36.1896	35.7315	35.508	34.866	21.68	31.7163	35.097	36.1896	35.4769	34.6784	35.6322	35.0534	21.68	32.421
21.72	34.6032	35.6508	35.6881	35.5018	34.9535	21.72	33.9813	36.5413	36.941	36.1896	36.0474	35.7005	21.72	33.9813	36.5413	36.941	36.0722	35.4334	35.1532		21.72	29.299	35.1532	35.1594	34.39	34.0569	21.72	31.7098	35.0534	36.2946	35.3027	34.7535	21.72	31.7098	35.0534	36.0784	35.8865	35.5577	34.8348	21.72	31.7098	35.0534	36.0784	35.4707	34.6721	35.6074	35.0534	21.72	32.4466
21.76	34.6283	35.7191	35.7687	35.4956	34.8473	21.76	33.9939	36.529	37.0146	36.2205	36.0351	35.7191	21.76	33.9939	36.529	37.0146	36.1217	35.4645	35.0783		21.76	29.4303	35.1407	35.1469	34.459	34.1072	21.76	31.7163	35.0534	36.1773	35.2653	34.791	21.76	31.7163	35.0534	36.1587	35.7873	35.452	34.866	21.76	31.7163	35.0534	36.1587	35.4956	34.6846	35.6198	35.0534	21.76	32.5487
21.84	34.6283	35.6322	35.6136	35.4272	34.941	21.84	33.9435	36.5844	37.0514	36.2452	36.0289	35.7129	21.84	33.9435	36.5844	37.0514	36.1217	35.4396	35.0659		21.84	29.2924	35.1594	35.1282	34.5217	34.1135	21.84	31.7163	35.122	36.1526	35.3027	34.766	21.84	31.7163	35.122	36.1649	35.7625	35.452	34.8973	21.84	31.7163	35.122	36.1649	35.5018	34.6784	35.5577	35.0596	21.84	32.5359
21.88	34.6157	35.6322	35.6012	35.3525	34.966	21.88	33.9624	36.5782	37.0023	36.1958	36.0289	35.6446	21.88	33.9624	36.5782	37.0023	36.1093	35.3961	35.1158		21.88	29.3187	35.1469	35.122	34.4528	34.2581	21.88	31.7163	35.1033	36.0907	35.3276	34.7535	21.88	31.7163	35.1033	36.1835	35.7377	35.4956	34.8348	21.88	31.7163	35.1033	36.1835	35.5328	34.6784	35.5825	35.0596	21.88	32.4657
21.92	34.5719	35.626	35.626	35.4831	34.9847	21.92	33.975	36.5474	36.9839	36.1835	36.0165	35.7563	21.92	33.975	36.5474	36.9839	36.0969	35.4085	35.0721		21.92	29.2924	35.1158	35.1033	34.4528	34.1827	21.92	31.7034	35.1532	36.1649	35.2466	34.766	21.92	31.7034	35.1532	36.2143	35.7067	35.508	34.8848	21.92	31.7034	35.1532	36.2143	35.5515	34.6721	35.6074	35.0471	21.92	32.4977
21.96	34.5907	35.6384	35.626	35.4893	34.9785	21.96	33.9498	36.5351	37.0269	36.202	36.0413	35.7563	21.96	33.9498	36.5351	37.0269	36.1896	35.4147	35.0159		21.96	29.2793	35.1719	35.1033	34.4779	34.1135	21.96	31.5941	35.1594	36.1773	35.2217	34.7097	21.96	31.5941	35.1594	36.1649	35.7191	35.4707	34.8848	21.96	31.5941	35.1594	36.1649	35.5515	34.6846	35.6074	35.0097	21.96	32.4721
22	34.5594	35.6819	35.6943	35.508	34.9785	22	33.975	36.5228	37.0514	36.1958	36.0413	35.7749	22	33.975	36.5228	37.0514	36.2267	35.4645	35.122		22	29.3319	35.1906	35.0721	34.5155	34.1135	22	31.5812	35.122	36.2143	35.3152	34.7409	22	31.5812	35.122	36.1217	35.7501	35.5266	34.8723	22	31.5812	35.122	36.1217	35.452	34.7159	35.5825	34.941	22	32.5359
22.04	34.5969	35.6757	35.6757	35.5204	34.966	22.04	33.8616	36.5166	36.9901	36.1896	36.0722	35.7811	22.04	33.8616	36.5166	36.9901	36.1835	35.4893	35.1532		22.04	29.2924	35.2342	35.203	34.5029	34.1513	22.04	31.6262	35.1158	36.1649	35.3089	34.7347	22.04	31.6262	35.1158	36.134	35.7439	35.5825	34.891	22.04	31.6262	35.1158	36.134	35.5018	34.7722	35.5515	35.0159	22.04	32.4849
22.08	34.5844	35.6881	35.7377	35.5142	35.0159	22.08	33.8994	36.5351	36.9717	36.1464	36.1217	35.8617	22.08	33.8994	36.5351	36.9717	36.1587	35.4334	35.1968		22.08	29.2464	35.1781	35.1781	34.5155	34.1135	22.08	31.5619	35.1345	36.1896	35.3525	34.7159	22.08	31.5619	35.1345	36.202	35.7067	35.5888	34.841	22.08	31.5619	35.1345	36.202	35.5266	34.7222	35.5391	35.0908	22.08	32.5551
22.12	34.6095	35.7935	35.7501	35.5577	35.0097	22.12	33.8994	36.5166	37.0391	36.2143	36.0598	35.8679	22.12	33.8994	36.5166	37.0391	36.1835	35.4334	35.2155		22.12	29.3516	35.1843	35.1158	34.4841	34.1198	22.12	31.6777	35.122	36.1587	35.4023	34.6784	22.12	31.6777	35.122	36.202	35.6508	35.6074	34.8973	22.12	31.6777	35.122	36.202	35.5391	34.7159	35.5888	35.0783	22.12	32.5423
22.16	34.5907	35.7687	35.7067	35.5639	35.0471	22.16	33.9435	36.4118	37.0575	36.2699	36.1464	35.8369	22.16	33.9435	36.4118	37.0575	36.2699	35.4769	35.2093		22.16	29.4172	35.1656	35.203	34.528	34.1513	22.16	31.652	35.203	36.2329	35.3961	34.766	22.16	31.652	35.203	36.2576	35.7501	35.6446	35.0222	22.16	31.652	35.203	36.2576	35.5204	34.7409	35.7377	35.1781	22.16	32.5551
22.2	34.4904	35.7253	35.7811	35.4893	35.0534	22.2	33.9687	36.3995	37.0943	36.2205	36.1031	35.8617	22.2	33.9687	36.3995	37.0943	36.2267	35.4645	35.1781		22.2	29.3056	35.1719	35.2342	34.5092	34.145	22.2	31.6584	35.1843	36.2082	35.3961	34.6095	22.2	31.6584	35.1843	36.1896	35.7439	35.6322	34.9722	22.2	31.6584	35.1843	36.1896	35.4831	34.7222	35.6943	35.2093	22.2	32.5296
22.24	34.5343	35.7625	35.8245	35.4707	35.0659	22.24	33.9813	36.4427	37.1066	36.2638	36.1402	35.8431	22.24	33.9813	36.4427	37.1066	36.2699	35.4893	35.1906		22.24	29.4238	35.1906	35.2342	34.5343	34.1953	22.24	31.652	35.1906	36.1835	35.3836	34.7597	22.24	31.652	35.1906	36.1835	35.7687	35.6136	35.0284	22.24	31.652	35.1906	36.1835	35.5453	34.7535	35.6695	35.1532	22.24	32.5168
22.28	34.6784	35.7501	35.7873	35.5266	35.0222	22.28	34.0128	36.5351	37.1434	36.3255	36.1649	35.8803	22.28	34.0128	36.5351	37.1434	36.2329	35.5204	35.2155		22.28	29.3581	35.1906	35.228	34.5594	34.1198	22.28	31.7227	35.1906	36.1835	35.452	34.766	22.28	31.7227	35.1906	36.307	35.7377	35.6074	34.9785	22.28	31.7227	35.1906	36.307	35.5888	34.7409	35.626	35.1469	22.28	32.5423
22.32	34.6408	35.7749	35.8679	35.508	35.0659	22.32	34.0065	36.5597	36.9717	36.3008	36.1896	35.8741	22.32	34.0065	36.5597	36.9717	36.2761	35.4272	35.2155		22.32	29.3056	35.2155	35.2342	34.528	34.1324	22.32	31.7805	35.1719	36.2329	35.452	34.7597	22.32	31.7805	35.1719	36.2514	35.7687	35.6446	34.941	22.32	31.7805	35.1719	36.2514	35.6322	34.8223	35.7315	35.1407	22.32	32.5487
22.36	34.6032	35.7315	35.8493	35.4893	35.0846	22.36	33.9435	36.529	37.0146	36.3748	36.1896	35.8803	22.36	33.9435	36.529	37.0146	36.1896	35.4396	35.2093		22.36	29.2793	35.1719	35.2591	34.5092	34.0821	22.36	31.6713	35.2466	36.2267	35.4707	34.766	22.36	31.6713	35.2466	36.2391	35.7935	35.6695	34.916	22.36	31.6713	35.2466	36.2391	35.7315	34.8348	35.5825	35.1719	22.36	32.5551
22.4	34.6533	35.8431	35.8245	35.5639	35.0783	22.4	34.0128	36.4981	37.0759	36.3563	36.2267	35.8679	22.4	34.0128	36.4981	37.0759	36.2143	35.452	35.2778		22.4	29.2793	35.1719	35.2466	34.5719	34.1387	22.4	31.6777	35.2342	36.2267	35.4458	34.7722	22.4	31.6777	35.2342	36.1958	35.8493	35.6012	34.9035	22.4	31.6777	35.2342	36.1958	35.7067	34.866	35.6322	35.2217	22.4	32.5168
22.44	34.766	35.8865	35.8245	35.6136	35.1407	22.44	34.0065	36.6152	37.0882	36.4365	36.1958	35.8555	22.44	34.0065	36.6152	37.0882	36.2823	35.508	35.2529		22.44	29.253	35.2591	35.228	34.5531	34.1198	22.44	31.5941	35.2653	36.2205	35.4831	34.7535	22.44	31.5941	35.2653	36.1526	35.8307	35.6508	34.9098	22.44	31.5941	35.2653	36.1526	35.6633	34.8535	35.6633	35.2342	22.44	32.5423
22.48	34.7972	35.8431	35.8555	35.6571	35.2155	22.48	34.0254	36.7013	37.0637	36.418	36.2143	35.9051	22.48	34.0254	36.7013	37.0637	36.3008	35.5204	35.2653		22.48	29.3319	35.284	35.2591	34.4967	34.0821	22.48	31.7098	35.203	36.2143	35.4707	34.7785	22.48	31.7098	35.203	36.1896	35.8245	35.5888	34.8785	22.48	31.7098	35.203	36.1896	35.6819	34.8348	35.6757	35.2404	22.48	32.5997
22.52	34.6157	35.8245	35.8245	35.5825	35.1469	22.52	34.0758	36.689	37.0943	36.3933	36.2391	35.8803	22.52	34.0758	36.689	37.0943	36.2638	35.5577	35.2591		22.52	29.3384	35.2217	35.2342	34.6784	34.0443	22.52	31.6777	35.2155	36.2205	35.4707	34.7472	22.52	31.6777	35.2155	36.1896	35.7997	35.6384	34.991	22.52	31.6777	35.2155	36.1896	35.6322	34.8098	35.6881	35.2778	22.52	32.6061
22.56	34.5719	35.8245	35.8431	35.595	35.0783	22.56	34.0317	36.7259	37.0943	36.3502	36.2514	35.9175	22.56	34.0317	36.7259	37.0943	36.2638	35.595	35.2404		22.56	29.3516	35.2591	35.2466	34.6283	34.1387	22.56	31.6841	35.1781	36.2638	35.4893	34.7284	22.56	31.6841	35.1781	36.1711	35.8121	35.6446	34.9285	22.56	31.6841	35.1781	36.1711	35.626	34.8223	35.7067	35.2716	22.56	32.6125
22.6	34.5343	35.8121	35.8431	35.6508	35.097	22.6	34.1072	36.6398	37.0821	36.4118	36.2699	35.9298	22.6	34.1072	36.6398	37.0821	36.2761	35.6074	35.2466		22.6	29.345	35.2404	35.3338	34.6784	34.1701	22.6	31.7612	35.1469	36.344	35.508	34.7847	22.6	31.7612	35.1469	36.2205	35.7873	35.6881	34.9535	22.6	31.7612	35.1469	36.2205	35.8307	34.8035	35.6881	35.2342	22.6	32.6125
22.64	34.6095	35.8059	35.7935	35.6943	35.1656	22.64	34.0254	36.7505	37.0943	36.4057	36.2329	35.9484	22.64	34.0254	36.7505	37.0943	36.3316	35.6012	35.2591		22.64	29.3581	35.2155	35.284	34.6596	34.2204	22.64	31.7098	35.2155	36.2823	35.5763	34.791	22.64	31.7098	35.2155	36.2699	35.8121	35.6695	35.0034	22.64	31.7098	35.2155	36.2699	35.7749	34.866	35.7253	35.2466	22.64	32.5742
22.72	34.622	35.8307	35.7811	35.6881	35.1532	22.72	34.1009	36.7813	37.0759	36.4797	36.2638	35.9546	22.72	34.1009	36.7813	37.0759	36.3378	35.6136	35.2902		22.72	29.2859	35.0908	35.2778	34.6784	34.2141	22.72	31.7355	35.2529	36.3687	35.5328	34.8035	22.72	31.7355	35.2529	36.2452	35.8865	35.7191	35.0034	22.72	31.7355	35.2529	36.2452	35.7687	34.8098	35.7625	35.3152	22.72	32.5232
22.76	34.6283	35.8431	35.8369	35.6695	35.1469	22.76	34.1576	36.7628	37.1188	36.5166	36.2638	35.9484	22.76	34.1576	36.7628	37.1188	36.307	35.595	35.2653		22.76	29.4172	35.1781	35.2591	34.6471	34.2079	22.76	31.8126	35.2902	36.3625	35.5515	34.8348	22.76	31.8126	35.2902	36.2638	35.9113	35.8121	34.9722	22.76	31.8126	35.2902	36.2638	35.6881	34.9472	35.7935	35.2965	22.76	32.5104
22.8	34.6533	35.8927	35.8245	35.6322	35.2591	22.8	34.1638	36.7628	37.0453	36.5228	36.2267	35.9546	22.8	34.1638	36.7628	37.0453	36.3255	35.5701	35.2404		22.8	29.3516	35.2716	35.2716	34.7159	34.233	22.8	31.8961	35.2653	36.3625	35.5391	34.8098	22.8	31.8961	35.2653	36.2884	35.9051	35.8059	35.0846	22.8	31.8961	35.2653	36.2884	35.7191	34.8723	35.7935	35.3836	22.8	32.5359
22.84	34.7222	35.8803	35.9856	35.8059	35.2404	22.84	34.0128	36.7567	37.1311	36.5597	36.2452	35.9422	22.84	34.0128	36.7567	37.1311	36.3316	35.6136	35.3089		22.84	29.2662	35.2778	35.2591	34.6596	34.2519	22.84	31.8961	35.3463	36.3872	35.5142	34.7347	22.84	31.8961	35.3463	36.2638	35.8803	35.8059	35.1033	22.84	31.8961	35.3463	36.2638	35.7191	34.8535	35.8679	35.3525	22.84	32.5933
22.88	34.6721	35.8865	36.0103	35.7687	35.2404	22.88	34.0506	36.7813	37.1311	36.4118	36.2638	35.9546	22.88	34.0506	36.7813	37.1311	36.3502	35.595	35.3463		22.88	29.3713	35.2716	35.2716	34.7347	34.1764	22.88	31.7998	35.2902	36.3625	35.5328	34.7972	22.88	31.7998	35.2902	36.3995	35.8927	35.8183	35.0846	22.88	31.7998	35.2902	36.3995	35.8493	34.8098	35.8183	35.3089	22.88	32.6698
22.92	34.7597	35.9794	35.9546	35.6881	35.1656	22.92	34.0191	36.8243	37.174	36.4427	36.2267	35.967	22.92	34.0191	36.8243	37.174	36.3193	35.5763	35.284		22.92	29.3253	35.1906	35.2716	34.6596	34.1953	22.92	31.7677	35.2653	36.2946	35.5266	34.8348	22.92	31.7677	35.2653	36.3563	35.9298	35.7873	35.0721	22.92	31.7677	35.2653	36.3563	35.7439	34.8598	35.7873	35.3027	22.92	32.6635
22.96	34.7409	35.967	35.9546	35.7129	35.122	22.96	34.0317	36.8611	37.1556	36.4427	36.2391	35.967	22.96	34.0317	36.8611	37.1556	36.3008	35.5577	35.3027		22.96	29.3516	35.2466	35.2902	34.6721	34.3084	22.96	31.7869	35.284	36.3131	35.5328	34.791	22.96	31.7869	35.284	36.3502	35.8927	35.7811	35.1158	22.96	31.7869	35.284	36.3502	35.8555	34.9223	35.7563	35.4085	22.96	32.6444
23	34.6345	35.967	35.9298	35.6384	35.1407	23	34.0632	36.8489	37.1372	36.4365	36.2391	35.9608	23	34.0632	36.8489	37.1372	36.381	35.5888	35.3338		23	29.3384	35.3152	35.3027	34.622	34.2896	23	31.7741	35.2591	36.3255	35.595	34.8473	23	31.7741	35.2591	36.2884	36.0041	35.7811	35.1033	23	31.7741	35.2591	36.2884	35.6819	34.941	35.8307	35.3463	23	32.7144
23.04	34.7097	36.0413	35.936	35.7377	35.1968	23.04	34.1513	36.8058	37.1617	36.4488	36.2946	35.9546	23.04	34.1513	36.8058	37.1617	36.344	35.6757	35.2529		23.04	29.3056	35.284	35.3587	34.6971	34.3335	23.04	31.8383	35.2466	36.3316	35.4956	34.8348	23.04	31.8383	35.2466	36.3193	35.8865	35.8431	35.0534	23.04	31.8383	35.2466	36.3193	35.7935	34.9722	35.8865	35.4396	23.04	32.6444
23.08	34.8098	35.9794	35.936	35.8121	35.2965	23.08	34.2644	36.7505	37.1924	36.418	36.3872	35.9979	23.08	34.2644	36.7505	37.1924	36.3131	35.6508	35.3463		23.08	29.253	35.284	35.34	34.6846	34.3335	23.08	31.8447	35.284	36.3378	35.6012	34.866	23.08	31.8447	35.284	36.344	35.9175	35.8679	35.0659	23.08	31.8447	35.284	36.344	35.7687	34.9847	35.9051	35.4085	23.08	32.6953
23.12	34.7722	35.9856	36.0103	35.7563	35.2653	23.12	34.1513	36.7751	37.1924	36.5905	36.3255	35.9917	23.12	34.1513	36.7751	37.1924	36.3316	35.6757	35.3961		23.12	29.2333	35.3836	35.34	34.6846	34.2456	23.12	31.7805	35.2653	36.3502	35.595	34.8848	23.12	31.7805	35.2653	36.3625	35.8679	35.8927	35.0908	23.12	31.7805	35.2653	36.3625	35.7563	34.9098	35.8865	35.4272	23.12	32.6635
23.16	34.6596	35.9236	35.9732	35.7811	35.2716	23.16	34.1009	36.8673	37.2046	36.3872	36.4242	35.9732	23.16	34.1009	36.8673	37.2046	36.3563	35.6322	35.3463		23.16	29.3319	35.3587	35.4272	34.7284	34.3524	23.16	31.7227	35.3214	36.3748	35.6012	34.9285	23.16	31.7227	35.3214	36.4735	35.8803	35.9236	35.1843	23.16	31.7227	35.3214	36.4735	35.7997	34.9785	35.8927	35.452	23.16	32.6125
23.2	34.7347	35.8803	36.0041	35.7563	35.2778	23.2	34.1198	36.8857	37.223	36.4488	36.344	36.0165	23.2	34.1198	36.8857	37.223	36.3563	35.6571	35.5018		23.2	29.3975	35.34	35.4334	34.7409	34.2958	23.2	31.8126	35.3027	36.4673	35.7129	34.966	23.2	31.8126	35.3027	36.4858	35.8865	35.8679	35.1906	23.2	31.8126	35.3027	36.4858	35.8121	35.0409	35.8927	35.4707	23.2	32.6316
23.24	34.7722	35.8927	36.0351	35.8121	35.2778	23.24	34.145	36.8489	37.2659	36.4303	36.3563	36.0227	23.24	34.145	36.8489	37.2659	36.3625	35.7191	35.452		23.24	29.3581	35.3276	35.4831	34.7597	34.2581	23.24	31.8126	35.3152	36.4488	35.6633	34.916	23.24	31.8126	35.3152	36.455	35.9546	35.8865	35.1781	23.24	31.8126	35.3152	36.455	35.9917	34.9847	35.9175	35.4334	23.24	32.6252
23.28	34.7034	35.8741	36.0598	35.8307	35.2965	23.28	34.1701	36.7075	37.2108	36.4427	36.2823	35.9917	23.28	34.1701	36.7075	37.2108	36.4365	35.7377	35.4147		23.28	29.3647	35.3152	35.5142	34.7535	34.2896	23.28	31.7548	35.2902	36.4242	35.7129	34.9348	23.28	31.7548	35.2902	36.4427	35.9856	35.9175	35.1407	23.28	31.7548	35.2902	36.4427	35.8679	34.9847	35.9236	35.4893	23.28	32.6189
23.32	34.7785	35.8245	36.0041	35.8307	35.3214	23.32	34.1701	36.7198	37.2169	36.4057	36.3378	35.9856	23.32	34.1701	36.7198	37.2169	36.4057	35.6757	35.3774		23.32	29.3713	35.2965	35.4458	34.7972	34.2896	23.32	31.8897	35.3525	36.4242	35.7191	34.9285	23.32	31.8897	35.3525	36.4673	35.9546	35.9732	35.2093	23.32	31.8897	35.3525	36.4673	35.8865	35.0159	36.0165	35.3774	23.32	32.6252
23.36	34.8223	35.8803	36.0289	35.8617	35.3338	23.36	34.0884	36.7935	37.272	36.4981	36.381	36.0907	23.36	34.0884	36.7935	37.272	36.4057	35.7501	35.4272		23.36	29.3581	35.3649	35.4396	34.841	34.3335	23.36	31.8832	35.3338	36.4118	35.7191	35.0409	23.36	31.8832	35.3338	36.4735	35.967	35.9546	35.2342	23.36	31.8832	35.3338	36.4735	35.8927	34.9847	35.9856	35.4023	23.36	32.6252
23.4	34.7472	35.9175	36.0289	35.8183	35.3027	23.4	34.0569	36.8489	37.3026	36.5166	36.4797	36.1217	23.4	34.0569	36.8489	37.3026	36.4797	35.8555	35.4396		23.4	29.3778	35.3649	35.4272	34.8348	34.39	23.4	31.9089	35.4645	36.4797	35.6943	35.0284	23.4	31.9089	35.4645	36.4488	35.9856	35.9608	35.1843	23.4	31.9089	35.4645	36.4488	35.9484	35.0159	35.9546	35.4893	23.4	32.6316
23.44	34.8723	35.9298	36.0845	35.7749	35.3214	23.44	34.1701	36.8427	37.3148	36.5043	36.4612	36.1093	23.44	34.1701	36.8427	37.3148	36.4797	35.8307	35.4707		23.44	29.3713	35.3836	35.3649	34.8035	34.3147	23.44	31.8832	35.5453	36.418	35.6757	35.0159	23.44	31.8832	35.5453	36.4488	36.0351	35.9608	35.2093	23.44	31.8832	35.5453	36.4488	35.9732	34.9722	35.9608	35.5577	23.44	32.638
23.48	34.8848	35.9732	36.0598	35.7439	35.2778	23.48	34.2204	36.855	37.3209	36.5413	36.4242	36.134	23.48	34.2204	36.855	37.3209	36.4735	35.7811	35.4396		23.48	29.3778	35.5018	35.4147	34.7972	34.39	23.48	31.8768	35.4645	36.4981	35.7377	34.966	23.48	31.8768	35.4645	36.492	36.0722	35.9236	35.228	23.48	31.8768	35.4645	36.492	35.9484	35.0721	35.9917	35.5639	23.48	32.7272
23.56	34.816	35.9979	36.0722	35.7625	35.2653	23.56	34.145	36.8304	37.223	36.689	36.3995	36.1896	23.56	34.145	36.8304	37.223	36.5166	35.7811	35.626		23.56	29.3975	35.452	35.4645	34.7972	34.4026	23.56	31.8319	35.4334	36.4797	35.7563	35.0222	23.56	31.8319	35.4334	36.5905	36.0845	35.9113	35.3214	23.56	31.8319	35.4334	36.5905	35.9422	35.0721	36.0165	35.5142	23.56	32.7654
23.6	34.8598	35.9917	36.0969	35.8121	35.3027	23.6	34.189	36.7874	37.2903	36.7444	36.4118	36.1402	23.6	34.189	36.7874	37.2903	36.492	35.8059	35.508		23.6	29.3713	35.4147	35.4956	34.8535	34.3461	23.6	31.819	35.4334	36.5721	35.7501	35.0471	23.6	31.819	35.4334	36.6275	36.1402	35.9236	35.2466	23.6	31.819	35.4334	36.6275	35.9484	35.0034	36.0536	35.5266	23.6	32.7845
23.64	34.7409	36.0041	36.1093	35.8617	35.3338	23.64	34.1764	36.8611	37.2597	36.6459	36.4488	36.1526	23.64	34.1764	36.8611	37.2597	36.492	35.8617	35.5453		23.64	29.3384	35.4147	35.4396	34.8035	34.3649	23.64	31.7998	35.3338	36.5844	35.7191	35.0596	23.64	31.7998	35.3338	36.6029	36.0784	35.9298	35.2404	23.64	31.7998	35.3338	36.6029	35.9113	35.0159	36.1093	35.5577	23.64	32.7781
23.68	34.7472	35.9856	36.066	35.8679	35.3649	23.68	34.3524	36.8304	37.3332	36.6398	36.4673	36.2391	23.68	34.3524	36.8304	37.3332	36.4488	35.8059	35.5515		23.68	29.3121	35.4334	35.4645	34.7597	34.3398	23.68	31.8447	35.3214	36.4797	35.7005	35.0534	23.68	31.8447	35.3214	36.5228	36.0227	35.9732	35.284	23.68	31.8447	35.3214	36.5228	35.9298	35.0034	35.9917	35.5266	23.68	32.8036
23.72	34.7347	36.0474	36.0722	35.8741	35.4147	23.72	34.2896	36.8427	37.2903	36.5721	36.4612	36.2143	23.72	34.2896	36.8427	37.2903	36.5413	35.8121	35.595		23.72	29.2136	35.4334	35.5142	34.8973	34.3963	23.72	31.8319	35.3712	36.4735	35.7315	35.0721	23.72	31.8319	35.3712	36.5105	36.0845	36.0041	35.2217	23.72	31.8319	35.3712	36.5105	35.9298	34.991	36.0474	35.4956	23.72	32.7208
23.76	34.7222	36.0413	36.1278	35.8865	35.3712	23.76	34.321	36.9103	37.2659	36.5967	36.4673	36.2329	23.76	34.321	36.9103	37.2659	36.5228	35.8369	35.7191		23.76	29.2727	35.3898	35.5204	34.8348	34.39	23.76	31.8319	35.3961	36.4735	35.7873	35.1532	23.76	31.8319	35.3961	36.418	36.0845	35.9608	35.2591	23.76	31.8319	35.3961	36.418	36.0103	34.9847	36.0227	35.4458	23.76	32.6571
23.8	34.7785	36.0289	36.1587	35.8865	35.3587	23.8	34.3147	36.9287	37.3209	36.6213	36.4303	36.2205	23.8	34.3147	36.9287	37.3209	36.5536	35.8741	35.626		23.8	29.2727	35.4209	35.5453	34.8285	34.3461	23.8	31.864	35.3525	36.4797	35.7811	35.1282	23.8	31.864	35.3525	36.4427	36.0413	35.9794	35.2902	23.8	31.864	35.3525	36.4427	36.0351	35.0534	36.0103	35.4396	23.8	32.6826
23.84	34.7597	36.0227	36.1773	35.8927	35.3525	23.84	34.3272	36.8857	37.3515	36.5905	36.4427	36.2638	23.84	34.3272	36.8857	37.3515	36.5536	35.8741	35.6012		23.84	29.4435	35.3525	35.5391	34.8035	34.3649	23.84	31.9474	35.3712	36.4981	35.7873	35.1345	23.84	31.9474	35.3712	36.455	36.0722	36.0474	35.2591	23.84	31.9474	35.3712	36.455	36.0289	35.0534	36.066	35.4396	23.84	32.7399
23.88	34.7535	36.066	36.1773	36.0289	35.3712	23.88	34.2644	36.941	37.3699	36.609	36.5043	36.2391	23.88	34.2644	36.941	37.3699	36.5905	35.8679	35.7067		23.88	29.3647	35.3836	35.5701	34.8098	34.3335	23.88	31.9089	35.3774	36.609	35.7439	35.0846	23.88	31.9089	35.3774	36.5043	36.1526	36.066	35.3152	23.88	31.9089	35.3774	36.5043	36.0227	35.0409	36.1217	35.4272	23.88	32.7399
23.92	34.7722	36.1031	36.2267	35.9608	35.4085	23.92	34.1638	36.9471	37.3638	36.5782	36.5659	36.2823	23.92	34.1638	36.9471	37.3638	36.5659	35.8617	35.626		23.92	29.3581	35.4209	35.5453	34.8348	34.3524	23.92	31.8832	35.3774	36.5228	35.7563	35.1095	23.92	31.8832	35.3774	36.5105	36.0598	36.0536	35.3276	23.92	31.8832	35.3774	36.5105	36.0907	35.0596	36.1464	35.4209	23.92	32.7399
23.96	34.8348	36.1835	36.3008	35.9608	35.3089	23.96	34.2456	36.9532	37.3393	36.6213	36.5905	36.2329	23.96	34.2456	36.9532	37.3393	36.5844	35.8617	35.6322		23.96	29.3516	35.4147	35.5453	34.8598	34.3398	23.96	31.8768	35.4334	36.5413	35.6819	35.1532	23.96	31.8768	35.4334	36.5351	36.0598	36.1155	35.3152	23.96	31.8768	35.4334	36.5351	36.0041	35.0159	36.0598	35.4085	23.96	32.7845
24	34.8848	36.1835	36.2699	35.9732	35.34	24	34.2141	36.9901	37.3209	36.6644	36.6398	36.2638	24	34.2141	36.9901	37.3209	36.5413	35.8927	35.6943		24	29.3778	35.3898	35.5204	34.8535	34.3461	24	31.8512	35.4272	36.5597	35.6943	35.122	24	31.8512	35.4272	36.5721	36.1587	36.066	35.284	24	31.8512	35.4272	36.5721	35.9917	35.0783	36.0907	35.5888	24	32.7909
24.04	34.9223	36.1278	36.2452	35.9546	35.3152	24.04	34.2141	37.0023	37.3638	36.6582	36.6459	36.2946	24.04	34.2141	37.0023	37.3638	36.5474	35.9051	35.5577		24.04	29.4172	35.4396	35.5391	34.8535	34.3524	24.04	31.8255	35.4334	36.5905	35.7377	35.1095	24.04	31.8255	35.4334	36.5782	36.1278	35.9979	35.3463	24.04	31.8255	35.4334	36.5782	35.9732	35.0534	36.0536	35.5763	24.04	32.7336
24.08	34.841	36.1711	36.3008	35.936	35.3898	24.08	34.2644	36.9778	37.3515	36.7382	36.7136	36.2823	24.08	34.2644	36.9778	37.3515	36.6029	35.9175	35.626		24.08	29.4106	35.452	35.5515	34.941	34.4214	24.08	31.8512	35.4209	36.6213	35.8803	35.097	24.08	31.8512	35.4209	36.609	36.1217	36.1464	35.3649	24.08	31.8512	35.4209	36.609	35.9917	35.1158	36.0474	35.5701	24.08	32.7336
24.12	34.7597	36.1896	36.3378	36.0041	35.4893	24.12	34.3335	36.9348	37.431	36.7198	36.6767	36.3378	24.12	34.3335	36.9348	37.431	36.5844	35.8865	35.7067		24.12	29.391	35.4272	35.5763	34.9285	34.4716	24.12	31.8319	35.452	36.609	35.8493	35.1095	24.12	31.8319	35.452	36.6029	36.1649	36.1587	35.3774	24.12	31.8319	35.452	36.6029	36.0536	35.1095	36.066	35.5639	24.12	32.7399
24.16	34.7847	36.1464	36.3502	36.0165	35.4893	24.16	34.277	36.9839	37.3821	36.7444	36.689	36.3316	24.16	34.277	36.9839	37.3821	36.6275	35.9113	35.7501		24.16	29.4172	35.4583	35.6012	34.8973	34.4528	24.16	31.819	35.4831	36.5659	35.8617	35.1656	24.16	31.819	35.4831	36.5844	36.307	36.1711	35.4023	24.16	31.819	35.4831	36.5844	36.0598	35.122	36.0351	35.5204	24.16	32.7463
24.2	34.7472	36.1773	36.3316	36.0165	35.2716	24.2	34.2079	37.0146	37.3638	36.7198	36.7075	36.3131	24.2	34.2079	37.0146	37.3638	36.6952	35.9298	35.7191		24.2	29.4106	35.4583	35.626	34.9285	34.4904	24.2	31.8447	35.452	36.5844	35.8369	35.1407	24.2	31.8447	35.452	36.6336	36.2761	36.134	35.4147	24.2	31.8447	35.452	36.6336	36.0103	35.1469	36.0536	35.5763	24.2	32.689
24.24	34.7597	36.1402	36.3563	36.066	35.3774	24.24	34.3084	36.8366	37.4371	36.7013	36.6829	36.3193	24.24	34.3084	36.8366	37.4371	36.5967	35.8989	35.7315		24.24	29.3975	35.4893	35.6508	34.9285	34.5155	24.24	31.8897	35.4272	36.609	35.8307	35.284	24.24	31.8897	35.4272	36.6152	36.2576	36.1217	35.4272	24.24	31.8897	35.4272	36.6152	36.1464	35.1781	36.1217	35.5515	24.24	32.7463
24.28	34.8035	36.1587	36.3378	36.0474	35.5018	24.28	34.3147	36.9103	37.431	36.7259	36.6398	36.3625	24.28	34.3147	36.9103	37.431	36.5597	35.9175	35.7067		24.28	29.4106	35.452	35.6446	34.9035	34.5155	24.28	31.8961	35.5204	36.5597	35.8059	35.203	24.28	31.8961	35.5204	36.5844	36.2514	36.0969	35.4645	24.28	31.8961	35.5204	36.5844	36.0722	35.1719	36.1278	35.5328	24.28	32.6826
24.32	34.8535	36.2143	36.3378	36.0351	35.5577	24.32	34.145	36.8427	37.4555	36.7997	36.6459	36.344	24.32	34.145	36.8427	37.4555	36.5659	35.9422	35.7625		24.32	29.3713	35.4147	35.6384	35.0097	34.5092	24.32	31.8126	35.5142	36.5905	35.8803	35.1033	24.32	31.8126	35.5142	36.5905	36.3625	36.1278	35.4458	24.32	31.8126	35.5142	36.5905	36.1217	35.1968	36.1464	35.4956	24.32	32.7781
24.4	34.841	36.1896	36.3255	35.967	35.4769	24.4	34.3963	36.9962	37.4616	36.8304	36.6582	36.3378	24.4	34.3963	36.9962	37.4616	36.6582	35.9546	35.7687		24.4	29.3516	35.4831	35.6571	35.0534	34.5092	24.4	31.8512	35.5142	36.6829	35.9236	35.1158	24.4	31.8512	35.5142	36.5905	36.3378	36.1402	35.452	24.4	31.8512	35.5142	36.5905	36.066	35.1781	36.1217	35.5763	24.4	32.8227
24.44	34.966	36.1958	36.3193	35.9979	35.4147	24.44	34.2896	36.9962	37.4371	36.7997	36.6829	36.418	24.44	34.2896	36.9962	37.4371	36.6336	35.9608	35.7749		24.44	29.2859	35.5391	35.6508	34.9785	34.4904	24.44	31.8576	35.4769	36.6213	35.8617	35.2155	24.44	31.8576	35.4769	36.609	36.3131	36.1464	35.4147	24.44	31.8576	35.4769	36.609	36.0598	35.1282	36.134	35.6508	24.44	32.8036
24.48	34.9597	36.1773	36.3378	36.066	35.452	24.48	34.3147	37.0759	37.4494	36.8489	36.7198	36.4242	24.48	34.3147	37.0759	37.4494	36.6398	36.0041	35.7749		24.48	29.4369	35.5018	35.6384	35.0034	34.5531	24.48	31.8512	35.4458	36.6398	35.8927	35.2155	24.48	31.8512	35.4458	36.6706	36.2205	36.1526	35.4023	24.48	31.8512	35.4458	36.6706	36.0845	35.1158	36.2267	35.6322	24.48	32.759
24.52	34.9722	36.1773	36.3995	36.1155	35.6012	24.52	34.2833	37.0821	37.4555	36.8673	36.7567	36.4303	24.52	34.2833	37.0821	37.4555	36.6213	36.0289	35.7563		24.52	29.4697	35.4769	35.6446	34.9597	34.5531	24.52	31.9025	35.4583	36.6398	35.9484	35.2093	24.52	31.9025	35.4583	36.7013	36.307	36.2143	35.3836	24.52	31.9025	35.4583	36.7013	36.1402	35.122	36.1835	35.6571	24.52	32.7399
24.56	34.9035	36.1958	36.3502	36.1217	35.5639	24.56	34.3398	37.1188	37.4677	36.8611	36.7813	36.4242	24.56	34.3398	37.1188	37.4677	36.6582	35.9608	35.7377		24.56	29.4566	35.4769	35.6571	34.941	34.5656	24.56	31.9346	35.4769	36.6582	35.9484	35.2217	24.56	31.9346	35.4769	36.7075	36.3008	36.2082	35.4396	24.56	31.9346	35.4769	36.7075	36.1217	35.2093	36.2143	35.626	24.56	32.6635
24.6	34.941	36.2143	36.3625	36.1711	35.5577	24.6	34.3335	37.0943	37.4555	36.7628	36.7444	36.4365	24.6	34.3335	37.0943	37.4555	36.7321	35.9546	35.7625		24.6	29.4435	35.4085	35.6446	34.9847	34.6471	24.6	31.9602	35.4583	36.6152	35.9298	35.2093	24.6	31.9602	35.4583	36.7136	36.2452	36.1835	35.34	24.6	31.9602	35.4583	36.7136	36.1773	35.2217	36.2699	35.7191	24.6	32.7208
24.64	34.9035	36.1835	36.3378	36.1711	35.5142	24.64	34.2644	37.0637	37.4799	36.7136	36.7321	36.4858	24.64	34.2644	37.0637	37.4799	36.6952	35.9856	35.9113		24.64	29.3975	35.4209	35.6943	34.9972	34.6157	24.64	31.9731	35.4458	36.5967	35.9794	35.2591	24.64	31.9731	35.4458	36.7382	36.2514	36.1711	35.4023	24.64	31.9731	35.4458	36.7382	36.1835	35.284	36.2329	35.7439	24.64	32.7972
24.68	34.941	36.2143	36.3563	36.1526	35.5639	24.68	34.2581	37.0698	37.4616	36.7751	36.7628	36.5413	24.68	34.2581	37.0698	37.4616	36.7874	36.0289	35.8741		24.68	29.4172	35.4583	35.7067	35.0659	34.622	24.68	31.941	35.4458	36.6829	36.0227	35.2778	24.68	31.941	35.4458	36.9103	36.2638	36.2205	35.4147	24.68	31.941	35.4458	36.9103	36.1649	35.2342	36.2391	35.7253	24.68	32.8291
24.72	35.0097	36.2082	36.3687	36.2267	35.5328	24.72	34.3649	37.0146	37.5349	36.9041	36.8489	36.4858	24.72	34.3649	37.0146	37.5349	36.812	36.0227	35.8679		24.72	29.5222	35.5515	35.7005	35.0721	34.6471	24.72	32.0372	35.5266	36.7505	36.0413	35.3152	24.72	32.0372	35.5266	36.7259	36.3255	36.2576	35.4458	24.72	32.0372	35.5266	36.7259	36.0784	35.2902	36.2576	35.6633	24.72	32.81
24.76	35.097	36.3687	36.3625	36.2391	35.5515	24.76	34.3712	37.0882	37.5349	36.8796	36.8243	36.492	24.76	34.3712	37.0882	37.5349	36.7935	36.0289	35.8369		24.76	29.4959	35.5701	35.7129	35.0284	34.6533	24.76	31.9859	35.5701	36.7505	36.0722	35.3089	24.76	31.9859	35.5701	36.769	36.3687	36.3563	35.4645	24.76	31.9859	35.5701	36.769	36.2514	35.3774	36.2761	35.7005	24.76	32.8291
24.8	34.9847	36.418	36.4057	36.2452	35.5639	24.8	34.4151	37.1434	37.6021	36.9348	36.8366	36.5105	24.8	34.4151	37.1434	37.6021	36.769	36.066	35.8555		24.8	29.5353	35.5577	35.7501	35.0222	34.7159	24.8	32.1076	35.5515	36.769	36.0165	35.2591	24.8	32.1076	35.5515	36.769	36.4057	36.3193	35.5391	24.8	32.1076	35.5515	36.769	36.2205	35.3774	36.3193	35.7191	24.8	32.8291
24.84	35.0659	36.3872	36.3872	36.2267	35.6571	24.84	34.4904	37.1311	37.5837	36.9962	36.812	36.4797	24.84	34.4904	37.1311	37.5837	36.8304	36.1278	35.9175		24.84	29.4959	35.5204	35.7501	35.0471	34.6971	24.84	32.1204	35.5453	36.769	36.0103	35.2965	24.84	32.1204	35.5453	36.7444	36.4057	36.3193	35.5515	24.84	32.1204	35.5453	36.7444	36.2143	35.4209	36.3255	35.6757	24.84	32.7654
24.88	35.1843	36.3872	36.3748	36.202	35.6012	24.88	34.4214	37.1495	37.6753	36.9532	36.855	36.5413	24.88	34.4214	37.1495	37.6753	36.8427	36.1587	35.8741		24.88	29.5287	35.508	35.7873	35.1843	34.6909	24.88	32.1461	35.5266	36.7997	36.0413	35.3338	24.88	32.1461	35.5266	36.8058	36.344	36.307	35.5328	24.88	32.1461	35.5266	36.8058	36.2267	35.4458	36.2946	35.7377	24.88	32.7718
24.92	35.1033	36.3502	36.3872	36.2082	35.7315	24.92	34.4402	37.125	37.657	36.9594	36.8796	36.5905	24.92	34.4402	37.125	37.657	36.8427	36.1773	35.8741		24.92	29.5025	35.5577	35.7873	35.1532	34.6533	24.92	32.0948	35.5391	36.7874	36.0969	35.3649	24.92	32.0948	35.5391	36.7444	36.3625	36.4118	35.5142	24.92	32.0948	35.5391	36.7444	36.2946	35.4085	36.2452	35.7625	24.92	32.7718
24.96	35.0284	36.344	36.4118	36.2329	35.6943	24.96	34.39	37.1556	37.6387	36.9287	36.8918	36.5782	24.96	34.39	37.1556	37.6387	36.8181	36.1711	35.8741		24.96	29.5353	35.5453	35.8493	35.1345	34.6596	24.96	32.0692	35.5577	36.7751	36.0969	35.34	24.96	32.0692	35.5577	36.7935	36.3933	36.3378	35.5888	24.96	32.0692	35.5577	36.7935	36.2514	35.4334	36.3748	35.7935	24.96	32.8672
25	34.9597	36.3193	36.4427	36.2082	35.7129	25	34.3335	37.1372	37.6204	36.8796	36.8673	36.6029	25	34.3335	37.1372	37.6204	36.8427	36.1835	35.9113		25	29.5091	35.6012	35.8245	35.1345	34.6471	25	32.0115	35.6136	36.7935	36.0598	35.3587	25	32.0115	35.6136	36.7813	36.3872	36.2884	35.595	25	32.0115	35.6136	36.7813	36.2576	35.4272	36.3687	35.8369	25	32.9372
25.04	34.966	36.3625	36.4858	36.2823	35.6819	25.04	34.4026	37.1311	37.6387	36.9103	36.8427	36.5844	25.04	34.4026	37.1311	37.6387	36.8181	36.1958	35.9236		25.04	29.5025	35.6384	35.8555	35.1719	34.6596	25.04	32.0436	35.5825	36.7874	36.0907	35.4085	25.04	32.0436	35.5825	36.7874	36.4057	36.2884	35.5515	25.04	32.0436	35.5825	36.7874	36.3316	35.3836	36.3625	35.7749	25.04	32.9308
25.08	35.0659	36.381	36.4612	36.1958	35.6757	25.08	34.3649	37.2108	37.6082	36.9226	36.9717	36.6213	25.08	34.3649	37.2108	37.6082	36.8181	36.1155	35.9484		25.08	29.6794	35.6322	35.8679	35.1282	34.622	25.08	32.0564	35.5763	36.8611	36.1464	35.4023	25.08	32.0564	35.5763	36.7935	36.4673	36.307	35.5763	25.08	32.0564	35.5763	36.7935	36.381	35.4023	36.3563	35.8059	25.08	32.9308
25.12	35.0159	36.3378	36.4612	36.2638	35.6757	25.12	34.3775	37.2291	37.5654	36.9778	36.9226	36.6213	25.12	34.3775	37.2291	37.5654	36.898	36.1217	35.9175		25.12	29.6205	35.6074	35.9236	35.1095	34.6721	25.12	32.0692	35.5888	36.8181	36.1155	35.3463	25.12	32.0692	35.5888	36.8058	36.5905	36.3687	35.6571	25.12	32.0692	35.5888	36.8058	36.307	35.3898	36.3687	35.8617	25.12	32.899
25.16	35.0284	36.344	36.4673	36.2452	35.6819	25.16	34.2958	37.2414	37.5776	37.0023	36.9164	36.7013	25.16	34.2958	37.2414	37.5776	36.8918	36.2082	35.9051		25.16	29.6598	35.6074	35.967	35.1407	34.7785	25.16	32.0564	35.6136	36.7935	36.2205	35.4023	25.16	32.0564	35.6136	36.7935	36.4981	36.3933	35.626	25.16	32.0564	35.6136	36.7935	36.3008	35.4023	36.3378	35.8865	25.16	32.8609
25.24	35.0159	36.3625	36.4488	36.2391	35.6819	25.24	34.3272	37.2291	37.5898	37.0207	36.941	36.6706	25.24	34.3272	37.2291	37.5898	36.9348	36.2082	35.9175		25.24	29.627	35.5825	35.936	35.1345	34.6596	25.24	32.114	35.6198	36.8366	36.1649	35.4023	25.24	32.114	35.6198	36.8489	36.492	36.3995	35.6571	25.24	32.114	35.6198	36.8489	36.2514	35.4458	36.3687	35.8741	25.24	32.899
25.28	34.991	36.3563	36.4858	36.2329	35.5577	25.28	34.4026	37.1985	37.6021	37.0023	36.9471	36.6582	25.28	34.4026	37.1985	37.6021	36.898	36.2205	35.9422		25.28	29.6008	35.6012	35.9422	35.1719	34.6596	25.28	32.1333	35.5204	36.8243	36.1711	35.4209	25.28	32.1333	35.5204	36.8304	36.5105	36.4242	35.6633	25.28	32.1333	35.5204	36.8304	36.307	35.4147	36.344	35.8431	25.28	32.9563
25.32	35.0347	36.4612	36.4735	36.2761	35.6757	25.32	34.4151	37.2169	37.6143	37.0759	36.9287	36.6644	25.32	34.4151	37.2169	37.6143	36.898	36.1835	36.0227		25.32	29.5877	35.6384	35.9298	35.1532	34.7097	25.32	32.05	35.6136	36.9471	36.1217	35.4023	25.32	32.05	35.6136	36.7997	36.5105	36.381	35.6446	25.32	32.05	35.6136	36.7997	36.2823	35.4645	36.3316	35.8183	25.32	32.899
25.36	35.0659	36.4488	36.4427	36.2452	35.7563	25.36	34.39	37.1862	37.657	37.0269	36.9532	36.7198	25.36	34.39	37.1862	37.657	36.9532	36.2205	36.0041		25.36	29.5681	35.6571	35.8927	35.1407	34.6909	25.36	32.082	35.6446	36.9348	36.134	35.4831	25.36	32.082	35.6446	36.8734	36.4735	36.3563	35.6695	25.36	32.082	35.6446	36.8734	36.3008	35.4209	36.2761	35.8679	25.36	32.9117
25.4	35.0471	36.4242	36.3995	36.2205	35.7997	25.4	34.3586	37.2046	37.6631	37.0882	36.941	36.7628	25.4	34.3586	37.2046	37.6631	36.9594	36.2884	35.9979		25.4	29.5681	35.6446	35.8989	35.2155	34.7472	25.4	32.1333	35.6322	36.7997	36.1402	35.4583	25.4	32.1333	35.6322	36.7997	36.5782	36.3625	35.6695	25.4	32.1333	35.6322	36.7997	36.381	35.4645	36.2699	35.8555	25.4	32.9372
25.44	35.1095	36.4365	36.3933	36.2329	35.7749	25.44	34.39	37.2108	37.6997	37.0146	36.9532	36.7382	25.44	34.39	37.2108	37.6997	36.9532	36.2946	35.9732		25.44	29.5877	35.6012	35.8989	35.1906	34.7597	25.44	32.0628	35.626	36.7935	36.1587	35.4707	25.44	32.0628	35.626	36.8181	36.5721	36.381	35.6198	25.44	32.0628	35.626	36.8181	36.4118	35.4831	36.344	35.7997	25.44	32.9944
25.48	35.1345	36.4858	36.4612	36.1835	35.8369	25.48	34.321	37.174	37.6814	37.0882	36.9717	36.7321	25.48	34.321	37.174	37.6814	36.941	36.2884	36.0103		25.48	29.5549	35.6136	35.8989	35.1532	34.7722	25.48	32.0372	35.6508	36.812	36.1896	35.5266	25.48	32.0372	35.6508	36.812	36.5413	36.3933	35.6695	25.48	32.0372	35.6508	36.812	36.4057	35.4396	36.4488	35.7873	25.48	32.9435
25.52	35.0659	36.4735	36.4612	36.2823	35.8183	25.52	34.3649	37.1495	37.6875	37.0637	36.941	36.7259	25.52	34.3649	37.1495	37.6875	36.9962	36.3193	36.0227		25.52	29.5681	35.595	35.9422	35.1968	34.7409	25.52	32.0884	35.6757	36.8181	36.1649	35.5577	25.52	32.0884	35.6757	36.8243	36.5597	36.4612	35.6695	25.52	32.0884	35.6757	36.8243	36.4612	35.3961	36.4488	35.7873	25.52	32.969
25.56	35.1407	36.4735	36.4858	36.3008	35.8307	25.56	34.4151	37.2291	37.718	37.0391	36.9287	36.7444	25.56	34.4151	37.2291	37.718	37.0391	36.3378	36.0165		25.56	29.5484	35.6757	35.8803	35.2217	34.8035	25.56	32.1333	35.7315	36.8734	36.2884	35.4831	25.56	32.1333	35.7315	36.8611	36.5782	36.3933	35.6943	25.56	32.1333	35.7315	36.8611	36.3502	35.4272	36.5043	35.8245	25.56	32.9817
25.6	35.1532	36.4118	36.5413	36.3131	35.8493	25.6	34.39	37.2659	37.7119	37.0943	36.9594	36.7813	25.6	34.39	37.2659	37.7119	37.0637	36.3563	36.0598		25.6	29.5877	35.5639	35.8121	35.2155	34.7847	25.6	32.1204	35.7563	36.9164	36.2267	35.3836	25.6	32.1204	35.7563	36.9103	36.5597	36.4612	35.6633	25.6	32.1204	35.7563	36.9103	36.455	35.4023	36.4612	35.8927	25.6	32.9245
25.64	35.1095	36.455	36.5536	36.3316	35.8369	25.64	34.4088	37.2108	37.7058	37.1679	37.1434	36.7997	25.64	34.4088	37.2108	37.7058	37.1066	36.381	35.9979		25.64	29.6663	35.6136	35.9546	35.2093	34.7597	25.64	32.0948	35.7191	37.0146	36.2143	35.3774	25.64	32.0948	35.7191	37.0146	36.5536	36.455	35.7005	25.64	32.0948	35.7191	37.0146	36.4303	35.4209	36.4673	35.8679	25.64	32.9499
25.68	35.097	36.5351	36.5721	36.4365	35.8803	25.68	34.3461	37.2414	37.7302	37.1311	37.0698	36.8058	25.68	34.3461	37.2414	37.7302	37.0882	36.3625	35.9484		25.68	29.6598	35.5825	36.0289	35.2155	34.816	25.68	32.1461	35.7377	37.0207	36.202	35.4645	25.68	32.1461	35.7377	37.0146	36.5536	36.4612	35.7439	25.68	32.1461	35.7377	37.0146	36.5228	35.452	36.492	35.9608	25.68	32.9499
25.72	35.1656	36.5166	36.7013	36.455	35.9113	25.72	34.3963	37.2046	37.7606	37.1188	37.0269	36.769	25.72	34.3963	37.2046	37.7606	37.1005	36.3872	35.9917		25.72	29.7252	35.6136	36.0103	35.1719	34.7722	25.72	32.1973	35.7501	36.9226	36.2761	35.508	25.72	32.1973	35.7501	36.9717	36.5228	36.4118	35.7625	25.72	32.1973	35.7501	36.9717	36.529	35.508	36.4797	35.9422	25.72	32.8609
25.76	35.1345	36.4981	36.6767	36.529	35.8989	25.76	34.4277	37.2414	37.7545	37.1434	37.0637	36.7321	25.76	34.4277	37.2414	37.7545	37.1617	36.4057	36.0351		25.76	29.6794	35.6508	35.9856	35.1594	34.7097	25.76	32.1204	35.7377	36.941	36.3255	35.5018	25.76	32.1204	35.7377	36.9532	36.5536	36.4303	35.7253	25.76	32.1204	35.7377	36.9532	36.5351	35.5577	36.4735	35.9298	25.76	32.8927
25.8	35.1532	36.4427	36.6706	36.5105	35.8369	25.8	34.4277	37.2475	37.8094	37.1801	37.1127	36.7136	25.8	34.4277	37.2475	37.8094	37.1801	36.4057	36.0227		25.8	29.7449	35.5825	35.9608	35.1843	34.7409	25.8	32.1717	35.7749	36.9839	36.2699	35.4769	25.8	32.1717	35.7749	37.0269	36.5536	36.5166	35.7377	25.8	32.1717	35.7749	37.0269	36.5105	35.5328	36.4612	36.0351	25.8	32.9308
25.84	35.0097	36.4612	36.6952	36.4427	35.8865	25.84	34.459	37.3209	37.8459	37.2291	37.1127	36.689	25.84	34.459	37.3209	37.8459	37.1434	36.4427	36.0165		25.84	29.6532	35.6384	35.9732	35.1532	34.7284	25.84	32.1653	35.7377	36.9839	36.3131	35.508	25.84	32.1653	35.7377	36.9532	36.6336	36.5351	35.7625	25.84	32.1653	35.7377	36.9532	36.4981	35.5701	36.4365	36.0165	25.84	32.9117
25.88	35.0659	36.5659	36.7136	36.4735	35.8803	25.88	34.4465	37.3332	37.8216	37.223	37.1434	36.7259	25.88	34.4465	37.3332	37.8216	37.1434	36.4242	36.0103		25.88	29.6598	35.7067	35.8989	35.2093	34.7159	25.88	32.0372	35.7315	36.9778	36.3502	35.5142	25.88	32.0372	35.7315	36.9532	36.5721	36.4858	35.7873	25.88	32.0372	35.7315	36.9532	36.4797	35.5266	36.4735	36.0289	25.88	32.9117
25.92	35.1095	36.5782	36.7444	36.5105	35.9236	25.92	34.4716	37.2842	37.7972	37.2169	37.1005	36.7321	25.92	34.4716	37.2842	37.7972	37.1495	36.4427	36.0041		25.92	29.6532	35.6695	35.9236	35.2342	34.7785	25.92	32.0692	35.7625	36.9717	36.3502	35.5391	25.92	32.0692	35.7625	36.9901	36.5659	36.5536	35.7935	25.92	32.0692	35.7625	36.9901	36.4612	35.508	36.4797	36.0227	25.92	32.8736
25.96	35.1906	36.6336	36.7075	36.4981	35.8431	25.96	34.528	37.3454	37.7911	37.272	37.0759	36.7382	25.96	34.528	37.3454	37.7911	37.2108	36.4118	36.0969		25.96	29.6794	35.6695	35.9051	35.2778	34.766	25.96	32.2229	35.8307	37.0698	36.3625	35.5204	25.96	32.2229	35.8307	37.0637	36.5659	36.5043	35.7687	25.96	32.2229	35.8307	37.0637	36.4858	35.5328	36.5105	36.0536	25.96	33.0134
26	35.2404	36.6275	36.7198	36.3872	35.7811	26	34.5343	37.3148	37.9738	37.3026	37.0575	36.7751	26	34.5343	37.3148	37.9738	37.223	36.4118	36.1217		26	29.6925	35.6757	36.0289	35.3774	34.7472	26	32.2421	35.8617	37.033	36.3625	35.5391	26	32.2421	35.8617	37.0391	36.6398	36.4981	35.6695	26	32.2421	35.8617	37.0391	36.5474	35.595	36.5782	36.0536	26	33.0007
26.08	35.2529	36.6275	36.769	36.4735	35.7625	26.08	34.5029	37.3148	37.9616	37.223	37.125	36.769	26.08	34.5029	37.3148	37.9616	37.2352	36.381	36.1155		26.08	29.7907	35.8989	36.0289	35.2716	34.7722	26.08	32.1909	35.8307	36.9839	36.307	35.4769	26.08	32.1909	35.8307	37.0207	36.6275	36.529	35.7315	26.08	32.1909	35.8307	37.0207	36.5536	35.5701	36.609	36.0227	26.08	32.9944
26.12	35.2093	36.5782	36.7567	36.4612	35.8245	26.12	34.459	37.3821	37.9495	37.2352	37.0943	36.8366	26.12	34.459	37.3821	37.9495	37.2108	36.4858	36.0536		26.12	29.7252	35.8555	36.0103	35.2466	34.8035	26.12	32.1653	35.8741	36.9348	36.2391	35.4458	26.12	32.1653	35.8741	37.0514	36.6398	36.5782	35.7439	26.12	32.1653	35.8741	37.0514	36.5721	35.5577	36.6398	36.0041	26.12	32.9499
26.16	35.2217	36.5782	36.7382	36.4673	35.8369	26.16	34.4779	37.3699	37.9312	37.2659	37.1679	36.7997	26.16	34.4779	37.3699	37.9312	37.2536	36.4242	36.0289		26.16	29.771	35.7315	36.0165	35.2591	34.7847	26.16	32.2165	35.9051	37.0882	36.2329	35.4956	26.16	32.2165	35.9051	37.1066	36.689	36.5597	35.7935	26.16	32.2165	35.9051	37.1066	36.5844	35.626	36.5721	36.0536	26.16	32.8672
26.2	35.2466	36.6706	36.7321	36.4858	35.8679	26.2	34.4716	37.4432	37.9129	37.2903	37.1066	36.8611	26.2	34.4716	37.4432	37.9129	37.2475	36.4735	36.0784		26.2	29.8103	35.7377	36.0289	35.2591	34.8223	26.2	32.2101	35.8989	37.1066	36.3995	35.5018	26.2	32.2101	35.8989	37.0943	36.6582	36.5782	35.7935	26.2	32.2101	35.8989	37.0943	36.5721	35.6695	36.5536	36.0907	26.2	32.8481
26.24	35.2342	36.6152	36.8427	36.4797	35.8555	26.24	34.4653	37.4249	37.9434	37.3087	37.0882	36.8427	26.24	34.4653	37.4249	37.9434	37.2842	36.492	36.1649		26.24	29.8103	35.7253	36.0227	35.2591	34.7972	26.24	32.2485	35.8493	37.0575	36.3748	35.5577	26.24	32.2485	35.8493	37.1066	36.6582	36.5844	35.8121	26.24	32.2485	35.8493	37.1066	36.5782	35.6695	36.5659	36.0845	26.24	32.8863
26.28	35.0721	36.6275	36.7567	36.4858	35.8617	26.28	34.5343	37.4555	38.1015	37.3271	37.1556	36.898	26.28	34.5343	37.4555	38.1015	37.3148	36.492	36.1773		26.28	29.8299	35.7687	36.0784	35.3089	34.7847	26.28	32.2485	35.8555	37.0269	36.3748	35.5888	26.28	32.2485	35.8555	37.0759	36.6952	36.6582	35.7873	26.28	32.2485	35.8555	37.0759	36.6521	35.6757	36.5597	36.1031	26.28	32.9245
26.32	35.122	36.6644	36.7136	36.4858	35.8369	26.32	34.5217	37.5593	38.0772	37.3087	37.1495	36.855	26.32	34.5217	37.5593	38.0772	37.3026	36.5105	36.2205		26.32	29.7972	35.7129	36.0845	35.3276	34.8223	26.32	32.1909	35.8431	37.0453	36.3131	35.6198	26.32	32.1909	35.8431	37.1005	36.7136	36.7075	35.8121	26.32	32.1909	35.8431	37.1005	36.6213	35.6633	36.5905	36.066	26.32	32.969
26.36	35.122	36.6829	36.7935	36.529	35.8183	26.36	34.5656	37.5776	38.0589	37.2903	37.0391	36.8673	26.36	34.5656	37.5776	38.0589	37.3209	36.4427	36.1155		26.36	29.7514	35.7129	36.1278	35.3587	34.866	26.36	32.1909	35.9236	37.1127	36.4242	35.6446	26.36	32.1909	35.9236	37.0943	36.8489	36.5844	35.8431	26.36	32.1909	35.9236	37.0943	36.5105	35.7005	36.5351	36.0165	26.36	32.988
26.4	35.2591	36.6582	36.8058	36.5967	35.8679	26.4	34.5531	37.5715	38.0772	37.3882	37.1434	36.855	26.4	34.5531	37.5715	38.0772	37.2903	36.4365	36.0969		26.4	29.7907	35.7749	36.2205	35.3525	34.9285	26.4	32.0884	35.9484	37.1372	36.4303	35.6074	26.4	32.0884	35.9484	37.0637	36.8304	36.609	35.8431	26.4	32.0884	35.9484	37.0637	36.6152	35.6881	36.6213	36.0227	26.4	33.0007
26.44	35.2529	36.6521	36.8489	36.5905	35.9236	26.44	34.528	37.6143	38.0711	37.4188	37.1434	36.8304	26.44	34.528	37.6143	38.0711	37.2352	36.4797	36.1526		26.44	29.7645	35.8121	36.1711	35.4085	34.8723	26.44	32.0756	35.967	37.1495	36.418	35.5391	26.44	32.0756	35.967	37.1066	36.8304	36.5905	35.7997	26.44	32.0756	35.967	37.1066	36.609	35.6881	36.6336	36.0536	26.44	32.9753
26.48	35.2653	36.7382	36.8611	36.5597	35.9236	26.48	34.4779	37.5471	38.0407	37.2536	37.1495	36.855	26.48	34.4779	37.5471	38.0407	37.2108	36.5043	36.2082		26.48	29.7907	35.7811	36.1711	35.3836	34.8035	26.48	32.0692	35.8927	37.1495	36.3193	35.5577	26.48	32.0692	35.8927	37.0575	36.855	36.6029	35.8555	26.48	32.0692	35.8927	37.0575	36.6213	35.7005	36.6336	35.8803	26.48	33.0516
26.52	35.2155	36.7444	36.8734	36.5782	35.9113	26.52	34.5844	37.5898	38.0103	37.2536	37.2046	36.8366	26.52	34.5844	37.5898	38.0103	37.2903	36.5782	36.1711		26.52	29.9083	35.7191	36.1155	35.3649	34.866	26.52	32.1333	35.8865	37.1556	36.3748	35.6384	26.52	32.1333	35.8865	37.1801	36.8243	36.6644	35.8555	26.52	32.1333	35.8865	37.1801	36.6459	35.6943	36.6644	36.0845	26.52	33.077
26.56	35.284	36.6706	36.8489	36.5474	35.9236	26.56	34.6032	37.6692	38.0772	37.2414	37.1801	36.8489	26.56	34.6032	37.6692	38.0772	37.4066	36.5043	36.2267		26.56	29.9279	35.7563	36.1093	35.3712	34.8535	26.56	32.082	35.936	37.174	36.4118	35.6384	26.56	32.082	35.936	37.2414	36.8489	36.6644	35.9236	26.56	32.082	35.936	37.2414	36.7813	35.6943	36.6213	36.0784	26.56	33.0643
26.6	35.3214	36.689	36.7751	36.5043	35.8493	26.6	34.622	37.657	38.0833	37.2414	37.2108	36.8673	26.6	34.622	37.657	38.0833	37.376	36.5721	36.1896		26.6	29.8037	35.7873	36.0907	35.3961	34.8785	26.6	32.1909	36.0722	37.1985	36.4612	35.6881	26.6	32.1909	36.0722	37.2475	36.8366	36.609	35.936	26.6	32.1909	36.0722	37.2475	36.7751	35.7191	36.6582	36.0845	26.6	33.0389
26.64	35.2342	36.7628	36.8366	36.4612	35.9236	26.64	34.6032	37.6509	38.144	37.223	37.1679	36.8181	26.64	34.6032	37.6509	38.144	37.3576	36.5043	36.2205		26.64	29.8103	35.7811	36.1217	35.3898	34.8535	26.64	32.2485	36.0351	37.2475	36.4427	35.7129	26.64	32.2485	36.0351	37.2536	36.7997	36.6336	35.9422	26.64	32.2485	36.0351	37.2536	36.7567	35.7253	36.6582	36.0103	26.64	33.1151
26.68	35.2404	36.6767	36.8304	36.5105	35.9298	26.68	34.5844	37.6021	38.1319	37.3148	37.2414	36.8058	26.68	34.5844	37.6021	38.1319	37.3943	36.4981	36.2143		26.68	29.8626	35.7873	36.1278	35.4085	34.916	26.68	32.2485	36.0598	37.3699	36.5413	35.7191	26.68	32.2485	36.0598	37.2169	36.7874	36.689	35.9113	26.68	32.2485	36.0598	37.2169	36.7444	35.6757	36.6644	36.0474	26.68	33.0579
26.72	35.3027	36.689	36.8366	36.5721	35.9175	26.72	34.6408	37.6326	38.1076	37.3209	37.3087	36.812	26.72	34.6408	37.6326	38.1076	37.3882	36.4488	36.2391		26.72	29.856	35.8121	36.1278	35.4209	34.916	26.72	32.2868	36.0474	37.3576	36.5721	35.7377	26.72	32.2868	36.0474	37.2046	36.8181	36.689	35.8927	26.72	32.2868	36.0474	37.2046	36.7321	35.6881	36.7013	36.0227	26.72	33.0897
26.76	35.4147	36.8796	36.7813	36.4858	35.9051	26.76	34.7409	37.6143	38.0893	37.3882	37.3148	36.8857	26.76	34.7409	37.6143	38.0893	37.2903	36.4673	36.2143		26.76	29.9345	35.8183	36.1217	35.4769	34.941	26.76	32.2485	36.0536	37.3209	36.5967	35.7439	26.76	32.2485	36.0536	37.2291	36.7874	36.7075	35.9298	26.76	32.2485	36.0536	37.2291	36.7874	35.7253	36.7382	36.0227	26.76	33.1468
26.8	35.4209	36.8243	36.7935	36.5536	35.936	26.8	34.7472	37.5959	38.0833	37.3821	37.2597	36.855	26.8	34.7472	37.5959	38.0833	37.2842	36.4303	36.2143		26.8	29.9214	35.7997	36.1649	35.6695	35.0284	26.8	32.2996	36.1835	37.2903	36.5782	35.7501	26.8	32.2996	36.1835	37.2536	36.812	36.7198	35.9422	26.8	32.2996	36.1835	37.2536	36.7935	35.7377	36.7382	36.0413	26.8	33.1404
26.88	35.3774	36.8181	36.8427	36.529	35.9608	26.88	34.7159	37.6509	38.0954	37.3576	37.223	36.855	26.88	34.7159	37.6509	38.0954	37.2659	36.5105	36.1896		26.88	30.0063	35.9051	36.1402	35.6198	34.9972	26.88	32.1909	36.1649	37.3209	36.5659	35.8183	26.88	32.1909	36.1649	37.3638	36.7874	36.7567	35.8741	26.88	32.1909	36.1649	37.3638	36.7567	35.7377	36.7259	35.9917	26.88	33.0833
26.92	35.4334	36.7997	36.812	36.5782	35.9917	26.92	34.6971	37.6143	38.0589	37.3576	37.223	36.9103	26.92	34.6971	37.6143	38.0589	37.272	36.4981	36.1773		26.92	29.941	35.8741	36.1278	35.5577	34.941	26.92	32.2165	36.1031	37.3026	36.5474	35.7315	26.92	32.2165	36.1031	37.3271	36.8243	36.7259	35.8927	26.92	32.2165	36.1031	37.3271	36.8058	35.7501	36.7259	36.0413	26.92	33.0833
26.96	35.4769	36.8243	36.8796	36.5228	36.0103	26.96	34.6533	37.6082	38.138	37.5349	37.1924	36.9287	26.96	34.6533	37.6082	38.138	37.3026	36.529	36.2452		26.96	30.0715	35.8679	36.1958	35.5391	34.9785	26.96	32.2037	36.0784	37.2965	36.5536	35.7005	26.96	32.2037	36.0784	37.3026	36.8611	36.7198	35.967	26.96	32.2037	36.0784	37.3026	36.7751	35.7687	36.7321	36.0227	26.96	33.0516
27	35.452	36.8181	36.8734	36.5228	36.0413	27	34.5907	37.5898	38.1926	37.431	37.2169	36.8918	27	34.5907	37.5898	38.1926	37.2903	36.4488	36.1587		27	30.0781	35.8741	36.202	35.4645	34.9535	27	32.2612	36.0907	37.3943	36.5782	35.6322	27	32.2612	36.0907	37.3576	36.8058	36.7505	35.9608	27	32.2612	36.0907	37.3576	36.8611	35.7749	36.7628	36.1464	27	33.0579
27.04	35.3898	36.812	36.9655	36.6398	36.0351	27.04	34.5656	37.5898	38.2169	37.3638	37.2965	36.898	27.04	34.5656	37.5898	38.2169	37.3148	36.4673	36.2205		27.04	30.0193	35.9113	36.2452	35.4645	34.9847	27.04	32.2549	36.0474	37.376	36.5536	35.6384	27.04	32.2549	36.0474	37.3148	36.8304	36.7259	35.9422	27.04	32.2549	36.0474	37.3148	36.8304	35.7749	36.7935	36.1649	27.04	33.0833
27.08	35.4458	36.7813	36.8857	36.5597	36.0227	27.08	34.6784	37.5959	38.2291	37.5532	37.2903	36.9103	27.08	34.6784	37.5959	38.2291	37.2842	36.5228	36.307		27.08	29.9802	35.9051	36.2576	35.5204	35.0596	27.08	32.2549	36.1155	37.3271	36.6029	35.7501	27.08	32.2549	36.1155	37.3271	36.8918	36.7751	35.9175	27.08	32.2549	36.1155	37.3271	36.7321	35.8369	36.7013	36.1835	27.08	33.1151
27.12	35.4396	36.7813	36.9778	36.6767	36.1278	27.12	34.7034	37.5593	38.1987	37.5776	37.2965	36.9164	27.12	34.7034	37.5593	38.1987	37.2903	36.5043	36.2761		27.12	29.941	35.9051	36.2823	35.5577	34.9785	27.12	32.4146	36.1278	37.3209	36.609	35.7935	27.12	32.4146	36.1278	37.3148	36.9348	36.7259	35.9175	27.12	32.4146	36.1278	37.3148	36.7813	35.7253	36.7075	36.1896	27.12	33.1912
27.16	35.4023	36.8734	36.9532	36.6767	36.066	27.16	34.6784	37.6265	38.138	37.5532	37.2659	36.9226	27.16	34.6784	37.6265	38.138	37.3332	36.5105	36.3193		27.16	29.9932	35.9113	36.2452	35.5391	35.0534	27.16	32.3699	36.134	37.2965	36.5782	35.7501	27.16	32.3699	36.134	37.3148	36.9348	36.7813	35.8803	27.16	32.3699	36.134	37.3148	36.7628	35.7129	36.7259	36.1155	27.16	33.1468
27.2	35.4956	36.8489	36.941	36.6459	36.0598	27.2	34.6721	37.6875	38.0833	37.3882	37.2842	37.0023	27.2	34.6721	37.6875	38.0833	37.4188	36.5782	36.2823		27.2	30.0193	35.9732	36.2329	35.5701	35.0471	27.2	32.3763	36.1526	37.4249	36.5844	35.7749	27.2	32.3763	36.1526	37.3882	36.9348	36.7935	35.8989	27.2	32.3763	36.1526	37.3882	36.5659	35.7935	36.7997	36.066	27.2	33.2166
27.24	35.4769	36.8611	36.9717	36.455	36.0103	27.24	34.6909	37.6814	38.2169	37.486	37.272	37.0453	27.24	34.6909	37.6814	38.2169	37.4371	36.5967	36.3193		27.24	29.9932	35.9979	36.2205	35.6074	35.0659	27.24	32.3699	36.1711	37.4555	36.5905	35.7191	27.24	32.3699	36.1711	37.431	36.941	36.7751	36.0227	27.24	32.3699	36.1711	37.431	36.6706	35.8307	36.7567	36.0598	27.24	33.1849
27.28	35.5328	36.8489	36.9778	36.5597	36.0474	27.28	34.7034	37.8277	38.1562	37.3454	37.1801	36.9839	27.28	34.7034	37.8277	38.1562	37.3821	36.5659	36.3131		27.28	29.9736	36.0351	36.3008	35.6012	35.0721	27.28	32.4019	36.1649	37.4494	36.6829	35.7377	27.28	32.4019	36.1649	37.376	36.9655	36.7259	35.9732	27.28	32.4019	36.1649	37.376	36.6644	35.8307	36.7935	36.134	27.28	33.2039
27.32	35.5888	36.855	36.9655	36.6275	35.9917	27.32	34.6471	37.7972	38.144	37.3454	37.2291	37.0575	27.32	34.6471	37.7972	38.144	37.3209	36.5597	36.2884		27.32	29.9867	35.9917	36.3933	35.5453	35.0159	27.32	32.4594	36.1587	37.4188	36.7321	35.7315	27.32	32.4594	36.1587	37.3821	36.9655	36.7874	36.0041	27.32	32.4594	36.1587	37.3821	36.6767	35.936	36.8058	36.0722	27.32	33.2039
27.36	35.4831	36.7997	36.9839	36.6152	35.9794	27.36	34.6721	37.7545	38.1683	37.4066	37.1924	37.033	27.36	34.6721	37.7545	38.1683	37.3271	36.5597	36.2514		27.36	29.9867	35.9979	36.3131	35.5391	35.0783	27.36	32.4657	36.1402	37.3699	36.7013	35.7935	27.36	32.4657	36.1402	37.4188	36.9226	36.8181	36.0103	27.36	32.4657	36.1402	37.4188	36.7444	35.9917	36.8304	36.134	27.36	33.1595
27.4	35.5266	36.9287	36.9655	36.6213	36.0289	27.4	34.7097	37.657	38.0893	37.3638	37.3332	37.0759	27.4	34.7097	37.657	38.0893	37.4127	36.6152	36.3008		27.4	30.0128	35.9484	36.2946	35.5577	35.0471	27.4	32.2612	36.1217	37.3209	36.6459	35.7873	27.4	32.2612	36.1217	37.4188	36.9532	36.8304	36.0041	27.4	32.2612	36.1217	37.4188	36.7751	35.9917	36.8304	36.1031	27.4	33.2483
27.44	35.4583	36.8796	36.9594	36.5474	36.0413	27.44	34.6596	37.6814	38.1501	37.4004	37.3087	37.0759	27.44	34.6596	37.6814	38.1501	37.4127	36.6152	36.2761		27.44	29.9606	35.8989	36.3193	35.6012	35.0347	27.44	32.2612	36.1278	37.4004	36.6521	35.7439	27.44	32.2612	36.1278	37.4127	36.9226	36.8611	35.9856	27.44	32.2612	36.1278	37.4127	36.8058	35.9422	36.8181	36.1155	27.44	33.1658
27.48	35.4831	36.8673	36.9594	36.5967	36.0289	27.48	34.7097	37.718	38.2412	37.3393	37.2903	37.1005	27.48	34.7097	37.718	38.2412	37.4004	36.609	36.2452		27.48	30.0389	35.936	36.3131	35.6198	35.0534	27.48	32.2485	36.0722	37.4249	36.6459	35.8121	27.48	32.2485	36.0722	37.4432	36.9532	36.8058	36.0041	27.48	32.2485	36.0722	37.4432	36.9532	35.8741	36.8427	36.1711	27.48	33.2356
27.52	35.508	36.8796	37.0453	36.5536	36.1155	27.52	34.791	37.7058	38.2169	37.3148	37.3638	37.1617	27.52	34.791	37.7058	38.2169	37.4799	36.6398	36.2514		27.52	30.0324	35.9979	36.3625	35.6322	35.0721	27.52	32.2612	36.1773	37.4004	36.5536	35.7935	27.52	32.2612	36.1773	37.3882	36.855	36.769	36.0784	27.52	32.2612	36.1773	37.3882	36.8058	35.8803	36.7997	36.1711	27.52	33.2419
27.56	35.4769	36.8796	36.9839	36.5659	36.0474	27.56	34.8285	37.6936	38.1683	37.3026	37.3271	37.0637	27.56	34.8285	37.6936	38.1683	37.431	36.6582	36.2638		27.56	30.0454	35.8679	36.3872	35.626	35.0596	27.56	32.3763	36.2699	37.4127	36.6029	35.7439	27.56	32.3763	36.2699	37.4371	36.8796	36.7567	36.0103	27.56	32.3763	36.2699	37.4371	36.7382	35.8493	36.8304	36.0907	27.56	33.28
27.6	35.5142	36.8673	37.0575	36.6582	36.066	27.6	34.791	37.6997	38.138	37.3638	37.3882	37.1188	27.6	34.791	37.6997	38.138	37.3148	36.6521	36.2205		27.6	30.0063	35.967	36.3625	35.626	35.1469	27.6	32.4274	36.2391	37.4921	36.6644	35.7935	27.6	32.4274	36.2391	37.5349	36.9287	36.7751	35.967	27.6	32.4274	36.2391	37.5349	36.8243	35.8803	36.8304	36.1093	27.6	33.2673
27.64	35.5515	36.8734	37.0514	36.7505	36.1464	27.64	34.7535	37.5898	38.1076	37.3699	37.3699	37.0882	27.64	34.7535	37.5898	38.1076	37.3515	36.6459	36.2143		27.64	29.9345	36.0598	36.3378	35.6198	35.1594	27.64	32.4338	36.1155	37.3332	36.6706	35.8493	27.64	32.4338	36.1155	37.5898	37.0453	36.8611	36.0536	27.64	32.4338	36.1155	37.5898	36.8427	35.9113	36.8857	36.1464	27.64	33.2863
27.72	35.5701	36.855	36.9901	36.7382	36.1278	27.72	34.791	37.6753	38.1926	37.3943	37.3943	37.1127	27.72	34.791	37.6753	38.1926	37.3515	36.6582	36.2267		27.72	29.9932	36.1155	36.307	35.6508	35.1469	27.72	32.421	36.1093	37.431	36.6336	35.8617	27.72	32.421	36.1093	37.7485	37.033	36.855	36.0413	27.72	32.421	36.1093	37.7485	36.7935	35.9113	36.9778	36.1896	27.72	33.356
27.76	35.6012	37.0575	37.0575	36.7505	36.202	27.76	34.8723	37.7972	38.1623	37.4004	37.3271	37.1005	27.76	34.8723	37.7972	38.1623	37.3393	36.6336	36.2761		27.76	30.0324	36.1278	36.3625	35.6508	35.1843	27.76	32.5423	36.1217	37.5227	36.6706	35.9113	27.76	32.5423	36.1217	37.4921	36.898	36.8918	36.066	27.76	32.5423	36.1217	37.4921	36.7751	35.8927	36.9164	36.2143	27.76	33.337
27.8	35.5701	36.9901	37.0391	36.7136	36.1958	27.8	34.866	37.7545	38.2837	37.4188	37.3393	37.1005	27.8	34.866	37.7545	38.2837	37.3087	36.7013	36.2452		27.8	29.9998	36.1464	36.4057	35.6819	35.2093	27.8	32.5678	36.1031	37.541	36.6706	35.9546	27.8	32.5678	36.1031	37.4616	36.9041	36.8857	36.0598	27.8	32.5678	36.1031	37.4616	36.855	35.9546	36.941	36.1773	27.8	33.3243
27.84	35.5701	36.9226	37.0759	36.7198	36.1773	27.84	34.9098	37.7789	38.2533	37.4188	37.3943	37.125	27.84	34.9098	37.7789	38.2533	37.3209	36.7075	36.2699		27.84	29.9932	36.134	36.4488	35.6571	35.1968	27.84	32.5551	36.1155	37.5715	36.7321	35.936	27.84	32.5551	36.1155	37.4249	36.8918	36.8796	36.1031	27.84	32.5551	36.1155	37.4249	36.8243	35.9298	36.9778	36.1649	27.84	33.318
27.88	35.5577	36.9164	37.1188	36.7505	36.1711	27.88	34.8285	37.7545	38.223	37.4127	37.431	37.0882	27.88	34.8285	37.7545	38.223	37.3332	36.689	36.2823		27.88	30.1433	36.0165	36.4673	35.6322	35.1345	27.88	32.5104	36.1587	37.4921	36.7136	35.9546	27.88	32.5104	36.1587	37.4127	36.9041	36.8489	36.0598	27.88	32.5104	36.1587	37.4127	36.7935	35.9175	36.9226	36.2205	27.88	33.2926
27.92	35.5515	36.9594	37.0943	36.7136	36.1464	27.92	34.8785	37.7667	38.1866	37.4494	37.4127	37.1188	27.92	34.8785	37.7667	38.1866	37.4004	36.689	36.2761		27.92	30.0193	36.0103	36.4365	35.6695	35.1906	27.92	32.4785	36.1835	37.4982	36.7013	35.9051	27.92	32.4785	36.1835	37.3821	37.0146	36.8796	36.066	27.92	32.4785	36.1835	37.3821	36.8304	35.9484	36.855	36.2761	27.92	33.3307
27.96	35.626	36.9778	37.033	36.7874	36.1711	27.96	34.9285	37.7728	38.0893	37.4127	37.3638	37.0943	27.96	34.9285	37.7728	38.0893	37.3087	36.6767	36.2884		27.96	30.0585	36.1217	36.4488	35.7253	35.1407	27.96	32.4785	36.1155	37.4921	36.6336	35.8307	27.96	32.4785	36.1155	37.3699	37.033	36.898	36.0536	27.96	32.4785	36.1155	37.3699	36.8058	35.9546	36.898	36.2638	27.96	33.2926
28	35.5266	36.9287	36.9778	36.689	36.1649	28	34.891	37.7545	38.1319	37.4004	37.4494	37.1188	28	34.891	37.7545	38.1319	37.3087	36.5967	36.2946		28	30.0846	36.1093	36.4673	35.7129	35.1282	28	32.453	36.1093	37.5043	36.6829	35.9175	28	32.453	36.1093	37.4127	37.0146	36.8796	36.0845	28	32.453	36.1093	37.4127	36.8243	35.9732	36.898	36.2267	28	33.2673
28.04	35.5391	37.0269	37.0269	36.689	36.1464	28.04	35.0409	37.6875	38.1744	37.4555	37.4555	37.1005	28.04	35.0409	37.6875	38.1744	37.2903	36.6029	36.4118		28.04	30.065	36.1958	36.5166	35.6757	35.1345	28.04	32.4785	36.1402	37.6204	36.6829	35.9422	28.04	32.4785	36.1402	37.5532	37.0023	36.9655	36.0845	28.04	32.4785	36.1402	37.5532	36.8304	36.0165	37.0207	36.2823	28.04	33.3116
28.08	35.5515	36.9962	37.0391	36.7136	36.1031	28.08	34.9972	37.6692	38.1683	37.5288	37.4616	37.1311	28.08	34.9972	37.6692	38.1683	37.3026	36.7013	36.4365		28.08	30.052	36.1958	36.492	35.6757	35.1719	28.08	32.4977	36.1587	37.4432	36.7075	35.9546	28.08	32.4977	36.1587	37.5471	36.9226	36.9287	36.0907	28.08	32.4977	36.1587	37.5471	36.8243	35.967	36.9839	36.2699	28.08	33.2166
28.12	35.5825	36.9532	37.1066	36.7935	36.1155	28.12	35.0783	37.8459	38.1623	37.4738	37.4249	37.174	28.12	35.0783	37.8459	38.1623	37.2965	36.6706	36.3008		28.12	29.9867	36.1711	36.5166	35.7253	35.203	28.12	32.5296	36.1587	37.4616	36.7075	35.9856	28.12	32.5296	36.1587	37.4982	36.8857	36.8857	36.0907	28.12	32.5296	36.1587	37.4982	36.7997	35.9236	36.9594	36.3008	28.12	33.1975
28.16	35.626	36.9532	37.1005	36.8366	36.1278	28.16	35.0097	37.7606	38.1137	37.4555	37.3882	37.1862	28.16	35.0097	37.7606	38.1137	37.3393	36.689	36.3378		28.16	29.9932	36.1835	36.5043	35.7377	35.2093	28.16	32.5615	36.1896	37.5288	36.7198	35.9546	28.16	32.5615	36.1896	37.5898	36.8734	36.941	36.1278	28.16	32.5615	36.1896	37.5898	36.8611	35.9422	36.9287	36.2946	28.16	33.1912
28.2	35.5825	36.9778	37.0759	36.8427	36.2205	28.2	34.991	37.8033	38.138	37.3821	37.4127	37.174	28.2	34.991	37.8033	38.138	37.3209	36.7013	36.3255		28.2	30.0259	36.202	36.492	35.7253	35.2342	28.2	32.4657	36.1649	37.5959	36.6952	35.9422	28.2	32.4657	36.1649	37.6021	36.9778	36.9778	36.1031	28.2	32.4657	36.1649	37.6021	36.8181	35.9422	36.9778	36.2823	28.2	33.1849
28.24	35.7191	37.0269	36.9778	36.898	36.3748	28.24	34.8785	37.8033	38.144	37.5288	37.4004	37.1495	28.24	34.8785	37.8033	38.144	37.3454	36.6829	36.3316		28.24	30.0324	36.2391	36.455	35.7501	35.2217	28.24	32.5487	36.1773	37.5471	36.7259	35.9608	28.24	32.5487	36.1773	37.5471	37.0821	36.9226	36.0722	28.24	32.5487	36.1773	37.5471	36.7935	35.967	36.9226	36.3563	28.24	33.1658
28.28	35.626	37.0575	37.0085	36.8673	36.202	28.28	34.8473	37.785	38.138	37.4432	37.4249	37.1801	28.28	34.8473	37.785	38.138	37.4004	36.6706	36.344		28.28	29.9998	36.2391	36.4858	35.7129	35.228	28.28	32.5359	36.2576	37.5288	36.7444	36.0103	28.28	32.5359	36.2576	37.5105	37.033	36.9287	36.1093	28.28	32.5359	36.2576	37.5105	36.8734	36.0474	36.9962	36.3933	28.28	33.3307
28.32	35.6633	37.0759	37.0453	36.7997	36.1835	28.32	34.8473	37.8277	38.1258	37.541	37.4799	37.1985	28.32	34.8473	37.8277	38.1258	37.4004	36.7321	36.381		28.32	30.0193	36.2638	36.5597	35.7191	35.2529	28.32	32.4849	36.1711	37.5166	36.6952	36.0289	28.32	32.4849	36.1711	37.4921	37.0637	36.898	36.0413	28.32	32.4849	36.1711	37.4921	36.855	35.9979	36.9532	36.3872	28.32	33.299
28.36	35.5639	37.0943	37.0269	36.8427	36.2514	28.36	34.9035	37.8216	38.1319	37.5349	37.4555	37.1556	28.36	34.9035	37.8216	38.1319	37.4188	36.7505	36.381		28.36	29.9736	36.2761	36.4797	35.7377	35.2155	28.36	32.4849	36.1896	37.5166	36.7136	35.9794	28.36	32.4849	36.1896	37.4494	37.0575	36.9103	36.066	28.36	32.4849	36.1896	37.4494	36.8304	36.0289	37.0514	36.3193	28.36	33.375
28.4	35.5391	37.0943	37.125	36.8243	36.1958	28.4	34.8785	37.7485	38.144	37.4921	37.4188	37.1924	28.4	34.8785	37.7485	38.144	37.486	36.7751	36.4427		28.4	29.9932	36.2761	36.4673	35.7997	35.1906	28.4	32.4785	36.1649	37.5288	36.7198	35.9175	28.4	32.4785	36.1649	37.5227	37.0207	36.9655	36.0907	28.4	32.4785	36.1649	37.5227	36.8304	35.9979	37.0453	36.3316	28.4	33.2546
28.44	35.5515	36.9532	37.1311	36.8734	36.1835	28.44	34.8848	37.7667	38.1683	37.5043	37.431	37.1801	28.44	34.8848	37.7667	38.1683	37.4555	36.7321	36.4735		28.44	30.0324	36.2576	36.5166	35.8493	35.1719	28.44	32.3188	36.1896	37.5105	36.7628	35.9422	28.44	32.3188	36.1896	37.4432	36.9778	37.0146	36.0784	28.44	32.3188	36.1896	37.4432	36.8427	36.0103	37.0207	36.344	28.44	33.3243
28.48	35.5515	36.9778	37.125	36.9287	36.1711	28.48	34.9472	37.7667	38.2351	37.5166	37.4738	37.1801	28.48	34.9472	37.7667	38.2351	37.4432	36.7259	36.4242		28.48	29.9932	36.2699	36.529	35.8679	35.2155	28.48	32.3955	36.2143	37.5043	36.7321	35.9422	28.48	32.3955	36.2143	37.4799	36.9778	36.9594	36.2452	28.48	32.3955	36.2143	37.4799	36.8796	35.9051	37.0085	36.3933	28.48	33.2926
28.56	35.595	37.0269	37.1924	36.941	36.2391	28.56	34.8223	37.785	38.1015	37.4982	37.4677	37.1679	28.56	34.8223	37.785	38.1015	37.4432	36.7382	36.5166		28.56	30.0193	36.2514	36.5351	35.7749	35.2653	28.56	32.4657	36.1711	37.5288	36.7874	35.9732	28.56	32.4657	36.1711	37.4982	36.9778	36.9471	36.1464	28.56	32.4657	36.1711	37.4982	36.9164	35.9484	37.0207	36.3748	28.56	33.2863
28.6	35.6446	37.0391	37.2169	36.941	36.2082	28.6	34.8535	37.8094	38.1623	37.5043	37.5349	37.223	28.6	34.8535	37.8094	38.1623	37.4371	36.8058	36.4797		28.6	30.0389	36.2699	36.5166	35.7439	35.2591	28.6	32.4849	36.1958	37.5166	36.812	35.9794	28.6	32.4849	36.1958	37.5043	36.9839	36.941	36.134	28.6	32.4849	36.1958	37.5043	36.9471	36.066	37.0637	36.3933	28.6	33.2863
28.64	35.5701	37.0207	37.1801	36.941	36.1958	28.64	34.8848	37.785	38.1926	37.4982	37.4982	37.1862	28.64	34.8848	37.785	38.1926	37.4066	36.7997	36.4427		28.64	29.9541	36.2205	36.5166	35.8183	35.2902	28.64	32.5168	36.2143	37.5105	36.8673	35.9979	28.64	32.5168	36.2143	37.5043	37.0514	36.9839	36.1526	28.64	32.5168	36.2143	37.5043	36.9655	36.0722	37.0759	36.381	28.64	33.4067
28.68	35.6012	37.0085	37.1311	36.9041	36.202	28.68	34.8848	37.785	38.1683	37.5959	37.5043	37.2291	28.68	34.8848	37.785	38.1683	37.4127	36.7444	36.4612		28.68	29.9998	36.2329	36.5105	35.8741	35.3089	28.68	32.504	36.202	37.5715	36.8304	35.9608	28.68	32.504	36.202	37.5288	37.0269	37.0207	36.134	28.68	32.504	36.202	37.5288	36.9471	36.0536	37.0023	36.3563	28.68	33.4003
28.72	35.7129	37.0637	37.125	36.8857	36.1773	28.72	34.8848	37.7789	38.1987	37.657	37.5105	37.2169	28.72	34.8848	37.7789	38.1987	37.4004	36.769	36.4981		28.72	29.9802	36.2638	36.4858	35.8307	35.2902	28.72	32.453	36.1711	37.5288	36.8366	36.0165	28.72	32.453	36.1711	37.5349	37.0269	37.1005	36.1587	28.72	32.453	36.1711	37.5349	37.0207	36.0722	36.9778	36.381	28.72	33.451
28.76	35.6819	37.0821	37.0391	36.9164	36.2391	28.76	34.866	37.7789	38.1744	37.5837	37.541	37.3576	28.76	34.866	37.7789	38.1744	37.376	36.812	36.4673		28.76	29.9083	36.2638	36.5413	35.8369	35.2529	28.76	32.5104	36.1896	37.6082	36.8304	35.9917	28.76	32.5104	36.1896	37.5043	37.0453	37.0821	36.1402	28.76	32.5104	36.1896	37.5043	37.1005	36.0598	37.0391	36.492	28.76	33.4256
28.8	35.6508	37.0637	37.0575	36.9594	36.2329	28.8	34.8348	37.8033	38.1501	37.5288	37.5349	37.2475	28.8	34.8348	37.8033	38.1501	37.3638	36.8181	36.4427		28.8	29.9606	36.2699	36.6029	35.8741	35.2965	28.8	32.5615	36.2267	37.6265	36.8796	35.9979	28.8	32.5615	36.2267	37.486	37.0514	37.0759	36.1711	28.8	32.5615	36.2267	37.486	37.0759	36.0598	37.1188	36.4797	28.8	33.3497
28.84	35.6757	37.0391	37.0391	36.9901	36.2452	28.84	34.8098	37.7606	38.1501	37.6082	37.4921	37.2659	28.84	34.8098	37.7606	38.1501	37.4066	36.812	36.455		28.84	29.9736	36.2638	36.6582	35.9051	35.3276	28.84	32.5168	36.2143	37.7058	36.855	36.0227	28.84	32.5168	36.2143	37.5105	37.0637	37.0698	36.2699	28.84	32.5168	36.2143	37.5105	37.0575	36.0536	37.1434	36.4735	28.84	33.2926
28.88	35.6571	37.0391	37.1924	36.9287	36.3008	28.88	34.9847	37.7911	38.144	37.7728	37.4982	37.2352	28.88	34.9847	37.7911	38.144	37.3943	36.8304	36.418		28.88	29.9606	36.2761	36.6336	35.9484	35.3712	28.88	32.4913	36.307	37.6387	36.8796	36.0165	28.88	32.4913	36.307	37.5105	37.1924	37.0637	36.2329	28.88	32.4913	36.307	37.5105	37.0023	36.0845	37.125	36.4427	28.88	33.3116
28.92	35.626	37.0514	37.1679	36.9287	36.307	28.92	35.0034	37.8155	38.138	37.6082	37.5105	37.2475	28.92	35.0034	37.8155	38.138	37.4738	36.8673	36.4242		28.92	29.9671	36.2823	36.6644	35.7687	35.3587	28.92	32.5104	36.2699	37.6509	36.8796	36.0165	28.92	32.5104	36.2699	37.4738	37.1924	37.0575	36.3255	28.92	32.5104	36.2699	37.4738	36.9901	36.066	37.1188	36.4612	28.92	33.394
28.96	35.7067	37.0269	37.1617	36.9164	36.2514	28.96	34.9972	37.7485	38.1501	37.5898	37.5043	37.2536	28.96	34.9972	37.7485	38.1501	37.4432	36.855	36.4981		28.96	30.065	36.307	36.6952	35.7811	35.3525	28.96	32.4721	36.2329	37.6082	36.8796	36.0907	28.96	32.4721	36.2329	37.486	37.0637	37.033	36.2267	28.96	32.4721	36.2329	37.486	36.9778	36.0598	37.1066	36.492	28.96	33.4003
29	35.7129	37.0637	37.1372	36.9287	36.3378	29	34.9285	37.785	38.1744	37.5288	37.4921	37.3271	29	34.9285	37.785	38.1744	37.431	36.8427	36.4673		29	30.0454	36.2823	36.689	35.8431	35.3338	29	32.4721	36.2082	37.6692	36.8857	36.066	29	32.4721	36.2082	37.5166	37.1127	37.1005	36.1896	29	32.4721	36.2082	37.5166	37.125	36.0907	37.0943	36.5228	29	33.451
29.04	35.6757	37.1372	37.1801	36.9594	36.344	29.04	34.9223	37.7789	38.1805	37.5227	37.5043	37.3332	29.04	34.9223	37.7789	38.1805	37.3576	36.7505	36.4612		29.04	30.0193	36.3131	36.6275	35.8617	35.284	29.04	32.5742	36.1835	37.6387	36.8673	36.0413	29.04	32.5742	36.1835	37.5959	37.1617	37.1066	36.2143	29.04	32.5742	36.1835	37.5959	37.0821	36.0907	37.1127	36.4673	29.04	33.4067
29.08	35.7067	37.0943	37.2291	37.033	36.3625	29.08	34.9972	37.8094	38.1805	37.541	37.541	37.3209	29.08	34.9972	37.8094	38.1805	37.5105	36.7874	36.4735		29.08	30.1368	36.2946	36.6029	35.8121	35.2902	29.08	32.5933	36.2205	37.6448	36.8611	36.0536	29.08	32.5933	36.2205	37.5532	37.1188	37.0821	36.1835	29.08	32.5933	36.2205	37.5532	37.1005	36.134	37.1188	36.4673	29.08	33.4636
29.12	35.7005	37.0514	37.2659	37.033	36.307	29.12	34.9597	37.8216	38.1683	37.5532	37.4432	37.3148	29.12	34.9597	37.8216	38.1683	37.4616	36.8427	36.6029		29.12	30.1889	36.2884	36.5905	35.8245	35.3338	29.12	32.5487	36.2452	37.6631	36.8181	36.0969	29.12	32.5487	36.2452	37.5654	37.1434	37.1434	36.1896	29.12	32.5487	36.2452	37.5654	37.0698	36.1155	37.0698	36.4797	29.12	33.4067
29.16	35.7067	37.0514	37.2414	37.033	36.3748	29.16	34.9035	37.8155	38.1805	37.5654	37.4982	37.3576	29.16	34.9035	37.8155	38.1805	37.5166	36.7382	36.5967		29.16	30.1824	36.2514	36.5782	35.8679	35.2965	29.16	32.5359	36.2329	37.7119	36.8304	36.134	29.16	32.5359	36.2329	37.5227	37.125	37.0943	36.1464	29.16	32.5359	36.2329	37.5227	37.0575	36.0722	37.0637	36.5351	29.16	33.3813
29.2	35.6819	37.0575	37.174	37.033	36.418	29.2	34.9722	37.8338	38.2412	37.6387	37.5837	37.3515	29.2	34.9722	37.8338	38.2412	37.4799	36.769	36.5905		29.2	30.1498	36.2946	36.6213	35.8431	35.284	29.2	32.5487	36.2267	37.718	36.8611	36.0598	29.2	32.5487	36.2267	37.5105	37.0943	37.1066	36.134	29.2	32.5487	36.2267	37.5105	37.0391	36.066	37.1434	36.5536	29.2	33.394
29.24	35.6819	37.0391	37.2108	37.1188	36.418	29.24	34.9535	37.852	38.1805	37.6387	37.6021	37.2781	29.24	34.9535	37.852	38.1805	37.4982	36.9164	36.5659		29.24	30.0846	36.2514	36.7013	35.8803	35.3463	29.24	32.5296	36.2267	37.6692	36.9655	36.1155	29.24	32.5296	36.2267	37.5471	37.1066	37.0575	36.202	29.24	32.5296	36.2267	37.5471	37.0514	36.0907	37.2046	36.5905	29.24	33.3687
29.28	35.6695	37.1188	37.1985	37.1066	36.4242	29.28	34.966	37.8399	38.1805	37.6753	37.6082	37.3148	29.28	34.966	37.8399	38.1805	37.4982	36.941	36.529		29.28	30.1107	36.3193	36.6767	35.8493	35.3961	29.28	32.5678	36.2452	37.6082	36.9348	35.9979	29.28	32.5678	36.2452	37.5532	37.1372	37.0146	36.202	29.28	32.5678	36.2452	37.5532	37.0759	36.0784	37.2046	36.6459	29.28	33.3813
29.32	35.6633	37.0943	37.1862	37.125	36.4303	29.32	35.0034	37.8459	38.223	37.6753	37.5898	37.3332	29.32	35.0034	37.8459	38.223	37.5105	36.898	36.5536		29.32	30.1042	36.3131	36.6829	35.9051	35.34	29.32	32.5359	36.2823	37.6753	36.9778	36.0351	29.32	32.5359	36.2823	37.5898	37.1495	37.0882	36.3131	29.32	32.5359	36.2823	37.5898	37.0391	36.1093	37.1005	36.6336	29.32	33.4636
29.4	35.6695	37.1005	37.1556	37.0269	36.4118	29.4	35.0159	37.8703	38.1744	37.657	37.6143	37.3393	29.4	35.0159	37.8703	38.1744	37.5715	36.9164	36.5905		29.4	30.2085	36.344	36.7382	35.936	35.34	29.4	32.4913	36.2699	37.6814	36.9839	36.1031	29.4	32.4913	36.2699	37.5288	37.2352	37.1127	36.3995	29.4	32.4913	36.2699	37.5288	37.0207	36.1464	37.0943	36.6213	29.4	33.375
29.44	35.6881	37.1311	37.1556	37.0637	36.4303	29.44	35.1158	37.8399	38.2412	37.6143	37.6021	37.3576	29.44	35.1158	37.8399	38.2412	37.5898	36.9041	36.5905		29.44	30.1694	36.344	36.7444	35.9546	35.3152	29.44	32.453	36.3316	37.6631	36.9839	36.1093	29.44	32.453	36.3316	37.5349	37.2597	37.1434	36.4242	29.44	32.453	36.3316	37.5349	36.9901	36.1773	37.0821	36.6644	29.44	33.4573
29.48	35.7067	37.1311	37.1556	37.0575	36.4735	29.48	35.097	37.8338	38.2351	37.6692	37.6265	37.3209	29.48	35.097	37.8338	38.2351	37.6143	36.9594	36.6275		29.48	30.241	36.3563	36.7382	36.0041	35.3214	29.48	32.4721	36.344	37.6753	37.0085	36.0845	29.48	32.4721	36.344	37.5593	37.2965	37.1679	36.3687	29.48	32.4721	36.344	37.5593	37.0514	36.2205	37.1434	36.5659	29.48	33.4383
29.52	35.7873	37.1556	37.2108	37.0269	36.4303	29.52	35.0596	37.7667	38.2655	37.6753	37.6753	37.3393	29.52	35.0596	37.7667	38.2655	37.5715	36.9348	36.609		29.52	30.1889	36.3748	36.7567	35.9917	35.3649	29.52	32.4913	36.3502	37.6936	37.0085	36.0907	29.52	32.4913	36.3502	37.5959	37.2291	37.1985	36.3193	29.52	32.4913	36.3502	37.5959	37.0698	36.2082	37.1556	36.6459	29.52	33.4256
29.56	35.8493	37.2291	37.2169	37.1066	36.4303	29.56	35.0471	37.8399	38.2898	37.6753	37.6265	37.3454	29.56	35.0471	37.8399	38.2898	37.6082	36.9717	36.6398		29.56	30.1694	36.3872	36.7751	35.9917	35.3525	29.56	32.5806	36.3625	37.7119	37.0698	36.2267	29.56	32.5806	36.3625	37.5837	37.2414	37.1985	36.3687	29.56	32.5806	36.3625	37.5837	37.0882	36.1526	37.1434	36.6521	29.56	33.4067
29.6	35.8617	37.3209	37.1924	37.0453	36.4673	29.6	35.1282	37.8642	38.308	37.6814	37.6143	37.4188	29.6	35.1282	37.8642	38.308	37.6021	37.0575	36.5844		29.6	30.2019	36.4365	36.7935	35.9546	35.3525	29.6	32.5168	36.3378	37.7119	37.0391	36.2267	29.6	32.5168	36.3378	37.6448	37.223	37.1679	36.3625	29.6	32.5168	36.3378	37.6448	36.9901	36.2514	37.1801	36.6521	29.6	33.4003
29.64	35.9175	37.3087	37.223	37.0453	36.4981	29.64	35.203	37.9129	38.3868	37.657	37.7302	37.431	29.64	35.203	37.9129	38.3868	37.5471	36.9901	36.5967		29.64	30.1824	36.418	36.8058	35.967	35.3712	29.64	32.5933	36.4303	37.7241	36.9594	36.2205	29.64	32.5933	36.4303	37.6448	37.223	37.1862	36.3316	29.64	32.5933	36.4303	37.6448	37.0269	36.2576	37.2046	36.6767	29.64	33.4193
29.68	35.8989	37.3271	37.2414	37.1188	36.5043	29.68	35.122	37.919	38.3504	37.8886	37.7545	37.431	29.68	35.122	37.919	38.3504	37.5959	37.0637	36.6952		29.68	30.2606	36.4735	36.8058	36.0103	35.4085	29.68	32.6826	36.2823	37.7789	37.0269	36.2205	29.68	32.6826	36.2823	37.6936	37.3148	37.223	36.418	29.68	32.6826	36.2823	37.6936	37.1005	36.2205	37.223	36.6459	29.68	33.47
29.72	35.9175	37.2903	37.2414	37.0943	36.5166	29.72	35.1345	37.8216	38.3444	37.8277	37.7606	37.4555	29.72	35.1345	37.8216	38.3444	37.5898	37.0514	36.8427		29.72	30.2736	36.4797	36.8304	35.9979	35.4085	29.72	32.6762	36.3625	37.8033	37.033	36.1464	29.72	32.6762	36.3625	37.7058	37.2842	37.223	36.4303	29.72	32.6762	36.3625	37.7058	37.0759	36.2267	37.2291	36.6336	29.72	33.4889
29.76	35.936	37.2597	37.2536	37.1005	36.609	29.76	35.203	37.8216	38.3444	37.7972	37.7606	37.4432	29.76	35.203	37.8216	38.3444	37.5715	37.0759	36.8243		29.76	30.2866	36.4488	36.812	35.9979	35.4147	29.76	32.6762	36.3131	37.7911	37.0453	36.1464	29.76	32.6762	36.3131	37.7302	37.2536	37.2291	36.2761	29.76	32.6762	36.3131	37.7302	37.0943	36.1773	37.2659	36.689	29.76	33.4889
29.8	35.936	37.2536	37.4066	37.1556	36.6152	29.8	35.1843	37.8399	38.3807	37.8642	37.7728	37.4738	29.8	35.1843	37.8399	38.3807	37.5959	37.0698	36.7628		29.8	30.2085	36.4057	36.8427	35.9856	35.4956	29.8	32.6762	36.3316	37.8155	37.0759	36.1526	29.8	32.6762	36.3316	37.657	37.272	37.2291	36.4858	29.8	32.6762	36.3316	37.657	37.1372	36.1896	37.2842	36.6952	29.8	33.4826
29.84	35.9175	37.2903	37.376	37.174	36.5536	29.84	35.1781	37.8886	38.3686	37.7667	37.785	37.4799	29.84	35.1781	37.8886	38.3686	37.6021	37.0882	36.8427		29.84	30.1824	36.4242	36.8427	36.0041	35.4831	29.84	32.7972	36.307	37.7302	37.033	36.1649	29.84	32.7972	36.307	37.718	37.2291	37.2781	36.4488	29.84	32.7972	36.307	37.718	37.1188	36.2267	37.2903	36.7259	29.84	33.5079
29.88	35.8493	37.5288	37.3638	37.2046	36.5474	29.88	35.2466	37.9312	38.5019	37.7667	37.785	37.4921	29.88	35.2466	37.9312	38.5019	37.6631	37.0759	36.7997		29.88	30.2215	36.4427	36.8304	36.0041	35.4645	29.88	32.7909	36.3316	37.6997	37.0821	36.1896	29.88	32.7909	36.3316	37.7241	37.2659	37.2659	36.455	29.88	32.7909	36.3316	37.7241	37.125	36.2884	37.2291	36.6706	29.88	33.4636
29.92	35.9051	37.5043	37.4432	37.1924	36.5659	29.92	35.1282	37.9555	38.5746	37.785	37.7911	37.5471	29.92	35.1282	37.9555	38.5746	37.6326	37.0882	36.8489		29.92	30.2866	36.4735	36.8243	36.0227	35.4334	29.92	32.7336	36.3563	37.7119	37.0882	36.2143	29.92	32.7336	36.3563	37.7424	37.3148	37.272	36.418	29.92	32.7336	36.3563	37.7424	37.125	36.2884	37.223	36.6829	29.92	33.5142
29.96	35.8555	37.4799	37.4188	37.1862	36.6213	29.96	35.1656	38.0529	38.5686	37.7606	37.8277	37.5532	29.96	35.1656	38.0529	38.5686	37.657	37.1188	36.7013		29.96	30.3257	36.5228	36.8181	36.0289	35.4209	29.96	32.7527	36.3872	37.7728	37.1495	36.2267	29.96	32.7527	36.3872	37.7485	37.3148	37.2781	36.455	29.96	32.7527	36.3872	37.7485	37.1556	36.307	37.2597	36.7136	29.96	33.5775
30	35.8927	37.4677	37.4432	37.2169	36.5536	30	35.1532	38.0529	38.5867	37.7728	37.8033	37.5227	30	35.1532	38.0529	38.5867	37.7545	37.1005	36.7935		30	30.3257	36.492	36.8181	36.0536	35.452	30	32.7654	36.3995	37.7545	37.1372	36.2391	30	32.7654	36.3995	37.7058	37.3209	37.2414	36.4365	30	32.7654	36.3995	37.7058	37.1495	36.3378	37.2414	36.7382	30	33.628
30.04	35.936	37.4982	37.486	37.2169	36.5721	30.04	35.1469	38.0893	38.5625	37.9068	37.7911	37.5227	30.04	35.1469	38.0893	38.5625	37.7545	37.0882	36.7935		30.04	30.3127	36.4612	36.855	35.9979	35.4458	30.04	32.7781	36.4118	37.7545	37.1066	36.2205	30.04	32.7781	36.4118	37.7485	37.3699	37.2352	36.455	30.04	32.7781	36.4118	37.7485	37.1495	36.3255	37.272	36.7751	30.04	33.4826
30.08	35.9175	37.4432	37.431	37.1862	36.5659	30.08	35.1843	38.065	38.5141	37.8094	37.8033	37.5349	30.08	35.1843	38.065	38.5141	37.7545	37.0759	36.7935		30.08	30.2801	36.4981	36.8304	35.9608	35.4583	30.08	32.7972	36.4981	37.9008	37.1311	36.2329	30.08	32.7972	36.4981	37.7119	37.4004	37.1924	36.4797	30.08	32.7972	36.4981	37.7119	37.1862	36.3378	37.2108	36.7935	30.08	33.5585
30.12	35.8679	37.4799	37.3515	37.2169	36.6459	30.12	35.1781	38.0407	38.5019	37.8094	37.7424	37.5227	30.12	35.1781	38.0407	38.5019	37.7363	37.1495	36.9655		30.12	30.2866	36.5413	36.8366	36.0041	35.4769	30.12	32.7972	36.492	37.8703	37.1617	36.2205	30.12	32.7972	36.492	37.7302	37.376	37.2842	36.4981	30.12	32.7972	36.492	37.7302	37.1985	36.3748	37.2352	36.769	30.12	33.5332
30.2	35.8865	37.4004	37.3943	37.2536	36.6398	30.2	35.2093	38.0103	38.4838	37.919	37.785	37.5959	30.2	35.2093	38.0103	38.4838	37.7728	37.1862	36.9717		30.2	30.1433	36.5228	36.8611	36.0536	35.4831	30.2	32.7272	36.5351	37.8642	37.1495	36.2143	30.2	32.7272	36.5351	37.7302	37.3821	37.272	36.5228	30.2	32.7272	36.5351	37.7302	37.1311	36.3933	37.272	36.769	30.2	33.5332
30.24	35.8183	37.4371	37.4249	37.2169	36.6829	30.24	35.1843	38.0893	38.5564	37.8947	37.785	37.6082	30.24	35.1843	38.0893	38.5564	37.7728	37.1495	36.8796		30.24	30.228	36.5782	36.9348	36.0907	35.4831	30.24	32.7272	36.5228	37.852	37.1862	36.2143	30.24	32.7272	36.5228	37.7302	37.3515	37.3332	36.529	30.24	32.7272	36.5228	37.7302	37.2169	36.3995	37.272	36.7813	30.24	33.5522
30.28	35.9051	37.4066	37.4432	37.2291	36.6398	30.28	35.2778	38.1015	38.5504	37.9008	37.8094	37.6204	30.28	35.2778	38.1015	38.5504	37.8033	37.1801	36.898		30.28	30.228	36.609	36.9655	36.0845	35.5142	30.28	32.7081	36.5844	37.8886	37.1985	36.1835	30.28	32.7081	36.5844	37.6814	37.3454	37.4127	36.5166	30.28	32.7081	36.5844	37.6814	37.2291	36.3933	37.2965	36.7874	30.28	33.5964
30.32	35.8741	37.4494	37.431	37.2046	36.6459	30.32	35.2902	38.0954	38.5201	37.852	37.8399	37.5837	30.32	35.2902	38.0954	38.5201	37.7789	37.2169	36.898		30.32	30.215	36.5782	36.9655	36.1155	35.5328	30.32	32.7144	36.5351	37.9129	37.1679	36.1711	30.32	32.7144	36.5351	37.8764	37.3393	37.3821	36.6152	30.32	32.7144	36.5351	37.8764	37.376	36.3687	37.2965	36.7813	30.32	33.5964
30.36	35.8617	37.4555	37.4799	37.2169	36.6521	30.36	35.2404	37.986	38.5262	37.8459	37.8886	37.5898	30.36	35.2404	37.986	38.5262	37.7911	37.2108	36.9287		30.36	30.2671	36.5844	36.9287	36.1093	35.4707	30.36	32.6698	36.6275	37.8642	37.1434	36.1155	30.36	32.6698	36.6275	37.8216	37.3943	37.3638	36.7136	30.36	32.6698	36.6275	37.8216	37.4066	36.3995	37.3332	36.7935	30.36	33.6217
30.4	35.8121	37.4616	37.5043	37.1985	36.6521	30.4	35.2466	38.0164	38.5141	37.8277	37.9129	37.5654	30.4	35.2466	38.0164	38.5141	37.8581	37.1801	36.9103		30.4	30.2085	36.5659	36.9532	36.1402	35.4645	30.4	32.8036	36.5105	37.852	37.1434	36.1526	30.4	32.8036	36.5105	37.8277	37.3638	37.3515	36.6521	30.4	32.8036	36.5105	37.8277	37.3638	36.4057	37.376	36.8489	30.4	33.6154
30.44	35.8121	37.4555	37.541	37.2475	36.6336	30.44	35.284	38.1258	38.5867	37.9129	37.9008	37.5349	30.44	35.284	38.1258	38.5867	37.8642	37.2046	36.9532		30.44	30.1759	36.6029	36.941	36.1217	35.5391	30.44	32.8291	36.609	37.8947	37.223	36.1958	30.44	32.8291	36.609	37.7606	37.376	37.4004	36.6767	30.44	32.8291	36.609	37.7606	37.3393	36.3872	37.3515	36.8304	30.44	33.6154
30.48	35.8121	37.4371	37.6082	37.2291	36.6706	30.48	35.2653	38.1501	38.5746	37.9008	37.9008	37.5837	30.48	35.2653	38.1501	38.5746	37.8459	37.2291	36.9471		30.48	30.1954	36.5413	36.941	36.1155	35.5266	30.48	32.8418	36.5967	37.8886	37.2597	36.2823	30.48	32.8418	36.5967	37.785	37.3821	37.4127	36.5782	30.48	32.8418	36.5967	37.785	37.3332	36.3625	37.3821	36.8058	30.48	33.5964
30.52	35.8741	37.486	37.6326	37.2903	36.6644	30.52	35.3525	38.1015	38.623	38.0042	37.9495	37.6326	30.52	35.3525	38.1015	38.623	37.9008	37.2291	36.8611		30.52	30.2085	36.529	37.0207	36.1155	35.5639	30.52	32.7781	36.5967	37.8399	37.2536	36.2699	30.52	32.7781	36.5967	37.7972	37.5043	37.4799	36.7198	30.52	32.7781	36.5967	37.7972	37.3943	36.4488	37.4371	36.7567	30.52	33.6154
30.56	36.0041	37.5105	37.5654	37.3087	36.7136	30.56	35.3152	38.1805	38.6351	38.0893	37.9616	37.6082	30.56	35.3152	38.1805	38.6351	38.0285	37.2414	36.9962		30.56	30.1824	36.529	37.0085	36.134	35.5577	30.56	32.81	36.6459	37.9616	37.223	36.2946	30.56	32.81	36.6459	37.8338	37.541	37.4677	36.689	30.56	32.81	36.6459	37.8338	37.3638	36.5105	37.431	36.7997	30.56	33.5964
30.6	36.0227	37.5043	37.5776	37.3087	36.7198	30.6	35.1282	38.2108	38.6533	38.0346	38.0589	37.6509	30.6	35.1282	38.2108	38.6533	37.9312	37.3576	37.033		30.6	30.2215	36.529	37.0207	36.202	35.5328	30.6	32.7781	36.6336	37.9068	37.3087	36.2946	30.6	32.7781	36.6336	37.8277	37.5837	37.431	36.6521	30.6	32.7781	36.6336	37.8277	37.3454	36.4981	37.4127	36.8611	30.6	33.6091
30.64	36.0041	37.5105	37.5105	37.2659	36.5905	30.64	35.1843	38.1744	38.6412	38.0285	37.992	37.6814	30.64	35.1843	38.1744	38.6412	37.9616	37.3271	36.9471		30.64	30.241	36.5659	37.0207	36.1958	35.5266	30.64	32.759	36.6275	37.9068	37.3026	36.3008	30.64	32.759	36.6275	37.852	37.5349	37.4799	36.6644	30.64	32.759	36.6275	37.852	37.4127	36.4797	37.3576	36.855	30.64	33.5901
30.68	35.936	37.486	37.5593	37.2903	36.6213	30.68	35.1906	38.1258	38.7621	38.065	37.9312	37.7058	30.68	35.1906	38.1258	38.7621	37.9555	37.3026	36.9594		30.68	30.241	36.5597	37.1617	36.2391	35.5701	30.68	32.7463	36.5844	37.9677	37.2475	36.307	30.68	32.7463	36.5844	37.8155	37.5532	37.3943	36.6275	30.68	32.7463	36.5844	37.8155	37.4249	36.4612	37.3699	36.9041	30.68	33.5838
30.72	35.8741	37.5105	37.5288	37.2842	36.5782	30.72	35.1843	38.1744	38.7561	38.0893	37.992	37.6814	30.72	35.1843	38.1744	38.7561	37.9068	37.3209	36.9717		30.72	30.241	36.5659	37.1679	36.2082	35.5577	30.72	32.8227	36.5597	37.9799	37.223	36.3316	30.72	32.8227	36.5597	37.8216	37.5471	37.4738	36.6029	30.72	32.8227	36.5597	37.8216	37.4494	36.4673	37.4127	36.8857	30.72	33.5964
30.76	35.9298	37.4921	37.6143	37.3271	36.5659	30.76	35.1968	38.2412	38.6896	38.0407	37.992	37.6753	30.76	35.1968	38.2412	38.6896	37.9129	37.3454	36.9103		30.76	30.1759	36.5597	37.0575	36.1711	35.5763	30.76	32.7972	36.5413	38.0042	37.2291	36.3625	30.76	32.7972	36.5413	37.852	37.5471	37.5105	36.6275	30.76	32.7972	36.5413	37.852	37.4982	36.4673	37.4616	36.9041	30.76	33.6091
30.8	35.9113	37.5105	37.6509	37.4738	36.6767	30.8	35.2778	38.2108	38.7923	38.138	38.0103	37.6753	30.8	35.2778	38.2108	38.7923	37.9555	37.3209	36.9287		30.8	30.1759	36.5536	37.033	36.1278	35.5328	30.8	32.81	36.5166	37.9555	37.2291	36.4365	30.8	32.81	36.5166	37.8642	37.6204	37.4921	36.6213	30.8	32.81	36.5166	37.8642	37.4494	36.4427	37.4004	36.9471	30.8	33.6596
30.84	35.9422	37.4982	37.6143	37.4677	36.7136	30.84	35.2653	38.2412	38.7017	38.1562	38.0042	37.7302	30.84	35.2653	38.2412	38.7017	37.919	37.3087	36.9103		30.84	30.2019	36.5413	37.033	36.1896	35.6571	30.84	32.8036	36.5105	37.9677	37.272	36.4118	30.84	32.8036	36.5105	37.8703	37.6326	37.486	36.5967	30.84	32.8036	36.5105	37.8703	37.4494	36.4735	37.5043	36.9532	30.84	33.6533
30.88	35.9051	37.4921	37.5898	37.3882	36.7321	30.88	35.2653	38.2837	38.7923	38.1076	38.0042	37.7302	30.88	35.2653	38.2837	38.7923	37.9373	37.3087	37.0146		30.88	30.1759	36.5228	37.0391	36.1711	35.6633	30.88	32.8927	36.5166	37.986	37.2965	36.4057	30.88	32.8927	36.5166	37.8825	37.6082	37.4799	36.6275	30.88	32.8927	36.5166	37.8825	37.3638	36.5105	37.486	36.9901	30.88	33.6722
30.92	35.9051	37.5837	37.6082	37.4066	36.7505	30.92	35.2653	38.3383	38.7742	38.1501	37.9616	37.7302	30.92	35.2653	38.3383	38.7742	37.9799	37.2781	36.941		30.92	30.2085	36.5228	37.0514	36.2267	35.6695	30.92	32.8545	36.5043	37.9373	37.3943	36.344	30.92	32.8545	36.5043	37.9555	37.5898	37.5349	36.6706	30.92	32.8545	36.5043	37.9555	37.3821	36.5105	37.4982	37.0391	30.92	33.6596
31	35.8369	37.5776	37.6448	37.3882	36.7935	31	35.2155	38.2776	38.8407	38.1319	37.9555	37.7119	31	35.2155	38.2776	38.8407	37.9251	37.2842	36.9348		31	30.228	36.5043	37.0391	36.2452	35.6695	31	32.7781	36.6029	37.9312	37.4127	36.3316	31	32.7781	36.6029	37.9434	37.5593	37.5166	36.689	31	32.7781	36.6029	37.9434	37.4616	36.5844	37.4982	37.0269	31	33.6407
31.04	35.8803	37.5471	37.5776	37.3576	36.769	31.04	35.1532	38.3504	38.8044	38.1623	37.986	37.7302	31.04	35.1532	38.3504	38.8044	37.9738	37.3515	37.0085		31.04	30.2019	36.5536	37.0759	36.2638	35.7067	31.04	32.81	36.6275	37.9008	37.3209	36.3687	31.04	32.81	36.6275	37.9251	37.5471	37.5593	36.7997	31.04	32.81	36.6275	37.9251	37.4982	36.609	37.5105	36.9839	31.04	33.6596
31.08	35.8617	37.5532	37.5654	37.3454	36.8243	31.08	35.1906	38.3868	38.7923	38.1623	37.9555	37.7302	31.08	35.1906	38.3868	38.7923	37.9981	37.2903	36.8918		31.08	30.215	36.6275	37.0637	36.3193	35.6881	31.08	32.7654	36.5782	37.9616	37.3393	36.3502	31.08	32.7654	36.5782	37.9616	37.5715	37.5837	36.7997	31.08	32.7654	36.5782	37.9616	37.4799	36.5659	37.4799	36.9717	31.08	33.628
31.12	35.8617	37.5715	37.5471	37.3699	36.7935	31.12	35.2093	38.3504	38.8286	38.223	38.0042	37.7424	31.12	35.2093	38.3504	38.8286	38.0103	37.3332	36.9226		31.12	30.215	36.6336	37.0698	36.202	35.6446	31.12	32.8036	36.5905	37.992	37.3332	36.3687	31.12	32.8036	36.5905	37.9981	37.541	37.5654	36.7813	31.12	32.8036	36.5905	37.9981	37.5349	36.5474	37.5288	36.9778	31.12	33.6596
31.16	35.8927	37.5837	37.5349	37.4494	36.7813	31.16	35.2155	38.3201	38.7923	38.1866	37.9738	37.7363	31.16	35.2155	38.3201	38.7923	38.0164	37.4066	37.0085		31.16	30.228	36.6213	37.0391	36.2391	35.6571	31.16	32.7909	36.6336	37.992	37.3454	36.3748	31.16	32.7909	36.6336	37.9738	37.657	37.6021	36.7874	31.16	32.7909	36.6336	37.9738	37.5166	36.529	37.5166	36.9164	31.16	33.6343
31.2	35.8989	37.6021	37.6082	37.4555	36.7075	31.2	35.2466	38.2837	38.7984	38.1683	38.0285	37.7119	31.2	35.2466	38.2837	38.7984	38.0589	37.376	37.0514		31.2	30.1759	36.5474	37.0575	36.2452	35.6446	31.2	32.7272	36.6336	37.9981	37.3087	36.3748	31.2	32.7272	36.6336	37.9495	37.6509	37.6448	36.7813	31.2	32.7272	36.6336	37.9495	37.4616	36.5659	37.5227	36.9287	31.2	33.6343
31.24	35.8803	37.5959	37.6326	37.431	36.7259	31.24	35.2217	38.2776	38.8648	38.144	38.0346	37.6631	31.24	35.2217	38.2776	38.8648	38.138	37.3882	37.1311		31.24	30.1759	36.5782	37.0453	36.2391	35.6695	31.24	32.7399	36.5721	37.9616	37.3148	36.3748	31.24	32.7399	36.5721	37.9312	37.657	37.5898	36.7935	31.24	32.7399	36.5721	37.9312	37.5959	36.5721	37.5227	36.9655	31.24	33.6217
31.28	35.8307	37.5959	37.7545	37.3148	36.7136	31.28	35.2404	38.2655	38.8225	38.1319	38.0711	37.7606	31.28	35.2404	38.2655	38.8225	37.986	37.4249	37.0943		31.28	30.3127	36.5967	37.0698	36.2391	35.7067	31.28	32.759	36.6644	38.0225	37.3454	36.4057	31.28	32.759	36.6644	37.9738	37.6753	37.6082	36.855	31.28	32.759	36.6644	37.9738	37.6265	36.5536	37.5227	37.0146	31.28	33.6596
31.32	35.8431	37.5715	37.7363	37.4738	36.8058	31.32	35.203	38.3626	38.8648	38.1258	38.065	37.7545	31.32	35.203	38.3626	38.8648	38.0833	37.4188	37.0759		31.32	30.2736	36.5536	37.0882	36.2391	35.7687	31.32	32.6953	36.5905	37.992	37.3454	36.4427	31.32	32.6953	36.5905	37.9677	37.6875	37.6875	36.8058	31.32	32.6953	36.5905	37.9677	37.5043	36.5967	37.541	37.033	31.32	33.6659
31.36	35.8803	37.5532	37.8216	37.4921	36.7628	31.36	35.2716	38.3444	38.8044	38.2473	38.1076	37.7789	31.36	35.2716	38.3444	38.8044	38.0893	37.3699	37.0637		31.36	30.3192	36.5659	37.0759	36.2514	35.7129	31.36	32.7081	36.5659	38.0103	37.4249	36.492	31.36	32.7081	36.5659	37.986	37.6814	37.7302	36.7813	31.36	32.7081	36.5659	37.986	37.5105	36.5967	37.6143	37.1005	31.36	33.7228
31.4	35.8679	37.5593	37.8338	37.5105	36.7628	31.4	35.2404	38.4111	38.8044	38.1623	38.1076	37.8155	31.4	35.2404	38.4111	38.8044	38.1137	37.4004	37.1617		31.4	30.3127	36.5721	37.0943	36.2946	35.6881	31.4	32.7336	36.6029	37.9981	37.431	36.4981	31.4	32.7336	36.6029	37.992	37.6997	37.6997	36.7874	31.4	32.7336	36.6029	37.992	37.5043	36.5597	37.6448	37.0698	31.4	33.6722
31.44	35.9175	37.6143	37.8216	37.4738	36.8489	31.44	35.2591	38.3868	38.8648	38.1015	38.1319	37.8155	31.44	35.2591	38.3868	38.8648	38.2108	37.4555	37.1679		31.44	30.2801	36.5659	37.0821	36.2884	35.7811	31.44	32.7718	36.6582	38.0164	37.4066	36.4797	31.44	32.7718	36.6582	38.0103	37.6753	37.6631	36.769	31.44	32.7718	36.6582	38.0103	37.6326	36.5905	37.6387	37.0637	31.44	33.6975
31.48	35.9484	37.5837	37.7058	37.4127	36.898	31.48	35.284	38.3747	38.8588	38.1137	38.1744	37.8216	31.48	35.284	38.3747	38.8588	38.1623	37.5715	37.1617		31.48	30.2866	36.529	37.1005	36.2823	35.7439	31.48	32.7781	36.6459	38.0468	37.4188	36.4488	31.48	32.7781	36.6459	38.0407	37.718	37.6265	36.7567	31.48	32.7781	36.6459	38.0407	37.6387	36.6767	37.6936	37.0023	31.48	33.7291
31.52	35.9608	37.6021	37.785	37.4127	36.8673	31.52	35.2902	38.3504	38.8467	38.144	38.1744	37.8642	31.52	35.2902	38.3504	38.8467	38.223	37.5043	37.0943		31.52	30.2866	36.5536	37.0821	36.2761	35.7377	31.52	32.8291	36.6829	38.0103	37.4616	36.4858	31.52	32.8291	36.6829	38.0772	37.7241	37.6692	36.7505	31.52	32.8291	36.6829	38.0772	37.5776	36.6582	37.6326	37.0514	31.52	33.7922
31.56	35.9732	37.6265	37.6875	37.5166	36.9041	31.56	35.3027	38.405	38.889	38.1866	38.1987	37.8155	31.56	35.3027	38.405	38.889	38.1866	37.486	37.1005		31.56	30.2671	36.5905	37.1434	36.3008	35.7067	31.56	32.8227	36.7136	38.0225	37.4616	36.492	31.56	32.8227	36.7136	38.144	37.7424	37.6631	36.812	31.56	32.8227	36.7136	38.144	37.5593	36.689	37.657	37.0759	31.56	33.7922
31.6	35.9484	37.6204	37.8155	37.5166	36.7813	31.6	35.2965	38.3262	38.901	38.2655	38.2048	37.7972	31.6	35.2965	38.3262	38.901	38.1866	37.4677	37.1066		31.6	30.2085	36.5905	37.1372	36.3008	35.6446	31.6	32.8418	36.6952	38.0346	37.4432	36.4735	31.6	32.8418	36.6952	38.1258	37.8703	37.6753	36.9041	31.6	32.8418	36.6952	38.1258	37.5227	36.6829	37.6265	37.125	31.6	33.7985
31.64	35.9298	37.6265	37.8277	37.4982	36.8181	31.64	35.2902	38.3383	38.9976	38.2533	38.1987	37.8094	31.64	35.2902	38.3383	38.9976	38.3019	37.5715	37.1188		31.64	30.2671	36.5659	37.1679	36.3131	35.6633	31.64	32.8481	36.6829	38.0164	37.4494	36.455	31.64	32.8481	36.6829	38.0529	37.8703	37.6692	36.9041	31.64	32.8481	36.6829	38.0529	37.5471	36.689	37.6143	37.0821	31.64	33.7228
31.68	35.8989	37.6326	37.7545	37.5105	36.8611	31.68	35.2965	38.3747	38.9735	38.1926	38.1926	37.7485	31.68	35.2965	38.3747	38.9735	38.2837	37.5654	37.0698		31.68	30.4233	36.5536	37.125	36.307	35.626	31.68	32.7718	36.6706	38.0954	37.4799	36.4488	31.68	32.7718	36.6706	38.0529	37.7789	37.7241	36.8857	31.68	32.7718	36.6706	38.0529	37.5959	36.7013	37.6082	37.1127	31.68	33.6849
31.72	35.9236	37.6204	37.7119	37.5166	36.7935	31.72	35.3089	38.3747	38.9373	38.1744	38.1623	37.7363	31.72	35.3089	38.3747	38.9373	38.2655	37.5654	37.1617		31.72	30.4103	36.5413	37.1127	36.3193	35.6757	31.72	32.8545	36.6829	38.1015	37.4677	36.418	31.72	32.8545	36.6829	38.0468	37.785	37.6631	36.8734	31.72	32.8545	36.6829	38.0468	37.6143	36.6829	37.6814	37.1188	31.72	33.6722
31.76	36.0907	37.6692	37.8581	37.5593	36.8489	31.76	35.2716	38.3989	38.9373	38.1926	38.1926	37.7545	31.76	35.2716	38.3989	38.9373	38.2594	37.5715	37.1617		31.76	30.3582	36.6829	37.1188	36.3131	35.7191	31.76	32.8545	36.6459	38.1137	37.5166	36.4981	31.76	32.8545	36.6459	38.1197	37.7667	37.7911	36.8918	31.76	32.8545	36.6459	38.1197	37.6143	36.6029	37.6692	37.0698	31.76	33.6786
31.84	36.0969	37.7241	37.9555	37.6143	36.8427	31.84	35.2716	38.4898	38.895	38.1926	38.1744	37.8216	31.84	35.2716	38.4898	38.895	38.2898	37.6204	37.1005		31.84	30.3582	36.7321	37.125	36.3502	35.7501	31.84	32.7718	36.689	38.1015	37.4677	36.5043	31.84	32.7718	36.689	38.2594	37.7911	37.8338	36.9103	31.84	32.7718	36.689	38.2594	37.6326	36.6029	37.7911	37.1556	31.84	33.6975
31.88	36.0907	37.6814	37.8947	37.5898	36.7813	31.88	35.2342	38.4474	38.901	38.1987	38.2169	37.7972	31.88	35.2342	38.4474	38.901	38.2291	37.541	37.0943		31.88	30.3257	36.689	37.1679	36.3502	35.7811	31.88	32.9245	36.6644	38.1805	37.3699	36.4981	31.88	32.9245	36.6644	38.2291	37.8338	37.8155	36.8673	31.88	32.9245	36.6644	38.2291	37.6143	36.6582	37.7241	37.1005	31.88	33.7543
31.92	36.0227	37.6509	37.8642	37.6204	36.8366	31.92	35.2591	38.5201	38.9373	38.2291	38.223	37.8094	31.92	35.2591	38.5201	38.9373	38.2351	37.5288	37.1801		31.92	30.4623	36.6398	37.0943	36.418	35.7811	31.92	32.9245	36.7136	38.2048	37.431	36.5166	31.92	32.9245	36.7136	38.2291	37.6814	37.8216	36.7505	31.92	32.9245	36.7136	38.2291	37.6143	36.6706	37.7545	37.1188	31.92	33.7733
31.96	36.0289	37.7058	37.8399	37.5837	36.8304	31.96	35.284	38.4959	38.9554	38.2594	38.1926	37.8399	31.96	35.284	38.4959	38.9554	38.2169	37.541	37.2046		31.96	30.4298	36.6706	37.1434	36.4981	35.8307	31.96	32.8545	36.6952	38.1683	37.4616	36.5351	31.96	32.8545	36.6952	38.3929	37.7424	37.8033	36.9287	31.96	32.8545	36.6952	38.3929	37.5959	36.7136	37.7667	37.1188	31.96	33.7606
32	35.9113	37.7789	37.8399	37.6082	36.7628	32	35.2716	38.4717	38.9735	38.3322	38.2533	37.8338	32	35.2716	38.4717	38.9735	38.2412	37.5715	37.1679		32	30.4428	36.6644	37.1372	36.4858	35.7997	32	32.8354	36.769	38.1501	37.4799	36.529	32	32.8354	36.769	38.3504	37.7424	37.7302	36.941	32	32.8354	36.769	38.3504	37.7058	36.689	37.7119	37.1617	32	33.7606
32.04	35.9546	37.8155	37.8947	37.5715	36.7935	32.04	35.2965	38.4595	38.9493	38.2898	38.3019	37.8277	32.04	35.2965	38.4595	38.9493	38.2958	37.5898	37.1801		32.04	30.3907	36.6459	37.1556	36.4612	35.8183	32.04	32.9117	36.7874	38.1623	37.5105	36.5597	32.04	32.9117	36.7874	38.3201	37.7789	37.7972	36.7013	32.04	32.9117	36.7874	38.3201	37.7728	36.6952	37.7302	37.1617	32.04	33.767
32.08	36.0351	37.8033	37.8947	37.5715	36.8673	32.08	35.4085	38.4656	38.9855	38.3019	38.2533	37.8338	32.08	35.4085	38.4656	38.9855	38.2533	37.5776	37.125		32.08	30.2019	36.6521	37.1801	36.4797	35.8121	32.08	32.9817	36.7751	38.1926	37.5166	36.6029	32.08	32.9817	36.7751	38.2533	37.8033	37.7911	36.7751	32.08	32.9817	36.7751	38.2533	37.8094	36.6336	37.785	37.1924	32.08	33.767
32.12	36.0598	37.718	37.9555	37.5837	36.8489	32.12	35.3463	38.4474	38.9674	38.3565	38.1623	37.8277	32.12	35.3463	38.4474	38.9674	38.2898	37.4799	37.1434		32.12	30.2736	36.6459	37.2352	36.4303	35.8121	32.12	32.9499	36.7997	38.2169	37.5227	36.5967	32.12	32.9499	36.7997	38.2412	37.7911	37.7911	36.812	32.12	32.9499	36.7997	38.2412	37.7424	36.6275	37.7545	37.2046	32.12	33.748
32.16	36.0103	37.7424	37.8338	37.5837	36.9226	32.16	35.3898	38.5504	39.0036	38.3262	38.2169	37.8886	32.16	35.3898	38.5504	39.0036	38.3807	37.4799	37.1924		32.16	30.3192	36.6398	37.2536	36.4673	35.7501	32.16	32.8736	36.8796	38.2048	37.5227	36.5782	32.16	32.8736	36.8796	38.1805	37.8033	37.7911	36.898	32.16	32.8736	36.8796	38.1805	37.6753	36.7444	37.7119	37.174	32.16	33.7354
32.2	36.0165	37.7363	37.8581	37.486	36.8673	32.2	35.3774	38.5504	39.1001	38.3686	38.1866	37.852	32.2	35.3774	38.5504	39.1001	38.2655	37.4921	37.2536		32.2	30.3127	36.6582	37.2414	36.455	35.7377	32.2	32.8481	36.8857	38.1683	37.5654	36.6152	32.2	32.8481	36.8857	38.1623	37.8399	37.7911	36.9164	32.2	32.8481	36.8857	38.1623	37.6997	36.812	37.7424	37.1495	32.2	33.7228
32.24	36.0351	37.7545	37.8642	37.5593	36.8857	32.24	35.3836	38.508	39.0579	38.3383	38.2412	37.785	32.24	35.3836	38.508	39.0579	38.2776	37.5593	37.2291		32.24	30.1889	36.7321	37.272	36.455	35.8679	32.24	32.9181	36.8673	38.1926	37.5349	36.5905	32.24	32.9181	36.8673	38.144	37.852	37.8155	36.8734	32.24	32.9181	36.8673	38.144	37.6936	36.8734	37.6814	37.1311	32.24	33.7038
32.28	36.066	37.7667	37.852	37.541	36.8427	32.28	35.4334	38.4898	39.0941	38.3686	38.2351	37.8033	32.28	35.4334	38.4898	39.0941	38.308	37.5227	37.2352		32.28	30.2606	36.7259	37.2475	36.4303	35.7749	32.28	32.9181	36.941	38.2291	37.5227	36.6521	32.28	32.9181	36.941	38.1683	37.8459	37.8094	36.8918	32.28	32.9181	36.941	38.1683	37.7363	36.855	37.6265	37.125	32.28	33.6912
32.32	36.0784	37.7789	37.8399	37.5593	36.9103	32.32	35.3027	38.5019	39.088	38.3686	38.2533	37.8825	32.32	35.3027	38.5019	39.088	38.3504	37.5227	37.2352		32.32	30.2736	36.7567	37.2597	36.4303	35.7501	32.32	32.8927	36.9226	38.2715	37.541	36.5597	32.32	32.8927	36.9226	38.1683	37.9129	37.7545	36.8673	32.32	32.8927	36.9226	38.1683	37.7545	36.8427	37.6265	37.1924	32.32	33.6217
32.36	36.0907	37.7667	37.8033	37.6021	36.9655	32.36	35.3152	38.4474	39.1603	38.4232	38.1987	37.8764	32.36	35.3152	38.4474	39.1603	38.2655	37.4921	37.174		32.36	30.2671	36.7382	37.2536	36.455	35.7749	32.36	32.9626	36.8611	38.3262	37.6143	36.6521	32.36	32.9626	36.8611	38.3322	37.9008	37.7363	36.8796	32.36	32.9626	36.8611	38.3322	37.785	36.8427	37.7058	37.1985	32.36	33.6659
32.4	36.0907	37.7606	37.8642	37.5837	36.8918	32.4	35.3898	38.4414	39.2507	38.4535	38.2412	37.8947	32.4	35.3898	38.4414	39.2507	38.2594	37.486	37.2352		32.4	30.3322	36.7567	37.2659	36.4735	35.7191	32.4	32.9372	36.8857	38.3444	37.5898	36.7321	32.4	32.9372	36.8857	38.3504	37.919	37.8459	36.9471	32.4	32.9372	36.8857	38.3504	37.7789	36.8489	37.7485	37.1801	32.4	33.7922
32.44	36.2205	37.7667	37.8216	37.541	36.8796	32.44	35.3214	38.4959	39.2266	38.3747	38.2533	37.9008	32.44	35.3214	38.4959	39.2266	38.2898	37.486	37.2597		32.44	30.3907	36.6829	37.272	36.455	35.7873	32.44	32.9753	36.9839	38.314	37.6265	36.7259	32.44	32.9753	36.9839	38.314	37.919	37.8033	36.9839	32.44	32.9753	36.9839	38.314	37.785	36.8366	37.7363	37.1924	32.44	33.83
32.48	36.1155	37.8033	37.852	37.5837	36.8918	32.48	35.34	38.5564	39.2145	38.3868	38.2169	37.9068	32.48	35.34	38.5564	39.2145	38.3504	37.4921	37.1434		32.48	30.4233	36.7259	37.3393	36.5967	35.7935	32.48	33.0007	36.9103	38.308	37.657	36.7198	32.48	33.0007	36.9103	38.2715	37.9312	37.7667	37.0146	32.48	33.0007	36.9103	38.2715	37.7545	36.8734	37.7911	37.1679	32.48	33.8237
32.52	36.1526	37.8033	37.8825	37.4921	36.8673	32.52	35.3649	38.5746	39.2145	38.3989	38.2473	37.8216	32.52	35.3649	38.5746	39.2145	38.3262	37.4066	37.2414		32.52	30.4493	36.6644	37.2781	36.5351	35.8617	32.52	32.9626	36.9041	38.314	37.6448	36.7013	32.52	32.9626	36.9041	38.2473	37.9373	37.8155	36.9901	32.52	32.9626	36.9041	38.2473	37.718	36.8857	37.8338	37.1985	32.52	33.8364
32.56	36.1278	37.7972	37.8581	37.5288	36.8673	32.56	35.3338	38.4838	39.2145	38.4656	38.2473	37.8642	32.56	35.3338	38.4838	39.2145	38.3989	37.5227	37.2108		32.56	30.4038	36.6582	37.2903	36.4858	35.8927	32.56	32.9626	36.9164	38.308	37.5471	36.7751	32.56	32.9626	36.9164	38.2655	37.9373	37.8338	36.9594	32.56	32.9626	36.9164	38.2655	37.6692	36.8243	37.8033	37.2965	32.56	33.849
32.6	36.0845	37.7789	37.8947	37.6021	36.898	32.6	35.3712	38.4535	39.2025	38.3807	38.1987	37.8642	32.6	35.3712	38.4535	39.2025	38.3565	37.5288	37.2352		32.6	30.4428	36.6767	37.3148	36.4858	35.8307	32.6	33.0325	36.9594	38.314	37.6997	36.7567	32.6	33.0325	36.9594	38.3019	37.8886	37.785	36.8918	32.6	33.0325	36.9594	38.3019	37.7972	36.8427	37.785	37.2352	32.6	33.8048
32.68	36.0784	37.7728	37.9555	37.6387	37.0085	32.68	35.3276	38.508	39.2085	38.3626	38.2473	37.9068	32.68	35.3276	38.508	39.2085	38.2958	37.5288	37.223		32.68	30.4688	36.6767	37.3271	36.5659	35.8369	32.68	32.9563	36.9717	38.3626	37.7119	36.7751	32.68	32.9563	36.9717	38.3262	37.8947	37.7241	36.898	32.68	32.9563	36.9717	38.3262	37.785	36.8611	37.8216	37.3087	32.68	33.7796
32.72	36.1155	37.7972	37.919	37.657	37.0023	32.72	35.3027	38.6956	39.2145	38.6412	38.3201	37.9068	32.72	35.3027	38.6956	39.2145	38.3383	37.5898	37.3148		32.72	30.4948	36.7382	37.3882	36.4612	35.8183	32.72	32.9499	37.0085	38.4292	37.6753	36.769	32.72	32.9499	37.0085	38.2837	37.8764	37.7606	36.941	32.72	32.9499	37.0085	38.2837	37.7667	36.8857	37.8338	37.2291	32.72	33.8048
32.76	36.0969	37.7545	37.9738	37.6753	37.0453	32.76	35.3089	38.6775	39.2266	38.5746	38.3262	37.9008	32.76	35.3089	38.6775	39.2266	38.2351	37.5837	37.2659		32.76	30.4038	36.7997	37.3699	36.5413	35.8679	32.76	32.9372	36.9839	38.4292	37.6387	36.6767	32.76	32.9372	36.9839	38.2898	37.8947	37.7606	36.9348	32.76	32.9372	36.9839	38.2898	37.7606	36.8243	37.8155	37.1311	32.76	33.83
32.8	36.1526	37.7424	37.9738	37.6204	37.0146	32.8	35.3214	38.6714	39.2145	38.508	38.2958	37.9008	32.8	35.3214	38.6714	39.2145	38.3201	37.5959	37.2903		32.8	30.4688	36.7813	37.3515	36.6459	35.8183	32.8	32.9372	36.9655	38.3807	37.6326	36.7136	32.8	32.9372	36.9655	38.3686	37.9677	37.7241	36.9226	32.8	32.9372	36.9655	38.3686	37.6448	36.898	37.8216	37.125	32.8	33.8111
32.84	36.1278	37.785	37.9251	37.6082	36.9717	32.84	35.4023	38.6049	39.1664	38.3322	38.2473	37.8886	32.84	35.4023	38.6049	39.1664	38.3504	37.5837	37.2597		32.84	30.4818	36.7505	37.3576	36.6213	35.8555	32.84	32.9245	37.0575	38.4111	37.6265	36.6459	32.84	32.9245	37.0575	38.3322	37.9738	37.7058	36.9471	32.84	32.9245	37.0575	38.3322	37.6875	36.9532	37.8155	37.0698	32.84	33.8237
32.88	36.1958	37.7667	37.9008	37.6143	36.9103	32.88	35.3961	38.6412	39.1784	38.3747	38.2655	37.919	32.88	35.3961	38.6412	39.1784	38.3262	37.5898	37.2597		32.88	30.5273	36.8058	37.376	36.6336	35.967	32.88	32.9435	37.0085	38.4414	37.6082	36.7013	32.88	32.9435	37.0085	38.2958	38.0042	37.785	36.9287	32.88	32.9435	37.0085	38.2958	37.7119	36.9348	37.7972	37.0821	32.88	33.8048
32.92	36.1464	37.8094	37.8581	37.7119	36.9655	32.92	35.3463	38.6714	39.2386	38.3444	38.2715	37.9312	32.92	35.3463	38.6714	39.2386	38.314	37.5959	37.3638		32.92	30.4818	36.7628	37.3576	36.6952	35.9608	32.92	32.9626	36.9962	38.4474	37.6265	36.6829	32.92	32.9626	36.9962	38.2958	37.9251	37.7911	36.9532	32.92	32.9626	36.9962	38.2958	37.7302	36.9164	37.7119	37.0882	32.92	33.7922
32.96	36.1587	37.8033	37.9434	37.6753	36.9287	32.96	35.4147	38.7017	39.2085	38.4535	38.2837	37.9251	32.96	35.4147	38.7017	39.2085	38.3322	37.5776	37.3882		32.96	30.4948	36.7628	37.3576	36.6952	35.9236	32.96	32.9944	37.0943	38.4292	37.6204	36.7567	32.96	32.9944	37.0943	38.3019	37.9373	37.7485	36.941	32.96	32.9944	37.0943	38.3019	37.7789	36.8427	37.7789	37.0821	32.96	33.8427
33	36.1155	37.8216	37.9738	37.718	36.9717	33	35.3898	38.7742	39.2145	38.4656	38.3019	37.9008	33	35.3898	38.7742	39.2145	38.3201	37.5837	37.3209		33	30.5013	36.7997	37.223	36.6459	35.8803	33	32.988	37.0882	38.4171	37.6631	36.7813	33	32.988	37.0882	38.2958	37.9068	37.7545	36.9348	33	32.988	37.0882	38.2958	37.6936	36.8489	37.8094	37.0882	33	33.8048
33.04	36.0907	37.8459	37.9373	37.7302	36.9655	33.04	35.5391	38.7017	39.2085	38.4898	38.3444	37.8947	33.04	35.5391	38.7017	39.2085	38.2715	37.5898	37.3209		33.04	30.5273	36.9348	37.3454	36.6644	36.0103	33.04	33.0579	37.0023	38.3868	37.6387	36.7567	33.04	33.0579	37.0023	38.2473	37.9373	37.8033	36.8857	33.04	33.0579	37.0023	38.2473	37.7911	36.8489	37.8338	37.1188	33.04	33.8048
33.08	36.1464	37.8399	37.919	37.6997	37.0391	33.08	35.3027	38.7138	39.1724	38.5322	38.3626	37.9373	33.08	35.3027	38.7138	39.1724	38.3504	37.5837	37.3026		33.08	30.5338	36.8611	37.3332	36.6952	36.0165	33.08	32.988	36.9778	38.3565	37.657	36.7567	33.08	32.988	36.9778	38.2473	37.9434	37.7667	36.9839	33.08	32.988	36.9778	38.2473	37.7911	36.9164	37.8338	37.0943	33.08	33.8868
33.12	36.1835	37.8459	37.9555	37.6692	37.0023	33.12	35.3712	38.7198	39.2386	38.5201	38.3201	37.9068	33.12	35.3712	38.7198	39.2386	38.4292	37.5654	37.2475		33.12	30.4818	36.7935	37.4066	36.6398	35.9608	33.12	32.988	36.9348	38.4353	37.6509	36.7259	33.12	32.988	36.9348	38.3989	37.9434	37.7485	36.8058	33.12	32.988	36.9348	38.3989	37.7911	36.898	37.8277	37.174	33.12	33.8553
33.16	36.1649	37.9129	37.9434	37.6631	36.9901	33.16	35.3712	38.6472	39.2507	38.4898	38.4292	37.9555	33.16	35.3712	38.6472	39.2507	38.3929	37.5898	37.3271		33.16	30.4948	36.8611	37.3576	36.6275	35.967	33.16	33.0643	36.9471	38.4414	37.6692	36.7198	33.16	33.0643	36.9471	38.4111	37.9373	37.7424	36.8673	33.16	33.0643	36.9471	38.4111	37.7606	36.9041	37.8216	37.1985	33.16	33.8805
33.2	36.1711	37.8216	37.9129	37.6448	36.9778	33.2	35.4209	38.6835	39.2807	38.4171	38.3383	38.0164	33.2	35.4209	38.6835	39.2807	38.3444	37.5349	37.3638		33.2	30.5143	36.8796	37.3821	36.6275	35.9175	33.2	33.077	37.0207	38.3626	37.7241	36.6767	33.2	33.077	37.0207	38.405	37.9312	37.8155	36.898	33.2	33.077	37.0207	38.405	37.7545	36.8734	37.785	37.1924	33.2	33.849
33.24	36.1402	37.8033	37.9434	37.6326	37.0269	33.24	35.4085	38.75	39.2687	38.405	38.3565	37.9616	33.24	35.4085	38.75	39.2687	38.314	37.5654	37.3026		33.24	30.4493	36.8611	37.3943	36.6336	35.8989	33.24	33.0389	37.0514	38.3444	37.6814	36.7935	33.24	33.0389	37.0514	38.3444	37.9129	37.8581	36.9041	33.24	33.0389	37.0514	38.3444	37.7789	36.9471	37.7972	37.2536	33.24	33.8868
33.28	36.1464	37.7789	37.919	37.5471	37.0023	33.28	35.5639	38.7984	39.2386	38.4111	38.314	37.9981	33.28	35.5639	38.7984	39.2386	38.3019	37.6265	37.2903		33.28	30.4883	36.9041	37.431	36.6213	35.9298	33.28	33.1341	37.0269	38.3747	37.6875	36.7813	33.28	33.1341	37.0269	38.3383	37.9008	37.852	36.898	33.28	33.1341	37.0269	38.3383	37.6753	36.9103	37.7972	37.2108	33.28	33.8553
33.32	36.1896	37.8094	37.9312	37.6021	36.9962	33.32	35.5701	38.7802	39.2627	38.4292	38.3019	37.9981	33.32	35.5701	38.7802	39.2627	38.308	37.6753	37.3576		33.32	30.4818	36.8796	37.4555	36.6767	35.9298	33.32	33.1404	37.1617	38.4414	37.6753	36.7813	33.32	33.1404	37.1617	38.4111	37.9373	37.8825	36.941	33.32	33.1404	37.1617	38.4111	37.6387	36.9103	37.7728	37.2108	33.32	33.7417
33.36	36.2452	37.8703	37.9251	37.6204	37.0269	33.36	35.4583	38.8467	39.2627	38.4414	38.3686	37.9738	33.36	35.4583	38.8467	39.2627	38.3019	37.6753	37.3026		33.36	30.5078	36.8304	37.4432	36.6706	35.967	33.36	33.077	37.0514	38.4414	37.6692	36.8058	33.36	33.077	37.0514	38.3686	37.9068	37.8825	36.9594	33.36	33.077	37.0514	38.3686	37.6509	36.8611	37.7911	37.1801	33.36	33.7922
33.4	36.2576	37.8825	37.9677	37.657	36.9287	33.4	35.4956	38.7802	39.2868	38.3807	38.3807	37.9799	33.4	35.4956	38.7802	39.2868	38.3262	37.7119	37.3209		33.4	30.5338	36.9103	37.4677	36.6336	35.9113	33.4	33.1658	37.0759	38.4535	37.6875	36.7813	33.4	33.1658	37.0759	38.405	37.9312	37.8642	36.9655	33.4	33.1658	37.0759	38.405	37.718	36.898	37.8094	37.1434	33.4	33.8805
33.44	36.2884	37.9068	37.992	37.6753	36.8857	33.44	35.5266	38.6593	39.2446	38.3565	38.3686	37.9495	33.44	35.5266	38.6593	39.2446	38.3504	37.6692	37.3515		33.44	30.5273	36.8243	37.4432	36.6336	35.9113	33.44	33.1531	37.0637	38.4414	37.6936	36.769	33.44	33.1531	37.0637	38.3929	37.9434	37.9312	36.9655	33.44	33.1531	37.0637	38.3929	37.718	36.8857	37.7058	37.1985	33.44	33.8427
33.48	36.3255	37.9495	37.9555	37.6692	36.8857	33.48	35.5328	38.7198	39.2507	38.3565	38.3565	37.9616	33.48	35.5328	38.7198	39.2507	38.3444	37.657	37.3576		33.48	30.4818	36.8673	37.4616	36.6398	35.8741	33.48	33.1658	37.0943	38.4535	37.718	36.769	33.48	33.1658	37.0943	38.3929	37.9129	37.9434	36.9717	33.48	33.1658	37.0943	38.3929	37.718	36.8857	37.7302	37.2046	33.48	33.8364
33.56	36.3193	37.919	37.9373	37.6814	36.8673	33.56	35.5204	38.7379	39.2206	38.3929	38.3565	37.9555	33.56	35.5204	38.7379	39.2206	38.3807	37.6936	37.3148		33.56	30.5468	36.8611	37.4188	36.6029	35.8865	33.56	33.1785	37.1372	38.4595	37.7302	36.7751	33.56	33.1785	37.1372	38.3929	37.9373	37.9129	37.0146	33.56	33.1785	37.1372	38.3929	37.6875	36.9041	37.7302	37.2046	33.56	33.8868
33.6	36.3255	37.919	37.9312	37.6997	36.9348	33.6	35.4893	38.7923	39.2266	38.405	38.314	37.9799	33.6	35.4893	38.7923	39.2266	38.4111	37.6631	37.3026		33.6	30.5273	36.9041	37.4066	36.5782	35.9175	33.6	33.1024	37.125	38.4353	37.7606	36.7567	33.6	33.1024	37.125	38.4232	37.9616	37.8764	37.033	33.6	33.1024	37.125	38.4232	37.6448	36.898	37.8642	37.2108	33.6	33.9876
33.64	36.3255	37.8764	38.0346	37.7058	36.9962	33.64	35.5391	38.7984	39.2386	38.4595	38.3322	37.9555	33.64	35.5391	38.7984	39.2386	38.3989	37.718	37.2659		33.64	30.5403	36.8734	37.4066	36.609	35.8431	33.64	33.0325	37.1066	38.3626	37.9251	36.7505	33.64	33.0325	37.1066	38.3322	37.9373	37.8703	37.0453	33.64	33.0325	37.1066	38.3322	37.6753	36.9103	37.8459	37.1924	33.64	33.9624
33.68	36.3316	37.9251	37.9495	37.7728	36.9717	33.68	35.5701	38.7923	39.2446	38.4292	38.3686	38.0285	33.68	35.5701	38.7923	39.2446	38.4111	37.6692	37.3332		33.68	30.5013	36.9471	37.4494	36.6029	35.8369	33.68	33.1087	37.1127	38.3807	37.8277	36.7321	33.68	33.1087	37.1127	38.4292	38.0042	37.9434	37.0269	33.68	33.1087	37.1127	38.4292	37.6936	36.9287	37.8886	37.1801	33.68	33.8742
33.72	36.344	37.986	37.9799	37.7058	36.9532	33.72	35.6198	38.8225	39.1784	38.5564	38.3989	38.0225	33.72	35.6198	38.8225	39.1784	38.4111	37.7485	37.3393		33.72	30.5078	36.9164	37.4738	36.6459	35.8307	33.72	33.1595	37.1434	38.405	37.785	36.8489	33.72	33.1595	37.1434	38.405	37.9799	37.9738	37.0821	33.72	33.1595	37.1434	38.405	37.785	36.941	37.8216	37.1495	33.72	33.9057
33.76	36.307	37.9129	38.0103	37.6936	37.033	33.76	35.5639	38.7984	39.2085	38.5019	38.405	38.0285	33.76	35.5639	38.7984	39.2085	38.4111	37.6936	37.3454		33.76	30.4623	36.9348	37.4921	36.6582	35.8369	33.76	33.1849	37.1188	38.4474	37.7424	36.8243	33.76	33.1849	37.1188	38.3444	37.9373	37.9555	37.0269	33.76	33.1849	37.1188	38.3444	37.8033	36.9717	37.7972	37.1801	33.76	33.8805
33.8	36.2205	37.9495	37.9799	37.7363	37.033	33.8	35.6012	38.75	39.2085	38.4535	38.3868	38.0164	33.8	35.6012	38.75	39.2085	38.4474	37.6753	37.272		33.8	30.5078	36.9164	37.486	36.7567	35.8989	33.8	33.1912	37.0821	38.4535	37.6387	36.8058	33.8	33.1912	37.0821	38.4111	37.9251	37.9738	37.0269	33.8	33.1912	37.0821	38.4111	37.7545	36.9778	37.8277	37.1985	33.8	33.9057
33.84	36.418	37.986	38.1562	37.7058	37.0514	33.84	35.5453	38.9192	39.1844	38.4474	38.4353	37.9799	33.84	35.5453	38.9192	39.1844	38.405	37.7667	37.2475		33.84	30.5468	36.9962	37.5166	36.7567	35.8183	33.84	33.1785	37.1005	38.4535	37.6875	36.7382	33.84	33.1785	37.1005	38.4171	37.8155	37.9251	37.0146	33.84	33.1785	37.1005	38.4171	37.7667	36.9041	37.8399	37.1924	33.84	33.912
33.88	36.344	37.9312	38.0772	37.7911	37.0269	33.88	35.5453	38.889	39.2747	38.4777	38.4111	38.0103	33.88	35.5453	38.889	39.2747	38.4292	37.7606	37.2291		33.88	30.5143	36.9041	37.5898	36.689	35.8989	33.88	33.2039	37.0453	38.3807	37.6814	36.7935	33.88	33.2039	37.0453	38.2958	37.9495	37.9434	36.9103	33.88	33.2039	37.0453	38.2958	37.7058	36.9594	37.8825	37.2046	33.88	33.975
33.92	36.3995	37.9555	38.065	37.7302	37.0023	33.92	35.5825	38.8588	39.2567	38.4838	38.4111	37.9799	33.92	35.5825	38.8588	39.2567	38.3626	37.7545	37.2414		33.92	30.5727	36.812	37.5654	36.6582	35.9484	33.92	33.1849	36.9839	38.4414	37.7545	36.8058	33.92	33.1849	36.9839	38.4656	37.8886	37.9312	36.9471	33.92	33.1849	36.9839	38.4656	37.7302	36.9226	37.8399	37.174	33.92	33.9309
33.96	36.344	37.9677	38.0346	37.7789	36.9778	33.96	35.5888	38.8407	39.1904	38.4232	38.405	37.9738	33.96	35.5888	38.8407	39.1904	38.4232	37.7058	37.3209		33.96	30.5857	36.8673	37.4921	36.6398	35.9236	33.96	33.1214	36.9962	38.4353	37.8338	36.8918	33.96	33.1214	36.9962	38.4111	37.8399	37.9129	36.9164	33.96	33.1214	36.9962	38.4111	37.7606	36.9962	37.8094	37.2169	33.96	33.9687
34	36.381	37.9312	38.0529	37.785	36.9778	34	35.5515	38.9071	39.2085	38.5019	38.3989	37.9799	34	35.5515	38.9071	39.2085	38.4353	37.6753	37.272		34	30.5857	36.9839	37.4921	36.6521	35.9732	34	33.0643	36.9962	38.405	37.7789	36.855	34	33.0643	36.9962	38.4111	37.8399	37.8764	36.9226	34	33.0643	36.9962	38.4111	37.785	36.9962	37.7485	37.1862	34	34.0002
34.04	36.3502	38.0225	37.9434	37.8277	36.941	34.04	35.5328	38.8648	39.2807	38.4838	38.3747	38.0225	34.04	35.5328	38.8648	39.2807	38.508	37.7241	37.272		34.04	30.6701	36.9717	37.4799	36.7013	35.8803	34.04	33.0833	37.0453	38.4353	37.7911	36.8427	34.04	33.0833	37.0453	38.3989	37.9434	37.9008	37.2108	34.04	33.0833	37.0453	38.3989	37.7606	36.9901	37.7728	37.125	34.04	33.9876
34.08	36.418	38.0164	37.9981	37.7789	36.941	34.08	35.6136	38.7621	39.2747	38.5383	38.3626	38.0468	34.08	35.6136	38.7621	39.2747	38.4777	37.6509	37.2965		34.08	30.6441	36.9901	37.4921	36.6829	35.9422	34.08	33.0706	37.1127	38.4717	37.785	36.8427	34.08	33.0706	37.1127	38.4595	37.8947	37.9312	37.1372	34.08	33.0706	37.1127	38.4595	37.7789	36.9532	37.7972	37.1495	34.08	33.9624
34.12	36.3563	38.0346	38.0164	37.785	36.8857	34.12	35.6198	38.8346	39.2687	38.4595	38.3747	37.986	34.12	35.6198	38.8346	39.2687	38.4292	37.6753	37.2903		34.12	30.6701	37.0207	37.5227	36.6829	35.9546	34.12	33.077	37.0759	38.4474	37.8216	36.8673	34.12	33.077	37.0759	38.4232	37.8947	37.8947	37.0759	34.12	33.077	37.0759	38.4232	37.7728	36.9471	37.7606	37.1801	34.12	33.8553
34.16	36.492	38.0772	38.065	37.7606	36.9164	34.16	35.6198	38.8648	39.2386	38.5201	38.3686	38.0225	34.16	35.6198	38.8648	39.2386	38.4414	37.6997	37.2781		34.16	30.5662	37.0146	37.5715	36.6767	36.0103	34.16	33.0579	37.0943	38.508	37.7241	36.8243	34.16	33.0579	37.0943	38.3868	38.0164	37.8764	36.9778	34.16	33.0579	37.0943	38.3868	37.6814	36.9287	37.7363	37.1617	34.16	33.9372
34.2	36.4488	38.0589	38.0833	37.7302	36.9348	34.2	35.6508	38.8648	39.2747	38.508	38.3686	38.0042	34.2	35.6508	38.8648	39.2747	38.4292	37.7119	37.3026		34.2	30.4948	37.0023	37.5593	36.6521	35.9856	34.2	33.0706	37.0698	38.5443	37.7667	36.7935	34.2	33.0706	37.0698	38.3686	38.0164	37.9312	36.9655	34.2	33.0706	37.0698	38.3686	37.718	36.9471	37.7606	37.1617	34.2	33.9939
34.24	36.455	37.9981	38.0346	37.7363	36.9287	34.24	35.6322	38.8467	39.2386	38.4959	38.3686	38.0711	34.24	35.6322	38.8467	39.2386	38.5019	37.6936	37.2965		34.24	30.5403	37.0269	37.5776	36.6644	36.0351	34.24	33.0706	37.033	38.508	37.7728	36.8611	34.24	33.0706	37.033	38.405	37.992	37.8277	36.9226	34.24	33.0706	37.033	38.405	37.7972	36.9717	37.8703	37.1434	34.24	34.0569
34.28	36.4488	38.065	38.0285	37.7119	36.9594	34.28	35.626	38.7561	39.1844	38.4838	38.3989	38.0589	34.28	35.626	38.7561	39.1844	38.4414	37.6875	37.3393		34.28	30.6182	36.9655	37.6021	36.7382	36.0845	34.28	33.096	37.0453	38.4959	37.7424	36.8427	34.28	33.096	37.0453	38.4171	38.065	37.9312	36.9348	34.28	33.096	37.0453	38.4171	37.8033	36.9471	37.8033	37.1127	34.28	34.0632
34.32	36.4488	38.0772	38.0225	37.6997	36.9287	34.32	35.5763	38.7621	39.2326	38.4656	38.4111	38.0589	34.32	35.5763	38.7621	39.2326	38.508	37.7606	37.3209		34.32	30.6117	36.9901	37.6509	36.7382	36.0227	34.32	33.1087	37.125	38.5141	37.718	36.8427	34.32	33.1087	37.125	38.3868	37.9677	37.9677	36.9164	34.32	33.1087	37.125	38.3868	37.8703	36.9655	37.7667	37.125	34.32	34.0317
34.36	36.4673	38.0164	38.065	37.7728	36.9532	34.36	35.6384	38.8467	39.3289	38.5504	38.4535	38.0954	34.36	35.6384	38.8467	39.3289	38.4898	37.8216	37.3454		34.36	30.5273	36.9717	37.6326	36.7382	36.0165	34.36	33.1277	37.1495	38.3929	37.7728	36.8181	34.36	33.1277	37.1495	38.3807	37.8825	37.9495	36.8857	34.36	33.1277	37.1495	38.3807	37.785	36.9655	37.7606	37.0882	34.36	34.0065
34.44	36.5474	38.0468	38.0589	37.785	37.0453	34.44	35.6508	38.8648	39.2627	38.5867	38.4777	38.0711	34.44	35.6508	38.8648	39.2627	38.5019	37.7606	37.3454		34.44	30.5468	37.0146	37.6265	36.689	36.0474	34.44	33.1531	37.1372	38.3929	37.7667	36.8243	34.44	33.1531	37.1372	38.4232	37.9008	37.919	36.9471	34.44	33.1531	37.1372	38.4232	37.7972	36.9471	37.8094	37.1434	34.44	34.0128
34.48	36.3995	38.0407	38.0833	37.7424	37.0269	34.48	35.6322	38.9131	39.2988	38.5262	38.4838	38.0529	34.48	35.6322	38.9131	39.2988	38.5383	37.7728	37.2965		34.48	30.6312	37.0023	37.6265	36.6767	36.0474	34.48	33.2166	37.125	38.4111	37.7241	36.8181	34.48	33.2166	37.125	38.3626	38.0164	37.9068	36.9348	34.48	33.2166	37.125	38.3626	37.8277	36.9471	37.8277	37.1556	34.48	34.0317
34.52	36.3933	38.0954	38.1562	37.8033	37.0759	34.52	35.6384	38.9192	39.2687	38.5807	38.4292	38.0346	34.52	35.6384	38.9192	39.2687	38.5201	37.8459	37.2659		34.52	30.6441	37.0146	37.6448	36.7382	36.0536	34.52	33.1531	37.0821	38.4292	37.852	36.8243	34.52	33.1531	37.0821	38.3565	37.9555	37.9373	36.9471	34.52	33.1531	37.0821	38.3565	37.8399	36.9901	37.9251	37.1556	34.52	34.0065
34.56	36.4365	38.0833	38.1258	37.785	37.0759	34.56	35.6446	38.9312	39.3048	38.5867	38.4171	38.0772	34.56	35.6446	38.9312	39.3048	38.5867	37.8459	37.3454		34.56	30.6571	37.0759	37.6753	36.6829	36.0165	34.56	33.1975	37.1066	38.4232	37.8338	36.8734	34.56	33.1975	37.1066	38.3989	37.9495	37.9616	37.0269	34.56	33.1975	37.1066	38.3989	37.8094	37.0023	37.8764	37.1679	34.56	34.0884
34.6	36.4612	38.0833	38.1197	37.6875	36.9778	34.6	35.7005	39.0277	39.383	38.5807	38.4595	38.1258	34.6	35.7005	39.0277	39.383	38.4898	37.7789	37.3026		34.6	30.7025	37.0943	37.6265	36.6829	36.0227	34.6	33.2356	37.1434	38.4898	37.8216	36.7751	34.6	33.2356	37.1434	38.3929	37.9312	37.9434	37.0453	34.6	33.2356	37.1434	38.3929	37.8947	37.0207	37.8703	37.1924	34.6	34.1135
34.64	36.492	38.0893	38.0711	37.7789	37.0085	34.64	35.7067	39.0217	39.5932	38.5867	38.4474	38.0954	34.64	35.7067	39.0217	39.5932	38.4838	37.8216	37.2903		34.64	30.6571	37.0698	37.6204	36.7136	35.9917	34.64	33.2039	37.174	38.4898	37.7728	36.8673	34.64	33.2039	37.174	38.3626	37.9434	37.986	37.1188	34.64	33.2039	37.174	38.3626	37.852	37.0146	37.9129	37.2597	34.64	34.1261
34.68	36.5597	38.144	38.1258	37.7972	37.0759	34.68	35.6881	39.0217	39.5572	38.5625	38.4838	38.1076	34.68	35.6881	39.0217	39.5572	38.5504	37.8338	37.3638		34.68	30.6571	37.0637	37.5898	36.7259	36.0845	34.68	33.2166	37.1924	38.4838	37.8033	36.8734	34.68	33.2166	37.1924	38.4656	37.9251	37.9495	37.1188	34.68	33.2166	37.1924	38.4656	37.8399	37.033	37.7972	37.2597	34.68	34.1009
34.72	36.492	38.1562	38.1137	37.8399	37.0882	34.72	35.6508	39.0398	39.5332	38.5625	38.4898	38.065	34.72	35.6508	39.0398	39.5332	38.6351	37.8338	37.4432		34.72	30.6571	37.0882	37.6082	36.7136	36.0784	34.72	33.0897	37.1924	38.5141	37.7911	36.8611	34.72	33.0897	37.1924	38.4838	37.9555	37.9616	37.0943	34.72	33.0897	37.1924	38.4838	37.8399	37.0269	37.9251	37.2169	34.72	34.0443
34.76	36.4427	38.1987	38.0954	37.7606	37.0575	34.76	35.6446	39.082	39.5092	38.6049	38.5383	38.0468	34.76	35.6446	39.082	39.5092	38.6109	37.919	37.431		34.76	30.6636	37.0882	37.6265	36.7874	36.066	34.76	33.1341	37.1862	38.4474	37.8033	36.9471	34.76	33.1341	37.1862	38.4777	37.9555	37.9251	37.0821	34.76	33.1341	37.1862	38.4777	37.8764	37.0269	37.8703	37.2352	34.76	34.0632
34.8	36.5043	38.1623	38.1137	37.8155	37.0391	34.8	35.6508	39.0458	39.5392	38.6956	38.5443	38.1137	34.8	35.6508	39.0458	39.5392	38.6109	37.8581	37.4555		34.8	30.6831	37.125	37.6265	36.7874	35.9856	34.8	33.2419	37.2046	38.4717	37.8155	36.898	34.8	33.2419	37.2046	38.4595	37.9799	37.9981	37.1311	34.8	33.2419	37.2046	38.4595	37.8155	37.033	37.8825	37.2781	34.8	34.1009
34.84	36.5413	38.1866	38.1926	37.8703	37.0759	34.84	35.6508	39.0519	39.5092	38.7621	38.5564	38.1319	34.84	35.6508	39.0519	39.5092	38.7258	37.8459	37.431		34.84	30.6247	37.0882	37.6692	36.769	36.0845	34.84	33.2039	37.2659	38.4595	37.7911	36.9041	34.84	33.2039	37.2659	38.4595	37.9799	37.9981	36.9717	34.84	33.2039	37.2659	38.4595	37.919	37.0698	37.9129	37.2046	34.84	34.0946
34.88	36.5844	38.1744	38.1319	37.8459	37.0637	34.88	35.7315	39.1242	39.4912	38.7258	38.5262	38.1015	34.88	35.7315	39.1242	39.4912	38.5928	37.919	37.4799		34.88	30.6377	37.0882	37.7545	36.7628	36.202	34.88	33.2736	37.3332	38.4292	37.8277	36.9226	34.88	33.2736	37.3332	38.4353	38.0468	37.986	37.0575	34.88	33.2736	37.3332	38.4353	37.9008	37.0575	37.9312	37.1617	34.88	34.0884
34.92	36.5105	38.1987	38.1258	37.8094	37.1556	34.92	35.7067	39.1121	39.5272	38.7319	38.5383	38.138	34.92	35.7067	39.1121	39.5272	38.5867	37.9312	37.4371		34.92	30.6312	37.1127	37.7485	36.7382	36.1526	34.92	33.2673	37.3087	38.4777	37.9251	36.9103	34.92	33.2673	37.3087	38.5322	38.0468	38.0164	37.0269	34.92	33.2673	37.3087	38.5322	37.8703	37.0514	37.9312	37.2046	34.92	34.0758
34.96	36.5105	38.2108	38.1258	37.8581	37.125	34.96	35.6757	39.082	39.5812	38.7561	38.5201	38.1501	34.96	35.6757	39.082	39.5812	38.6109	37.919	37.4249		34.96	30.6441	37.1311	37.7241	36.7444	35.9794	34.96	33.2229	37.3209	38.5322	37.9373	36.9164	34.96	33.2229	37.3209	38.5322	38.1015	37.9981	37.033	34.96	33.2229	37.3209	38.5322	37.9434	37.0821	37.9616	37.1924	34.96	34.0695
35	36.4612	38.2473	38.1623	37.8459	37.1372	35	35.6384	39.1242	39.4491	38.7621	38.4838	38.1987	35	35.6384	39.1242	39.4491	38.617	37.9373	37.4004		35	30.6377	37.0943	37.7058	36.7505	35.9732	35	33.1531	37.2536	38.5504	37.919	36.941	35	33.1531	37.2536	38.5383	38.0589	37.9799	37.0882	35	33.1531	37.2536	38.5383	37.8825	37.0943	37.9129	37.1372	35	34.0821
35.04	36.4612	38.2473	38.1137	37.8459	37.1188	35.04	35.6508	39.1362	39.5152	38.7379	38.4777	38.1987	35.04	35.6508	39.1362	39.5152	38.6654	37.9616	37.4677		35.04	30.7025	37.1617	37.7119	36.7997	36.0351	35.04	33.2166	37.2352	38.5746	37.8642	36.9594	35.04	33.2166	37.2352	38.5262	38.1015	37.9555	37.0698	35.04	33.2166	37.2352	38.5262	37.8947	37.0698	37.9555	37.1862	35.04	34.0821
35.08	36.4427	38.2473	38.2048	37.8399	37.125	35.08	35.6571	39.1784	39.5932	38.7198	38.5443	38.1805	35.08	35.6571	39.1784	39.5932	38.7561	37.9373	37.4799		35.08	30.709	37.174	37.7058	36.8611	36.1402	35.08	33.2292	37.2536	38.5625	37.8886	36.9655	35.08	33.2292	37.2536	38.5746	38.0893	38.0042	37.0698	35.08	33.2292	37.2536	38.5746	37.9434	37.0575	37.9555	37.2352	35.08	34.0632
35.12	36.4488	38.2412	38.1744	37.8399	37.0821	35.12	35.6943	39.1724	39.5872	38.7138	38.5988	38.1805	35.12	35.6943	39.1724	39.5872	38.7319	37.9312	37.541		35.12	30.6961	37.1862	37.7424	36.8427	36.1217	35.12	33.318	37.3454	38.6049	37.9129	36.9778	35.12	33.318	37.3454	38.5625	38.1319	38.0225	37.0453	35.12	33.318	37.3454	38.5625	37.9738	37.0759	37.9799	37.2536	35.12	33.9624
35.16	36.4303	38.2412	38.1744	37.9495	37.1127	35.16	35.7253	39.1603	39.6112	38.75	38.6049	38.1866	35.16	35.7253	39.1603	39.6112	38.7742	37.9677	37.5715		35.16	30.7415	37.1862	37.7302	36.8489	36.0598	35.16	33.299	37.3209	38.6109	37.9312	36.941	35.16	33.299	37.3209	38.5564	38.1501	38.0225	37.0085	35.16	33.299	37.3209	38.5564	37.9495	37.0821	37.986	37.272	35.16	33.9498
35.2	36.4735	38.2169	38.1623	37.9008	37.0943	35.2	35.7191	39.1664	39.6352	38.8225	38.617	38.5201	35.2	35.7191	39.1664	39.6352	38.6896	37.9738	37.5776		35.2	30.7933	37.174	37.8216	36.8366	36.0474	35.2	33.2736	37.3087	38.6351	37.9312	36.8304	35.2	33.2736	37.3087	38.5746	38.0042	38.0529	37.0821	35.2	33.2736	37.3087	38.5746	38.0103	37.1372	38.0042	37.2842	35.2	33.9939
35.28	36.4427	38.2169	38.1623	37.8947	37.1495	35.28	35.7501	39.1423	39.7072	38.8225	38.617	38.3747	35.28	35.7501	39.1423	39.7072	38.8044	37.9616	37.5959		35.28	30.735	37.1495	37.8581	36.8304	36.0474	35.28	33.2419	37.2903	38.623	38.0407	36.8427	35.28	33.2419	37.2903	38.5928	38.0225	38.0164	37.0698	35.28	33.2419	37.2903	38.5928	38.0164	37.1188	37.992	37.2781	35.28	34.0695
35.32	36.4612	38.308	38.2412	37.9008	37.1495	35.32	35.7563	39.1603	39.6652	38.8286	38.6593	38.3383	35.32	35.7563	39.1603	39.6652	38.7923	37.9799	37.5898		35.32	30.6377	37.1495	37.8216	36.8181	36.0907	35.32	33.2356	37.2414	38.7017	37.992	36.9226	35.32	33.2356	37.2414	38.6896	38.1076	38.1015	37.0698	35.32	33.2356	37.2414	38.6896	38.0893	37.1188	37.986	37.2781	35.32	34.0569
35.36	36.7013	38.2776	38.3989	37.8703	37.1679	35.36	35.7873	39.1483	39.6712	38.7984	38.6472	38.2655	35.36	35.7873	39.1483	39.6712	38.75	37.9373	37.5105		35.36	30.5987	37.174	37.7911	36.8796	36.0474	35.36	33.1214	37.2965	38.7017	37.9981	36.9287	35.36	33.1214	37.2965	38.7138	38.138	38.0285	37.1617	35.36	33.1214	37.2965	38.7138	38.0589	37.1372	38.0164	37.3271	35.36	34.1009
35.4	36.455	38.2898	38.4232	37.9008	37.2108	35.4	35.7687	39.2085	39.5212	38.75	38.623	38.2594	35.4	35.7687	39.2085	39.5212	38.7077	37.992	37.5532		35.4	30.5532	37.174	37.7789	36.9103	36.0907	35.4	33.1785	37.3454	38.6109	37.986	36.9103	35.4	33.1785	37.3454	38.6654	38.0954	38.0529	37.0943	35.4	33.1785	37.3454	38.6654	38.0711	37.125	38.0164	37.2903	35.4	34.145
35.44	36.5105	38.2958	38.3989	37.992	37.2659	35.44	35.7129	39.0277	39.5392	38.7802	38.623	38.2655	35.44	35.7129	39.0277	39.5392	38.7017	37.986	37.5654		35.44	30.5532	37.1617	37.7485	36.8427	36.1155	35.44	33.1849	37.3454	38.6049	37.992	36.9532	35.44	33.1849	37.3454	38.6654	38.1137	38.0833	37.1556	35.44	33.1849	37.3454	38.6654	38.0529	37.1127	38.0164	37.3209	35.44	34.1009
35.48	36.4858	38.2533	38.3929	38.0529	37.2842	35.48	35.7253	39.0639	39.5632	38.8286	38.6412	38.3019	35.48	35.7253	39.0639	39.5632	38.7017	38.0042	37.4982		35.48	30.5208	37.2108	37.7789	36.8366	36.1464	35.48	33.1468	37.3209	38.6714	38.0042	36.9778	35.48	33.1468	37.3209	38.7138	38.1076	38.144	37.2046	35.48	33.1468	37.3209	38.7138	38.0468	37.2781	38.0711	37.4921	35.48	34.1827
35.52	36.5351	38.2655	38.3383	38.0225	37.2108	35.52	35.7191	39.1242	39.5992	38.7863	38.7077	38.3504	35.52	35.7191	39.1242	39.5992	38.7379	37.992	37.5349		35.52	30.5468	37.2108	37.785	36.8857	36.0969	35.52	33.1658	37.3209	38.6533	37.992	36.9471	35.52	33.1658	37.3209	38.7017	38.1501	38.138	37.1127	35.52	33.1658	37.3209	38.7017	38.0954	37.2536	38.065	37.4249	35.52	34.189
35.56	36.5413	38.2776	38.3383	38.0225	37.2597	35.56	35.8307	39.076	39.5692	38.7984	38.6835	38.3444	35.56	35.8307	39.076	39.5692	38.6775	37.9799	37.5593		35.56	30.5338	37.1985	37.8094	36.8918	36.1155	35.56	33.1595	37.2903	38.6291	38.0285	36.9471	35.56	33.1595	37.2903	38.7077	38.1683	38.1319	37.125	35.56	33.1595	37.2903	38.7077	38.0893	37.2352	38.1137	37.376	35.56	34.2141
35.6	36.5536	38.3262	38.3322	38.0346	37.2414	35.6	35.7873	39.1121	39.5092	38.7682	38.6654	38.2958	35.6	35.7873	39.1121	39.5092	38.6775	37.9799	37.5898		35.6	30.5078	37.1985	37.8094	36.898	36.1526	35.6	33.1658	37.3332	38.7319	38.1137	36.8918	35.6	33.1658	37.3332	38.7319	38.1744	38.2048	37.2108	35.6	33.1658	37.3332	38.7319	38.1197	37.2352	38.1015	37.4127	35.6	34.1953
35.64	36.4858	38.2837	38.3686	37.9312	37.2414	35.64	35.7501	39.088	39.5092	38.8407	38.6654	38.2715	35.64	35.7501	39.088	39.5092	38.5807	37.9616	37.5837		35.64	30.6117	37.125	37.8216	36.8918	36.1649	35.64	33.2166	37.4066	38.7379	38.0407	36.8611	35.64	33.2166	37.4066	38.7077	38.2048	38.2108	37.1679	35.64	33.2166	37.4066	38.7077	38.065	37.2659	38.1076	37.4494	35.64	34.1827
35.68	36.4981	38.2776	38.314	37.986	37.3026	35.68	35.7811	39.07	39.4191	38.7863	38.6291	38.2169	35.68	35.7811	39.07	39.4191	38.617	37.9495	37.5776		35.68	30.6377	37.1556	37.8277	36.898	36.1649	35.68	33.2039	37.3576	38.6896	38.1319	36.9103	35.68	33.2039	37.3576	38.7138	38.2291	38.2169	37.1495	35.68	33.2039	37.3576	38.7138	38.0164	37.2903	38.144	37.5227	35.68	34.1827
35.72	36.4735	38.2594	38.3201	37.9677	37.3209	35.72	35.7935	38.9916	39.4611	38.7138	38.6896	38.2473	35.72	35.7935	38.9916	39.4611	38.6654	37.992	37.5715		35.72	30.6377	37.1495	37.8033	36.8857	36.2267	35.72	33.2166	37.272	38.6956	38.1623	36.9348	35.72	33.2166	37.272	38.6835	38.2533	38.1866	37.1495	35.72	33.2166	37.272	38.6835	38.0589	37.223	38.1076	37.4921	35.72	34.1701
35.76	36.5105	38.1926	38.3383	37.9129	37.2842	35.76	35.7811	38.9916	39.4491	38.7984	38.7319	38.2594	35.76	35.7811	38.9916	39.4491	38.6533	38.0042	37.5654		35.76	30.5987	37.1617	37.8825	36.8857	36.2514	35.76	33.2039	37.2659	38.7379	38.2108	37.0391	35.76	33.2039	37.2659	38.6533	38.1623	38.1744	37.1005	35.76	33.2039	37.2659	38.6533	38.065	37.2169	38.1683	37.5105	35.76	34.1513
35.8	36.492	38.1926	38.3807	37.9251	37.2659	35.8	35.8059	38.9855	39.4852	38.7923	38.75	38.2048	35.8	35.8059	38.9855	39.4852	38.6412	37.9799	37.5776		35.8	30.6506	37.2169	37.8399	36.8918	36.2329	35.8	33.1151	37.2291	38.75	38.0954	37.0821	35.8	33.1151	37.2291	38.6835	38.144	38.2048	37.1434	35.8	33.1151	37.2291	38.6835	38.0833	37.2475	38.2048	37.5105	35.8	34.1198
35.84	36.5413	38.2108	38.3929	37.9616	37.2965	35.84	35.7563	39.0579	39.4551	38.889	38.7319	38.2715	35.84	35.7563	39.0579	39.4551	38.5988	38.0225	37.5837		35.84	30.5922	37.1862	37.7911	36.9287	36.2082	35.84	33.1531	37.2169	38.7682	38.138	37.033	35.84	33.1531	37.2169	38.6775	38.1805	38.1866	37.223	35.84	33.1531	37.2169	38.6775	38.0589	37.174	38.223	37.5166	35.84	34.1324
35.88	36.4427	38.3019	38.3929	38.0225	37.3148	35.88	35.8803	38.9795	39.4491	38.8648	38.7138	38.3019	35.88	35.8803	38.9795	39.4491	38.5928	38.0164	37.6326		35.88	30.5532	37.1434	37.8155	36.9226	36.2143	35.88	33.1722	37.1985	38.7319	38.2048	37.0637	35.88	33.1722	37.1985	38.6775	38.2655	38.1926	37.3699	35.88	33.1722	37.1985	38.6775	38.0954	37.1985	38.2169	37.4982	35.88	34.1135
35.92	36.492	38.3201	38.4111	37.9799	37.3209	35.92	35.8927	39.0217	39.5092	38.7561	38.7017	38.3504	35.92	35.8927	39.0217	39.5092	38.5988	38.065	37.6448		35.92	30.5857	37.1801	37.8459	36.9717	36.2946	35.92	33.3053	37.2414	38.7802	38.144	37.0698	35.92	33.3053	37.2414	38.7319	38.2412	38.1623	37.1862	35.92	33.3053	37.2414	38.7319	37.9981	37.2536	38.138	37.5043	35.92	34.1324
35.96	36.5228	38.314	38.3262	37.9495	37.3087	35.96	35.8679	38.9855	39.4972	38.7561	38.7379	38.3383	35.96	35.8679	38.9855	39.4972	38.623	38.0772	37.6448		35.96	30.5922	37.1679	37.852	36.941	36.307	35.96	33.3116	37.2475	38.7379	38.1319	37.0759	35.96	33.3116	37.2475	38.744	38.2533	38.2715	37.2536	35.96	33.3116	37.2475	38.744	38.0833	37.3271	38.1562	37.4677	35.96	34.1198
36	36.5597	38.3262	38.3929	37.986	37.3271	36	35.8059	38.9916	39.4731	38.7863	38.7379	38.405	36	35.8059	38.9916	39.4731	38.6291	38.0711	37.6204		36	30.5532	37.1311	37.8581	36.9348	36.2452	36	33.2673	37.2475	38.6835	38.1319	37.0698	36	33.2673	37.2475	38.623	38.2473	38.308	37.3209	36	33.2673	37.2475	38.623	38.1805	37.3026	38.1562	37.4738	36	34.0758
36.04	36.4488	38.2837	38.3929	38.0164	37.3209	36.04	35.7625	39.0217	39.4731	38.7802	38.8165	38.3504	36.04	35.7625	39.0217	39.4731	38.6109	38.0346	37.6387		36.04	30.7803	36.9962	37.8399	36.9348	36.2205	36.04	33.2673	37.4004	38.6956	38.1258	37.033	36.04	33.2673	37.4004	38.6412	38.2533	38.2715	37.2536	36.04	33.2673	37.4004	38.6412	38.2291	37.2965	38.1623	37.4555	36.04	34.0443
36.12	36.3995	38.2412	38.3686	38.0285	37.3148	36.12	35.7439	39.0097	39.4852	38.7742	38.8105	38.3383	36.12	35.7439	39.0097	39.4852	38.6291	37.986	37.5654		36.12	30.7803	37.0698	37.8642	37.0085	36.2576	36.12	33.2356	37.3332	38.6654	38.1319	37.0637	36.12	33.2356	37.3332	38.7621	38.2108	38.308	37.2842	36.12	33.2356	37.3332	38.7621	38.2655	37.2597	38.1683	37.4738	36.12	34.1009
36.16	36.3872	38.308	38.4292	38.0103	37.2965	36.16	35.7935	39.0157	39.4251	38.7863	38.8105	38.3807	36.16	35.7935	39.0157	39.4251	38.6775	38.0285	37.6143		36.16	30.7544	37.1311	37.8886	36.9717	36.2823	36.16	33.2102	37.3576	38.7379	38.223	37.0637	36.16	33.2102	37.3576	38.6775	38.2958	38.2291	37.3271	36.16	33.2102	37.3576	38.6775	38.1744	37.2108	38.223	37.5227	36.16	34.1135
36.2	36.4797	38.2776	38.3807	38.0589	37.4616	36.2	35.7997	39.088	39.389	38.7621	38.8105	38.405	36.2	35.7997	39.088	39.389	38.7017	38.065	37.6936		36.2	30.6896	37.1434	37.8886	36.9226	36.3131	36.2	33.2166	37.4004	38.7621	38.2048	37.0637	36.2	33.2166	37.4004	38.7258	38.2655	38.2291	37.2781	36.2	33.2166	37.4004	38.7258	38.1866	37.1556	38.3019	37.5227	36.2	34.1764
36.24	36.5413	38.2898	38.3686	38.0346	37.3515	36.24	35.6943	39.0639	39.5932	38.8165	38.8165	38.3565	36.24	35.6943	39.0639	39.5932	38.6896	38.1137	37.7058		36.24	30.6961	37.1495	37.8947	36.9348	36.2576	36.24	33.2166	37.376	38.7984	38.1805	37.1188	36.24	33.2166	37.376	38.7198	38.2837	38.2351	37.376	36.24	33.2166	37.376	38.7198	38.138	37.223	38.2715	37.5288	36.24	34.1764
36.28	36.529	38.2776	38.3807	38.0407	37.3576	36.28	35.7501	39.0941	39.5332	38.7621	38.8286	38.4535	36.28	35.7501	39.0941	39.5332	38.7077	38.0468	37.7058		36.28	30.6896	37.1679	37.8947	36.9532	36.2884	36.28	33.2609	37.3821	38.8286	38.1623	37.1801	36.28	33.2609	37.3821	38.6714	38.3565	38.2291	37.2965	36.28	33.2609	37.3821	38.6714	38.1623	37.2597	38.1683	37.5593	36.28	34.145
36.32	36.4242	38.2351	38.3747	37.9981	37.4004	36.32	35.8059	38.9976	39.5452	38.7984	38.8346	38.4474	36.32	35.8059	38.9976	39.5452	38.6956	38.0468	37.718		36.32	30.8063	37.1556	37.9129	37.0085	36.4057	36.32	33.2356	37.2903	38.8527	38.1623	37.1679	36.32	33.2356	37.2903	38.6412	38.2898	38.2837	37.3332	36.32	33.2356	37.2903	38.6412	38.2958	37.3454	38.1744	37.5593	36.32	34.2267
36.36	36.4427	38.2048	38.4232	37.9981	37.4188	36.36	35.7563	39.0639	39.5452	38.9373	38.8346	38.4535	36.36	35.7563	39.0639	39.5452	38.6775	38.0407	37.7606		36.36	30.7544	37.1679	37.9251	37.0698	36.3502	36.36	33.2102	37.3271	38.8829	38.1562	37.2536	36.36	33.2102	37.3271	38.6593	38.308	38.2898	37.3087	36.36	33.2102	37.3271	38.6593	38.2412	37.376	38.1805	37.541	36.36	34.3712
36.4	36.4365	38.2898	38.5019	38.065	37.431	36.4	35.7191	39.07	39.5032	38.7682	38.9373	38.4171	36.4	35.7191	39.07	39.5032	38.7198	38.0772	37.6997		36.4	30.7803	37.174	37.9495	37.0514	36.3995	36.4	33.2609	37.3821	38.8829	38.1926	37.2475	36.4	33.2609	37.3821	38.6654	38.308	38.2898	37.3699	36.4	33.2609	37.3821	38.6654	38.2473	37.376	38.144	37.5105	36.4	34.2141
36.44	36.4797	38.3201	38.4414	38.1319	37.4249	36.44	35.8555	39.0277	39.5032	38.7984	38.8044	38.3989	36.44	35.8555	39.0277	39.5032	38.75	38.1258	37.7241		36.44	30.7739	37.1372	37.9495	37.0882	36.4057	36.44	33.3116	37.4066	38.8709	38.2837	37.1862	36.44	33.3116	37.4066	38.7077	38.3807	38.3262	37.3148	36.44	33.3116	37.4066	38.7077	38.2473	37.3638	38.2594	37.541	36.44	34.1827
36.48	36.5043	38.3565	38.4595	38.1137	37.4066	36.48	35.8245	39.0458	39.4972	38.8044	38.7742	38.3565	36.48	35.8245	39.0458	39.4972	38.75	38.0833	37.718		36.48	30.8387	37.1434	37.8825	37.125	36.3502	36.48	33.3433	37.4188	38.7923	38.2715	37.1801	36.48	33.3433	37.4188	38.7561	38.3504	38.2898	37.3393	36.48	33.3433	37.4188	38.7561	38.2655	37.3821	38.1744	37.5776	36.48	34.189
36.52	36.455	38.3201	38.4777	38.065	37.3699	36.52	35.8121	39.0217	39.4731	38.8286	38.7682	38.405	36.52	35.8121	39.0217	39.4731	38.7561	38.0893	37.7119		36.52	30.7998	37.1434	37.8825	37.1066	36.3193	36.52	33.3053	37.4004	38.7984	38.2594	37.1556	36.52	33.3053	37.4004	38.7802	38.3383	38.2898	37.3515	36.52	33.3053	37.4004	38.7802	38.3383	37.3026	38.2715	37.6631	36.52	34.1513
36.56	36.455	38.3444	38.4111	38.0772	37.3943	36.56	35.7997	39.0157	39.4852	38.8407	38.8105	38.4535	36.56	35.7997	39.0157	39.4852	38.7077	38.0772	37.7363		36.56	30.8192	37.1495	37.9312	37.125	36.4427	36.56	33.2483	37.4127	38.8467	38.2169	37.1801	36.56	33.2483	37.4127	38.7319	38.4232	38.314	37.3515	36.56	33.2483	37.4127	38.7319	38.3019	37.3454	38.2837	37.6936	36.56	34.2016
36.6	36.5351	38.4171	38.4595	38.1137	37.4249	36.6	35.8121	38.9795	39.4491	38.8588	38.8346	38.4232	36.6	35.8121	38.9795	39.4491	38.7138	38.1562	37.6875		36.6	30.8063	37.1556	37.9434	37.1005	36.3872	36.6	33.337	37.4249	38.8165	38.1987	37.2169	36.6	33.337	37.4249	38.7319	38.4353	38.3383	37.376	36.6	33.337	37.4249	38.7319	38.3504	37.3515	38.3201	37.6814	36.6	34.1387
36.64	36.5228	38.3626	38.4595	38.138	37.4432	36.64	35.8369	39.0217	39.4611	38.889	38.8044	38.4959	36.64	35.8369	39.0217	39.4611	38.7138	38.1258	37.6509		36.64	30.7998	37.2108	37.9251	37.1005	36.3933	36.64	33.1849	37.486	38.8346	38.2108	37.272	36.64	33.1849	37.486	38.744	38.3262	38.3444	37.3515	36.64	33.1849	37.486	38.744	38.2291	37.3393	38.3565	37.6753	36.64	34.1261
36.68	36.5597	38.3444	38.5262	38.1197	37.4616	36.68	35.936	38.9493	39.5632	38.8769	38.8588	38.4414	36.68	35.936	38.9493	39.5632	38.744	38.0589	37.657		36.68	30.7025	37.2536	37.986	37.0759	36.3748	36.68	33.2673	37.486	38.8165	38.2291	37.2414	36.68	33.2673	37.486	38.7319	38.3807	38.3565	37.4371	36.68	33.2673	37.486	38.7319	38.2655	37.2965	38.2837	37.6753	36.68	34.1135
36.72	36.5597	38.3262	38.4898	38.1683	37.4799	36.72	35.8741	38.9855	39.4852	38.8829	38.8105	38.5019	36.72	35.8741	38.9855	39.4852	38.7561	38.0285	37.785		36.72	30.722	37.2291	38.0285	37.0821	36.381	36.72	33.3243	37.4494	38.7863	38.1926	37.2291	36.72	33.3243	37.4494	38.7258	38.4414	38.3565	37.3699	36.72	33.3243	37.4494	38.7258	38.2412	37.2903	38.2837	37.6448	36.72	34.1072
36.76	36.5351	38.3868	38.405	38.1926	37.4494	36.76	35.7873	38.9674	39.4551	38.9071	38.7682	38.4595	36.76	35.7873	38.9674	39.4551	38.7863	38.0468	37.785		36.76	30.7479	37.1924	37.986	37.0821	36.3687	36.76	33.2863	37.4127	38.7682	38.1805	37.2475	36.76	33.2863	37.4127	38.7198	38.4414	38.3565	37.4127	36.76	33.2863	37.4127	38.7198	38.2048	37.272	38.308	37.6448	36.76	34.1638
36.8	36.5228	38.3626	38.4111	38.1744	37.4371	36.8	35.8307	39.0458	39.4972	38.9855	38.7923	38.4959	36.8	35.8307	39.0458	39.4972	38.7923	38.0772	37.7119		36.8	30.735	37.1985	37.9434	37.125	36.3872	36.8	33.2863	37.4616	38.8286	38.2655	37.2536	36.8	33.2863	37.4616	38.8467	38.4595	38.3444	37.4982	36.8	33.2863	37.4616	38.8467	38.2412	37.2597	38.2776	37.6997	36.8	34.1827
36.84	36.5105	38.3444	38.3929	38.2291	37.4494	36.84	35.8493	38.9976	39.4731	38.9614	38.8346	38.508	36.84	35.8493	38.9976	39.4731	38.7984	38.1137	37.6997		36.84	30.8257	37.223	37.9616	37.1188	36.3131	36.84	33.3687	37.4921	38.8165	38.2473	37.1924	36.84	33.3687	37.4921	38.7923	38.4353	38.3444	37.431	36.84	33.3687	37.4921	38.7923	38.2715	37.2781	38.3504	37.718	36.84	34.2016
36.88	36.4797	38.3444	38.4595	38.223	37.5471	36.88	35.7873	38.9735	39.5872	39.0458	38.901	38.4959	36.88	35.7873	38.9735	39.5872	38.7984	38.138	37.785		36.88	30.8322	37.1679	37.9616	37.1005	36.344	36.88	33.3813	37.486	38.8527	38.2351	37.1862	36.88	33.3813	37.486	38.7621	38.4232	38.3626	37.4127	36.88	33.3813	37.486	38.7621	38.2473	37.2965	38.3626	37.7302	36.88	34.189
36.96	36.4981	38.3504	38.5746	38.1744	37.4799	36.96	35.8927	39.0579	39.5572	38.9373	38.8527	38.5322	36.96	35.8927	39.0579	39.5572	38.7621	38.1258	37.8277		36.96	30.7674	37.1801	37.919	37.174	36.3625	36.96	33.3687	37.4738	38.8346	38.2412	37.2291	36.96	33.3687	37.4738	38.75	38.4474	38.4959	37.4494	36.96	33.3687	37.4738	38.75	38.2837	37.3148	38.3626	37.7119	36.96	34.0884
37	36.5105	38.3807	38.5262	38.1197	37.5043	37	35.8369	39.0579	39.5632	39.0157	38.8286	38.5141	37	35.8369	39.0579	39.5632	38.7258	38.1623	37.852		37	30.7609	37.1985	37.9129	37.1434	36.344	37	33.3243	37.3943	38.8527	38.2291	37.174	37	33.3243	37.3943	38.7802	38.4414	38.4777	37.4188	37	33.3243	37.3943	38.7802	38.2898	37.2965	38.4232	37.6997	37	34.0758
37.04	36.5905	38.4535	38.5564	38.1623	37.4982	37.04	35.8493	39.0579	39.5512	38.9674	38.8829	38.4959	37.04	35.8493	39.0579	39.5512	38.744	38.1744	37.8581		37.04	30.7803	37.2108	37.9677	37.1311	36.3687	37.04	33.3307	37.4371	38.9252	38.223	37.2352	37.04	33.3307	37.4371	38.7682	38.5262	38.4474	37.3821	37.04	33.3307	37.4371	38.7682	38.2715	37.3148	38.4474	37.7485	37.04	34.1324
37.08	36.6582	38.3686	38.5141	38.0833	37.5227	37.08	35.8865	39.0217	39.5512	38.8407	38.9131	38.4535	37.08	35.8865	39.0217	39.5512	38.7621	38.1623	37.8642		37.08	30.8128	37.2659	37.9677	37.1617	36.3687	37.08	33.28	37.431	38.9071	38.2291	37.1434	37.08	33.28	37.431	38.75	38.5322	38.4292	37.376	37.08	33.28	37.431	38.75	38.2351	37.2781	38.405	37.5349	37.08	34.1324
37.12	36.6275	38.3747	38.4717	38.0711	37.4494	37.12	35.936	39.0458	39.5032	38.8407	38.889	38.4535	37.12	35.936	39.0458	39.5032	38.7077	38.2169	37.9068		37.12	30.7868	37.2965	37.9616	37.1495	36.3625	37.12	33.3053	37.4188	38.9373	38.2473	37.1924	37.12	33.3053	37.4188	38.8044	38.4898	38.4171	37.4004	37.12	33.3053	37.4188	38.8044	38.2594	37.2781	38.3626	37.5471	37.12	34.1827
37.16	36.4673	38.4353	38.4535	38.1562	37.4494	37.16	35.8555	39.0157	39.5452	38.895	38.8648	38.508	37.16	35.8555	39.0157	39.5452	38.6593	38.1623	37.7667		37.16	30.7868	37.2659	38.0164	37.1801	36.4365	37.16	33.2483	37.4677	39.0398	38.3565	37.2046	37.16	33.2483	37.4677	38.8225	38.4474	38.4232	37.3882	37.16	33.2483	37.4677	38.8225	38.2594	37.2536	38.3565	37.6021	37.16	34.1701
37.2	36.6029	38.4232	38.4959	38.138	37.4921	37.2	35.8245	39.0157	39.4912	38.8769	38.9252	38.508	37.2	35.8245	39.0157	39.4912	38.7138	38.0954	37.6692		37.2	30.7544	37.3821	37.9677	37.1862	36.4735	37.2	33.2926	37.486	39.0338	38.2291	37.2475	37.2	33.2926	37.486	38.8225	38.4111	38.405	37.3821	37.2	33.2926	37.486	38.8225	38.2776	37.223	38.3444	37.6631	37.2	34.2267
37.24	36.689	38.3686	38.5625	38.0954	37.5593	37.24	35.7625	39.0458	39.5092	38.8527	38.9131	38.5807	37.24	35.7625	39.0458	39.5092	38.7621	38.144	37.7485		37.24	30.7803	37.2597	37.9677	37.1801	36.455	37.24	33.2863	37.4738	38.9312	38.2958	37.2536	37.24	33.2863	37.4738	38.889	38.4292	38.3929	37.486	37.24	33.2863	37.4738	38.889	38.2533	37.2903	38.3868	37.718	37.24	34.3084
37.28	36.6767	38.3686	38.6049	38.1562	37.5288	37.28	35.7749	39.076	39.5032	38.9071	38.9252	38.5686	37.28	35.7749	39.076	39.5032	38.7682	38.144	37.8338		37.28	30.7868	37.2475	38.0285	37.1862	36.4858	37.28	33.2673	37.4432	38.9192	38.2837	37.272	37.28	33.2673	37.4432	38.8829	38.4353	38.3807	37.5166	37.28	33.2673	37.4432	38.8829	38.2715	37.4004	38.3444	37.7302	37.28	34.2707
37.32	36.689	38.4898	38.5201	38.1623	37.4982	37.32	35.8431	39.0458	39.5812	38.9373	38.9312	38.5141	37.32	35.8431	39.0458	39.5812	38.8044	38.223	37.8033		37.32	30.7479	37.2659	38.0407	37.1617	36.455	37.32	33.2926	37.4004	38.8407	38.2958	37.2781	37.32	33.2926	37.4004	38.9252	38.4474	38.4111	37.5227	37.32	33.2926	37.4004	38.9252	38.3444	37.3699	38.3807	37.7363	37.32	34.2519
37.36	36.6644	38.4111	38.4898	38.1744	37.5227	37.36	35.8183	38.9855	39.5272	38.9674	38.9131	38.5019	37.36	35.8183	38.9855	39.5272	38.7742	38.1501	37.8703		37.36	30.8322	37.3271	38.0589	37.174	36.4118	37.36	33.2863	37.3943	38.8769	38.3807	37.2965	37.36	33.2863	37.3943	38.9192	38.4232	38.4353	37.5227	37.36	33.2863	37.3943	38.9192	38.3201	37.3943	38.3747	37.7606	37.36	34.1638
37.4	36.7505	38.3929	38.5019	38.1926	37.4555	37.4	35.8431	38.9795	39.5392	38.9614	38.9493	38.5201	37.4	35.8431	38.9795	39.5392	38.7742	38.1623	37.8825		37.4	30.7739	37.272	38.0164	37.174	36.381	37.4	33.2863	37.3821	38.8588	38.3626	37.223	37.4	33.2863	37.3821	38.901	38.4717	38.4171	37.541	37.4	33.2863	37.3821	38.901	38.3262	37.4616	38.3929	37.7606	37.4	34.2079
37.44	36.7321	38.3626	38.4353	38.1805	37.5593	37.44	35.8617	39.0036	39.5872	38.9855	38.9071	38.5383	37.44	35.8617	39.0036	39.5872	38.7802	38.1501	37.8703		37.44	30.7998	37.3209	38.0164	37.2046	36.3687	37.44	33.3116	37.4249	38.8648	38.308	37.272	37.44	33.3116	37.4249	38.8709	38.4414	38.4717	37.5654	37.44	33.3116	37.4249	38.8709	38.3019	37.431	38.4353	37.7667	37.44	34.233
37.48	36.7628	38.3989	38.5383	38.1197	37.541	37.48	35.8121	38.9674	39.5452	39.0398	38.9312	38.5746	37.48	35.8121	38.9674	39.5452	38.7742	38.1987	37.8703		37.48	30.7739	37.2046	38.0346	37.1985	36.3625	37.48	33.2736	37.4004	38.889	38.314	37.3087	37.48	33.2736	37.4004	38.9252	38.4535	38.4474	37.5959	37.48	33.2736	37.4004	38.9252	38.3444	37.4066	38.4414	37.7667	37.48	34.2079
37.52	36.7013	38.4656	38.5867	38.1562	37.4982	37.52	35.7811	38.9855	39.5392	39.1001	38.9735	38.5746	37.52	35.7811	38.9855	39.5392	38.7682	38.1805	37.8825		37.52	30.7674	37.174	37.986	37.2169	36.3255	37.52	33.2609	37.4188	38.8769	38.3444	37.2903	37.52	33.2609	37.4188	38.9674	38.3383	38.5019	37.5349	37.52	33.2609	37.4188	38.9674	38.3262	37.4127	38.4656	37.7363	37.52	34.2141
37.56	36.6582	38.4595	38.5746	38.1562	37.4432	37.56	35.7811	38.9916	39.5812	38.9916	39.0458	38.5564	37.56	35.7811	38.9916	39.5812	38.8165	38.2351	37.785		37.56	30.7803	37.2291	38.0285	37.223	36.3563	37.56	33.3497	37.3943	38.9312	38.2898	37.2414	37.56	33.3497	37.3943	38.9433	38.5141	38.4959	37.5532	37.56	33.3497	37.3943	38.9433	38.3262	37.4249	38.4838	37.7485	37.56	34.2204
37.6	36.5659	38.4656	38.6049	38.3019	37.5043	37.6	35.8121	38.9795	39.5512	39.0217	38.9976	38.6291	37.6	35.8121	38.9795	39.5512	38.8165	38.144	37.8155		37.6	30.7803	37.223	38.0285	37.223	36.3687	37.6	33.3053	37.4982	38.889	38.2898	37.223	37.6	33.3053	37.4982	38.9131	38.5141	38.4595	37.5471	37.6	33.3053	37.4982	38.9131	38.3262	37.4371	38.4474	37.6997	37.6	34.1953
37.64	36.6029	38.5504	38.6896	38.308	37.5654	37.64	35.8555	39.0157	39.5332	38.9976	39.0157	38.617	37.64	35.8555	39.0157	39.5332	38.8286	38.2108	37.8216		37.64	30.8387	37.2781	38.1137	37.2536	36.4303	37.64	33.3116	37.4555	38.9131	38.2958	37.2108	37.64	33.3116	37.4555	38.9433	38.4959	38.4959	37.5166	37.64	33.3116	37.4555	38.9433	38.3322	37.4982	38.4474	37.6936	37.64	34.1953
37.68	36.6213	38.508	38.7077	38.1805	37.5959	37.68	35.8741	39.0338	39.5152	39.0458	38.9976	38.6654	37.68	35.8741	39.0338	39.5152	38.8286	38.2715	37.8459		37.68	30.7868	37.2781	38.0589	37.1985	36.4612	37.68	33.4193	37.4371	38.9131	38.2837	37.2046	37.68	33.4193	37.4371	38.9312	38.4898	38.5443	37.5166	37.68	33.4193	37.4371	38.9312	38.314	37.4982	38.4292	37.7667	37.68	34.1764
37.72	36.6213	38.5019	38.6896	38.223	37.5654	37.72	35.8369	39.0097	39.5632	39.0458	38.9614	38.6109	37.72	35.8369	39.0097	39.5632	38.8105	38.2473	37.8277		37.72	30.8128	37.2659	38.1015	37.2414	36.5043	37.72	33.3307	37.431	38.9674	38.3262	37.3332	37.72	33.3307	37.431	38.9554	38.4656	38.5019	37.541	37.72	33.3307	37.431	38.9554	38.3747	37.5105	38.4656	37.7789	37.72	34.1701
37.76	36.6767	38.5564	38.6593	38.2594	37.5776	37.76	35.8555	39.0217	39.5572	39.0217	38.901	38.6533	37.76	35.8555	39.0217	39.5572	38.8346	38.2776	37.8947		37.76	30.7609	37.2781	38.1501	37.2659	36.4981	37.76	33.2673	37.4004	38.9916	38.3686	37.376	37.76	33.2673	37.4004	39.0097	38.4777	38.4838	37.5898	37.76	33.2673	37.4004	39.0097	38.3383	37.5166	38.5262	37.7363	37.76	34.145
37.84	36.7075	38.5322	38.6775	38.2594	37.5471	37.84	35.8183	39.0398	39.5632	38.9855	38.9554	38.623	37.84	35.8183	39.0398	39.5632	38.8225	38.2837	37.8581		37.84	30.8451	37.223	38.1137	37.2291	36.492	37.84	33.3687	37.4249	38.9674	38.4171	37.3515	37.84	33.3687	37.4249	38.9493	38.5201	38.4777	37.7058	37.84	33.3687	37.4249	38.9493	38.3989	37.5349	38.5141	37.7789	37.84	34.1701
37.88	36.6213	38.5504	38.6775	38.2715	37.5532	37.88	35.8183	39.0277	39.5752	39.0458	39.0217	38.6291	37.88	35.8183	39.0277	39.5752	38.8225	38.2108	37.8825		37.88	30.8387	37.223	38.0772	37.2659	36.492	37.88	33.394	37.4738	38.9795	38.3807	37.376	37.88	33.394	37.4738	38.9071	38.6412	38.5625	37.7119	37.88	33.394	37.4738	38.9071	38.4414	37.541	38.4717	37.7424	37.88	34.2644
37.92	36.6706	38.5383	38.7017	38.3019	37.5715	37.92	35.8493	39.0639	39.5692	38.9976	38.9373	38.6291	37.92	35.8493	39.0639	39.5692	38.8225	38.2473	37.8825		37.92	30.8516	37.2414	38.1562	37.223	36.5967	37.92	33.356	37.4921	39.0217	38.3444	37.3148	37.92	33.356	37.4921	38.889	38.6533	38.508	37.718	37.92	33.356	37.4921	38.889	38.4111	37.5166	38.5019	37.7363	37.92	34.2644
37.96	36.6644	38.5504	38.6714	38.2533	37.5898	37.96	35.8369	39.0217	39.5392	38.9373	38.8769	38.617	37.96	35.8369	39.0217	39.5392	38.7802	38.2412	37.8581		37.96	30.9229	37.2169	38.1319	37.2414	36.5721	37.96	33.337	37.541	39.0036	38.3807	37.3332	37.96	33.337	37.541	38.9071	38.5988	38.5262	37.6814	37.96	33.337	37.541	38.9071	38.3989	37.5288	38.5443	37.852	37.96	34.2519
38	36.6582	38.5807	38.6714	38.2351	37.7363	38	35.8369	39.0941	39.5452	38.9916	38.9433	38.5564	38	35.8369	39.0941	39.5452	38.8467	38.2776	37.8886		38	30.8451	37.2352	38.1562	37.2352	36.5721	38	33.375	37.5471	38.9976	38.3807	37.3332	38	33.375	37.5471	38.9795	38.6714	38.5322	37.6326	38	33.375	37.5471	38.9795	38.405	37.5471	38.5262	37.8642	38	34.2581
38.04	36.6275	38.5504	38.6593	38.2412	37.6997	38.04	35.7811	39.0338	39.5632	38.9916	39.0097	38.5928	38.04	35.7811	39.0338	39.5632	38.8105	38.2594	37.9373		38.04	30.8581	37.223	38.1683	37.2475	36.5105	38.04	33.3623	37.4432	39.0338	38.3504	37.3332	38.04	33.3623	37.4432	39.0217	38.617	38.5443	37.718	38.04	33.3623	37.4432	39.0217	38.3565	37.541	38.4898	37.8094	38.04	34.233
38.08	36.5782	38.5141	38.6593	38.1987	37.6082	38.08	35.8431	39.0217	39.5332	39.0398	39.0157	38.6351	38.08	35.8431	39.0217	39.5332	38.8467	38.2958	37.9434		38.08	30.7739	37.2597	38.1926	37.2352	36.5474	38.08	33.3623	37.4677	39.0157	38.3868	37.3454	38.08	33.3623	37.4677	39.0157	38.617	38.5383	37.5105	38.08	33.3623	37.4677	39.0157	38.3383	37.5715	38.4959	37.8581	38.08	34.2958
38.12	36.6336	38.5262	38.6412	38.2958	37.6204	38.12	35.8865	39.0036	39.5812	38.9795	38.9493	38.7258	38.12	35.8865	39.0036	39.5812	38.8286	38.2837	37.8459		38.12	30.7933	37.2536	38.1866	37.2352	36.5043	38.12	33.3497	37.486	39.0097	38.4656	37.3454	38.12	33.3497	37.486	38.9855	38.5625	38.5019	37.5166	38.12	33.3497	37.486	38.9855	38.3383	37.6326	38.4292	37.8764	38.12	34.3524
38.16	36.5597	38.4898	38.6412	38.3262	37.6265	38.16	35.8989	39.0277	39.6772	38.9795	38.9614	38.6593	38.16	35.8989	39.0277	39.6772	38.8105	38.3322	37.8642		38.16	30.7803	37.2475	38.1866	37.1985	36.5351	38.16	33.394	37.4127	39.076	38.4474	37.4127	38.16	33.394	37.4127	39.0097	38.5625	38.5928	37.5593	38.16	33.394	37.4127	39.0097	38.3747	37.5654	38.4474	37.8764	38.16	34.2393
38.2	36.6767	38.5564	38.6472	38.2533	37.6204	38.2	35.8679	39.0579	39.6772	39.1784	39.0519	38.6654	38.2	35.8679	39.0579	39.6772	38.8286	38.3686	37.9738		38.2	30.8257	37.2842	38.2776	37.2108	36.5782	38.2	33.356	37.5105	39.0277	38.4535	37.3821	38.2	33.356	37.5105	38.9554	38.6351	38.5019	37.5532	38.2	33.356	37.5105	38.9554	38.4474	37.6082	38.4535	37.8216	38.2	34.2833
38.24	36.7013	38.5867	38.6835	38.2473	37.6082	38.24	35.8493	39.088	39.5752	39.1664	38.9916	38.75	38.24	35.8493	39.088	39.5752	38.9674	38.3383	37.9799		38.24	30.994	37.2659	38.2412	37.1679	36.5228	38.24	33.3813	37.5593	39.0398	38.4656	37.4127	38.24	33.3813	37.5593	38.9735	38.6351	38.4959	37.5898	38.24	33.3813	37.5593	38.9735	38.4535	37.6265	38.5262	37.8642	38.24	34.2833
38.28	36.7259	38.6049	38.7077	38.2837	37.6448	38.28	35.8431	39.1061	39.5692	39.1061	38.9916	38.7198	38.28	35.8431	39.1061	39.5692	38.9131	38.3322	37.9068		38.28	30.9229	37.2475	38.1866	37.3148	36.529	38.28	33.356	37.541	39.0579	38.4777	37.486	38.28	33.356	37.541	38.9493	38.6714	38.508	37.6082	38.28	33.356	37.541	38.9493	38.4353	37.5898	38.5504	37.9129	38.28	34.2896
38.32	36.7444	38.6472	38.6835	38.3262	37.6997	38.32	35.8865	39.1182	39.6112	39.1121	39.0097	38.7742	38.32	35.8865	39.1182	39.6112	38.889	38.308	37.9434		38.32	30.9617	37.2842	38.1866	37.3393	36.529	38.32	33.4067	37.5532	39.0458	38.5564	37.4677	38.32	33.4067	37.5532	38.9493	38.6533	38.5262	37.6997	38.32	33.4067	37.5532	38.9493	38.4959	37.6082	38.508	37.9799	38.32	34.3398
38.36	36.6029	38.6291	38.7561	38.2473	37.7789	38.36	35.8989	39.1302	39.6412	39.0941	39.0398	38.744	38.36	35.8989	39.1302	39.6412	38.9373	38.308	37.986		38.36	31.0587	37.2842	38.2169	37.3576	36.529	38.36	33.394	37.5105	39.076	38.5322	37.4494	38.36	33.394	37.5105	38.9976	38.7198	38.5443	37.6387	38.36	33.394	37.5105	38.9976	38.4838	37.5776	38.5504	37.9008	38.36	34.3272
38.4	36.6644	38.6714	38.7379	38.2351	37.7424	38.4	35.9051	39.1302	39.6592	39.0579	39.0458	38.75	38.4	35.9051	39.1302	39.6592	38.9071	38.2776	38.0042		38.4	30.8646	37.2842	38.223	37.3576	36.5659	38.4	33.4256	37.5898	39.088	38.5262	37.4249	38.4	33.4256	37.5898	39.0097	38.5383	38.5928	37.5837	38.4	33.4256	37.5898	39.0097	38.5443	37.6082	38.5564	37.8338	38.4	34.3335
38.44	36.7813	38.6654	38.7319	38.314	37.7241	38.44	35.8989	39.1001	39.6532	39.07	39.082	38.744	38.44	35.8989	39.1001	39.6532	38.9312	38.3019	38.0225		38.44	30.884	37.2291	38.2473	37.3454	36.529	38.44	33.4383	37.5349	39.1182	38.5262	37.4921	38.44	33.4383	37.5349	39.0458	38.5383	38.617	37.6204	38.44	33.4383	37.5349	39.0458	38.4474	37.5593	38.5564	37.9008	38.44	34.2896
38.48	36.7505	38.6835	38.7138	38.2776	37.7058	38.48	35.9236	39.088	39.6712	39.07	39.0639	38.7682	38.48	35.9236	39.088	39.6712	38.9493	38.2715	38.0042		38.48	30.7868	37.1862	38.2473	37.4004	36.5413	38.48	33.432	37.541	39.0398	38.4717	37.541	38.48	33.432	37.541	38.9795	38.6896	38.6049	37.6509	38.48	33.432	37.541	38.9795	38.4656	37.5593	38.6049	37.9068	38.48	34.2079
38.52	36.6829	38.6956	38.7923	38.2898	37.7119	38.52	35.8803	39.082	39.6292	39.0639	39.1362	38.7017	38.52	35.8803	39.082	39.6292	38.9312	38.3444	37.9981		38.52	30.7868	37.3393	38.144	37.3454	36.5413	38.52	33.394	37.5837	39.082	38.4717	37.5471	38.52	33.394	37.5837	38.9976	38.7017	38.5686	37.6387	38.52	33.394	37.5837	38.9976	38.508	37.5532	38.5625	37.9068	38.52	34.2958
38.56	36.6152	38.7017	38.7682	38.405	37.7058	38.56	35.8493	39.07	39.6112	39.0639	39.1423	38.744	38.56	35.8493	39.07	39.6112	38.9916	38.3201	37.9981		38.56	30.8322	37.3882	38.2776	37.3699	36.5536	38.56	33.4003	37.5532	39.1182	38.5686	37.5532	38.56	33.4003	37.5532	38.9674	38.7077	38.6412	37.7363	38.56	33.4003	37.5532	38.9674	38.5322	37.6448	38.5141	37.9129	38.56	34.277
38.6	36.609	38.6835	38.7802	38.3626	37.7119	38.6	35.8307	39.1182	39.6352	39.2206	39.1603	38.75	38.6	35.8307	39.1182	39.6352	38.9674	38.3686	37.9677		38.6	30.8646	37.3271	38.2048	37.4004	36.5474	38.6	33.4446	37.5593	39.088	38.4717	37.5166	38.6	33.4446	37.5593	38.9312	38.6654	38.6654	37.6814	38.6	33.4446	37.5593	38.9312	38.5262	37.7119	38.5746	37.992	38.6	34.3021
38.64	36.7075	38.6896	38.75	38.3444	37.6509	38.64	35.8431	39.1724	39.6772	39.1182	39.1182	38.7379	38.64	35.8431	39.1724	39.6772	38.9976	38.3504	37.992		38.64	30.897	37.272	38.3019	37.4555	36.492	38.64	33.4826	37.5349	39.0458	38.405	37.4616	38.64	33.4826	37.5349	39.0338	38.7621	38.6049	37.6631	38.64	33.4826	37.5349	39.0338	38.4838	37.7667	38.5867	38.065	38.64	34.3084
38.72	36.5166	38.6714	38.75	38.3444	37.7058	38.72	35.936	39.1001	39.6472	39.1061	39.1061	38.7379	38.72	35.936	39.1001	39.6472	38.9795	38.3504	38.0711		38.72	30.735	37.2781	38.1866	37.3209	36.5597	38.72	33.4953	37.5227	39.0217	38.4292	37.4555	38.72	33.4953	37.5227	39.0458	38.7017	38.6109	37.6997	38.72	33.4953	37.5227	39.0458	38.4717	37.6448	38.5867	38.1015	38.72	34.2267
38.76	36.5905	38.7198	38.75	38.3807	37.6875	38.76	35.8741	39.1302	39.6832	39.1242	39.1302	38.7258	38.76	35.8741	39.1302	39.6832	38.9252	38.3747	38.0954		38.76	30.8257	37.3393	38.1926	37.2842	36.5597	38.76	33.5522	37.5715	39.0519	38.4111	37.4616	38.76	33.5522	37.5715	39.0398	38.6896	38.5807	37.7241	38.76	33.5522	37.5715	39.0398	38.4414	37.6448	38.5807	38.0285	38.76	34.1953
38.8	36.7198	38.7319	38.8165	38.4171	37.7789	38.8	35.9051	39.1362	39.7552	39.1664	39.1603	38.8407	38.8	35.9051	39.1362	39.7552	38.9554	38.3686	38.0954		38.8	30.7933	37.3332	38.1866	37.3148	36.5782	38.8	33.5964	37.5715	39.1543	38.4777	37.4677	38.8	33.5964	37.5715	39.1302	38.7258	38.5746	37.7241	38.8	33.5964	37.5715	39.1302	38.508	37.6753	38.6593	37.986	38.8	34.2016
38.84	36.7321	38.7198	38.8467	38.4414	37.7911	38.84	35.9979	39.2206	39.7372	39.1483	39.2145	38.8286	38.84	35.9979	39.2206	39.7372	38.9493	38.4111	38.0954		38.84	30.8646	37.3576	38.1987	37.3332	36.6152	38.84	33.4953	37.6387	39.1543	38.4535	37.4982	38.84	33.4953	37.6387	39.1362	38.7621	38.6351	37.7241	38.84	33.4953	37.6387	39.1362	38.5564	37.7302	38.6533	38.0042	38.84	34.233
38.88	36.7259	38.7379	38.8044	38.4959	37.8277	38.88	35.967	39.2145	39.7492	39.1664	39.1965	38.8165	38.88	35.967	39.2145	39.7492	39.0036	38.4595	38.065		38.88	30.9164	37.3087	38.3201	37.3943	36.5905	38.88	33.5522	37.6875	39.1664	38.4959	37.5776	38.88	33.5522	37.6875	39.1362	38.8105	38.7319	37.7789	38.88	33.5522	37.6875	39.1362	38.5564	37.7241	38.6593	38.0529	38.88	34.2393
38.92	36.7874	38.6533	38.7802	38.5262	37.8033	38.92	35.9979	39.2266	39.7911	39.1483	39.1664	38.8225	38.92	35.9979	39.2266	39.7911	39.0097	38.3929	38.1258		38.92	30.9099	37.3087	38.308	37.4066	36.529	38.92	33.5522	37.6509	39.1543	38.4959	37.5166	38.92	33.5522	37.6509	39.1302	38.7984	38.7138	37.7545	38.92	33.5522	37.6509	39.1302	38.5686	37.7363	38.6654	38.0225	38.92	34.277
38.96	36.7813	38.6472	38.7923	38.5262	37.8277	38.96	36.0041	39.2025	39.7911	39.1543	39.2145	38.8709	38.96	36.0041	39.2025	39.7911	39.0277	38.3807	38.1623		38.96	30.8905	37.2903	38.2048	37.4616	36.6644	38.96	33.5459	37.6692	39.1664	38.5262	37.5654	38.96	33.5459	37.6692	39.1302	38.8286	38.75	37.7424	38.96	33.5459	37.6692	39.1302	38.5443	37.785	38.6412	38.0285	38.96	34.321
39	36.7136	38.6714	38.7863	38.4959	37.8399	39	35.967	39.2747	39.6952	39.1844	39.2025	38.8588	39	35.967	39.2747	39.6952	39.0639	38.3686	38.144		39	30.9164	37.2842	38.314	37.3821	36.6521	39	33.5522	37.6753	39.1904	38.5201	37.5349	39	33.5522	37.6753	39.1302	38.8346	38.7561	37.7119	39	33.5522	37.6753	39.1302	38.6351	37.7363	38.6412	38.0468	39	34.3649
39.04	36.7382	38.7319	38.8346	38.4959	37.8825	39.04	35.967	39.2687	39.6412	39.1543	39.1242	38.8527	39.04	35.967	39.2687	39.6412	39.0941	38.4474	38.2594		39.04	30.9293	37.2536	38.2898	37.3821	36.7013	39.04	33.5522	37.6875	39.1844	38.5746	37.5654	39.04	33.5522	37.6875	39.1362	38.7984	38.7682	37.7789	39.04	33.5522	37.6875	39.1362	38.6291	37.7058	38.6472	38.0042	39.04	34.4088
39.08	36.7567	38.7319	38.8286	38.6654	37.9068	39.08	35.9732	39.2627	39.7192	39.2507	39.1904	38.9131	39.08	35.9732	39.2627	39.7192	39.1543	38.4292	38.1926		39.08	31.0393	37.3148	38.2898	37.5166	36.6767	39.08	33.5522	37.5776	39.2326	38.5928	37.5898	39.08	33.5522	37.5776	39.1001	38.7984	38.8225	37.785	39.08	33.5522	37.5776	39.1001	38.6291	37.718	38.5867	38.0529	39.08	34.3272
39.12	36.6706	38.7198	38.7984	38.623	37.9312	39.12	35.9794	39.2627	39.7132	39.1844	39.2085	38.8769	39.12	35.9794	39.2627	39.7132	39.1242	38.3747	38.1137		39.12	31.0458	37.3393	38.2655	37.5288	36.6029	39.12	33.5332	37.6082	39.3229	38.5746	37.5471	39.12	33.5332	37.6082	39.0097	38.8346	38.8165	37.6875	39.12	33.5332	37.6082	39.0097	38.75	37.7728	38.6533	38.0833	39.12	34.3084
39.16	36.6829	38.7258	38.9252	38.623	37.9373	39.16	36.0041	39.2988	39.7192	39.1603	39.2326	38.9131	39.16	36.0041	39.2988	39.7192	39.1242	38.4111	38.1137		39.16	31.0393	37.3148	38.2655	37.5105	36.6829	39.16	33.5648	37.5959	39.3048	38.6049	37.5654	39.16	33.5648	37.5959	39.0277	38.7621	38.7863	37.7485	39.16	33.5648	37.5959	39.0277	38.7077	37.7485	38.7258	38.1258	39.16	34.3021
39.2	36.8058	38.744	38.9614	38.5322	37.9008	39.2	36.0103	39.2807	39.7552	39.2206	39.2206	38.9071	39.2	36.0103	39.2807	39.7552	39.1664	38.4353	38.1197		39.2	31.0264	37.2965	38.3383	37.5166	36.6706	39.2	33.5522	37.5776	39.2085	38.6351	37.6143	39.2	33.5522	37.5776	39.1965	38.7682	38.7561	37.8033	39.2	33.5522	37.5776	39.1965	38.5928	37.7911	38.7561	38.0285	39.2	34.39
39.24	36.7751	38.744	38.9554	38.5201	37.919	39.24	36.0041	39.2988	39.7671	39.2266	39.1965	38.9131	39.24	36.0041	39.2988	39.7671	39.1302	38.4898	38.1683		39.24	30.994	37.3576	38.3383	37.4738	36.7444	39.24	33.647	37.5593	39.2567	38.6654	37.5898	39.24	33.647	37.5593	39.2025	38.7319	38.7621	37.8094	39.24	33.647	37.5593	39.2025	38.6775	37.7545	38.7561	38.0407	39.24	34.3398
39.28	36.7567	38.7923	38.9976	38.5867	37.8886	39.28	36.0474	39.3168	39.7791	39.2507	39.1423	38.8346	39.28	36.0474	39.3168	39.7791	39.082	38.5141	38.1744		39.28	31.0199	37.3638	38.3747	37.4921	36.7628	39.28	33.6154	37.657	39.3108	38.6654	37.6509	39.28	33.6154	37.657	39.2928	38.8165	38.7258	37.8581	39.28	33.6154	37.657	39.2928	38.5928	37.7911	38.75	37.9799	39.28	34.3335
39.32	36.7567	38.7379	38.9855	38.5988	37.9129	39.32	36.0413	39.2868	39.851	39.2988	39.1844	38.8648	39.32	36.0413	39.2868	39.851	39.0941	38.5262	38.1258		39.32	31.0523	37.2965	38.3504	37.4982	36.7382	39.32	33.6343	37.6326	39.4431	38.617	37.6204	39.32	33.6343	37.6326	39.2507	38.8407	38.744	37.9068	39.32	33.6343	37.6326	39.2507	38.744	37.7972	38.7258	38.065	39.32	34.3963
39.36	36.7013	38.8165	38.9373	38.5867	37.9555	39.36	36.1155	39.2868	39.845	39.2507	39.2025	38.9131	39.36	36.1155	39.2868	39.845	39.07	38.4959	38.1076		39.36	31.0587	37.3209	38.3201	37.4982	36.7567	39.36	33.6027	37.6326	39.2747	38.617	37.6387	39.36	33.6027	37.6326	39.2446	38.9312	38.7258	37.919	39.36	33.6027	37.6326	39.2446	38.5867	37.7972	38.7802	38.0954	39.36	34.4214
39.4	36.8181	38.7258	38.9312	38.5807	37.9616	39.4	36.0413	39.2687	39.833	39.3349	39.2386	38.9131	39.4	36.0413	39.2687	39.833	39.1001	38.4898	38.1258		39.4	31.0135	37.376	38.3201	37.4921	36.7444	39.4	33.6217	37.6326	39.2868	38.617	37.6387	39.4	33.6217	37.6326	39.2868	38.8467	38.7561	37.9129	39.4	33.6217	37.6326	39.2868	38.5867	37.7667	38.7379	38.0772	39.4	34.4339
39.44	36.7321	38.7742	38.9554	38.5625	37.9373	39.44	36.0165	39.2687	39.8211	39.371	39.2145	38.8769	39.44	36.0165	39.2687	39.8211	39.1302	38.4777	38.1137		39.44	31.0523	37.376	38.3019	37.5288	36.7813	39.44	33.6217	37.7241	39.3229	38.7077	37.6692	39.44	33.6217	37.7241	39.2807	38.8769	38.7863	37.8399	39.44	33.6217	37.7241	39.2807	38.6351	37.7667	38.7984	38.065	39.44	34.3398
39.48	36.7321	38.8346	38.8407	38.5564	37.9434	39.48	35.9794	39.2988	39.8091	39.2507	39.1965	38.8527	39.48	35.9794	39.2988	39.8091	39.1664	38.4838	38.1744		39.48	31.0199	37.3699	38.3807	37.5593	36.7628	39.48	33.6596	37.7241	39.377	38.7017	37.6082	39.48	33.6596	37.7241	39.2386	38.8588	38.8407	37.8155	39.48	33.6596	37.7241	39.2386	38.7319	37.7972	38.8165	38.0529	39.48	34.3084
39.52	36.7628	38.8286	38.9071	38.5686	37.9312	39.52	35.9856	39.3168	39.881	39.2326	39.1242	38.9674	39.52	35.9856	39.3168	39.881	39.2025	38.4474	38.2473		39.52	31.0135	37.3699	38.3565	37.6265	36.7997	39.52	33.5964	37.6936	39.3289	38.6593	37.5593	39.52	33.5964	37.6936	39.1965	38.8709	38.8165	37.8459	39.52	33.5964	37.6936	39.1965	38.7319	37.7972	38.8648	38.1015	39.52	34.3147
39.6	36.6767	38.8225	38.8769	38.5807	37.992	39.6	36.0041	39.3048	39.881	39.2868	39.2025	38.9433	39.6	36.0041	39.3048	39.881	39.1784	38.5262	38.1866		39.6	31.0199	37.3821	38.4111	37.6143	36.7813	39.6	33.5269	37.6631	39.1904	38.6472	37.5715	39.6	33.5269	37.6631	39.3289	38.9433	38.8044	37.8642	39.6	33.5269	37.6631	39.3289	38.6472	37.7728	38.8709	38.1926	39.6	34.3272
39.64	36.7444	38.8225	38.9192	38.5928	38.0772	39.64	36.0413	39.383	39.8869	39.2988	39.1423	38.9252	39.64	36.0413	39.383	39.8869	39.2085	38.5807	38.1501		39.64	31.1104	37.3882	38.3686	37.5105	36.7136	39.64	33.6027	37.6692	39.1844	38.6956	37.5837	39.64	33.6027	37.6692	39.2807	38.9433	38.7984	37.8764	39.64	33.6027	37.6692	39.2807	38.6472	37.7424	38.8829	38.1562	39.64	34.4402
39.68	36.812	38.8648	38.9976	38.6291	38.0103	39.68	36.0536	39.2386	39.869	39.3289	39.2266	39.0157	39.68	36.0536	39.2386	39.869	39.1784	38.5625	38.1623		39.68	31.0975	37.3515	38.3686	37.5471	36.7505	39.68	33.5648	37.8033	39.1423	38.7379	37.6143	39.68	33.5648	37.8033	39.2507	38.9192	38.8588	37.9008	39.68	33.5648	37.8033	39.2507	38.6956	37.7302	38.8467	38.138	39.68	34.4214
39.72	36.812	38.8527	39.0941	38.623	37.986	39.72	36.0413	39.2868	39.881	39.377	39.2266	39.0458	39.72	36.0413	39.2868	39.881	39.1543	38.5201	38.1805		39.72	31.0199	37.3271	38.3444	37.5349	36.7382	39.72	33.5395	37.7606	39.2206	38.7379	37.6448	39.72	33.5395	37.7606	39.2206	38.8829	38.8467	37.9981	39.72	33.5395	37.7606	39.2206	38.7138	37.7424	38.9131	38.1501	39.72	34.4088
39.76	36.6829	38.8105	39.088	38.6351	37.9555	39.76	36.0722	39.2747	39.875	39.3229	39.1904	39.0097	39.76	36.0722	39.2747	39.875	39.1423	38.5807	38.2108		39.76	31.0005	37.3943	38.3868	37.5593	36.7874	39.76	33.5459	37.6814	39.2446	38.7258	37.6692	39.76	33.5459	37.6814	39.2807	38.9071	38.8648	37.9799	39.76	33.5459	37.6814	39.2807	38.7017	37.7606	38.9312	38.1562	39.76	34.3524
39.8	36.6767	38.7742	39.082	38.617	37.9555	39.8	36.0103	39.2567	39.875	39.3229	39.2567	39.0036	39.8	36.0103	39.2567	39.875	39.1664	38.5807	38.1987		39.8	31.007	37.4188	38.3989	37.541	36.8611	39.8	33.6154	37.6814	39.2627	38.7379	37.6692	39.8	33.6154	37.6814	39.2988	38.9192	38.9071	37.9251	39.8	33.6154	37.6814	39.2988	38.6654	37.7728	38.8769	38.1683	39.8	34.39
39.84	36.7259	38.8286	39.0217	38.7077	38.0042	39.84	35.9856	39.2868	39.863	39.3469	39.3108	39.0338	39.84	35.9856	39.2868	39.863	39.1121	38.5686	38.308		39.84	31.0005	37.4188	38.3929	37.5227	36.898	39.84	33.6343	37.7302	39.2807	38.7138	37.6021	39.84	33.6343	37.7302	39.3048	38.8829	38.8648	38.0103	39.84	33.6343	37.7302	39.3048	38.5928	37.7485	38.895	38.1562	39.84	34.4339
39.88	36.8673	38.8467	38.9614	38.6593	37.919	39.88	36.0041	39.3289	39.7971	39.3589	39.3289	38.9976	39.88	36.0041	39.3289	39.7971	39.1543	38.5807	38.314		39.88	31.0458	37.4188	38.3444	37.5349	36.8796	39.88	33.6217	37.657	39.2807	38.6956	37.6326	39.88	33.6217	37.657	39.2687	38.9312	38.8588	38.0407	39.88	33.6217	37.657	39.2687	38.617	37.7972	38.8829	38.1015	39.88	34.3963
39.92	36.7259	38.895	38.9976	38.7802	37.9434	39.92	36.1711	39.3409	39.9468	39.5032	39.365	38.9735	39.92	36.1711	39.3409	39.9468	39.2025	38.5867	38.3019		39.92	31.1944	37.4004	38.3929	37.5288	36.8489	39.92	33.6217	37.6936	39.4131	38.75	37.6814	39.92	33.6217	37.6936	39.2868	38.9373	38.8709	37.9434	39.92	33.6217	37.6936	39.2868	38.6956	37.8094	38.889	38.2715	39.92	34.3775
39.96	36.7505	38.9071	39.0217	38.7621	37.9738	39.96	36.1835	39.3229	39.9887	39.4791	39.389	38.9493	39.96	36.1835	39.3229	39.9887	39.1664	38.6109	38.2776		39.96	31.0587	37.4188	38.3444	37.4921	36.8304	39.96	33.647	37.7241	39.401	38.7319	37.6997	39.96	33.647	37.7241	39.3108	39.0157	38.8588	37.9981	39.96	33.647	37.7241	39.3108	38.7682	37.8216	38.8829	38.2958	39.96	34.3963
40	36.7935	38.889	39.0217	38.7138	37.992	40	36.2143	39.3289	39.9588	39.4791	39.3168	38.9795	40	36.2143	39.3289	39.9588	39.1603	38.623	38.308		40	31.0329	37.5043	38.3989	37.5532	36.8058	40	33.5648	37.6631	39.401	38.6835	37.6936	40	33.5648	37.6631	39.2807	39.0458	38.895	37.9555	40	33.5648	37.6631	39.2807	38.8648	37.8155	38.8346	38.308	40	34.3398
40.04	36.7997	38.895	39.0579	38.7138	38.1197	40.04	36.1587	39.3529	39.9647	39.4191	39.2988	38.9493	40.04	36.1587	39.3529	39.9647	39.2025	38.6049	38.2837		40.04	31.1104	37.4555	38.3868	37.5593	36.8673	40.04	33.5838	37.6875	39.389	38.6835	37.6387	40.04	33.5838	37.6875	39.3048	39.0338	38.9433	37.9616	40.04	33.5838	37.6875	39.3048	38.7984	37.8703	38.8467	38.1866	40.04	34.4716
40.08	36.812	38.8527	39.07	38.7198	38.0285	40.08	36.1217	39.5032	39.9408	39.4551	39.389	38.9916	40.08	36.1217	39.5032	39.9408	39.2206	38.6109	38.3201		40.08	31.0652	37.4738	38.3686	37.5837	36.9164	40.08	33.5901	37.7972	39.371	38.6775	37.718	40.08	33.5901	37.7972	39.3108	38.9554	38.9433	38.0285	40.08	33.5901	37.7972	39.3108	38.7742	37.8399	38.8527	38.1744	40.08	34.4653
40.12	36.8673	38.895	39.1423	38.7198	38.1319	40.12	36.1587	39.4791	39.9707	39.4791	39.4791	39.1061	40.12	36.1587	39.4791	39.9707	39.2386	38.6049	38.2776		40.12	31.1298	37.486	38.4717	37.6509	36.8796	40.12	33.6786	37.8399	39.407	38.7138	37.7789	40.12	33.6786	37.8399	39.365	39.0338	38.9795	38.065	40.12	33.6786	37.8399	39.365	38.8044	37.8459	38.8709	38.2715	40.12	34.4402
40.16	36.9103	38.9192	39.1362	38.8105	38.1197	40.16	36.2761	39.5932	40.0305	39.6052	39.4671	39.0941	40.16	36.2761	39.5932	40.0305	39.2446	38.6835	38.3565		40.16	31.104	37.5043	38.5019	37.6936	36.8489	40.16	33.6407	37.8338	39.5152	38.8105	37.9555	40.16	33.6407	37.8338	39.4671	39.1483	39.0277	38.065	40.16	33.6407	37.8338	39.4671	38.9071	37.9738	39.0157	38.2776	40.16	34.4841
40.2	36.9041	38.9554	39.1242	38.8346	38.144	40.2	36.2946	39.4791	40.0545	39.5272	39.4731	39.07	40.2	36.2946	39.4791	40.0545	39.2687	38.7138	38.4111		40.2	31.2202	37.4616	38.5383	37.6509	36.8734	40.2	33.5964	37.919	39.4731	38.8286	37.9008	40.2	33.5964	37.919	39.4852	39.2326	39.082	38.065	40.2	33.5964	37.919	39.4852	38.8709	37.9616	38.9855	38.2594	40.2	34.6032
40.24	36.898	38.901	39.1724	38.8407	38.1683	40.24	36.2082	39.4731	40.0724	39.5032	39.4852	39.1603	40.24	36.2082	39.4731	40.0724	39.2807	38.7319	38.3807		40.24	31.2138	37.4982	38.4777	37.6448	36.9041	40.24	33.6722	37.9434	39.5212	38.9252	37.8764	40.24	33.6722	37.9434	39.4371	39.2326	39.0277	37.992	40.24	33.6722	37.9434	39.4371	38.9131	37.992	38.9976	38.3383	40.24	34.5594
40.28	36.9839	38.9312	39.1182	38.7802	38.0833	40.28	36.2205	39.4791	40.0425	39.4251	39.5092	39.1483	40.28	36.2205	39.4791	40.0425	39.2928	38.7923	38.405		40.28	31.2332	37.5227	38.5141	37.6997	36.8857	40.28	33.6786	37.9495	39.5452	38.7923	37.8703	40.28	33.6786	37.9495	39.4371	39.1362	39.076	38.0407	40.28	33.6786	37.9495	39.4371	38.901	38.0042	39.0458	38.2898	40.28	34.5468
40.32	36.9226	38.9614	39.076	38.7923	38.1015	40.32	36.2267	39.5452	40.0425	39.4611	39.5392	39.1664	40.32	36.2267	39.5452	40.0425	39.3469	38.7984	38.3807		40.32	31.2138	37.541	38.4717	37.7241	36.8611	40.32	33.7291	37.9373	39.5332	38.901	37.9495	40.32	33.7291	37.9373	39.4191	39.1603	39.082	38.0589	40.32	33.7291	37.9373	39.4191	38.9433	37.986	38.9674	38.3201	40.32	34.5656
40.36	36.9839	39.076	39.1724	38.8044	38.0954	40.36	36.2391	39.5092	40.0545	39.4731	39.5032	39.1603	40.36	36.2391	39.5092	40.0545	39.3529	38.8588	38.3626		40.36	31.2332	37.5471	38.5625	37.7667	36.855	40.36	33.7543	37.9616	39.5392	38.9554	37.9373	40.36	33.7543	37.9616	39.407	39.1603	39.0398	38.0893	40.36	33.7543	37.9616	39.407	39.0217	37.9129	39.0398	38.308	40.36	34.5594
40.44	37.0023	39.0277	39.1724	38.7984	38.1319	40.44	36.202	39.4371	40.0126	39.4912	39.4551	39.1904	40.44	36.202	39.4371	40.0126	39.407	38.8407	38.3504		40.44	31.1686	37.5776	38.5262	37.7667	36.941	40.44	33.7038	37.9312	39.4852	38.9312	37.9312	40.44	33.7038	37.9312	39.4371	39.1664	39.0157	38.1744	40.44	33.7038	37.9312	39.4371	38.9493	37.9373	39.0458	38.3383	40.44	34.5969
40.48	37.0453	38.9674	39.1423	38.7863	38.1623	40.48	36.2329	39.4311	40.0485	39.5272	39.4852	39.1844	40.48	36.2329	39.4311	40.0485	39.3409	38.8467	38.3201		40.48	31.2138	37.541	38.4535	37.785	36.9655	40.48	33.6912	37.8581	39.4671	39.0458	37.9068	40.48	33.6912	37.8581	39.4311	39.1664	38.9674	38.1805	40.48	33.6912	37.8581	39.4311	38.9493	37.9555	39.0639	38.3868	40.48	34.5719
40.52	36.9471	38.9554	39.2928	38.7258	38.1866	40.52	36.2452	39.4191	40.0126	39.4731	39.5212	39.2446	40.52	36.2452	39.4191	40.0126	39.371	38.901	38.3444		40.52	31.0846	37.5227	38.4595	37.6692	37.0023	40.52	33.7101	37.852	39.4852	39.0097	37.8338	40.52	33.7101	37.852	39.4371	39.1483	39.0036	38.2169	40.52	33.7101	37.852	39.4371	39.0157	37.9981	39.0157	38.3747	40.52	34.5656
40.56	37.033	38.9433	39.2386	38.744	38.1319	40.56	36.2699	39.4311	39.9647	39.5032	39.4852	39.2386	40.56	36.2699	39.4311	39.9647	39.401	38.8527	38.3201		40.56	31.0652	37.5227	38.5383	37.7424	37.0391	40.56	33.7291	37.8947	39.6052	39.0157	37.8764	40.56	33.7291	37.8947	39.4611	39.2206	39.0157	38.2108	40.56	33.7291	37.8947	39.4611	39.0036	37.9981	38.9976	38.3807	40.56	34.5656
40.6	37.0085	38.9916	39.2507	38.8286	38.1197	40.6	36.3193	39.4671	39.9408	39.5092	39.5812	39.2507	40.6	36.3193	39.4671	39.9408	39.389	38.8588	38.3565		40.6	31.1169	37.5532	38.5141	37.7728	37.0269	40.6	33.647	37.9251	39.5992	39.0097	37.9495	40.6	33.647	37.9251	39.4431	39.1543	39.0519	38.2473	40.6	33.647	37.9251	39.4431	38.9252	38.0407	38.9976	38.3868	40.6	34.6471
40.64	36.9471	38.9795	39.2507	38.8648	38.0954	40.64	36.3008	39.5572	39.9468	39.5152	39.6112	39.2085	40.64	36.3008	39.5572	39.9468	39.383	38.8105	38.3626		40.64	31.1557	37.5166	38.508	37.7789	37.0943	40.64	33.6596	37.9434	39.6112	39.0217	37.9129	40.64	33.6596	37.9434	39.4491	39.1061	39.1001	38.2412	40.64	33.6596	37.9434	39.4491	38.9192	38.0407	39.0277	38.4111	40.64	34.6345
40.68	36.9471	38.9554	39.2085	38.9554	38.1015	40.68	36.2823	39.5752	39.9947	39.5512	39.5272	39.1965	40.68	36.2823	39.5752	39.9947	39.371	38.8225	38.405		40.68	31.1298	37.5593	38.5383	37.7667	37.0943	40.68	33.6786	37.9251	39.6052	38.9735	37.9555	40.68	33.6786	37.9251	39.401	39.1362	39.0941	38.2473	40.68	33.6786	37.9251	39.401	38.9735	38.0468	39.07	38.4535	40.68	34.6283
40.72	36.9962	38.9312	39.2386	38.8709	38.1926	40.72	36.2514	39.5632	40.0485	39.5452	39.5512	39.1664	40.72	36.2514	39.5632	40.0485	39.3469	38.8165	38.5504		40.72	31.1104	37.5837	38.5928	37.8033	37.0882	40.72	33.6027	37.9373	39.5752	38.9554	37.986	40.72	33.6027	37.9373	39.4191	39.1664	39.0941	38.2291	40.72	33.6027	37.9373	39.4191	38.9373	38.065	39.0398	38.4292	40.72	34.5969
40.76	37.0391	39.0398	39.2807	38.8165	38.223	40.76	36.1587	39.5512	40.0186	39.5752	39.5572	39.1664	40.76	36.1587	39.5512	40.0186	39.365	38.8588	38.5019		40.76	31.104	37.5837	38.5867	37.7728	37.1188	40.76	33.628	37.919	39.5752	38.9976	37.9738	40.76	33.628	37.919	39.5152	39.1483	39.1001	38.2048	40.76	33.628	37.919	39.5152	38.9674	38.1805	39.07	38.405	40.76	34.6658
40.8	36.9839	39.082	39.2206	38.8527	38.1805	40.8	36.3131	39.5332	40.0724	39.5752	39.5872	39.2386	40.8	36.3131	39.5332	40.0724	39.3229	38.7319	38.4414		40.8	31.2332	37.5715	38.5867	37.7667	37.1127	40.8	33.628	37.9677	39.5392	38.9554	37.9616	40.8	33.628	37.9677	39.4551	39.1965	39.1423	38.1926	40.8	33.628	37.9677	39.4551	38.901	38.144	38.9614	38.3747	40.8	34.6971
40.84	36.9532	39.0338	39.2687	38.8648	38.1744	40.84	36.3316	39.4431	40.0305	39.5812	39.6532	39.2025	40.84	36.3316	39.4431	40.0305	39.3229	38.7923	38.4292		40.84	31.1944	37.5532	38.5988	37.7606	37.1005	40.84	33.6659	37.9677	39.4972	38.9614	37.9738	40.84	33.6659	37.9677	39.4972	39.1844	39.1423	38.1987	40.84	33.6659	37.9677	39.4972	38.9312	38.1623	39.1001	38.405	40.84	34.6721
40.88	36.9348	39.0036	39.2446	38.8588	38.1683	40.88	36.2143	39.4791	40.1202	39.5032	39.6592	39.2446	40.88	36.2143	39.4791	40.1202	39.2807	38.7802	38.4292		40.88	31.1686	37.4921	38.5928	37.7485	37.033	40.88	33.6596	37.9981	39.5212	38.9795	38.0042	40.88	33.6596	37.9981	39.4791	39.088	39.1724	38.2412	40.88	33.6596	37.9981	39.4791	38.9131	38.1258	39.1001	38.3868	40.88	34.6971
40.92	36.941	39.0157	39.1664	38.8467	38.1623	40.92	36.2514	39.4491	40.0903	39.4912	39.6532	39.2025	40.92	36.2514	39.4491	40.0903	39.2988	38.7742	38.4838		40.92	31.1815	37.4982	38.617	37.7789	37.0207	40.92	33.5838	37.9738	39.5212	38.9976	38.1197	40.92	33.5838	37.9738	39.5272	39.0941	39.1664	38.2958	40.92	33.5838	37.9738	39.5272	38.9312	38.1501	39.1001	38.3929	40.92	34.6596
40.96	36.9594	39.0519	39.2386	38.901	38.1926	40.96	36.2576	39.5692	40.0365	39.5392	39.6772	39.2025	40.96	36.2576	39.5692	40.0365	39.3289	38.8044	38.4838		40.96	31.1815	37.5227	38.623	37.7911	37.1372	40.96	33.6975	37.9555	39.5572	38.9795	38.0529	40.96	33.6975	37.9555	39.5812	39.1242	39.1423	38.223	40.96	33.6975	37.9555	39.5812	38.9192	38.1623	39.088	38.4535	40.96	34.6095
41	36.9103	38.9614	39.2868	38.9554	38.2655	41	36.2452	39.5692	39.9528	39.4912	39.6112	39.2025	41	36.2452	39.5692	39.9528	39.365	38.7863	38.508		41	31.2332	37.5593	38.617	37.7972	37.0759	41	33.7417	37.9981	39.5992	38.9855	38.0589	41	33.7417	37.9981	39.6112	39.1483	39.1182	38.2291	41	33.7417	37.9981	39.6112	38.9192	38.144	39.1302	38.4535	41	34.6032
41.04	36.9532	38.9373	39.2627	38.9373	38.2655	41.04	36.3687	39.5332	39.9827	39.5692	39.6532	39.1844	41.04	36.3687	39.5332	39.9827	39.3529	38.7802	38.5625		41.04	31.259	37.5837	38.617	37.7911	37.0821	41.04	33.7606	37.9677	39.6232	39.0036	37.9677	41.04	33.7606	37.9677	39.5392	39.2567	39.0941	38.1987	41.04	33.7606	37.9677	39.5392	38.895	38.1623	39.0458	38.4717	41.04	34.622
41.08	37.0146	39.0519	39.2085	38.9795	38.2776	41.08	36.2946	39.4972	40.0006	39.5812	39.6412	39.1483	41.08	36.2946	39.4972	40.0006	39.4191	38.7802	38.5141		41.08	31.2912	37.6021	38.6351	37.852	37.0698	41.08	33.7228	37.9616	39.6472	38.9674	38.0042	41.08	33.7228	37.9616	39.5392	39.2085	39.082	38.1683	41.08	33.7228	37.9616	39.5392	38.9071	38.0954	39.0277	38.508	41.08	34.6471
41.12	36.9962	39.07	39.2266	38.9373	38.2351	41.12	36.2576	39.4671	39.9947	39.5332	39.6412	39.1603	41.12	36.2576	39.4671	39.9947	39.401	38.8044	38.5141		41.12	31.2396	37.5837	38.6049	37.7972	37.1862	41.12	33.7417	37.9677	39.5572	38.9674	38.0164	41.12	33.7417	37.9677	39.5032	39.2145	39.0639	38.1866	41.12	33.7417	37.9677	39.5032	38.8709	38.1744	39.082	38.4838	41.12	34.6095
41.16	36.9901	39.07	39.2025	38.9192	38.2412	41.16	36.2884	39.4852	40.0365	39.4671	39.6292	39.1844	41.16	36.2884	39.4852	40.0365	39.383	38.7863	38.5019		41.16	31.2267	37.6265	38.6109	37.8216	37.1311	41.16	33.7354	37.9799	39.6052	38.9916	38.0346	41.16	33.7354	37.9799	39.5452	39.1724	39.07	38.1683	41.16	33.7354	37.9799	39.5452	38.8648	38.1562	39.1362	38.4959	41.16	34.6345
41.2	36.9287	39.0338	39.1664	38.9071	38.2412	41.2	36.1958	39.4671	40.0784	39.5692	39.6292	39.2747	41.2	36.1958	39.4671	40.0784	39.389	38.8407	38.5141		41.2	31.1686	37.6143	38.6412	37.852	37.1617	41.2	33.7985	37.9738	39.5932	38.9916	38.0103	41.2	33.7985	37.9738	39.5272	39.1784	39.07	38.1866	41.2	33.7985	37.9738	39.5272	38.889	38.1258	39.1302	38.508	41.2	34.5782
41.24	36.941	39.076	39.2145	38.901	38.3019	41.24	36.1835	39.4731	40.1142	39.5752	39.6172	39.2446	41.24	36.1835	39.4731	40.1142	39.389	38.8467	38.5019		41.24	31.188	37.6143	38.6412	37.8886	37.174	41.24	33.7796	37.9251	39.5812	38.9976	38.0407	41.24	33.7796	37.9251	39.5752	39.2326	39.0579	38.2169	41.24	33.7796	37.9251	39.5752	38.9795	38.1015	39.1182	38.5141	41.24	34.6095
41.32	36.9041	39.1001	39.1603	38.9252	38.3201	41.32	36.2205	39.371	40.1142	39.5872	39.6472	39.2687	41.32	36.2205	39.371	40.1142	39.383	38.8527	38.5504		41.32	31.1621	37.5776	38.744	37.8764	37.1862	41.32	33.767	37.9434	39.6052	38.9855	38.0529	41.32	33.767	37.9434	39.5512	39.2747	39.1121	38.2533	41.32	33.767	37.9434	39.5512	38.9795	38.144	39.1182	38.5019	41.32	34.6721
41.36	36.9226	39.1061	39.2326	39.0036	38.2958	41.36	36.1958	39.5392	40.1321	39.5452	39.6412	39.2687	41.36	36.1958	39.5392	40.1321	39.3529	38.895	38.4959		41.36	31.2073	37.5227	38.7258	37.852	37.1862	41.36	33.8237	37.919	39.6472	39.0519	38.0225	41.36	33.8237	37.919	39.5932	39.2326	39.1603	38.2655	41.36	33.8237	37.919	39.5932	38.9976	38.144	39.1061	38.4717	41.36	34.6283
41.4	36.9717	39.0941	39.2868	38.9614	38.2412	41.4	36.2699	39.5272	40.2396	39.5452	39.6652	39.3048	41.4	36.2699	39.5272	40.2396	39.401	38.8527	38.5262		41.4	31.188	37.5654	38.6775	37.9312	37.1495	41.4	33.8048	37.9799	39.6172	39.082	38.0164	41.4	33.8048	37.9799	39.6172	39.1965	39.2085	38.2776	41.4	33.8048	37.9799	39.6172	39.0338	38.1076	39.0519	38.5141	41.4	34.6533
41.44	37.0146	39.1302	39.377	38.9312	38.2291	41.44	36.307	39.5692	40.162	39.6532	39.6232	39.3168	41.44	36.307	39.5692	40.162	39.4251	38.8769	38.5383		41.44	31.1621	37.5471	38.6714	37.9312	37.1862	41.44	33.767	38.0164	39.5992	39.0941	38.0285	41.44	33.767	38.0164	39.5812	39.2025	39.2206	38.2898	41.44	33.767	38.0164	39.5812	39.0277	38.2351	39.088	38.3868	41.44	34.6533
41.48	37.0391	39.1001	39.3168	38.9192	38.2594	41.48	36.2884	39.5572	40.1023	39.5872	39.6412	39.395	41.48	36.2884	39.5572	40.1023	39.4671	38.8467	38.5807		41.48	31.2654	37.6143	38.6835	37.8277	37.2291	41.48	33.8679	38.0042	39.6112	39.0579	38.0042	41.48	33.8679	38.0042	39.5272	39.2266	39.2928	38.2776	41.48	33.8679	38.0042	39.5272	38.9916	38.1805	39.0338	38.4898	41.48	34.6283
41.52	37.0146	39.1784	39.365	38.9554	38.2594	41.52	36.2452	39.5632	40.1142	39.5932	39.6172	39.383	41.52	36.2452	39.5632	40.1142	39.4431	38.889	38.5686		41.52	31.2202	37.5898	38.6351	37.8642	37.2169	41.52	33.8931	38.0711	39.6412	39.0097	38.0468	41.52	33.8931	38.0711	39.6232	39.2567	39.2206	38.3444	41.52	33.8931	38.0711	39.6232	39.0157	38.1562	38.9373	38.5201	41.52	34.6909
41.56	37.0391	39.1483	39.2747	38.9735	38.2412	41.56	36.3193	39.5332	40.0843	39.6052	39.6832	39.2807	41.56	36.3193	39.5332	40.0843	39.4671	38.8588	38.6109		41.56	31.2396	37.6326	38.6654	37.8825	37.1801	41.56	33.8237	38.0042	39.5812	39.076	38.0529	41.56	33.8237	38.0042	39.5992	39.2025	39.1965	38.4414	41.56	33.8237	38.0042	39.5992	38.9614	38.1866	39.0338	38.5443	41.56	34.6909
41.6	37.033	39.1784	39.3409	39.0338	38.2351	41.6	36.3378	39.5812	40.0843	39.6292	39.6832	39.3349	41.6	36.3378	39.5812	40.0843	39.4371	38.8407	38.5504		41.6	31.2654	37.6387	38.7077	37.9981	37.1679	41.6	33.849	38.0103	39.6052	39.07	38.0407	41.6	33.849	38.0103	39.6592	39.1483	39.2446	38.3686	41.6	33.849	38.0103	39.6592	39.0639	38.1987	39.082	38.5625	41.6	34.6784
41.64	36.9962	39.1965	39.3529	38.9614	38.3444	41.64	36.418	39.5452	40.1023	39.6472	39.7012	39.371	41.64	36.418	39.5452	40.1023	39.5152	38.9373	38.5383		41.64	31.2461	37.6875	38.617	37.9495	37.1617	41.64	33.8111	38.0164	39.6172	39.0398	38.0893	41.64	33.8111	38.0164	39.6592	39.2627	39.2085	38.3262	41.64	33.8111	38.0164	39.6592	39.1182	38.1501	39.0398	38.5443	41.64	34.6909
41.68	37.0023	39.1784	39.401	38.9493	38.2898	41.68	36.3872	39.5752	40.1023	39.6112	39.7552	39.377	41.68	36.3872	39.5752	40.1023	39.5392	38.9433	38.5322		41.68	31.2461	37.6448	38.5686	37.9434	37.1311	41.68	33.8174	37.9677	39.7132	39.0097	38.0468	41.68	33.8174	37.9677	39.6712	39.2627	39.1904	38.3322	41.68	33.8174	37.9677	39.6712	39.1061	38.1137	39.0277	38.5443	41.68	34.6971
41.72	37.0882	39.1784	39.2928	38.9795	38.314	41.72	36.3625	39.5812	40.0724	39.6352	39.7671	39.3469	41.72	36.3625	39.5812	40.0724	39.4311	38.9071	38.508		41.72	31.2073	37.6814	38.508	37.9799	37.1862	41.72	33.83	38.0407	39.7252	39.0458	38.0042	41.72	33.83	38.0407	39.6412	39.3048	39.1904	38.2898	41.72	33.83	38.0407	39.6412	39.1302	38.2958	39.0519	38.5988	41.72	34.7284
41.76	37.0391	39.1543	39.2025	38.9252	38.2958	41.76	36.3748	39.6112	40.0724	39.6292	39.7552	39.3349	41.76	36.3748	39.6112	40.0724	39.4311	38.9312	38.5141		41.76	31.2461	37.6692	38.7077	37.9251	37.2169	41.76	33.8364	38.0285	39.7012	39.0941	38.144	41.76	33.8364	38.0285	39.6412	39.3108	39.2025	38.3019	41.76	33.8364	38.0285	39.6412	39.1664	38.1987	39.1603	38.5686	41.76	34.7972
41.8	37.0391	39.1483	39.3589	38.9312	38.3747	41.8	36.381	39.5092	40.0963	39.6352	39.7072	39.3108	41.8	36.381	39.5092	40.0963	39.4431	38.9071	38.5322		41.8	31.2848	37.657	38.7077	37.9251	37.1679	41.8	33.849	38.0225	39.7372	39.0458	38.1076	41.8	33.849	38.0225	39.6352	39.3108	39.1904	38.314	41.8	33.849	38.0225	39.6352	39.07	38.138	39.1242	38.5322	41.8	34.766
41.84	36.9778	39.1603	39.3048	38.9493	38.3747	41.84	36.3872	39.5032	40.0843	39.6292	39.6952	39.2928	41.84	36.3872	39.5032	40.0843	39.4191	38.9976	38.5867		41.84	31.2461	37.6448	38.7077	37.9677	37.2169	41.84	33.8048	37.9981	39.7312	39.0941	38.138	41.84	33.8048	37.9981	39.6172	39.3048	39.2446	38.2837	41.84	33.8048	37.9981	39.6172	39.1242	38.1926	39.1061	38.5201	41.84	34.7472
41.88	37.0085	39.1664	39.4311	39.0157	38.4111	41.88	36.3625	39.5272	40.0843	39.6592	39.7252	39.377	41.88	36.3625	39.5272	40.0843	39.389	38.9855	38.5746		41.88	31.1815	37.7485	38.6835	37.9616	37.2108	41.88	33.83	37.9799	39.6952	39.0639	38.1926	41.88	33.83	37.9799	39.6652	39.3048	39.2085	38.3747	41.88	33.83	37.9799	39.6652	39.1302	38.1866	39.1423	38.5564	41.88	34.7409
41.92	37.0146	39.1302	39.4311	39.0217	38.4414	41.92	36.381	39.5512	40.1262	39.6472	39.6592	39.3589	41.92	36.381	39.5512	40.1262	39.5032	38.9312	38.5867		41.92	31.2073	37.7058	38.6351	37.9738	37.1924	41.92	33.8174	37.9616	39.6832	39.088	38.3019	41.92	33.8174	37.9616	39.6592	39.3229	39.2747	38.4838	41.92	33.8174	37.9616	39.6592	39.1904	38.1866	39.2206	38.5322	41.92	34.7535
41.96	37.0698	39.1182	39.401	39.0579	38.4292	41.96	36.3687	39.5212	40.0903	39.6412	39.6712	39.377	41.96	36.3687	39.5212	40.0903	39.5872	38.901	38.5019		41.96	31.2461	37.6692	38.6412	37.9677	37.174	41.96	33.849	37.986	39.6832	39.0398	38.2412	41.96	33.849	37.986	39.6532	39.3108	39.2988	38.4232	41.96	33.849	37.986	39.6532	39.2206	38.223	39.1904	38.5746	41.96	34.7409
42	37.0575	39.1121	39.383	39.0277	38.4414	42	36.3563	39.4912	40.1142	39.6472	39.6652	39.365	42	36.3563	39.4912	40.1142	39.5332	38.9312	38.4959		42	31.2783	37.6814	38.6593	37.9616	37.1679	42	33.8805	38.0042	39.7252	39.0519	38.1987	42	33.8805	38.0042	39.6472	39.383	39.3349	38.5322	42	33.8805	38.0042	39.6472	39.1844	38.2351	39.1965	38.5867	42	34.7347
42.04	37.0759	39.1423	39.4191	39.0097	38.4111	42.04	36.3193	39.5032	40.0963	39.6712	39.6952	39.383	42.04	36.3193	39.5032	40.0963	39.5272	38.9373	38.623		42.04	31.259	37.7119	38.6775	37.9616	37.1372	42.04	33.83	38.0407	39.6952	39.082	38.1562	42.04	33.83	38.0407	39.6592	39.365	39.2747	38.5262	42.04	33.83	38.0407	39.6592	39.1483	38.2169	39.2085	38.6291	42.04	34.7409
42.08	37.1127	39.1182	39.389	39.076	38.4474	42.08	36.3193	39.5392	40.1441	39.6772	39.7731	39.377	42.08	36.3193	39.5392	40.1441	39.5452	38.9614	38.6291		42.08	31.2977	37.6936	38.7258	37.9495	37.1924	42.08	33.8111	38.0529	39.7252	39.1001	38.1501	42.08	33.8111	38.0529	39.6832	39.371	39.2747	38.5262	42.08	33.8111	38.0529	39.6832	39.1664	38.2473	39.2206	38.5988	42.08	34.6971
42.16	37.1311	39.1182	39.371	39.082	38.4353	42.16	36.3995	39.5332	40.156	39.6532	39.7192	39.2567	42.16	36.3995	39.5332	40.156	39.5392	39.0036	38.617		42.16	31.3299	37.6387	38.617	37.9799	37.3026	42.16	33.8553	38.0468	39.7072	39.1182	38.0954	42.16	33.8553	38.0468	39.7252	39.3108	39.2988	38.5201	42.16	33.8553	38.0468	39.7252	39.1904	38.3019	39.2145	38.6775	42.16	34.766
42.2	37.1066	39.2868	39.4791	39.0941	38.3989	42.2	36.3933	39.5452	40.1082	39.6892	39.7432	39.2807	42.2	36.3933	39.5452	40.1082	39.5452	39.0519	38.6472		42.2	31.317	37.7789	38.6472	37.9129	37.2597	42.2	33.8931	38.0164	39.7012	39.1423	38.1987	42.2	33.8931	38.0164	39.6652	39.3349	39.2868	38.4656	42.2	33.8931	38.0164	39.6652	39.0941	38.2412	39.2145	38.6714	42.2	34.7159
42.24	37.0821	39.2928	39.4671	39.0941	38.3868	42.24	36.3625	39.5932	40.1082	39.7492	39.7312	39.2928	42.24	36.3625	39.5932	40.1082	39.5392	38.9916	38.744		42.24	31.3041	37.8033	38.7138	37.9434	37.3882	42.24	33.8679	38.0529	39.6652	39.1483	38.144	42.24	33.8679	38.0529	39.6892	39.3108	39.371	38.5383	42.24	33.8679	38.0529	39.6892	39.0579	38.223	39.2145	38.623	42.24	34.6596
42.28	37.125	39.2807	39.4311	39.0519	38.3807	42.28	36.3933	39.6052	40.1202	39.7671	39.7432	39.3349	42.28	36.3933	39.6052	40.1202	39.5632	38.9916	38.7682		42.28	31.3106	37.7363	38.7138	38.0711	37.3209	42.28	33.8427	38.0346	39.6592	39.1182	38.0893	42.28	33.8427	38.0346	39.6772	39.3108	39.389	38.508	42.28	33.8427	38.0346	39.6772	39.1001	38.1805	39.1784	38.6351	42.28	34.622
42.32	37.125	39.1965	39.4131	39.0941	38.4111	42.32	36.381	39.5932	40.1262	39.7671	39.8091	39.4491	42.32	36.381	39.5932	40.1262	39.5272	39.0157	38.7258		42.32	31.3944	37.6936	38.6956	38.0893	37.2842	42.32	33.849	38.0711	39.7012	39.1603	38.1197	42.32	33.849	38.0711	39.6952	39.3589	39.2988	38.4414	42.32	33.849	38.0711	39.6952	39.1543	38.138	39.1121	38.6109	42.32	34.6596
42.36	37.0514	39.1965	39.4131	39.088	38.3929	42.36	36.3625	39.5872	40.1381	39.7552	39.8211	39.4371	42.36	36.3625	39.5872	40.1381	39.6172	39.0458	38.7621		42.36	31.4009	37.6204	38.7138	37.9495	37.3148	42.36	33.7985	38.0285	39.6832	39.1603	38.0893	42.36	33.7985	38.0285	39.7072	39.389	39.2928	38.4717	42.36	33.7985	38.0285	39.7072	39.1965	38.1926	39.1001	38.5988	42.36	34.6533
42.4	37.0514	39.1844	39.5152	39.2025	38.4171	42.4	36.3563	39.6052	40.156	39.7612	39.833	39.4791	42.4	36.3563	39.6052	40.156	39.6052	39.1302	38.7742		42.4	31.3428	37.6814	38.6956	37.9981	37.2597	42.4	33.849	38.065	39.6832	39.1965	38.1076	42.4	33.849	38.065	39.6592	39.383	39.2868	38.4717	42.4	33.849	38.065	39.6592	39.1724	38.2048	39.1061	38.623	42.4	34.7472
42.44	37.0207	39.2206	39.4912	39.1362	38.4595	42.44	36.381	39.6232	40.1441	39.7552	39.845	39.4852	42.44	36.381	39.6232	40.1441	39.5752	39.082	38.7621		42.44	31.3364	37.7728	38.6956	37.9981	37.2842	42.44	33.8994	38.0529	39.7132	39.2025	38.1137	42.44	33.8994	38.0529	39.7132	39.377	39.2988	38.4656	42.44	33.8994	38.0529	39.7132	39.1965	38.2594	39.082	38.6714	42.44	34.7722
42.48	37.0146	39.2326	39.4251	39.1664	38.4656	42.48	36.3995	39.5992	40.156	39.7492	39.851	39.4972	42.48	36.3995	39.5992	40.156	39.5512	39.076	38.7561		42.48	31.3364	37.7241	38.7802	38.0711	37.2597	42.48	33.8931	38.0407	39.7851	39.2025	38.1744	42.48	33.8931	38.0407	39.6892	39.3529	39.2627	38.4171	42.48	33.8931	38.0407	39.6892	39.2025	38.1926	39.1543	38.6109	42.48	34.7722
42.52	37.0698	39.2687	39.4972	39.1061	38.5807	42.52	36.4242	39.5212	40.2038	39.7552	39.839	39.4551	42.52	36.4242	39.5212	40.2038	39.6112	39.088	38.7742		42.52	31.3428	37.7241	38.8769	38.0164	37.1924	42.52	33.7922	37.992	39.8151	39.2145	38.1562	42.52	33.7922	37.992	39.6712	39.3229	39.3229	38.623	42.52	33.7922	37.992	39.6712	39.1121	38.2594	39.1904	38.617	42.52	34.7284
42.56	37.174	39.3048	39.5272	39.0458	38.5262	42.56	36.344	39.5992	40.2337	39.7252	39.851	39.389	42.56	36.344	39.5992	40.2337	39.6832	39.0338	38.7621		42.56	31.2912	37.6753	38.8165	37.9373	37.2108	42.56	33.7417	38.0103	39.7492	39.2025	38.144	42.56	33.7417	38.0103	39.6832	39.3229	39.3048	38.5141	42.56	33.7417	38.0103	39.6832	39.1362	38.2655	39.2386	38.617	42.56	34.7347
42.6	37.1679	39.3529	39.5152	39.0941	38.508	42.6	36.3625	39.6352	40.2575	39.7552	39.857	39.3409	42.6	36.3625	39.6352	40.2575	39.6892	39.0639	38.744		42.6	31.2654	37.6509	38.7984	37.9251	37.3148	42.6	33.767	37.986	39.845	39.2025	38.1137	42.6	33.767	37.986	39.7312	39.3409	39.3048	38.4595	42.6	33.767	37.986	39.7312	39.1362	38.2473	39.2988	38.623	42.6	34.7972
42.64	37.1005	39.3108	39.4972	39.0579	38.4595	42.64	36.3687	39.6412	40.2695	39.7372	39.8211	39.4431	42.64	36.3687	39.6412	40.2695	39.6652	39.07	38.7319		42.64	31.3364	37.6448	38.8044	38.0042	37.2659	42.64	33.8048	37.9677	39.7791	39.1784	38.1744	42.64	33.8048	37.9677	39.6532	39.4191	39.3048	38.4353	42.64	33.8048	37.9677	39.6532	39.1242	38.2715	39.3168	38.623	42.64	34.791
42.68	37.0759	39.3108	39.5032	39.0941	38.623	42.68	36.4118	39.6532	40.2695	39.7252	39.869	39.4912	42.68	36.4118	39.6532	40.2695	39.6172	39.0097	38.7138		42.68	31.3299	37.6509	38.8105	38.0529	37.2842	42.68	33.8931	38.0042	39.8031	39.0941	38.0772	42.68	33.8931	38.0042	39.6112	39.4611	39.3168	38.4414	42.68	33.8931	38.0042	39.6112	39.2266	38.3019	39.2687	38.7258	42.68	34.8285
42.72	37.0391	39.2807	39.5032	39.082	38.5746	42.72	36.418	39.6952	40.2933	39.8031	39.845	39.5812	42.72	36.418	39.6952	40.2933	39.5872	39.0338	38.7682		42.72	31.3428	37.7606	38.8165	38.065	37.3087	42.72	33.8994	37.9677	39.8271	39.1001	38.0833	42.72	33.8994	37.9677	39.6412	39.5152	39.3469	38.4717	42.72	33.8994	37.9677	39.6412	39.2145	38.2837	39.2928	38.6593	42.72	34.8035
42.76	37.0146	39.2326	39.5092	39.1061	38.5807	42.76	36.4057	39.6952	40.2635	39.851	39.8271	39.4611	42.76	36.4057	39.6952	40.2635	39.6352	39.1302	38.6835		42.76	31.2912	37.7058	38.7984	38.0468	37.2965	42.76	33.8742	37.986	39.8091	39.1302	38.1258	42.76	33.8742	37.986	39.6832	39.5632	39.3409	38.4959	42.76	33.8742	37.986	39.6832	39.1965	38.314	39.2988	38.7138	42.76	34.791
42.8	37.033	39.2747	39.4972	39.1242	38.5201	42.8	36.4488	39.7072	40.2993	39.8271	39.9588	39.5212	42.8	36.4488	39.7072	40.2993	39.5572	39.1543	38.8527		42.8	31.2719	37.6509	38.8588	38.0468	37.3026	42.8	33.8868	37.9555	39.8091	39.1543	38.3565	42.8	33.8868	37.9555	39.6952	39.4551	39.3409	38.4898	42.8	33.8868	37.9555	39.6952	39.1121	38.2533	39.2446	38.7138	42.8	34.791
42.84	37.033	39.3048	39.4491	39.1664	38.4595	42.84	36.455	39.6412	40.3053	39.8091	39.869	39.4791	42.84	36.455	39.6412	40.3053	39.5452	39.1362	38.8769		42.84	31.3235	37.6509	38.7923	38.0407	37.2965	42.84	33.8805	38.0529	39.7911	39.1603	38.223	42.84	33.8805	38.0529	39.7312	39.4371	39.365	38.4959	42.84	33.8805	38.0529	39.7312	39.1242	38.2533	39.2868	38.5201	42.84	34.7535
42.88	37.1311	39.2807	39.4311	39.1844	38.5807	42.88	36.4365	39.7012	40.2814	39.7971	39.851	39.4311	42.88	36.4365	39.7012	40.2814	39.5452	39.0277	38.9071		42.88	31.317	37.6509	38.7198	38.0407	37.3332	42.88	33.8868	38.0225	39.7851	39.1543	38.2351	42.88	33.8868	38.0225	39.7132	39.4431	39.3409	38.5504	42.88	33.8868	38.0225	39.7132	39.1724	38.2655	39.365	38.6775	42.88	34.6533
42.92	37.0759	39.3168	39.4491	39.1483	38.5807	42.92	36.4612	39.6952	40.2516	39.7911	39.9229	39.4371	42.92	36.4612	39.6952	40.2516	39.5752	39.0277	38.8648		42.92	31.259	37.6387	38.7621	38.0529	37.3148	42.92	33.8931	38.0407	39.8211	39.1965	38.2473	42.92	33.8931	38.0407	39.7072	39.4431	39.4431	38.5867	42.92	33.8931	38.0407	39.7072	39.2025	38.2776	39.3289	38.7138	42.92	34.7222
42.96	37.033	39.2988	39.4371	39.2085	38.508	42.96	36.5043	39.6772	40.2516	39.7791	39.9109	39.5092	42.96	36.5043	39.6772	40.2516	39.5572	39.0097	38.75		42.96	31.2848	37.6204	38.7984	38.0772	37.3026	42.96	33.8616	38.0772	39.845	39.1965	38.2048	42.96	33.8616	38.0772	39.7072	39.4551	39.4551	38.6291	42.96	33.8616	38.0772	39.7072	39.2025	38.314	39.3168	38.7077	42.96	34.7972
43.04	37.1005	39.2807	39.4791	39.2326	38.5262	43.04	36.5043	39.6652	40.2217	39.7791	39.8869	39.4912	43.04	36.5043	39.6652	40.2217	39.6112	39.1121	38.8105		43.04	31.2719	37.6265	38.8225	38.1137	37.3271	43.04	33.8742	38.0954	39.8031	39.2206	38.2169	43.04	33.8742	38.0954	39.6892	39.5572	39.4551	38.6714	43.04	33.8742	38.0954	39.6892	39.2507	38.308	39.3229	38.6533	43.04	34.7347
43.08	37.1188	39.2988	39.4912	39.2085	38.5019	43.08	36.3995	39.7132	40.2337	39.7851	39.9468	39.6112	43.08	36.3995	39.7132	40.2337	39.6652	39.1061	38.7379		43.08	31.388	37.6143	38.8225	38.0529	37.3271	43.08	33.8805	38.0407	39.8031	39.2025	38.2351	43.08	33.8805	38.0407	39.7072	39.5932	39.377	38.6472	43.08	33.8805	38.0407	39.7072	39.3048	38.3201	39.3409	38.6714	43.08	34.766
43.12	37.1862	39.3108	39.4912	39.1784	38.4898	43.12	36.3872	39.5932	40.3053	39.7791	39.9049	39.5572	43.12	36.3872	39.5932	40.3053	39.6352	39.0941	38.7984		43.12	31.3686	37.6021	38.8648	38.0407	37.3271	43.12	33.8616	38.0772	39.863	39.2567	38.1987	43.12	33.8616	38.0772	39.7492	39.5752	39.389	38.6412	43.12	33.8616	38.0772	39.7492	39.2747	38.3322	39.4311	38.7017	43.12	34.7597
43.16	37.1801	39.3409	39.4731	39.1965	38.5141	43.16	36.3933	39.7372	40.2814	39.7851	39.845	39.5332	43.16	36.3933	39.7372	40.2814	39.6472	39.1121	38.8588		43.16	31.3751	37.6509	38.8527	38.1076	37.3148	43.16	33.9246	37.992	39.881	39.2326	38.2048	43.16	33.9246	37.992	39.7312	39.4972	39.407	38.5262	43.16	33.9246	37.992	39.7312	39.2386	38.3626	39.365	38.744	43.16	34.7409
43.2	37.1679	39.3409	39.5032	39.2747	38.5201	43.2	36.3563	39.7252	40.2695	39.8031	39.833	39.5032	43.2	36.3563	39.7252	40.2695	39.6412	39.088	38.8346		43.2	31.3815	37.6509	38.8648	38.1137	37.2965	43.2	33.8805	37.9677	39.8271	39.3048	38.2351	43.2	33.8805	37.9677	39.7731	39.5212	39.4731	38.5201	43.2	33.8805	37.9677	39.7731	39.2507	38.3262	39.4131	38.6896	43.2	34.7535
43.24	37.1801	39.365	39.5272	39.2446	38.5686	43.24	36.344	39.7312	40.2993	39.7731	39.863	39.5752	43.24	36.344	39.7312	40.2993	39.6592	39.0579	38.8588		43.24	31.3815	37.6814	38.8648	38.1015	37.3393	43.24	33.8994	38.0225	39.845	39.3108	38.1987	43.24	33.8994	38.0225	39.7911	39.4852	39.4251	38.5443	43.24	33.8994	38.0225	39.7911	39.2507	38.3626	39.4251	38.6775	43.24	34.816
43.28	37.1679	39.383	39.5272	39.1121	38.5746	43.28	36.4118	39.7252	40.2993	39.7851	39.863	39.5692	43.28	36.4118	39.7252	40.2993	39.6592	39.1001	38.8346		43.28	31.3815	37.7302	38.8769	38.0833	37.2965	43.28	33.8994	37.992	39.833	39.3168	38.1926	43.28	33.8994	37.992	39.8031	39.5032	39.4311	38.5988	43.28	33.8994	37.992	39.8031	39.365	38.3686	39.389	38.6896	43.28	34.866
43.32	37.0882	39.3529	39.5452	39.082	38.5928	43.32	36.3625	39.845	40.2814	39.7372	39.881	39.5752	43.32	36.3625	39.845	40.2814	39.6592	39.082	38.8709		43.32	31.4266	37.7058	38.9131	38.1197	37.3087	43.32	33.9624	38.0103	39.8091	39.2446	38.1805	43.32	33.9624	38.0103	39.9109	39.5752	39.4791	38.5807	43.32	33.9624	38.0103	39.9109	39.2988	38.3989	39.4131	38.6533	43.32	34.8848
43.36	37.0882	39.2567	39.5212	39.1001	38.6351	43.36	36.3625	39.7911	40.2695	39.7791	39.8869	39.5092	43.36	36.3625	39.7911	40.2695	39.6412	39.088	38.8346		43.36	31.3686	37.6753	38.8225	38.0711	37.272	43.36	33.975	38.0346	39.839	39.2145	38.2533	43.36	33.975	38.0346	39.839	39.5392	39.4551	38.5867	43.36	33.975	38.0346	39.839	39.3289	38.4292	39.4912	38.6835	43.36	34.7972
43.4	37.0391	39.2807	39.5212	39.1182	38.5807	43.4	36.381	39.7971	40.2874	39.7971	39.845	39.5152	43.4	36.381	39.7971	40.2874	39.5992	39.1242	38.889		43.4	31.3686	37.6326	38.895	38.138	37.2965	43.4	33.9624	38.0103	39.8211	39.2206	38.2898	43.4	33.9624	38.0103	39.7971	39.5812	39.4611	38.617	43.4	33.9624	38.0103	39.7971	39.1965	38.4292	39.3589	38.6956	43.4	34.8035
43.44	37.0453	39.3048	39.5932	39.1001	38.6049	43.44	36.5105	39.833	40.2874	39.8091	39.875	39.5092	43.44	36.5105	39.833	40.2874	39.5392	39.1242	38.889		43.44	31.3557	37.6814	38.9916	38.1197	37.3332	43.44	33.9372	37.992	39.8211	39.2085	38.2776	43.44	33.9372	37.992	39.7552	39.4791	39.4791	38.7984	43.44	33.9372	37.992	39.7552	39.1904	38.4353	39.3589	38.7017	43.44	34.8348
43.48	37.0759	39.3048	39.4912	39.1543	38.6412	43.48	36.4242	39.8031	40.3411	39.9528	39.881	39.5512	43.48	36.4242	39.8031	40.3411	39.5392	39.1664	38.8044		43.48	31.4009	37.7241	38.8769	38.0893	37.3515	43.48	34.0191	38.0711	39.8271	39.2206	38.1926	43.48	34.0191	38.0711	39.7851	39.4791	39.5092	38.7621	43.48	34.0191	38.0711	39.7851	39.1844	38.3868	39.4131	38.6291	43.48	34.8348
43.52	37.125	39.3529	39.4611	39.1844	38.6472	43.52	36.4303	39.7612	40.3351	39.9229	39.9348	39.5572	43.52	36.4303	39.7612	40.3351	39.6592	39.1904	38.901		43.52	31.4073	37.7485	38.8648	38.144	37.3821	43.52	34.0065	38.0468	39.7492	39.2025	38.223	43.52	34.0065	38.0468	39.845	39.6232	39.4852	38.7138	43.52	34.0065	38.0468	39.845	39.1965	38.3868	39.407	38.6956	43.52	34.7785
43.56	37.1311	39.3469	39.4491	39.2386	38.623	43.56	36.4365	39.8091	40.3291	39.851	39.9588	39.5332	43.56	36.4365	39.8091	40.3291	39.6172	39.2085	38.9493		43.56	31.4266	37.7667	38.8829	38.2655	37.4004	43.56	34.0191	38.0529	39.8151	39.2627	38.2594	43.56	34.0191	38.0529	39.7492	39.5632	39.4791	38.7379	43.56	34.0191	38.0529	39.7492	39.2687	38.4111	39.4371	38.7198	43.56	34.7785
43.6	37.1617	39.383	39.4431	39.1302	38.6412	43.6	36.4612	39.7612	40.347	39.839	39.9528	39.5752	43.6	36.4612	39.7612	40.347	39.6412	39.1784	39.0639		43.6	31.4073	37.8277	38.8829	38.1744	37.3943	43.6	34.0065	38.0529	39.7971	39.2507	38.2473	43.6	34.0065	38.0529	39.7612	39.5512	39.5152	38.7077	43.6	34.0065	38.0529	39.7612	39.2868	38.405	39.377	38.8467	43.6	34.8473
43.64	37.1862	39.407	39.5212	39.2145	38.6291	43.64	36.4488	39.7312	40.359	39.875	39.9109	39.5812	43.64	36.4488	39.7312	40.359	39.6592	39.1362	39.0639		43.64	31.388	37.7363	38.8769	38.1744	37.4249	43.64	33.9939	37.986	39.7612	39.2446	38.2837	43.64	33.9939	37.986	39.7552	39.5752	39.6352	38.6291	43.64	33.9939	37.986	39.7552	39.2928	38.4111	39.4251	38.8225	43.64	34.8723
43.68	37.1862	39.4311	39.5572	39.2507	38.5928	43.68	36.418	39.7492	40.347	39.8989	39.9169	39.5452	43.68	36.418	39.7492	40.347	39.6952	39.1242	39.0036		43.68	31.4331	37.8033	38.9493	38.2048	37.3209	43.68	33.9624	38.0225	39.7971	39.2807	38.1805	43.68	33.9624	38.0225	39.7612	39.5992	39.5692	38.6109	43.68	33.9624	38.0225	39.7612	39.2868	38.405	39.377	38.7802	43.68	34.841
43.72	37.1495	39.407	39.5152	39.2928	38.6291	43.72	36.4242	39.8091	40.3172	39.9288	39.8869	39.5452	43.72	36.4242	39.8091	40.3172	39.6892	39.1724	39.0036		43.72	31.3944	37.7058	38.9192	38.1866	37.3699	43.72	33.9876	38.0711	39.9229	39.2747	38.2108	43.72	33.9876	38.0711	39.8151	39.5872	39.5872	38.617	43.72	33.9876	38.0711	39.8151	39.3229	38.3626	39.4131	38.8407	43.72	34.8535
43.76	37.125	39.4972	39.5152	39.2988	38.6654	43.76	36.4303	39.8151	40.2933	39.8989	39.9169	39.4551	43.76	36.4303	39.8151	40.2933	39.6412	39.1483	38.9373		43.76	31.4138	37.6997	38.9795	38.2169	37.3638	43.76	33.9372	38.065	39.857	39.2687	38.1926	43.76	33.9372	38.065	39.851	39.5932	39.5212	38.7984	43.76	33.9372	38.065	39.851	39.3229	38.4232	39.4371	38.8407	43.76	34.866
43.84	37.0821	39.4311	39.5932	39.365	38.6533	43.84	36.4858	39.857	40.2516	39.851	39.857	39.5452	43.84	36.4858	39.857	40.2516	39.6232	39.2266	38.895		43.84	31.4395	37.6936	38.9795	38.1683	37.3699	43.84	33.9435	38.0772	39.8151	39.2446	38.2412	43.84	33.9435	38.0772	39.833	39.6052	39.6052	38.6956	43.84	33.9435	38.0772	39.833	39.4371	38.4414	39.407	38.8648	43.84	34.816
43.88	37.1495	39.4311	39.5872	39.3469	38.6291	43.88	36.4673	39.845	40.2754	39.9049	39.869	39.5752	43.88	36.4673	39.845	40.2754	39.6352	39.2145	38.9131		43.88	31.4331	37.7545	38.9252	38.1319	37.3271	43.88	33.9939	38.0529	39.7731	39.3349	38.3262	43.88	33.9939	38.0529	39.857	39.6172	39.5452	38.6109	43.88	33.9939	38.0529	39.857	39.4131	38.4232	39.389	38.8467	43.88	34.816
43.92	37.174	39.4191	39.6412	39.3168	38.6654	43.92	36.4735	39.7372	40.2993	39.9109	39.845	39.5752	43.92	36.4735	39.7372	40.2993	39.6232	39.2266	38.9312		43.92	31.4524	37.6692	38.9131	38.138	37.3271	43.92	34.0002	38.0772	39.863	39.3409	38.3201	43.92	34.0002	38.0772	39.8031	39.5452	39.6052	38.5807	43.92	34.0002	38.0772	39.8031	39.3289	38.4111	39.407	38.7984	43.92	34.8598
43.96	37.1679	39.401	39.6232	39.2747	38.6654	43.96	36.4797	39.7312	40.3112	40.0485	39.875	39.6772	43.96	36.4797	39.7312	40.3112	39.6412	39.2507	38.9312		43.96	31.4975	37.6814	38.9795	38.1805	37.3026	43.96	33.9561	38.1258	39.8929	39.2567	38.3201	43.96	33.9561	38.1258	39.8271	39.5512	39.6232	38.623	43.96	33.9561	38.1258	39.8271	39.365	38.405	39.4551	38.8286	43.96	34.8598
44	37.174	39.4311	39.5932	39.3048	38.6593	44	36.4612	39.7192	40.3232	40.1262	39.9348	39.6712	44	36.4612	39.7192	40.3232	39.6832	39.2025	38.9916		44	31.4266	37.7058	38.9554	38.0954	37.2842	44	33.975	38.144	39.881	39.2928	38.2958	44	33.975	38.144	39.7971	39.5572	39.5992	38.617	44	33.975	38.144	39.7971	39.3229	38.405	39.4431	38.8648	44	34.8598
44.04	37.1801	39.4311	39.6052	39.2868	38.75	44.04	36.4365	39.7911	40.3649	40.1262	39.9169	39.5992	44.04	36.4365	39.7911	40.3649	39.7312	39.1182	39.0097		44.04	31.4975	37.7728	38.9674	38.1197	37.2781	44.04	34.1261	38.0893	39.8929	39.2807	38.2776	44.04	34.1261	38.0893	39.8271	39.6112	39.5992	38.6654	44.04	34.1261	38.0893	39.8271	39.365	38.3989	39.4191	38.8346	44.04	34.9223
44.08	37.1556	39.4491	39.5932	39.3168	38.6956	44.08	36.492	39.7731	40.3768	40.0485	39.9408	39.6292	44.08	36.492	39.7731	40.3768	39.7012	39.2145	39.0639		44.08	31.4331	37.718	38.9192	38.1744	37.3576	44.08	34.0443	38.1805	39.857	39.3289	38.2351	44.08	34.0443	38.1805	39.8151	39.6232	39.6052	38.7077	44.08	34.0443	38.1805	39.8151	39.371	38.4171	39.4431	38.8527	44.08	34.9285
44.12	37.125	39.389	39.6232	39.3409	38.6654	44.12	36.492	39.7132	40.3709	40.0006	39.9707	39.5812	44.12	36.492	39.7132	40.3709	39.7252	39.2206	39.0338		44.12	31.4524	37.718	38.9252	38.1805	37.376	44.12	34.0946	38.1319	39.881	39.3409	38.2715	44.12	34.0946	38.1319	39.8091	39.6292	39.6052	38.6835	44.12	34.0946	38.1319	39.8091	39.4371	38.405	39.4972	38.8165	44.12	34.8973
44.16	37.0882	39.389	39.6652	39.3589	38.5867	44.16	36.492	39.7252	40.353	40.0485	39.9707	39.6052	44.16	36.492	39.7252	40.353	39.6952	39.2266	39.1242		44.16	31.4975	37.7485	39.0036	38.2108	37.3515	44.16	34.0065	38.1683	39.851	39.3409	38.2473	44.16	34.0065	38.1683	39.833	39.6292	39.6052	38.6049	44.16	34.0065	38.1683	39.833	39.389	38.4111	39.4731	38.8165	44.16	34.9285
44.2	37.1617	39.4852	39.5512	39.3349	38.7863	44.2	36.4858	39.7731	40.3828	39.9348	39.9947	39.6952	44.2	36.4858	39.7731	40.3828	39.7671	39.2507	39.1182		44.2	31.4331	37.7606	39.0398	38.223	37.4004	44.2	34.0317	38.0893	39.8989	39.3048	38.2715	44.2	34.0317	38.0893	39.8211	39.7432	39.5932	38.6654	44.2	34.0317	38.0893	39.8211	39.3048	38.4414	39.4912	38.8407	44.2	34.8598
44.24	37.1924	39.4852	39.6112	39.383	38.5746	44.24	36.4981	39.7911	40.353	39.9408	40.0186	39.6652	44.24	36.4981	39.7911	40.353	39.7851	39.2627	39.0277		44.24	31.4202	37.7789	39.0458	38.2958	37.4249	44.24	34.0128	38.065	39.881	39.365	38.2898	44.24	34.0128	38.065	39.857	39.6652	39.6292	38.8467	44.24	34.0128	38.065	39.857	39.4191	38.4474	39.4671	38.8527	44.24	34.8598
44.28	37.1801	39.4852	39.6352	39.3589	38.623	44.28	36.5043	39.845	40.3888	39.9528	40.0485	39.6592	44.28	36.5043	39.845	40.3888	39.8091	39.2567	39.0217		44.28	31.446	37.7911	39.0398	38.2655	37.4432	44.28	34.0254	38.1258	39.8929	39.383	38.3201	44.28	34.0254	38.1258	39.869	39.6112	39.6532	38.8346	44.28	34.0254	38.1258	39.869	39.4371	38.4292	39.5212	38.8407	44.28	34.8535
44.32	37.1924	39.4131	39.6472	39.3289	38.7017	44.32	36.4981	39.8151	40.3828	40.0724	40.0186	39.6952	44.32	36.4981	39.8151	40.3828	39.7851	39.2988	39.082		44.32	31.446	37.8459	39.0036	38.3504	37.431	44.32	34.0443	38.308	39.8929	39.377	38.3262	44.32	34.0443	38.308	39.8929	39.6712	39.5992	38.8407	44.32	34.0443	38.308	39.8929	39.4251	38.4898	39.5572	38.7863	44.32	34.9535
44.36	37.1311	39.4371	39.6592	39.3469	38.7561	44.36	36.5782	39.7971	40.4245	40.0903	40.0126	39.7132	44.36	36.5782	39.7971	40.4245	39.7312	39.2807	39.1182		44.36	31.4717	37.7728	39.0097	38.2898	37.3943	44.36	34.0317	38.2473	39.8929	39.383	38.3807	44.36	34.0317	38.2473	39.857	39.5872	39.6232	38.6714	44.36	34.0317	38.2473	39.857	39.383	38.4898	39.5692	38.7984	44.36	34.8848
44.4	37.0882	39.4791	39.6592	39.3589	38.6835	44.4	36.5782	39.7731	40.3947	40.0066	40.0186	39.6772	44.4	36.5782	39.7731	40.3947	39.6712	39.2627	39.07		44.4	31.4846	37.8642	38.9554	38.2715	37.3638	44.4	34.0632	38.223	39.8989	39.3469	38.4414	44.4	34.0632	38.223	39.863	39.6652	39.6172	38.617	44.4	34.0632	38.223	39.863	39.3349	38.5019	39.6172	38.8467	44.4	34.9223
44.44	37.174	39.4791	39.6472	39.371	38.7017	44.44	36.5905	39.7612	40.4126	40.0305	39.9408	39.6892	44.44	36.5905	39.7612	40.4126	39.7312	39.2988	39.0639		44.44	31.4717	37.8642	38.9614	38.1866	37.3209	44.44	34.038	38.1987	40.0006	39.407	38.3565	44.44	34.038	38.1987	39.9049	39.6772	39.6232	38.6351	44.44	34.038	38.1987	39.9049	39.3168	38.5383	39.6652	38.9373	44.44	34.9035
44.48	37.1801	39.4791	39.7072	39.365	38.6896	44.48	36.5782	39.7731	40.4603	40.1381	40.0963	39.6712	44.48	36.5782	39.7731	40.4603	39.857	39.2687	39.0579		44.48	31.4524	37.8703	38.889	38.1866	37.4249	44.48	34.0506	38.1987	39.9767	39.407	38.3929	44.48	34.0506	38.1987	39.8989	39.6712	39.6592	38.6351	44.48	34.0506	38.1987	39.8989	39.3108	38.5019	39.6412	38.9252	44.48	34.941
44.52	37.2291	39.4972	39.6772	39.3289	38.6896	44.52	36.5721	39.8151	40.4603	40.0545	40.0485	39.6532	44.52	36.5721	39.8151	40.4603	39.8271	39.2687	39.0277		44.52	31.4653	37.7789	38.9433	38.1623	37.4494	44.52	34.0443	38.1987	39.9588	39.401	38.3322	44.52	34.0443	38.1987	39.881	39.6952	39.6412	38.6593	44.52	34.0443	38.1987	39.881	39.4431	38.5564	39.6472	38.8407	44.52	34.9348
44.56	37.1862	39.4671	39.6712	39.3409	38.6472	44.56	36.6029	39.845	40.4305	40.0365	40.0246	39.7012	44.56	36.6029	39.845	40.4305	39.7671	39.2747	39.0519		44.56	31.4717	37.8094	38.9614	38.1926	37.4677	44.56	34.0317	38.2169	39.8929	39.407	38.3504	44.56	34.0317	38.2169	39.8929	39.6052	39.6292	38.7258	44.56	34.0317	38.2169	39.8929	39.4491	38.4959	39.7312	38.8769	44.56	34.9223
44.6	37.2536	39.4431	39.7372	39.3168	38.7379	44.6	36.5474	39.7911	40.4245	40.1321	40.0126	39.6952	44.6	36.5474	39.7911	40.4245	39.7851	39.2988	39.0398		44.6	31.504	37.8399	38.9614	38.2108	37.4432	44.6	34.0128	38.1866	39.9229	39.4431	38.3747	44.6	34.0128	38.1866	39.9348	39.7372	39.5992	38.7379	44.6	34.0128	38.1866	39.9348	39.3349	38.508	39.6952	38.7923	44.6	34.8973
44.68	37.2291	39.4912	39.7492	39.3108	38.7319	44.68	36.5474	39.8091	40.4305	40.1321	40.0246	39.7612	44.68	36.5474	39.8091	40.4305	39.7791	39.3229	39.0639		44.68	31.4846	37.7972	38.9795	38.2533	37.4066	44.68	33.9939	38.1683	39.9049	39.4611	38.3686	44.68	33.9939	38.1683	39.9229	39.6832	39.6112	38.7923	44.68	33.9939	38.1683	39.9229	39.4371	38.4959	39.6892	38.8286	44.68	34.9035
44.72	37.2169	39.5152	39.6652	39.371	38.6896	44.72	36.5228	39.857	40.4066	40.1142	40.0843	39.7791	44.72	36.5228	39.857	40.4066	39.839	39.389	39.0398		44.72	31.4717	37.8155	39.0157	38.2837	37.4921	44.72	34.0317	38.1866	39.9288	39.4491	38.3262	44.72	34.0317	38.1866	39.9169	39.7372	39.7012	38.7621	44.72	34.0317	38.1866	39.9169	39.4191	38.4959	39.6832	38.8527	44.72	34.941
44.76	37.223	39.5152	39.7432	39.407	38.6835	44.76	36.6336	39.8929	40.4245	40.0724	40.0724	39.7851	44.76	36.6336	39.8929	40.4245	39.7252	39.2868	39.1603		44.76	31.4911	37.8094	39.0036	38.2776	37.4555	44.76	34.0821	38.2776	39.9468	39.4731	38.2958	44.76	34.0821	38.2776	39.9468	39.6532	39.6832	38.7561	44.76	34.0821	38.2776	39.9468	39.4191	38.5262	39.7132	38.8286	44.76	34.8973
44.8	37.2414	39.5392	39.6892	39.4131	38.6714	44.8	36.5536	39.881	40.4722	40.0963	40.0604	39.8031	44.8	36.5536	39.881	40.4722	39.8031	39.2868	39.1302		44.8	31.4653	37.7485	39.07	38.3322	37.5349	44.8	34.0632	38.2351	39.9887	39.4431	38.3019	44.8	34.0632	38.2351	40.0006	39.6652	39.6832	38.7379	44.8	34.0632	38.2351	40.0006	39.4371	38.5867	39.7252	38.901	44.8	34.9098
44.84	37.2291	39.6112	39.7312	39.4191	38.6654	44.84	36.6398	39.8929	40.4543	40.1082	40.0843	39.7731	44.84	36.6398	39.8929	40.4543	39.845	39.389	39.1483		44.84	31.4717	37.7363	39.1182	38.3322	37.4738	44.84	34.0569	38.2655	39.9468	39.4491	38.3322	44.84	34.0569	38.2655	40.0425	39.6712	39.6772	38.7319	44.84	34.0569	38.2655	40.0425	39.4371	38.5019	39.6892	38.8648	44.84	34.9472
44.88	37.2108	39.5752	39.6952	39.4491	38.7379	44.88	36.6213	39.9647	40.4603	40.1262	40.1441	39.7132	44.88	36.6213	39.9647	40.4603	39.875	39.389	39.1302		44.88	31.4975	37.7606	39.1061	38.405	37.5166	44.88	34.0443	38.2837	39.9947	39.4491	38.308	44.88	34.0443	38.2837	40.0126	39.7552	39.7252	38.7379	44.88	34.0443	38.2837	40.0126	39.4431	38.4777	39.6472	38.8588	44.88	34.9223
44.92	37.2291	39.5752	39.6532	39.4731	38.7621	44.92	36.6029	39.9528	40.4662	40.2456	40.0784	39.7312	44.92	36.6029	39.9528	40.4662	39.863	39.407	39.1664		44.92	31.5297	37.7606	39.0579	38.3807	37.4921	44.92	34.0317	38.2776	40.0365	39.4251	38.3383	44.92	34.0317	38.2776	39.9887	39.7492	39.6592	38.7621	44.92	34.0317	38.2776	39.9887	39.5032	38.4838	39.6112	38.889	44.92	34.9035
44.96	37.3026	39.5572	39.6412	39.5452	38.7802	44.96	36.5967	39.9707	40.5675	40.2277	40.1441	39.7612	44.96	36.5967	39.9707	40.5675	39.851	39.4431	39.1182		44.96	31.5812	37.7728	39.0639	38.308	37.4982	44.96	34.0317	38.1805	40.0126	39.4371	38.3444	44.96	34.0317	38.1805	39.9767	39.7072	39.7012	38.7379	44.96	34.0317	38.1805	39.9767	39.4131	38.508	39.6352	38.8467	44.96	34.9035
[truncated: 12,015 more rows]
[truncated: 12 more columns]
